# Supplementary material
Source: Research Square preprint supplement (doi:10.21203/rs.3.rs-9188810/v1)
Supplement: Supplementary file 1 [file d9b776b135444e2da6e7ab7b.xlsx]

## Sheet: Contents
Appendix S1
Supporting Information for Priorities of woody species trait-climate associations at continental scale
Table S1	Hypothesized mechanistic contributions of traits to stress avoidance or resistance with respect to cold or aridity, based on previous studies across diverse species. Traits are related to stress avoidance, characterized by active growth during favorable conditions and dormancy otherwise, and/or to stress resistance, characterized by sustained function during stress; traits may contribute to avoid…
Table S2	Environmental variables used to estimate climate for 328 species-site combinations, including 246 unique woody species sampled from 16 ecosystems across a climatic gradient across the continental U.S.A and northern Mexico, including abbreviations, units, source database, metadata (raster layer title, timeframe of the dataset, the subset of the original dataset that was used to calculate species c…
Table_S3	List of 328 species-site combinations, including 246 unique woody species sampled from 16 ecosystems across the continental U.S.A and northern Mexico, and associated metadata, including site name and site code, species scientific name, species code (the first two letters of genus and species), vegetation type, and year of trait data collection.
Table_S4	Results of analyses of variance for 59 plant traits for 328 species-site combinations, including 246 unique woody species sampled from 16 ecosystems across the continental U.S.A and northern Mexico. Values in each cell represent sum of squares degrees of freedom, p-values, and percent of variance explained. Analyses of variance were conducted (A) testing the significance of variation across speci…
Table_S5	Principal Components Analysis (PCA) loadings of eight climate variables across eight principal components (PC1–PC8). Values indicate the contribution of each climate variable—mean annual variables—precipitation (MAP), temperature (MAT), aridity index (MAAI), potential evapotranspiration (PET)— and growing season variables—aridity index (GSAI), PET (GSPET), precipitation (GSP), and temperature (GS…
Table_S6	Principal Component Analysis (PCA) scores for eight climate-related principal component axes (PC1–PC8) for 328 species-site combinations, including 246 unique woody species sampled from 16 ecosystems across the continental U.S.A and northern Mexico. Each species is represented by a unique code combination of the first two letters of genus and species, and axis scores indicate the relative loading…
Table_S7	Correlation matrix for 59 traits across 328 species-site combinations, including 246 unique woody species sampled from 16 ecosystems across the continental U.S.A and northern Mexico, against eight climate variables for the mean of species’ native ranges— mean annual precipitation (MAP), mean annual temperature (MAT), mean annual aridity index (MAAI), potential evapotranspiration (PET), growing se…
Table_S8	Correlation matrix for 59 traits across 328 species-site combinations, including 246 unique woody species sampled from 16 ecosystems across the continental U.S.A and northern Mexico, against eight climate variables for the mean of species’ native ranges— mean annual precipitation (MAP), mean annual temperature (MAT), mean annual aridity index (MAAI), potential evapotranspiration (PET), growing se…
Table S9	Correlation matrix for 59 traits across 328 species-site combinations, including 246 unique woody species sampled from 16 ecosystems across the continental U.S.A and northern Mexico, against eight climate variables for the sampled sites— mean annual precipitation (MAP), mean annual temperature (MAT), mean annual aridity index (MAAI), potential evapotranspiration (PET), growing season aridity inde…
Table_S10	Correlation matrix for 59 traits across 328 species-site combinations, including 246 unique woody species sampled from 16 ecosystems across the continental U.S.A and northern Mexico, against eight climate variables for the sampled sites— mean annual precipitation (MAP), mean annual temperature (MAT), mean annual aridity index (MAAI), potential evapotranspiration (PET), growing season aridity inde…
Table_S11	Results of one-way ANOVAs on log-transformed correlation coefficients (log r) for significant trait-climate correlations, considering the mean climate of species’ native ranges, to test differences in numbers of significant correlations among mean annual (MA) climate variables, among mean growing season (GS) climate variables, and between annual and growing season variables of each type. Analyses…
Table_S12	Summary of multiple regressions predicting traits from the mean annual precipitation (MAP) and mean annual temperature (MAT) of species’ native ranges for 59 traits across 328 species-site combinations, including 246 unique woody species sampled from 16 ecosystems across the continental U.S.A and northern Mexico, and the importance of MAP and MAT assessed using hierarchical partitioning. For each…
Table_S13	Tests of differences in the numbers and strengths of correlations and of 59 traits with site climate variables for 328 species’ site combinations across 16 ecosystems of the continental USA and northern Mexico. For tests of proportions of significant correlations, pairwise proportion tests were used; tests of correlations strength were based on meta-analysis (log-ratio tests); Significant differe…
Table_S14	Results of one-way ANOVAs on log-transformed correlation coefficients (log r) for significant trait-climate correlations, considering site climates, to test differences in numbers of significant correlations among mean annual (MA) climate variables, among mean growing season (GS) climate variables, and between annual and growing season variables of each type. Analyses were performed using species…
Table_S15	Summary of multiple regressions predicting traits from the mean annual precipitation (MAP) and mean annual temperature (MAT) of site climates for 59 traits across 328 species-site combinations, including 246 unique woody species sampled from 16 ecosystems across the continental U.S.A and northern Mexico, and the importance of MAP and MAT assessed using hierarchical partitioning. For each trait mo…
Table_S16	Coefficients of variation (CV) and associated statistics for mean annual precipitation (MAP) and mean annual temperature (MAT) for the mean climate of species’ native ranges for 328 species-site combinations, including 246 unique woody species sampled from 16 ecosystems across the continental U.S.A and northern Mexico. Values were transformed (log + 2) prior to analyses. Negative SLRT values indi…
Table_S17	Coefficients of variation (CV) and associated statistics for mean annual precipitation (MAP) and mean annual temperature (MAT) for site means for 328 species-site combinations, including 246 unique woody species sampled from 16 ecosystems across the continental U.S.A and northern Mexico. Values were transformed (log + 2) prior to analyses. Negative SLRT values indicate higher CV in MAT than MAP.

## Sheet: Table_S1
Table S1	Hypothesized mechanistic contributions of traits to stress avoidance or resistance with respect to cold or aridity, based on previous studies across diverse species. Traits are related to stress avoidance, characterized by active growth during favorable conditions and dormancy otherwise, and/or to stress resistance, characterized by sustained function during stress; traits may contribute to avoid…
Srl. No	Trait	Symbol	Unit	Hypothesis	References
1	Stomatal density	d_sum_sto	µm-2	(A) High stomatal density increases uptake of CO2 during favorable conditions, whereas stomatal would close during stressful periods; (R) Lower density reduces transpiration and conserves water under sustained drought or cold stress.	(Hetherington and Woodward 2003; Medeiros et al. 2023)
	Stomatal ratio, the ratio of adaxial to total stomatal density	SR	unitless	(A) Higher stomatal ratio increases higher CO2 uptake while maintaining water-use efficiency in stressful conditions (R) Lower stomatal ratio found in lower latitudes where fewer resources are available	(Liu et al. 2024)
2	Stomatal area	s_avg	µm2	(A and R) Smaller stomata open/close quickly, enabling fast response to stressful conditions.	(Lawson 2009; Drake et al. 2013)
3	Epidermal cell area	e_avg	µm2	(A) Smaller epidermal cells may be associated with higher stomatal density, and/or with greater cell drought tolerance (R)	(Cutler et al. 1977; Sack and Buckley 2016)
4	Stomatal index	i_avg	unitless	A higher stomatal index may be associated with higher stomatal density, which would contribute to A and/or R (see above).	(Sack and Buckley 2016)
5	Maximum anatomical stomatal conductance	gmax_sum	mmol m-2 s-1	(A) High maximum stomatal conductance increases uptake of CO2 during favorable conditions, whereas stomatal would close during stressful periods; (R) Lower maximum stomatal conductance reduces transpiration and conserves water under sustained drought or cold stress.	(Hetherington and Woodward 2003; Medeiros et al. 2023)
6	Trichome density	t_avg_tri	n µm-2	(R) Trichome reflect intense light, increases leaf boundary‐layer and water conservation, and deters herbivores—useful in both drought and cold.	(Sack and Buckley 2020)
7	Leaf area	LA	cm2	(A) Small leaves may have thinner boundary layers, and thus higher rates of gas exchange in well watered soil, and (R) smaller leaves may prevent overheating or chilling through greater coupling with air temperature, and may have higher major vein densities and thus resist hydraulic decline due to vein embolism.	(Sack et al. 2012; Wright et al. 2017)
8	Leaf mass per area	LMA	g m-2	Low LMA speeds growth, may facilitate leaf shedding during drought (A); high LMA represents durable, long lifespan leaves with costs amortized over a longer period (R)	(Wright et al. 2004)
11	Leaf thickness	LT	mm	Leaf thickness may contribute to LMA (see above); in addition, thicker leaves have lower surface area: volume and potentially improved water storage (R and A), and potentially lower leaf hydraulic conductance (R)	(Witkowski and Lamont 1991; Niinemets 2001; Brodribb et al. 2007, 2007)
12	Leaf density	LD	g cm-3	Leaf density may contribute to LMA (see above); in addition, high density leaves may have thicker cell walls, reducing damage under stress (resistance).	(Witkowski and Lamont 1991; Niinemets 2001)
13	Leaf dry matter content	LDMC	g g-1	Low LDMC supports fast growth (A); high LDMC indicates tough, conservative leaves with high resistance to damage (R)	(Díaz et al. 2016)
14	Saturated water content	SWC	g g-1	High water content per leaf mass may contribute to storage that may amerliorate function during stress (R), or may be linked with low LMA (A)	(Sack et al. 2003)
15	Saturated water mass per area	SWMA	g m-2	High water content per leaf area may contribute to storage that may amerliorate function during stress (R), or may be linked with low LMA (A)	(Sack et al. 2003)
16	Percentage loss area (dry)	PLAdry	%	Greater leaf shrinkage may relate to a reduction of exposed area (A) whereas less shrinkage may reflect water saving during drought (R)	(Scoffoni et al. 2014)
17	Percentage loss thickness (dry)	PLTHdry_	%	Less shrinkage may reflect water saving during drought (R)	(Scoffoni et al. 2014)
18	Petiole to leaf area ratio	PA:LA		High PA:LA would confer additional hydraulic supply that could contribute to rapid gas exchange (A) and/or to redundant supply protecting against loss of conductance due to embolism (R)	(Salisbury 1913; Sack et al. 2003a; Blackman et al. 2024)
19	Petiole to leaf dry mass ratio	PA.Drymass	cm2.g-	High PA to leaf dry mass would support a high LMA (see above)	(Royer et al. 2007)
20	Petiole mass per area	PMA	g.cm-2	Higher PMA increases mechanical stability and hydraulic safety in stress (R)	(Niinemets et al. 2007)
21	Wood density	WD	g cm-3	Low WD accelerates growth (A); high WD resists xylem implosion/cavitation and increases longevity (R).	(Chave et al. 2009)
22	Sapwood area to leaf ratio	HuberValue	unitless	Higher sapwood per leaf supports high delivery of water to leaves during favorable conditions (A).	(Mencuccini et al. 2019)
	Ratio between WD bark thickness and WD stem Diameter without bark	BarkThicknessStemDiameterRation	mm	Higher bark thickness relative to stem diameter can increase protection against mechanical damage and fire, and may contribute to xylem hydraulic safety (R)	(Nie et al. 2022; Rosell 2016)
23	Carbon per leaf mass	Cmass	mg g-1	Lower C supports rapid, low-cost tissues; higher C indicates lignified, durable tissues enhancing resistance (R).	(Medeiros et al. 2023)
24	Nitrogen per leaf mass	Nmass	mg g-1	Higher N increases photosynthesis through Rubisco and electron transport rate (A) and can also sustain performance under stress by increasing replacement capacity and productivity relative to water loss (R).	(Wright et al. 2017)
25	Phosphorus per leaf mass	Pmass	mg g-1	Elevated P speeds ATP/energy transfer and RuBP regeneration for rapid assimilation (A) and storage for maintained productivity during stress (R)	(Wright et al. 2017)
26	Potassium per leaf mass	Kmass	mg g-1	K regulates stomatal closing and opening of stomata (A) maintains turgor, CO2 fixation under drought/cold (R)	(Wang et al. 2013; Seleiman et al. 2021; Liaqat et al. 2022)w
27	Calcium per leaf mass	Camass	mg g-1	Ca strengthens cell walls and signaling; supports both rapid growth (cell expansion) and structural stability under stress (A and R)	(de Bang et al. 2021; Kour et al. 2023)
28	Magnesium per leaf mass	Mgmass	mg g-1	Central to uptake of nutrients, chlorophyll and Rubisco activation—Mg supports high photosynthetic capacity and resilience of photosystems (A and/or R)	(de Bang et al. 2021; Ishfaq et al. 2022)
29	Iron per leaf mass	Femass	ppm	Essential for electron transport; high concentration potentially supports rapid light reactions and repair under stress (A and/or R)	(Zhang et al. 2015; Yang et al. 2025)
30	Boron per leaf mass	Bmass	ppm	Cell wall/cross-linking and membrane integrity—facilitates growth and stress stability (A and/or R)	(Vera-Maldonado et al. 2024)
31	Manganese per leaf mass	Mnmass	mg g-1	Component of photosystem II and antioxidant enzymes—facilitates growth and stress stability (A and/or R)	(Young et al. 2015)(Young et al. 2015)
32	Sodium per leaf mass	Namass	mg g-1	Osmotic functions, aiding rapid regulation (A and/or R)	(Mateus et al. 2021; Sardans and Peñuelas 2021)
33	Zinc per leaf mass	Znmass	mg g-1	Cofactor for many enzymes including antioxidant systems—supports high metabolism and stress defense (A and/or R)	(Guan et al. 2025)(Guan et al. 2025)
34	Copper per leaf mass	Cumass	mg g-1	Electron transport cofactor; supports photosynthesis and oxidative stress control. (A and/or R)	(Chen et al. 2022)
35	Molybdenum per leaf mass	Momass	mg g-1	N-metabolism (nitrate reductase) and ABA biosynthesis—enables rapid assimilation and stomatal control under stress (A and/or R)	(Rana et al. 2020)
36	Cobalt per leaf mass	Comass	mg g-1	Trace roles in enzymes and stress signaling, supporting metabolic flexibility and tolerance (A and/or R)	(Hu et al. 2025)
37	Aluminum per leaf mass	Almass	mg g-1	Sequestration/complexation indicates detox capacity, potentially aiding survival in poor soils while allowing growth bursts (A and/or R)	(Ofoe et al. 2023)
38	Arsenic per leaf mass	Asmass	mg g-1	Accumulation/sequestration reflects detox mechanisms enabling persistence in stressful substrates without halting growth.(A and/or R)	(Abbas et al. 2018)
39	Cadmium per leaf mass	Cdmass	mg g-1	Chelation/vacuolar storage supports both growth opportunities and resistance to toxic stress (A and/or R)	(Hu et al. 2025)
40	Rubidium per leaf mass	Rbmass	mg g-1	May act as a potassium analog, and thus may play regulatory role (A and/or R)	(Maynard and Baker 1965)
41	Strontium per leaf mass	Srmass	mg g-1	Ca analogue; associated with cell wall stability and signaling under stress (A and/or R)	(Moulick et al. 2024)
42	Selenium per leaf mass	Semass	mg g-1	Antioxidant roles support rapid photosynthesis and stress tolerance (A and/or R)	(Moulick et al. 2024)
43	Nickel per leaf mass	Nimass	mg g-1	Supports N metabolism and can aid stress detox pathways (A and/or R)	(Rodríguez-Jiméne et al.2016)
44	Chlorophyll per area	Chl	SPAD	High chlorophyll increases light capture and supports maintenance of photosynthesis under stress (A and/or R)	(Sack et al. 2003; Li et al. 2018)
45	Nitrogen per area	Narea	SPAD	High N per area boosts Rubisco and electron transport rate for both rapid and sustained performance. (A and/or R)	(Wright et al. 2004)
46	Nitrogen to phosphorus ratio	N:P		Low N:P (higher P) facilitates fast growth; higher N:P often reflects conservative strategy with N-rich, durable proteins under limitation (A and/or R)	(Yong et al. 2025)
47	Carbon to nitrogen ratio	C:N		High C:N enables rapid turnover; high C:N indicates carbon-rich, tough tissues resisting herbivory and stress.(A and/or R)	(Li et al. 2020; Medeiros et al. 2023)
48	Carbon isotope discrimination	D13C	‰	Higher discrimination (lower intrinsic water use efficiency) indicates high stomatal conductance and assimilation (A); low discrimination (higher intrinsic water use efficiency) enables higher productivity under limited soil, and maintained productivity under stress (A and R)	(Seibt et al. 2008; Cernusak et al. 2013; Medeiros et al. 2023)
49	Turgor loss point	πtlp	MPa	Lower TLP enhances resistance by maintaining turgor at low soil and leaf water potentials (R)	(Bartlett et al. 2014; Medeiros et al. 2023)
50	Leaf hydraulic conductance at leaf water potential of -0.1 MPa	K0.1_mmol.m-2.s-1.MPa-1	MPa	High maximum conductance promotes high flux (A) but risks hydraulic failure; a lower maximum K may correspond to reduced metabolic costs and greater safety of the hydraulic system (R)	(Nardini and Luglio 2014; Scoffoni et al. 2016)
51	Leaf water potential at 80% decline of K0.1	psi_K0.1_80_-Mpa	MPa	Sensitive hydraulic vulnerability can promote stomatal closure and increase intrinsic water use efficiency under stress (A); low vulnerability enables maintained function under stress (R)	(Nardini and Luglio 2014; Scoffoni et al. 2016)
52	Mean maximum electron transport rate at 25C from Axci curves	Jmax area	µmol m-2 s-1	Greater electron transport capacity supports rapid assimilation (A) and potentially maintained function under stress (R)	(Ali et al. 2015)
53	Maximum carboxylation rate per area	Vc max area	µmol m-2 s-1	Greater carboxylation capacity supports rapid assimilation (A) and potentially maintained function under stress (R)	(Ali et al. 2015)
54	Time integrated leaf CO2 assimilation rate per area	Aarea	µmol m-2 s-1	Greater cumulative assimilation can enable rapid growth (A) and maintained carbon gain under stress (R).	(Domingues et al. 2010; Walker et al. 2017)
55	Time integrated stomatal conductance	Gcleaf	mmol m-2 s-1	(A) High integrated maximum stomatal conductance increases uptake of CO2 during favorable conditions, whereas stomatal would close during stressful periods; (R) Lower maximum stomatal conductance reduces transpiration and conserves water under sustained drought or cold stress.	(Franks et al. 2009)
56	Time integrated/ maximum stomatal conductance ratio	Gcleaf:Gmax		(A) Large relative stomatal aperture increases uptake of CO2 during favorable conditions, whereas stomatal would close during stressful periods; (R) Lowerrelative stomatal aperture reduces transpiration and conserves water under sustained drought or cold stress.	(Franks et al. 2009)
57	Maximum stomatal conductance/ nitrogen per area ratio	Gmax:Narea	mmol g-1 s-1	A low stomatal conductance relative to nitrogen investment may confer greater water use efficiency (A and R)	(Wright et al. 2004; Medeiros et al. 2023)
58	Maximum height TRY***	Hmax	m	Tall stature may relate to access to high irradiance and improved dispersal (A), whereas lower stature may involve less hydraulic risk (R)	(Moles et al. 2009; Scoffoni et al. 2016)
59	SeedMassTRY		mg	Larger seeds have more resources and therefore aid in plant growth in low resource conditions (R); smaller seeds are associated with greater propagule number and dispersal and rapid seedling establishment in high resource conditions (A)	(Marañón and Grubb 1993; Grubb 1998; Rose and Poorter 2003)
	References
	Abbas, G., B. Murtaza, I. Bibi, M. Shahid, N. K. Niazi, M. I. Khan, M. Amjad, et al. 2018. Arsenic Uptake, Toxicity, Detoxification, and Speciation in Plants: Physiological, Biochemical, and Molecular Aspects. International Journal of Environmental Research and Public Health 15:59.
	Ali et al. 2015. Global‐scale environmental control of plant photosynthetic capacity - Ali - 2015 - Ecological Applications - Wiley Online Library.
	Bartlett, M. K., Y. Zhang, N. Kreidler, S. Sun, R. Ardy, K. Cao, and L. Sack. 2014. Global analysis of plasticity in turgor loss point, a key drought tolerance trait. Ecology Letters 17:1580–1590.
	Blackman, C. J., B. Halliwell, G. E. Hartill, and T. J. Brodribb. 2024. Petiole XLA (xylem to leaf area ratio) integrates hydraulic safety and efficiency across a diverse group of eucalypt leaves. Plant, Cell & Environment 47:49–58.
	Brodribb, T. J., T. S. Feild, and G. J. Jordan. 2007. Leaf maximum photosynthetic rate and venation are linked by hydraulics. Plant Physiology 144:1890–1898.
	Cernusak et al. 2013. Environmental and physiological determinants of carbon isotope discrimination in terrestrial plants - Cernusak - 2013 - New Phytologist - Wiley Online Library.
	Chave et al. 2009. Towards a worldwide wood economics spectrum.
	Chen, G., J. Li, H. Han, R. Du, and X. Wang. 2022. Physiological and Molecular Mechanisms of Plant Responses to Copper Stress. International Journal of Molecular Sciences 23:12950.
	Cutler, J. M., D. W. Rains, and R. S. Loomis. 1977. The Importance of Cell Size in the Water Relations of Plants. Physiologia Plantarum 40:255–260.
	de Bang, T. C., S. Husted, K. H. Laursen, D. P. Persson, and J. K. Schjoerring. 2021. The molecular–physiological functions of mineral macronutrients and their consequences for deficiency symptoms in plants. New Phytologist 229:2446–2469.
	Díaz, S., J. Kattge, J. H. C. Cornelissen, I. J. Wright, S. Lavorel, S. Dray, B. Reu, et al. 2016. The global spectrum of plant form and function. Nature 529:167–171.
	Domingues et al. 2010. Co‐limitation of photosynthetic capacity by nitrogen and phosphorus in West Africa woodlands.
	Drake, P. L., R. H. Froend, and P. J. Franks. 2013. Smaller, faster stomata: scaling of stomatal size, rate of response, and stomatal conductance. Journal of Experimental Botany 64:495–505.
	Franks et al. 2009. Plasticity in maximum stomatal conductance constrained by negative correlation between stomatal size and density: an analysis using Eucalyptus globulus.
	Grubb, P. J. 1998. Seed mass and light-demand: the need to control for soil–type and plant stature. New Phytologist 138:169–170.
	Guan, Y., L. Lu, J. Liu, M. Lyu, X. Xu, Y. Xing, Z. Feng, et al. 2025. Zinc promotes nitrogen uptake and plant growth by regulating the antioxidant system and carbon–nitrogen metabolism under drought condition in apple plants. Plant Physiology and Biochemistry 221:109619.
	Hetherington, A. M., and F. I. Woodward. 2003. The role of stomata in sensing and driving environmental change. Nature 424:901–908.
	Hu, J., B. Wu, F. Peng, J. Duo, Y. Huang, S. Zheng, and Q. Zheng. 2025. Cadmium accumulation potential and detoxication mechanism of Koenigia tortuosa: A novel extremely hardy plant from high altitude lead-zinc mine in Qinghai-Tibet Plateau. Chemosphere 372:144112.
	Ishfaq, M., Y. Wang, M. Yan, Z. Wang, L. Wu, C. Li, and X. Li. 2022. Physiological Essence of Magnesium in Plants and Its Widespread Deficiency in the Farming System of China. Frontiers in Plant Science 13.
	Kour, J., K. Khanna, A. D. Singh, S. Dhiman, T. Bhardwaj, K. Devi, N. Sharma, et al. 2023. Calcium’s multifaceted functions: From nutrient to secondary messenger during stress. South African Journal of Botany 152:247–263.
	Lawson, T. 2009. Guard cell photosynthesis and stomatal function. New Phytologist 181:13–34.
	Li, X., M. Sanagi, Y. Lu, Y. Nomura, S. C. Stolze, S. Yasuda, Y. Saijo, et al. 2020. Protein Phosphorylation Dynamics Under Carbon/Nitrogen-Nutrient Stress and Identification of a Cell Death-Related Receptor-Like Kinase in Arabidopsis. Frontiers in Plant Science 11.
	Li, Y., C. Liu, J. Zhang, H. Yang, L. Xu, Q. Wang, L. Sack, et al. 2018. Variation in leaf chlorophyll concentration from tropical to cold-temperate forests: Association with gross primary productivity. Ecological Indicators 85:383–389.
	Liaqat, S., S. Chhabra, P. Saffeullah, N. Iqbal, and T. O. Siddiqi. 2022. Role of Potassium in Drought Adaptation: Insights into Physiological and Biochemical Characteristics of Plants. Pages 143–162 in N. Iqbal and S. Umar, eds. Role of Potassium in Abiotic Stress. Springer Nature, Singapore.
	Liu et al. 2024. Climate factors determine large-scale spatial patterns of stomatal index in Chinese herbaceous and woody dicotyledonous plants. Science of The Total Environment 949:175112.
	Nie et al. 2022. Characteristics and factors driving the variations in bark thickness of major woody plants in China. Ecological Indicators 144:109447.
	Marañón, T., and P. J. Grubb. 1993. Physiological Basis and Ecological Significance of the Seed Size and Relative Growth Rate Relationship in Mediterranean Annuals. Functional Ecology 7:591–599.
	Mateus, N. de S., A. L. Florentino, E. F. Santos, A. de V. Ferraz, J. L. de M. Goncalves, and J. Lavres. 2021. Partial Substitution of K by Na Alleviates Drought Stress and Increases Water Use Efficiency in Eucalyptus Species Seedlings. Frontiers in Plant Science 12.
	Maynard, D. N., and J. H. Baker. 1965. The influence of rubidium-potassium levels on growth and ion accumulation in tomato. Plant and Soil 23:137–140.
	Medeiros, C. D., C. Henry, S. Trueba, I. Anghel, S. D. D. de L. Guerrero, A. Pivovaroff, L. R. Fletcher, et al. 2023. Predicting plant species climate niches on the basis of mechanistic traits. Functional Ecology 37:2786–2808.
	Mencuccini, M., T. Rosas, L. Rowland, B. Choat, H. Cornelissen, S. Jansen, K. Kramer, et al. 2019. Leaf economics and plant hydraulics drive leaf : wood area ratios. New Phytologist 224:1544–1556.
	Moles et al. 2009. Global patterns in plant height - Moles - 2009 - Journal of Ecology - Wiley Online Library.
	Moulick, D., A. Mukherjee, A. Das, A. Roy, A. Majumdar, A. Dhar, B. K. Pattanaik, et al. 2024. Selenium – An environmentally friendly micronutrient in agroecosystem in the modern era: An overview of 50-year findings. Ecotoxicology and Environmental Safety 270:115832.
	Nardini, A., and J. Luglio. 2014. Leaf hydraulic capacity and drought vulnerability: possible trade-offs and correlations with climate across three major biomes. Functional Ecology 28:810–818.
	Niinemets, Ü. 2001. Global-Scale Climatic Controls of Leaf Dry Mass Per Area, Density, and Thickness in Trees and Shrubs. Ecology 82:453–469.
	Niinemets, U., A. Portsmuth, D. Tena, M. Tobias, S. Matesanz, and F. Valladares. 2007. Do we underestimate the importance of leaf size in plant economics? Disproportional scaling of support costs within the spectrum of leaf physiognomy. Annals of Botany 100:283–303.
	Ofoe, R., R. H. Thomas, S. K. Asiedu, G. Wang-Pruski, B. Fofana, and Lord Abbey. 2023. Aluminum in plant: Benefits, toxicity and tolerance mechanisms. Frontiers in Plant Science 13.
	Rana, M. S., P. Bhantana, X. Sun, M. Imran, M. Shaaban, M. G. Moussa, M. H. Saleem, et al. 2020. Molybdenum as an Essential Element for Crops: An Overview. Biomedical Journal of Scientific & Technical Research 24:18535–18547.
	Rodríguez-Jiménez, T. de J., D. L. Ojeda-Barrios, F. Blanco-Macías, R. D. Valdez-Cepeda, and R. Parra-Quezada. 2016. Urease and nickel in plant physiology. Revista Chapingo Serie Horticultura 22.
	Rose, S. A., and L. Poorter. 2003. The importance of seed mass for early regeneration in tropical forest: a review. Long-term changes in tropical tree diversity: Studies from the Guiana Shield, Africa, Borneo and Melanesia.
	Rosell. 2016. Bark thickness across the angiosperms: more than just fire. New Phytologist - Wiley Online Library.
	Royer, D. L., L. Sack, P. Wilf, C. H. Lusk, G. J. Jordan, Ü. Niinemets, I. J. Wright, et al. 2007. Fossil leaf economics quantified: calibration, Eocene case study, and implications. Paleobiology 33:574–589.
	Sack, L., and T. N. Buckley. 2016. The Developmental Basis of Stomatal Density and Flux. Plant Physiology 171:2358–2363.
	2020. Trait Multi-Functionality in Plant Stress Response. Integrative and Comparative Biology 60:98–112.
	Sack, L., P. D. Cowan, N. Jaikumar, and N. M. Holbrook. 2003a. The ‘hydrology’ of leaves: co-ordination of structure and function in temperate woody species. Plant, Cell & Environment 26:1343–1356.
	Sack, L., P. J. Grubb, and T. Marañón. 2003b. The functional morphology of juvenile plants tolerant of strong summer drought in shaded forest understories in southern Spain. Plant Ecology 168:139–163.
	Sack, L., C. Scoffoni, A. D. McKown, K. Frole, M. Rawls, J. C. Havran, H. Tran, et al. 2012. Developmentally based scaling of leaf venation architecture explains global ecological patterns. Nature Communications 3:837.
	Salisbury, E. J. 1913. The Determining Factors in Petiolar Structure. New Phytologist 12:281–289.
	Sardans, J., and J. Peñuelas. 2021. Potassium Control of Plant Functions: Ecological and Agricultural Implications. Plants 10:419.
	Scoffoni, C., D. S. Chatelet, J. Pasquet-Kok, M. Rawls, M. J. Donoghue, E. J. Edwards, and L. Sack. 2016. Hydraulic basis for the evolution of photosynthetic productivity. Nature Plants 2:16072.
	Scoffoni, C., C. Vuong, S. Diep, H. Cochard, and L. Sack. 2014. Leaf shrinkage with dehydration: coordination with hydraulic vulnerability and drought tolerance. Plant Physiology 164:1772–1788.
	Seibt, U., A. Rajabi, H. Griffiths, and J. A. Berry. 2008. Carbon isotopes and water use efficiency: sense and sensitivity. Oecologia 155:441–454.
	Seleiman, M. F., N. Al-Suhaibani, N. Ali, M. Akmal, M. Alotaibi, Y. Refay, T. Dindaroglu, et al. 2021. Drought Stress Impacts on Plants and Different Approaches to Alleviate Its Adverse Effects. Plants 10:259.
	Vera-Maldonado, P., F. Aquea, M. Reyes-Díaz, P. Cárcamo-Fincheira, B. Soto-Cerda, A. Nunes-Nesi, and C. Inostroza-Blancheteau. 2024. Role of boron and its interaction with other elements in plants. Frontiers in Plant Science 15.
	Walker, A. P., T. Quaife, P. M. van Bodegom, M. G. De Kauwe, T. F. Keenan, J. Joiner, M. R. Lomas, et al. 2017. The impact of alternative trait-scaling hypotheses for the maximum photosynthetic carboxylation rate (Vcmax) on global gross primary production. New Phytologist 215:1370–1386.
	Wang, M., Q. Zheng, Q. Shen, and S. Guo. 2013. The Critical Role of Potassium in Plant Stress Response. International Journal of Molecular Sciences 14:7370–7390.
	Witkowski, E. T. F., and B. B. Lamont. 1991. Leaf specific mass confounds leaf density and thickness. Oecologia 88:486–493.
	Wright, I. J., N. Dong, V. Maire, I. C. Prentice, M. Westoby, S. Díaz, R. V. Gallagher, et al. 2017. Global climatic drivers of leaf size. Science 357:917–921.
	Wright, I. J., P. B. Reich, M. Westoby, D. D. Ackerly, Z. Baruch, F. Bongers, J. Cavender-Bares, et al. 2004. The worldwide leaf economics spectrum. Nature 428:821–827.
	Yang, N., F. Wu, L. Sack, J. I. Querejeta, L. A. Cernusak, T. Dong, W. Xu, et al. 2025. Leaf Elementomes Reveal Close Links With Leaf Water-Use Strategies Across Diverse Forest Ecosystems: Insights From Trait Coordination and Reflectance Spectroscopy. Plant, Cell & Environment n/a.
	Yong, Y., P. Huang, S. Xu, X. Yang, J. Bao, and Z. Zheng. 2025. Trade-Off Between Leaf Mass Area and Phosphorus Concentration Alters Resource-Use Strategy of Understory Plants Under Long-Term Nitrogen and Phosphorus Addition in a Subtropical Forest. Forests 16:319.
	Young, K. J., B. J. Brennan, R. Tagore, and G. W. Brudvig. 2015. Photosynthetic Water Oxidation: Insights from Manganese Model Chemistry. Accounts of Chemical Research 48:567–574.
	Zhang, Y.-J., K.-F. Cao, L. Sack, N. Li, X.-M. Wei, and G. Goldstein. 2015. Extending the generality of leaf economic design principles in the cycads, an ancient lineage. New Phytologist 206:817–829.

## Sheet: Table_S2
Table S2	Environmental variables used to estimate climate for 328 species-site combinations, including 246 unique woody species sampled from 16 ecosystems across a climatic gradient across the continental U.S.A and northern Mexico, including abbreviations, units, source database, metadata (raster layer title, timeframe of the dataset, the subset of the original dataset that was used to calculate species c…
Site	Site_code	Vegetation type	Lat, Lon	SampledSpecies	GSP	GST	GSPET	GSAI	MAT	MAP	MAAI	MAPET
Sweeney Granite Mountains Desert Research Center	SGMD	Desert	34.7813355,-115.6559781	28	122	8.675	541.8	0.228475	16.6383	262.6	0.09592	2738.4
Stunt Ranch Santa Monica Mountains Reserve	SRSM	Chaparral	34.0955321,-118.66148	26	391.6	12.9033	734.4	0.563973	16.3608	412.2	0.2138	1926.2
Centro de Investigación Científica y de Educación Superior de Ensenada	ENSE	Coastal Sage Scrub	31.869475,-116.666892	22	183	13.025	407.667	0.336819	16.4083	256.333	0.121	1588
Yosemite Forest Dynamics Plot	YFDP	Montane Wet Forest	37.8529772,-119.8312939	20	605.4	7.86667	720	1.08618	10.675	977.4	0.53906	1812.6
Onion Creek	OC	Mixed Riparian Woodland	39.274627,-120.3654455	19	136.75	9.75	441	0.33095	6.46146	1122.25	0.754875	1486
Smithsonian Conservation Biology Institute	SCBI	Mixed Evergreen-Deciduous Forest	38.89292,-78.1395	12	827.6	15.0889	1080.2	0.825724	11.5108	1037.8	0.84198	1232.2
Angelo Coast Range Reserve	ACRR	Mixed Evergreen-Deciduous Forest	39.7185431,-123.6550498	21	1556.8	8.85	641	3.3011	11.4317	1613.4	1.18092	1365.8
Smithsonian Environmental Research Center	SERC	Deciduous Forest	38.890131,-76.560014	22	859.8	16.7489	1187.8	0.7682	13.155	1103.4	0.81312	1356.4
Wind River Forest Dynamics Plot	WFDP	Evergreen Forest	45.82049,-121.95191	18	1086.4	10.7925	820.4	1.9589	9.05167	2005.8	1.85386	1081.4
Harvard Forest	HARV	Mixed Evergreen-Deciduous Forest	42.5369,-72.17266	26	656.25	13.8214	808.5	0.852464	7.00729	1105.5	1.10017	1004.25
San Joaquin Experimental Range	SJER	Shrubland_Evergreen Forest	37.10878,-119.73228	14	493.5	10.3292	569	1.03378	16.6135	551.75	0.260275	2118.75
Missouri Ozarks AmeriFlux	MOFL	Deciduous Forest	38.7441,-92.2	20	858	16.6222	1238.5	0.753481	12.4208	1013	0.737	1374
Ordway Swisher Biological Station	OSBS	Woody Wetlands_Evergreen Forest	29.68927,-81.99343	24	1296.75	20.4646	1625.25	0.802527	20.4708	1296.75	0.794075	1632.5
Rutgers University Pinelands Field Station	RPFS	Atlantic Coastal Pine Barrens	39.995534,-74.52301	18	895.4	15.26	1088.2	0.8971	11.6633	1159.4	0.93742	1236.4
Great Smoky Mountains National Park	GRSM	Deciduous Forest	35.68896,-83.50195	26	1163.6	14.616	1175.4	1.07518	12.7042	1392.6	1.07466	1295.2
Niwot Ridge Mountain Research Station	NIWO	Evergreen Forest	40.05425,-105.58237	12	218	8.575	616.4	0.35268	0.0391667	668.4	0.5557	1202.4
Environmental variables used to estimate climate for 328 species from 16 ecosystems across a climatic gradient across continental U.S.A and Mexico, including abbreviations, units, source database, metadata (raster layer title, timeframe of the dataset, the subset of the original dataset that was used to calculate species climate envelope, and the download date), and links to access datasets and r…
Environmental variable	Abbreviation	Units	Source	Raster layer name	Dataset timeframe	Analyzed timeframe	Download date:	Link	Reference
Mean annual temperature	MAT	°C	WorldClim	wc2.0_bio_30s_01.tif	1970-2000	1970-2000	2019-02-21	http://worldclim.org/version2	Fick, S.E. and R.J. Hijmans, 2017. Worldclim 2: New 1-km spatial resolution climate surfaces for global land areas. International Journal of Climatology.
Mean annual precipitation	MAP	mm year-1	WorldClim	wc2.0_bio_30s_12.tif	1970-2000	1970-2000	2019-02-21	http://worldclim.org/version2	Fick, S.E. and R.J. Hijmans, 2017. Worldclim 2: New 1-km spatial resolution climate surfaces for global land areas. International Journal of Climatology.
Potential evapotranspiration	MAPET	mm year-1	CGIAR-CSI Global-PET database	et0_yr.tif	1970-2000	1970-2000	2019-02-21	https://cgiarcsi.community/data/global-aridity-and-pet-database/	Zomer RJ, Trabucco A, Bossio DA, van Straaten O, Verchot LV, 2008. Climate Change Mitigation: A Spatial Analysis of Global Land Suitability for Clean Development Mechanism Afforestation and Reforestation. Agric. Ecosystems and Envir. 126: 67-80; Zomer RJ, Bossio DA, Trabucco A, Yuanjie L, Gupta DC & Singh VP, 2007. Trees and Water: Smallholder Agroforestry on Irrigated Lands in Northern India. Co…
Aridity index	MAAI	index	CGIAR-CSI Global-Aridity database	ai_et0.tif	1970-2000	1970-2000	2019-02-21	https://cgiarcsi.community/data/global-aridity-and-pet-database/	Zomer RJ, Trabucco A, Bossio DA, van Straaten O, Verchot LV, 2008. Climate Change Mitigation: A Spatial Analysis of Global Land Suitability for Clean Development Mechanism Afforestation and Reforestation. Agric. Ecosystems and Envir. 126: 67-80; Zomer RJ, Bossio DA, Trabucco A, Yuanjie L, Gupta DC & Singh VP, 2007. Trees and Water: Smallholder Agroforestry on Irrigated Lands in Northern India. Co…
Growing season temperature	GST	°C	WorldClim (monthly data)	tavg 30s	1970-2000	1970-2000	2019-02-21	https://www.worldclim.org/data/worldclim21.html	Fick, S.E. and R.J. Hijmans, 2017. Worldclim 2: New 1-km spatial resolution climate surfaces for global land areas. International Journal of Climatology.
Growing season precipitation	GSP	mm	WorldClim (monthly data)	prec 30s	1970-2000	1970-2000	2019-02-21	https://www.worldclim.org/data/worldclim21.html	Fick, S.E. and R.J. Hijmans, 2017. Worldclim 2: New 1-km spatial resolution climate surfaces for global land areas. International Journal of Climatology.
Growing season potential evapotranspiration	GSPET	mm	CGIAR-CSI Global-PET database	et0_yr.tif	1970-2000	1970-2000	2019-02-21	https://cgiarcsi.community/data/global-aridity-and-pet-database/	Zomer RJ, Trabucco A, Bossio DA, van Straaten O, Verchot LV, 2008. Climate Change Mitigation: A Spatial Analysis of Global Land Suitability for Clean Development Mechanism Afforestation and Reforestation. Agric. Ecosystems and Envir. 126: 67-80; Zomer RJ, Bossio DA, Trabucco A, Yuanjie L, Gupta DC & Singh VP, 2007. Trees and Water: Smallholder Agroforestry on Irrigated Lands in Northern India. Co…
Growing season aridity	GSAI	index	CGIAR-CSI Global-Aridity database	ai_et0.tif	1970-2000	1970-2000	2019-02-21	https://cgiarcsi.community/data/global-aridity-and-pet-database/	Zomer RJ, Trabucco A, Bossio DA, van Straaten O, Verchot LV, 2008. Climate Change Mitigation: A Spatial Analysis of Global Land Suitability for Clean Development Mechanism Afforestation and Reforestation. Agric. Ecosystems and Envir. 126: 67-80; Zomer RJ, Bossio DA, Trabucco A, Yuanjie L, Gupta DC & Singh VP, 2007. Trees and Water: Smallholder Agroforestry on Irrigated Lands in Northern India. Co…

## Sheet: Table_S3
Table_S3	List of 328 species-site combinations, including 246 unique woody species sampled from 16 ecosystems across the continental U.S.A and northern Mexico, and associated metadata, including site name and site code, species scientific name, species code (the first two letters of genus and species), vegetation type, and year of trait data collection.
Site	Site_code	Species	Species_Code	Vegetation type	Year_collected		Trait	Number_of_Species
GraniteMountains	SGMD	Acamptopappus sphaerocephalus	ACSP	Desert	2016		e_avg_um2	227
GraniteMountains	SGMD	Ambrosia salsola	AMSA	Desert	2016		s_avg_um2	228
GraniteMountains	SGMD	Artemisia dracunculus	ARDR	Desert	2016		d_sum_sto.mm.2	229
GraniteMountains	SGMD	Artemisia ludoviciana	ARLU	Desert	2016		gmax_sum_mol.m.2.s.1	226
GraniteMountains	SGMD	Chilopsis linearis	CHLI	Desert	2016		t_avg_tri.mm.2	230
GraniteMountains	SGMD	Cleomella arborea	CLAR	Desert	2016		SR_unitless	229
GraniteMountains	SGMD	Coleogyne ramosissima	CORA	Desert	2016		LA_cm2	243
GraniteMountains	SGMD	Ephedra californica	EPCA	Desert	2016		LMA_g.m.2	243
GraniteMountains	SGMD	Ephedra nevadensis	EPNE	Desert	2016		LTH_mm	243
GraniteMountains	SGMD	Ericameria cooperi	ERCO	Desert	2016		LD_g.cm.3	243
GraniteMountains	SGMD	Ericameria cuneata	ERCU	Desert	2016		LDMC_g.g.1	243
GraniteMountains	SGMD	Ericameria linearifolia	ERLI	Desert	2016		SWC_g.g.1	243
GraniteMountains	SGMD	Eriogonum fasciculatum	ERFA	Desert	2016		SWMA_g.m.2	243
GraniteMountains	SGMD	Gutierrezia microcephala	GUMI	Desert	2016		PLAdry_.	238
GraniteMountains	SGMD	Larrea tridentata	LATR	Desert	2016		PLTHdry_.	215
GraniteMountains	SGMD	Lycium cooperi	LYCO	Desert	2016		PA_LA	201
GraniteMountains	SGMD	Menodora spinescens	MESP	Desert	2016		PA.Drymass_cm2.g.1	201
GraniteMountains	SGMD	Ottleya rigida	OTRI	Desert	2016		PMA_g.cm.2	183
GraniteMountains	SGMD	Prunus fasciculata	PRFA	Desert	2016		WD_g.cm.3	245
GraniteMountains	SGMD	Rhamnus crocea subsp. ilicifolia	RHCRIL	Desert	2016		HuberValue_unitless	102
GraniteMountains	SGMD	Rhus trilobata	RHTR	Desert	2016		BarkThicknessStemDiameterRatio	222
GraniteMountains	SGMD	Salvia dorrii	SADO	Desert	2016		Cmass_mg.g.1	241
GraniteMountains	SGMD	Salvia mohavensis	SAMO	Desert	2016		Narea_g.m.2	240
GraniteMountains	SGMD	Scutellaria mexicana	SCME	Desert	2016		Nmass_mg.g.1	241
GraniteMountains	SGMD	Senecio flaccidus	SEFL	Desert	2016		Parea_g.m.2	234
GraniteMountains	SGMD	Senna armata	SEAR	Desert	2016		Pmass_mg.g.1	235
GraniteMountains	SGMD	Thamnosma montana	THMO	Desert	2016		Kmass_mg.g.1	235
GraniteMountains	SGMD	Yucca schidigera	YUSC	Desert	2016		Camass_mg.g.1	235
StuntRanch	SRSM	Adenostoma fasciculatum	ADFA	Chaparral	2016		Mgmass_mg.g.1	235
StuntRanch	SRSM	Arctostaphylos pungens	ARPU	Chaparral	2016		Femass_mg.g.1	235
StuntRanch	SRSM	Artemisia californica	ARCA	Chaparral	2017		Bmass_mg.g.1	235
StuntRanch	SRSM	Baccharis pilularis	BAPI	Chaparral	2017		Mnmass_mg.g.1	235
StuntRanch	SRSM	Baccharis salicina	BASA	Chaparral	2017		Namass_mg.g.1	235
StuntRanch	SRSM	Ceanothus spinosus	CESP	Chaparral	2016		Znmass_mg.g.1	235
StuntRanch	SRSM	Cercocarpus betuloides	CEBE	Chaparral	2016_2017		Cumass_mg.g.1	235
StuntRanch	SRSM	Diplacus aurantiacus	DIAU	Chaparral	2017		Momass_mg.g.1	235
StuntRanch	SRSM	Epilobium canum	EPCA	Chaparral	2017		Comass_mg.g.1	235
StuntRanch	SRSM	Eriogonum fasciculatum	ERFA	Chaparral	2016_2017		Almass_mg.g.1	235
StuntRanch	SRSM	Eriophyllum confertiflorum	ERCO	Chaparral	2017		Asmass_mg.g.1	235
StuntRanch	SRSM	Fraxinus dipetala	FRDI	Chaparral	2017		Cdmass_mg.g.1	235
StuntRanch	SRSM	Hazardia squarrosa	HASQ	Chaparral	2017		Rbmass_mg.g.1	235
StuntRanch	SRSM	Heteromeles arbutifolia	HEAR	Chaparral	2016		Srmass_mg.g.1	235
StuntRanch	SRSM	Malacothamnus fasciculatus	MAFA	Chaparral	2017		Semass_mg.g.1	140
StuntRanch	SRSM	Malosma laurina	MALA	Chaparral	2016		Nimass_mg.g.1	140
StuntRanch	SRSM	Prunus ilicifolia	PRIL	Chaparral	2017		Chlarea_SPAD	228
StuntRanch	SRSM	Quercus agrifolia	QUAG	Chaparral	2016		N_P	235
StuntRanch	SRSM	Quercus berberidifolia	QUBE	Chaparral	2016_2017		C_N	240
StuntRanch	SRSM	Rhus ovata	RHOV	Chaparral	2017		SPAD_Narea	227
StuntRanch	SRSM	Rhus trilobata	RHTR	Chaparral	2017		D13C_permil	241
StuntRanch	SRSM	Salix exigua	SAEX	Chaparral	2017		TLP_.MPa	243
StuntRanch	SRSM	Salvia leucophylla	SALE	Chaparral	2016		K0.1_mmol.m.2.s.1.MPa.1	27
StuntRanch	SRSM	Salvia mellifera	SAME	Chaparral	2016		psi_K0.1_80_.Mpa	27
StuntRanch	SRSM	Sambucus nigra	SANI	Chaparral	2017		Jmax_area_umol.m.2.s.1	32
StuntRanch	SRSM	Trichostema lanatum	TRLA	Chaparral	2017		Vcmax_area_umol.m.2.s.1	37
Ensenada	ENSE	Acalypha californica	ACCA	Coastal sage scrub	2017		gc_mod_mol.m.2.s.1	234
Ensenada	ENSE	Adenostoma fasciculatum	ADFA	Coastal sage scrub	2017		gc_gmax	217
Ensenada	ENSE	Aesculus parryi	AEPA	Coastal sage scrub	2017		gmax_Narea_mol.g.1.s.1	223
Ensenada	ENSE	Artemisia californica	ARCA	Coastal sage scrub	2017		HmaxTRY_m	212
Ensenada	ENSE	Baccharis sarothroides	BASA	Coastal sage scrub	2017		SeedMassTRY_mg	218
Ensenada	ENSE	Bahiopsis laciniata	BALA	Coastal sage scrub	2017		GSAI	244
Ensenada	ENSE	Cleomella arborea	CLAR	Coastal sage scrub	2017		GSPET	244
Ensenada	ENSE	Cneoridium dumosum	CNDU	Coastal sage scrub	2017		GSppt	244
Ensenada	ENSE	Encelia californica	ENCA	Coastal sage scrub	2017		GStavg	244
Ensenada	ENSE	Eriodictyon californicum	ERCA	Coastal sage scrub	2017		AI_mean	245
Ensenada	ENSE	Eriogonum fasciculatum	ERFA	Coastal sage scrub	2017		PET_mean	245
Ensenada	ENSE	Fraxinus dipetala	FRDI	Coastal sage scrub	2017		MAT_mean	245
Ensenada	ENSE	Hazardia berberidis	HABE	Coastal sage scrub	2017		MAP_mean	245
Ensenada	ENSE	Malacothamnus fasciculatus	MAFA	Coastal sage scrub	2017
Ensenada	ENSE	Malosma laurina	MALA	Coastal sage scrub	2017
Ensenada	ENSE	Mirabilis laevis	MILA	Coastal sage scrub	2017
Ensenada	ENSE	Quercus agrifolia	QUAG	Coastal sage scrub	2017
Ensenada	ENSE	Rhus integrifolia	RHIN	Coastal sage scrub	2017
Ensenada	ENSE	Romneya trichocalyx	ROTR	Coastal sage scrub	2017
Ensenada	ENSE	Sambucus nigra	SANI	Coastal sage scrub	2017
Ensenada	ENSE	Simmondsia chinensis	SICH	Coastal sage scrub	2017
Ensenada	ENSE	Verbesina dissita	VEDI	Coastal sage scrub	2017
Yosemite	YFDP	Abies concolor	ABCO	MontaneWetForest	2017
Yosemite	YFDP	Arctostaphylos patula	ARPA	MontaneWetForest	2017
Yosemite	YFDP	Calocedrus decurrens	CADE	MontaneWetForest	2017
Yosemite	YFDP	Ceanothus cordulatus	CECO	MontaneWetForest	2017
Yosemite	YFDP	Ceanothus integerrimus	CEIN	MontaneWetForest	2017
Yosemite	YFDP	Ceanothus parvifolius	CEPA	MontaneWetForest	2017
Yosemite	YFDP	Chamaebatia foliolosa	CHFO	MontaneWetForest	2017
Yosemite	YFDP	Chrysolepis sempervirens	CHSE	MontaneWetForest	2017
Yosemite	YFDP	Corylus cornuta	COCO	MontaneWetForest	2017
Yosemite	YFDP	Leucothoe davisiae	LEDA	MontaneWetForest	2017
Yosemite	YFDP	Pinus lambertiana	PILA	MontaneWetForest	2017
Yosemite	YFDP	Pinus ponderosa	PIPO	MontaneWetForest	2017
Yosemite	YFDP	Prunus emarginata	PREM	MontaneWetForest	2017
Yosemite	YFDP	Ribes nevadense	RINE	MontaneWetForest	2017
Yosemite	YFDP	Ribes roezlii	RIRO	MontaneWetForest	2017
Yosemite	YFDP	Rosa bridgesii	ROBR	MontaneWetForest	2017
Yosemite	YFDP	Rubus parviflorus	RUPA	MontaneWetForest	2017
Yosemite	YFDP	Salix scouleriana	SASC	MontaneWetForest	2017
Yosemite	YFDP	Symphoricarpos mollis	SYMO	MontaneWetForest	2017
Yosemite	YFDP	Vaccinium uliginosum	VAUL	MontaneWetForest	2017
OnionCreek	OC	Abies magnifica	ABMA	Mixed Riparian Woodland	2018
OnionCreek	OC	Alnus incana	ALIN	Mixed Riparian Woodland	2018
OnionCreek	OC	Arctostaphylos nevadensis	ARNE	Mixed Riparian Woodland	2018
OnionCreek	OC	Arctostaphylos patula	ARPA	Mixed Riparian Woodland	2018
OnionCreek	OC	Calocedrus decurrens	CADE	Mixed Riparian Woodland	2018
OnionCreek	OC	Ceanothus cordulatus	CECO	Mixed Riparian Woodland	2018
OnionCreek	OC	Ceanothus integerrimus	CEIN	Mixed Riparian Woodland	2018
OnionCreek	OC	Ceanothus velutinus	CEVE	Mixed Riparian Woodland	2018
OnionCreek	OC	Juniperus occidentalis	JUOC	Mixed Riparian Woodland	2018
OnionCreek	OC	Pinus albicaulis	PIAL	Mixed Riparian Woodland	2018
OnionCreek	OC	Pinus contorta	PICO	Mixed Riparian Woodland	2018
OnionCreek	OC	Pinus jeffreyi	PIJE	Mixed Riparian Woodland	2018
OnionCreek	OC	Populus fremontii	POFR	Mixed Riparian Woodland	2018
OnionCreek	OC	Populus tremuloides	POTR	Mixed Riparian Woodland	2018
OnionCreek	OC	Prunus emarginata	PREM	Mixed Riparian Woodland	2018
OnionCreek	OC	Quercus vaccinifolia	QUVA	Mixed Riparian Woodland	2018
OnionCreek	OC	Ribes roezlii	RIRO	Mixed Riparian Woodland	2018
OnionCreek	OC	Rubus parviflorus	RUPA	Mixed Riparian Woodland	2018
OnionCreek	OC	Sambucus racemosa var. microbotrys	SARAMI	Mixed Riparian Woodland	2018
AngeloCoast	ACRR	Acer macrophyllum	ACMA	Mixed conifer-broad-leaf forest	2018
AngeloCoast	ACRR	Aesculus californica	AECA	Mixed conifer-broad-leaf forest	2018
AngeloCoast	ACRR	Alnus rhombifolia	ALRH	Mixed conifer-broad-leaf forest	2018
AngeloCoast	ACRR	Arbutus menziesii	ARME	Mixed conifer-broad-leaf forest	2018
AngeloCoast	ACRR	Arctostaphylos manzanita	ARMA	Mixed conifer-broad-leaf forest	2018
AngeloCoast	ACRR	Ceanothus cuneatus	CECU	Mixed conifer-broad-leaf forest	2018
AngeloCoast	ACRR	Ceanothus incanus	CEIN	Mixed conifer-broad-leaf forest	2018
AngeloCoast	ACRR	Cornus nuttalii	CONU	Mixed conifer-broad-leaf forest	2018
AngeloCoast	ACRR	Corylus cornuta	COCO	Mixed conifer-broad-leaf forest	2018
AngeloCoast	ACRR	Frangula californica	FRCA	Mixed conifer-broad-leaf forest	2018
AngeloCoast	ACRR	Fraxinus latifolia	FRLA	Mixed conifer-broad-leaf forest	2018
AngeloCoast	ACRR	Holodiscus discolor	HODI	Mixed conifer-broad-leaf forest	2018
AngeloCoast	ACRR	Notholithocarpus densiflorus	NODE	Mixed conifer-broad-leaf forest	2018
AngeloCoast	ACRR	Pseudotsuga menziesii	PSME	Mixed conifer-broad-leaf forest	2018
AngeloCoast	ACRR	Quercus chrysolepis	QUCH	Mixed conifer-broad-leaf forest	2018
AngeloCoast	ACRR	Quercus garryana	QUGA	Mixed conifer-broad-leaf forest	2018
AngeloCoast	ACRR	Quercus wislizeni var. frutescens	QUWIFR	Mixed conifer-broad-leaf forest	2018
AngeloCoast	ACRR	Rubus leucodermis	RULE	Mixed conifer-broad-leaf forest	2018
AngeloCoast	ACRR	Sequoia sempervirens	SESE	Mixed conifer-broad-leaf forest	2018
AngeloCoast	ACRR	Umbellularia californica	UMCA	Mixed conifer-broad-leaf forest	2018
AngeloCoast	ACRR	Vaccinium ovatum	VAOV	Mixed conifer-broad-leaf forest	2018
SCBI	SCBI	Carya alba	CAAL	MixedEvergreenDeciduousForest	2018
SCBI	SCBI	Carya cordiformis	CACO	MixedEvergreenDeciduousForest	2018
SCBI	SCBI	Carya glabra	CAGL	MixedEvergreenDeciduousForest	2018
SCBI	SCBI	Carya glabra var. odorata	CAGLOD	MixedEvergreenDeciduousForest	2018
SCBI	SCBI	Fagus grandifolia	FAGR	MixedEvergreenDeciduousForest	2018
SCBI	SCBI	Fraxinus americana	FRAM	MixedEvergreenDeciduousForest	2018
SCBI	SCBI	Juglans nigra	JUNI	MixedEvergreenDeciduousForest	2018
SCBI	SCBI	Liriodendron tulipifera	LITU	MixedEvergreenDeciduousForest	2018
SCBI	SCBI	Quercus alba	QUAL	MixedEvergreenDeciduousForest	2018
SCBI	SCBI	Quercus michauxii	QUMI	MixedEvergreenDeciduousForest	2018
SCBI	SCBI	Quercus rubra	QURU	MixedEvergreenDeciduousForest	2018
SCBI	SCBI	Quercus velutina	QUVE	MixedEvergreenDeciduousForest	2018
WindRiver	WFDP	Abies amabilis	ABAM	EvergreenForest	2019
WindRiver	WFDP	Abies grandis	ABGR	EvergreenForest	2019
WindRiver	WFDP	Acer circinatum	ACCI	EvergreenForest	2019
WindRiver	WFDP	Alnus rubra	ALRU	EvergreenForest	2019
WindRiver	WFDP	Amelanchier alnifolia	AMAL	EvergreenForest	2019
WindRiver	WFDP	Cornus nuttallii	CONU	EvergreenForest	2019
WindRiver	WFDP	Corylus cornuta subsp. californica	COCOCA	EvergreenForest	2019
WindRiver	WFDP	Gaultheria shallon	GASH	EvergreenForest	2019
WindRiver	WFDP	Holodiscus discolor	HODI	EvergreenForest	2019
WindRiver	WFDP	Pseudotsuga menziesii	PSME	EvergreenForest	2019
WindRiver	WFDP	Rhododendron macrophyllum	RHMA	EvergreenForest	2019
WindRiver	WFDP	Rhododendron menziesii	RHME	EvergreenForest	2019
WindRiver	WFDP	Rubus spectabilis	RUSP	EvergreenForest	2019
WindRiver	WFDP	Taxus brevifolia	TABR	EvergreenForest	2019
WindRiver	WFDP	Thuja plicata	THPL	EvergreenForest	2019
WindRiver	WFDP	Tsuga heterophylla	TSHE	EvergreenForest	2019
WindRiver	WFDP	Vaccinium ovalifolium	VAOV	EvergreenForest	2019
WindRiver	WFDP	Vaccinium parvifolium	VAPA	EvergreenForest	2019
SERC	SERC	Acer rubrum	ACRU	DeciduousForest	2019
SERC	SERC	Asimina triloba	ASTR	DeciduousForest	2019
SERC	SERC	Carpinus caroliniana	CACA	DeciduousForest	2019
SERC	SERC	Carya alba	CAAL	DeciduousForest	2019
SERC	SERC	Carya cordiformis	CACO	DeciduousForest	2019
SERC	SERC	Carya glabra	CAGL	DeciduousForest	2019
SERC	SERC	Cornus florida	COFL	DeciduousForest	2019
SERC	SERC	Fagus grandifolia	FAGR	DeciduousForest	2019
SERC	SERC	Fraxinus americana	FRAM	DeciduousForest	2019
SERC	SERC	Fraxinus pennsylvanica	FRPE	DeciduousForest	2019
SERC	SERC	Lindera benzoin	LIBE	DeciduousForest	2019
SERC	SERC	Liquidambar styraciflua	LIST	DeciduousForest	2019
SERC	SERC	Liriodendron tulipifera	LITU	DeciduousForest	2019
SERC	SERC	Nyssa sylvatica	NYSY	DeciduousForest	2019
SERC	SERC	Platanus occidentalis	PLOC	DeciduousForest	2019
SERC	SERC	Quercus alba	QUAL	DeciduousForest	2019
SERC	SERC	Quercus falcata	QUFA	DeciduousForest	2019
SERC	SERC	Quercus michauxii	QUMI	DeciduousForest	2019
SERC	SERC	Quercus palustris	QUPA	DeciduousForest	2019
SERC	SERC	Quercus rubra	QURU	DeciduousForest	2019
SERC	SERC	Quercus velutina	QUVE	DeciduousForest	2019
SERC	SERC	Ulmus rubra	ULRU	DeciduousForest	2019
HarvardForest	HARV	Acer pensylvanicum	ACPE	MixedEvergreenDeciduousForest	2021
HarvardForest	HARV	Acer rubrum	ACRU	MixedEvergreenDeciduousForest	2021
HarvardForest	HARV	Acer saccharum	ACSA	MixedEvergreenDeciduousForest	2021
HarvardForest	HARV	Amelanchier laevis	AMLA	MixedEvergreenDeciduousForest	2021
HarvardForest	HARV	Betula alleghaniensis	BEAL	MixedEvergreenDeciduousForest	2021
HarvardForest	HARV	Betula lenta	BELE	MixedEvergreenDeciduousForest	2021
HarvardForest	HARV	Betula papyrifera	BEPA	MixedEvergreenDeciduousForest	2021
HarvardForest	HARV	Castanea dentata	CADE	MixedEvergreenDeciduousForest	2021
HarvardForest	HARV	Fagus grandifolia	FAGR	MixedEvergreenDeciduousForest	2021
HarvardForest	HARV	Fagus sylvatica	FASY	MixedEvergreenDeciduousForest	2021
HarvardForest	HARV	Fraxinus americana	FRAM	MixedEvergreenDeciduousForest	2021
HarvardForest	HARV	Hamamelis virginiana	HAVI	MixedEvergreenDeciduousForest	2021
HarvardForest	HARV	Ilex mucronata	ILMU	MixedEvergreenDeciduousForest	2021
HarvardForest	HARV	Ilex verticillata	ILVE	MixedEvergreenDeciduousForest	2021
HarvardForest	HARV	Kalmia latifolia	KALA	MixedEvergreenDeciduousForest	2021
HarvardForest	HARV	Lyonia ligustrina	LYLI	MixedEvergreenDeciduousForest	2021
HarvardForest	HARV	Nyssa sylvatica	NYSY	MixedEvergreenDeciduousForest	2021
HarvardForest	HARV	Ostrya virginiana	OSVI	MixedEvergreenDeciduousForest	2021
HarvardForest	HARV	Picea abies	PIAB	MixedEvergreenDeciduousForest	2021
HarvardForest	HARV	Pinus resinosa	PIRE	MixedEvergreenDeciduousForest	2021
HarvardForest	HARV	Pinus strobus	PIST	MixedEvergreenDeciduousForest	2021
HarvardForest	HARV	Prunus serotina	PRSE	MixedEvergreenDeciduousForest	2021
HarvardForest	HARV	Quercus rubra	QURU	MixedEvergreenDeciduousForest	2021
HarvardForest	HARV	Rhododendron prinophyllum	RHPR	MixedEvergreenDeciduousForest	2021
HarvardForest	HARV	Tsuga canadensis	TSCA	MixedEvergreenDeciduousForest	2021
HarvardForest	HARV	Vaccinium corymbosum	VACO	MixedEvergreenDeciduousForest	2021
OSBS	OSBS	Asimina incana	ASIN	WoodyWetlands_EvergreenForest	2022
OSBS	OSBS	Carya glabra	CAGL	WoodyWetlands_EvergreenForest	2022
OSBS	OSBS	Ceratiola ericoides	CEER	WoodyWetlands_EvergreenForest	2022
OSBS	OSBS	Diospyros virginiana	DIVI	WoodyWetlands_EvergreenForest	2022
OSBS	OSBS	Geobalanus oblongifolius	GEOB	WoodyWetlands_EvergreenForest	2022
OSBS	OSBS	Ilex cassine	ILCA	WoodyWetlands_EvergreenForest	2022
OSBS	OSBS	Ilex glabra	ILGL	WoodyWetlands_EvergreenForest	2022
OSBS	OSBS	Lyonia lucida	LYLU	WoodyWetlands_EvergreenForest	2022
OSBS	OSBS	Persea palustris	PEPA	WoodyWetlands_EvergreenForest	2022
OSBS	OSBS	Pinus clausa	PICL	WoodyWetlands_EvergreenForest	2022
OSBS	OSBS	Pinus palustris	PIPA	WoodyWetlands_EvergreenForest	2022
OSBS	OSBS	Pinus taeda	PITA	WoodyWetlands_EvergreenForest	2022
OSBS	OSBS	Prunus umbellata	PRUM	WoodyWetlands_EvergreenForest	2022
OSBS	OSBS	Quercus geminata	QUGE	WoodyWetlands_EvergreenForest	2022
OSBS	OSBS	Quercus hemisphaerica	QUHE	WoodyWetlands_EvergreenForest	2022
OSBS	OSBS	Quercus laevis	QULA	WoodyWetlands_EvergreenForest	2022
OSBS	OSBS	Quercus margarettae	QUMA	WoodyWetlands_EvergreenForest	2022
OSBS	OSBS	Quercus nigra	QUNI	WoodyWetlands_EvergreenForest	2022
OSBS	OSBS	Quercus virginiana	QUVI	WoodyWetlands_EvergreenForest	2022
OSBS	OSBS	Serenoa repens	SERE	WoodyWetlands_EvergreenForest	2022
OSBS	OSBS	Vaccinium arboreum	VAAR	WoodyWetlands_EvergreenForest	2022
OSBS	OSBS	Vaccinium myrsinites	VAMY	WoodyWetlands_EvergreenForest	2022
OSBS	OSBS	Vaccinium stamineum	VAST	WoodyWetlands_EvergreenForest	2022
OSBS	OSBS	Vitis rotundifolia	VIRO	WoodyWetlands_EvergreenForest	2022
SJER	SJER	Aesculus californica	AECA	Shrubland_EvergreenForest	2022
SJER	SJER	Arctostaphylos viscida subsp. Mariposa	ARVIMA	Shrubland_EvergreenForest	2022
SJER	SJER	Ceanothus cuneatus	CECU	Shrubland_EvergreenForest	2022
SJER	SJER	Ceanothus leucodermis	CELE	Shrubland_EvergreenForest	2022
SJER	SJER	Datura wrightii	DAWR	Shrubland_EvergreenForest	2022
SJER	SJER	Frangula californica	FRCA	Shrubland_EvergreenForest	2022
SJER	SJER	Lupinus albifrons	LUAL	Shrubland_EvergreenForest	2022
SJER	SJER	Pinus sabiniana	PISA	Shrubland_EvergreenForest	2022
SJER	SJER	Quercus douglasii	QUDO	Shrubland_EvergreenForest	2022
SJER	SJER	Quercus wislizeni	QUWI	Shrubland_EvergreenForest	2022
SJER	SJER	Rhamnus crocea subsp. ilicifolia	RHCRIL	Shrubland_EvergreenForest	2022
SJER	SJER	Salix laevigata	SALA	Shrubland_EvergreenForest	2022
SJER	SJER	Sambucus cerulea	SACE	Shrubland_EvergreenForest	2022
SJER	SJER	Senecio flaccidus	SEFL	Shrubland_EvergreenForest	2022
MOFLUX	MOFL	Acer saccharum	ACSA	TemperateDeciduousForest	2022
MOFLUX	MOFL	Carya cordiformis	CACO	TemperateDeciduousForest	2022
MOFLUX	MOFL	Carya ovata	CAOV	TemperateDeciduousForest	2022
MOFLUX	MOFL	Celtis occidentalis	CEOC	TemperateDeciduousForest	2022
MOFLUX	MOFL	Cornus florida	COFL	TemperateDeciduousForest	2022
MOFLUX	MOFL	Fraxinus americana	FRAM	TemperateDeciduousForest	2022
MOFLUX	MOFL	Fraxinus pennsylvannica	FRPE	TemperateDeciduousForest	2022
MOFLUX	MOFL	Fraxinus quadrangulata	FRQU	TemperateDeciduousForest	2022
MOFLUX	MOFL	Juglans nigra	JUNI	TemperateDeciduousForest	2022
MOFLUX	MOFL	Juniperus virginiana	JUVI	TemperateDeciduousForest	2022
MOFLUX	MOFL	Ostrya virginiana	OSVI	TemperateDeciduousForest	2022
MOFLUX	MOFL	Prunus serrotina	PRSE	TemperateDeciduousForest	2022
MOFLUX	MOFL	Quercus alba	QUAL	TemperateDeciduousForest	2022
MOFLUX	MOFL	Quercus imbricaria	QUIM	TemperateDeciduousForest	2022
MOFLUX	MOFL	Quercus muehlenbergii	QUMU	TemperateDeciduousForest	2022
MOFLUX	MOFL	Quercus rubra	QURU	TemperateDeciduousForest	2022
MOFLUX	MOFL	Quercus shumardii	QUSH	TemperateDeciduousForest	2022
MOFLUX	MOFL	Quercus stellata	QUST	TemperateDeciduousForest	2022
MOFLUX	MOFL	Quercus velutina	QUVE	TemperateDeciduousForest	2022
MOFLUX	MOFL	Ulmus rubra	ULRU	TemperateDeciduousForest	2022
PinelandsFieldStation	PFS	Clethra alnifolia	CLAL	AtlanticCoastalPineBarrens	2022
PinelandsFieldStation	PFS	Comptonia peregrina	COPE	AtlanticCoastalPineBarrens	2022
PinelandsFieldStation	PFS	Gaylussacia baccata	GABA	AtlanticCoastalPineBarrens	2022
PinelandsFieldStation	PFS	Ilex glabra	ILGL	AtlanticCoastalPineBarrens	2022
PinelandsFieldStation	PFS	Kalmia latifolia	KALA	AtlanticCoastalPineBarrens	2022
PinelandsFieldStation	PFS	Pinus echinata	PIEC	AtlanticCoastalPineBarrens	2022
PinelandsFieldStation	PFS	Pinus rigida	PIRI	AtlanticCoastalPineBarrens	2022
PinelandsFieldStation	PFS	Pinus virginiana	PIVI	AtlanticCoastalPineBarrens	2022
PinelandsFieldStation	PFS	Quercus alba	QUAL	AtlanticCoastalPineBarrens	2022
PinelandsFieldStation	PFS	Quercus coccinea	QUCO	AtlanticCoastalPineBarrens	2022
PinelandsFieldStation	PFS	Quercus ilicifolia	QUIL	AtlanticCoastalPineBarrens	2022
PinelandsFieldStation	PFS	Quercus marilandica	QUMA	AtlanticCoastalPineBarrens	2022
PinelandsFieldStation	PFS	Quercus michauxii	QUMI	AtlanticCoastalPineBarrens	2022
PinelandsFieldStation	PFS	Quercus stellata	QUST	AtlanticCoastalPineBarrens	2022
PinelandsFieldStation	PFS	Quercus velutina	QUVE	AtlanticCoastalPineBarrens	2022
PinelandsFieldStation	PFS	Smilax rotundifolia	SMRO	AtlanticCoastalPineBarrens	2022
PinelandsFieldStation	PFS	Vaccinium corymbosum	VACO	AtlanticCoastalPineBarrens	2022
PinelandsFieldStation	PFS	Vaccinium pallidum	VAPA	AtlanticCoastalPineBarrens	2022
GreatSmokyMountainsReserve	GRSM	Acer pensylvanicum	ACPE	TemperateDeciduousForest	2023
GreatSmokyMountainsReserve	GRSM	Acer rubrum	ACRU	TemperateDeciduousForest	2023
GreatSmokyMountainsReserve	GRSM	Acer saccharum	ACSA	TemperateDeciduousForest	2023
GreatSmokyMountainsReserve	GRSM	Betula lenta	BELE	TemperateDeciduousForest	2023
GreatSmokyMountainsReserve	GRSM	Calycanthus floridus	CAFL	TemperateDeciduousForest	2023
GreatSmokyMountainsReserve	GRSM	Carpinus caroliniana	CACA	TemperateDeciduousForest	2023
GreatSmokyMountainsReserve	GRSM	Castanea dentata	CADE	TemperateDeciduousForest	2023
GreatSmokyMountainsReserve	GRSM	Cornus florida	COFL	TemperateDeciduousForest	2023
GreatSmokyMountainsReserve	GRSM	Fraxinus americana	FRAM	TemperateDeciduousForest	2023
GreatSmokyMountainsReserve	GRSM	Halesia carolina	HACA	TemperateDeciduousForest	2023
GreatSmokyMountainsReserve	GRSM	Ilex opaca	ILOP	TemperateDeciduousForest	2023
GreatSmokyMountainsReserve	GRSM	Juglans nigra	JUNI	TemperateDeciduousForest	2023
GreatSmokyMountainsReserve	GRSM	Lindera benzoin	LIBE	TemperateDeciduousForest	2023
GreatSmokyMountainsReserve	GRSM	Liriodendron tulipifera	LITU	TemperateDeciduousForest	2023
GreatSmokyMountainsReserve	GRSM	Magnolia tripetala	MATR	TemperateDeciduousForest	2023
GreatSmokyMountainsReserve	GRSM	Oxydendrum arboreum	OXAR	TemperateDeciduousForest	2023
GreatSmokyMountainsReserve	GRSM	Platanus occidentalis	PLOC	TemperateDeciduousForest	2023
GreatSmokyMountainsReserve	GRSM	Prunus serotina	PRSE	TemperateDeciduousForest	2023
GreatSmokyMountainsReserve	GRSM	Quercus rubra	QURU	TemperateDeciduousForest	2023
GreatSmokyMountainsReserve	GRSM	Rhododendron maximum	RHMA	TemperateDeciduousForest	2023
GreatSmokyMountainsReserve	GRSM	Rhus typhina	RHTY	TemperateDeciduousForest	2023
GreatSmokyMountainsReserve	GRSM	Robinia pseudoacacia	ROPS	TemperateDeciduousForest	2023
GreatSmokyMountainsReserve	GRSM	Sassafras albidum	SAAL	TemperateDeciduousForest	2023
GreatSmokyMountainsReserve	GRSM	Tilia americana	TIAM	TemperateDeciduousForest	2023
GreatSmokyMountainsReserve	GRSM	Tsuga canadensis	TSCA	TemperateDeciduousForest	2023
GreatSmokyMountainsReserve	GRSM	Ulmus rubra	ULRU	TemperateDeciduousForest	2023
NIWOT	NIWO	Abies lasiocarpa	ABLA	Subalpine Forest	2023
NIWOT	NIWO	Dasiphora fruticosa ssp. floribunda	DAFR	Subalpine Forest	2023
NIWOT	NIWO	Juniperus communis	JUCO	Subalpine Forest	2023
NIWOT	NIWO	Lonicera involucrata	LOIN	Subalpine Forest	2023
NIWOT	NIWO	Picea engelmannii	PIEN	Subalpine Forest	2023
NIWOT	NIWO	Pinus contorta	PICO	Subalpine Forest	2023
NIWOT	NIWO	Pinus flexilis	PIFL	Subalpine Forest	2023
NIWOT	NIWO	Populus tremuloides	POTR	Subalpine Forest	2023
NIWOT	NIWO	Ribes montigenum	RIMO	Subalpine Forest	2023
NIWOT	NIWO	Rubus idaeus ssp melanolasius	RUID	Subalpine Forest	2023
NIWOT	NIWO	Salix sp.	SASP	Subalpine Forest	2023
NIWOT	NIWO	Vaccinium myrtillus	VAMY	Subalpine Forest	2023

## Sheet: Table_S4
Table_S4	Results of analyses of variance for 59 plant traits for 328 species-site combinations, including 246 unique woody species sampled from 16 ecosystems across the continental U.S.A and northern Mexico. Values in each cell represent sum of squares degrees of freedom, p-values, and percent of variance explained. Analyses of variance were conducted (A) testing the significance of variation across speci…
Trait	Across species	Within species (error)		Site	Species (within-site variance)	Error (within-species variance)
e_avg_um2	5.584, 228, 2.71e-14, 95%	0.009, 71, 5%		0.107, 15, 0.003, 14%	0.045, 213, 0, 84%	0.012, 14, 1%
s_avg_um2	4.502, 229, 9.04e-12, 94%	0.01, 71, 6%		0.074, 15, 0.034, 11%	0.041, 214, 0, 88%	0.009, 14, 1%
d_sum_sto.mm.2	4.281, 230, 3.31e-11, 93%	0.015, 71, 7%		0.218, 15, 0, 21%	0.055, 215, 0, 76%	0.027, 14, 2%
gmax_sum_mol.m.2.s.1	4.037, 227, 1.97e-10, 93%	0.015, 70, 7%		0.221, 15, 0, 24%	0.048, 212, 0, 73%	0.033, 14, 3%
t_avg_tri.mm.2	3.974, 231, 1.68e-10, 93%	0.166, 72, 7%		1.565, 15, 0.001, 15%	0.596, 216, 0, 83%	0.161, 14, 1%
SR_unitless	74.096, 230, 5.11e-51, 100%	0, 71, 0%		0.047, 15, 0, 42%	0.004, 215, 0, 58%	0, 14, 0%
LA_cm2	23.418, 244, 8.96e-38, 99%	0.055, 80, 1%		11.612, 15, 0, 54%	0.624, 229, 0, 45%	0.227, 14, 1%
LMA_g.m.2	7.935, 244, 8.54e-21, 96%	0.013, 80, 4%		0.595, 15, 0, 35%	0.07, 229, 0, 63%	0.033, 14, 2%
LTH_mm	9.832, 244, 5.43e-24, 97%	0.011, 80, 3%		0.694, 15, 0, 38%	0.072, 229, 0, 61%	0.027, 14, 1%
LD_g.cm.3	1.89, 244, 0.000553, 85%	0.06, 80, 15%		1.418, 15, 0, 66%	0.028, 229, 0.001, 20%	0.321, 14, 14%
LDMC_g.g.1	5.255, 244, 5.26e-15, 94%	0.003, 80, 6%		0.027, 15, 0.01, 12%	0.013, 229, 0, 86%	0.004, 14, 2%
SWC_g.g.1	6.544, 244, 5.07e-18, 95%	0.005, 80, 5%		0.074, 15, 0.002, 14%	0.03, 229, 0, 84%	0.01, 14, 2%
SWMA_g.m.2	7.285, 244, 1.49e-19, 96%	0.01, 80, 4%		0.562, 15, 0, 45%	0.044, 229, 0, 53%	0.032, 14, 2%
PLAdry_.	123.465, 239, 5.78e-62, 100%	0, 75, 0%		0.109, 15, 0, 20%	0.029, 224, 0, 80%	0.001, 13, 0%
PLTHdry_.	13.384, 215, 1.45e-21, 98%	0.004, 58, 2%		0.06, 13, 0.215, 8%	0.046, 202, 0, 92%	0.004, 11, 0%
PA_LA	7.797, 201, 8.36e-17, 96%	0.036, 64, 4%		0.932, 14, 0, 23%	0.231, 187, 0, 76%	0.065, 13, 1%
PA.Drymass_cm2.g.1	10.585, 201, 1.79e-20, 97%	0.033, 64, 3%		0.97, 14, 0, 19%	0.302, 187, 0, 80%	0.055, 13, 1%
PMA_g.cm.2	2.373, 183, 9.92e-05, 88%	0.046, 59, 12%		0.483, 14, 0, 31%	0.079, 169, 0.003, 61%	0.127, 13, 8%
WD_g.cm.3	3.659, 246, 1.89e-10, 92%	0.004, 80, 8%		0.045, 15, 0, 18%	0.013, 231, 0.001, 79%	0.01, 14, 4%
HuberValue_unitless	8.269, 101, 0.000253, 99%	0.025, 11, 1%		1.599, 5, 0, 39%	0.13, 96, 0.001, 60%	0.068, 3, 1%
BarkThicknessStemDiameterRatio	3.459, 221, 1.73e-07, 93%	0.012, 56, 7%		0.123, 13, 0, 16%	0.038, 208, 0.009, 80%	0.037, 10, 4%
Cmass_mg.g.1	2.829, 242, 2.17e-07, 90%	0, 77, 10%		0.006, 15, 0, 31%	0.001, 227, 0, 67%	0, 14, 2%
Narea_g.m.2	4.169, 241, 1.17e-11, 93%	0.013, 77, 7%		0.485, 15, 0, 52%	0.027, 226, 0, 44%	0.031, 14, 3%
Nmass_mg.g.1	6.972, 242, 2.54e-18, 96%	0.005, 77, 4%		0.096, 15, 0, 16%	0.032, 227, 0, 82%	0.011, 14, 2%
Parea_g.m.2	3.576, 235, 1.44e-09, 92%	0.034, 74, 8%		1.196, 15, 0, 60%	0.049, 220, 0, 36%	0.073, 14, 3%
Pmass_mg.g.1	3.332, 236, 8.06e-09, 91%	0.018, 74, 9%		0.349, 15, 0, 36%	0.04, 221, 0, 60%	0.042, 14, 4%
Kmass_mg.g.1	5.433, 236, 1.78e-14, 95%	0.016, 74, 5%		0.378, 15, 0, 27%	0.065, 221, 0, 70%	0.042, 14, 3%
Camass_mg.g.1	2.931, 236, 1.62e-07, 90%	0.032, 74, 10%		0.608, 15, 0, 39%	0.059, 221, 0, 55%	0.107, 14, 6%
Mgmass_mg.g.1	4.38, 236, 7.33e-12, 93%	0.043, 74, 7%		1.92, 15, 0, 61%	0.072, 221, 0, 34%	0.156, 14, 5%
Femass_mg.g.1	2.518, 236, 4.28e-06, 89%	0.036, 74, 11%		0.631, 15, 0, 42%	0.054, 221, 0, 53%	0.071, 14, 4%
Bmass_mg.g.1	2.385, 236, 1.28e-05, 88%	0.024, 74, 12%		0.32, 15, 0, 33%	0.04, 221, 0, 61%	0.058, 14, 6%
Mnmass_mg.g.1	3.95, 236, 1.13e-10, 93%	0.118, 74, 7%		3.426, 15, 0, 46%	0.266, 221, 0, 52%	0.188, 14, 2%
Namass_mg.g.1	4.223, 236, 1.94e-11, 93%	0.131, 74, 7%		6.114, 15, 0, 67%	0.175, 221, 0, 28%	0.491, 14, 5%
Znmass_mg.g.1	1.525, 236, 0.0171, 83%	0.055, 74, 17%		0.245, 15, 0, 18%	0.073, 221, 0.002, 78%	0.06, 14, 4%
Cumass_mg.g.1	3.354, 236, 6.86e-09, 91%	0.022, 74, 9%		0.292, 15, 0, 25%	0.058, 221, 0, 72%	0.037, 14, 3%
Momass_mg.g.1	3.685, 236, 6.72e-10, 92%	0.133, 74, 8%		3.234, 15, 0, 40%	0.303, 221, 0, 55%	0.42, 14, 5%
Comass_mg.g.1	3.916, 236, 1.42e-10, 93%	0.218, 74, 7%		8.847, 15, 0, 62%	0.312, 221, 0, 32%	0.826, 14, 5%
Almass_mg.g.1	4.251, 236, 1.63e-11, 93%	0.086, 74, 7%		0.732, 15, 0.009, 12%	0.341, 221, 0, 85%	0.139, 14, 2%
Asmass_mg.g.1	1.746, 236, 0.00279, 85%	0.088, 74, 15%		0.92, 15, 0, 34%	0.102, 221, 0.005, 56%	0.279, 14, 10%
Cdmass_mg.g.1	4.03, 236, 6.69e-11, 93%	0.21, 74, 7%		6.733, 15, 0, 48%	0.445, 221, 0, 47%	0.647, 14, 4%
Rbmass_mg.g.1	1.918, 236, 0.000653, 86%	0.135, 74, 14%		2.517, 15, 0, 55%	0.105, 221, 0.001, 34%	0.527, 14, 11%
Srmass_mg.g.1	3.098, 236, 4.53e-08, 91%	0.076, 74, 9%		1.845, 15, 0, 48%	0.125, 221, 0, 48%	0.171, 14, 4%
Semass_mg.g.1	2.007, 140, 0.0028, 85%	0.061, 50, 15%		0.462, 9, 0, 23%	0.098, 131, 0.023, 72%	0.133, 6, 4%
Nimass_mg.g.1	5.385, 140, 4.12e-10, 94%	0.035, 50, 6%		1.135, 9, 0, 38%	0.126, 131, 0, 61%	0.035, 6, 1%
Chlarea_SPAD	6.66, 229, 2.01e-17, 95%	0.002, 76, 5%		0.033, 15, 0.005, 14%	0.014, 214, 0, 85%	0.005, 14, 2%
N_P	2.449, 236, 7.53e-06, 89%	0.018, 74, 11%		0.323, 15, 0, 44%	0.026, 221, 0, 52%	0.038, 14, 5%
C_N	8.186, 241, 1.46e-20, 96%	0.005, 77, 4%		0.126, 15, 0, 19%	0.036, 226, 0, 80%	0.011, 14, 1%
SPAD_Narea	3.092, 228, 4.28e-08, 90%	0.079, 75, 10%		3.111, 15, 0, 79%	0.043, 213, 0, 16%	0.238, 14, 6%
D13C_permil	3.516, 242, 1.09e-09, 92%	0.001, 77, 8%		0.028, 15, 0, 50%	0.002, 227, 0, 44%	0.003, 14, 6%
TLP_.MPa	3.199, 244, 6.61e-09, 91%	0.003, 80, 9%		0.039, 15, 0, 25%	0.007, 229, 0.003, 69%	0.011, 14, 6%
K0.1_mmol.m.2.s.1.MPa.1	1.321, 26, 0.373, 83%	0.108, 7, 17%		0.401, 7, 0, 68%	0.047, 19, 0.041, 22%	0.107, 4, 10%
psi_K0.1_80_.Mpa	0.413, 26, 0.952, 61%	0.122, 7, 39%		0.043, 7, 0.597, 18%	0.053, 19, 0.874, 62%	0.081, 4, 20%
Jmax_area_umol.m.2.s.1	2.116, 31, 0.0939, 86%	0.006, 11, 14%		0.02, 5, 0.166, 22%	0.012, 26, 0.509, 66%	0.018, 3, 12%
Vcmax_area_umol.m.2.s.1	4.842, 36, 0.00277, 94%	0.01, 12, 6%		0.154, 8, 0, 70%	0.015, 28, 0.006, 24%	0.026, 4, 6%
gc_mod_mol.m.2.s.1	1.902, 235, 0.000749, 86%	0.021, 74, 14%		0.239, 15, 0, 34%	0.027, 220, 0.004, 57%	0.07, 14, 9%
gc_gmax	2.961, 218, 6.51e-07, 91%	0.035, 65, 9%		0.559, 15, 0, 35%	0.07, 203, 0, 59%	0.099, 14, 6%
gmax_Narea_mol.g.1.s.1	5.111, 224, 8.98e-13, 94%	0.02, 68, 6%		0.728, 15, 0, 47%	0.056, 209, 0, 51%	0.044, 14, 3%
HmaxTRY_m	1.32456834356156e+28, 211, 0, 100%	0, 79, 0%		3.32, 15, 0, 42%	0.35, 196, 0, 58%	0, 14, 0%
SeedMassTRY_mg	1.47762594773632e+29, 217, 0, 100%	0, 79, 0%		13.864, 15, 0, 37%	1.743, 202, 0, 63%	0, 14, 0%
Average variance	0.92	0.08		0.35	0.61	0.04

## Sheet: Table_S5
Table_S5	Principal Components Analysis (PCA) loadings of eight climate variables across eight principal components (PC1–PC8). Values indicate the contribution of each climate variable—mean annual variables—precipitation (MAP), temperature (MAT), aridity index (MAAI), potential evapotranspiration (PET)— and growing season variables—aridity index (GSAI), PET (GSPET), precipitation (GSP), and temperature (GS…
PCA loadings
	PC1	PC2	PC3	PC4	PC5	PC6	PC7	PC8
MAP	0.959416	0.0834494	0.100907	-0.0847384	-0.228353	-0.0512736	0.0166833	-0.0119197
MAT	-0.208375	-0.919395	0.262103	0.115331	-0.135271	0.104834	-0.00223052	0.000131244
MAAI	0.955185	0.254729	0.0036085	-0.00851497	-0.147939	0.00761961	-0.0207249	0.0166391
PET	-0.784644	-0.51225	0.238167	-0.21211	-0.0438612	-0.135044	-0.00536671	0.00554719
GSAI	0.726254	0.012367	0.662992	0.123611	0.123066	-0.0353387	-0.0339624	-0.00410657
GSPET	0.784679	-0.421988	-0.291651	-0.331151	0.0917572	0.0482644	-0.0268702	-0.00351873
GSP	0.91982	-0.294689	0.21145	-0.0457327	0.131927	-0.000504534	0.053303	0.00633725
GST	0.589768	-0.548831	-0.518696	0.269894	0.025544	-0.0914686	-0.00706251	-0.000276745
Importance of components:
	PC1	PC2	PC3	PC4	PC5	PC6	PC7	PC8
Standard Deviation	2.2053	1.3639	0.928	0.48031	0.35792	0.2249	0.07244	0.0228
Proportion of Variance (%)	60.79	23.25	10.76	2.884	1.601	0.632	0.066	0.006
Cumulative Proportion (%)	60.79	84.05	94.81	97.694	99.295	99.927	99.993	100

## Sheet: Table_S6
Table S6	Principal Component Analysis (PCA) scores for eight climate-related principal component axes (PC1–PC8) for 328 species-site combinations, including 246 unique woody species sampled from 16 ecosystems across the continental U.S.A and northern Mexico. Each species is represented by a unique code combination of the first two letters of genus and species, and axis scores indicate the relative loading…
Code	PC1	PC2	PC3	PC4	PC5	PC6	PC7	PC8
SGMD_ACSP	-0.430702	-0.637408	-0.196966	-0.315962	-0.0700996	0.00121347	0.0418158	0.00183757
SGMD_AMSA	-0.598019	-0.621757	-0.433959	0.571878	-0.271352	-0.106623	-0.0366758	-0.00528999
SGMD_ARDR	0.0961905	-0.450759	-1.70184	-0.719236	0.08644	0.0614622	-0.203361	-0.0230428
SGMD_ARLU	0.34201	-0.584158	-1.57214	-1.15053	0.55115	0.118097	-0.112955	0.0043599
SGMD_CHLI	-0.453353	-0.525331	-0.22013	0.383707	-1.05665	-0.0937908	0.00205593	0.0348374
SGMD_CLAR	-0.243645	-0.658478	-0.346199	0.725763	0.223957	-0.0639281	-0.0986778	0.0467707
SGMD_CORA	-0.38772	-0.487808	0.277086	-1.1244	0.0888357	0.51681	0.20813	0.00476185
SGMD_EPCA	-0.306763	-0.640991	-0.250926	0.419239	0.203506	-0.0186324	-0.0927624	0.0241611
SGMD_EPNE	-0.379637	-0.511234	0.215141	-0.937875	0.226156	0.450817	0.141327	0.0152171
SGMD_ERCO	-0.362687	-0.554731	0.109828	-0.891959	0.345089	0.32689	0.142054	0.00772477
SGMD_ERCU	-0.0109707	-0.515883	0.819641	-1.10612	0.27509	0.181877	0.0773607	0.021089
SGMD_ERLI	-0.0972938	-0.533059	0.912919	-0.389421	0.206014	0.0029793	0.109631	0.0240966
SGMD_ERFA	-0.0779573	-0.642283	0.140567	0.137155	0.220055	-0.0889711	0.0291519	0.0250104
SGMD_GUMI	-0.324891	-0.527026	-0.40595	-0.949964	-0.40956	0.403748	0.0918001	-0.00644466
SGMD_LATR	-0.833548	-0.387844	-0.34146	2.48805	-2.07805	-0.669843	-0.168355	0.0135636
SGMD_LYCO	-0.35796	-0.638381	-0.18413	-0.77517	0.272601	0.150198	0.0934126	-0.0046269
SGMD_MESP	-0.60367	-0.419863	0.0466426	-0.975976	0.0235488	0.68961	0.167468	-0.0181847
SGMD_OTRI	-0.296701	-0.635476	-0.238372	0.0248173	-0.267933	-0.0754101	0.0273097	-0.0122683
SGMD_PRFA	-0.260979	-0.548764	0.329341	-0.760128	0.139402	0.20162	0.118752	0.0471168
SGMD_RHCRIL	0.110052	-0.630353	0.268154	0.0311435	0.331788	-0.00285901	-0.0247159	-0.0321155
SGMD_RHTR	0.172097	-0.71114	-2.0147	-1.32794	0.44335	0.161423	-0.0451607	-0.0436445
SGMD_SADO	-0.417045	-0.307775	0.679329	-0.0624582	-0.34553	0.221238	0.040062	0.0246053
SGMD_SAMO	-0.48018	-0.667003	-0.525014	-0.575176	-0.13278	-0.00452357	0.0621918	-0.0173564
SGMD_SCME	-0.443461	-0.644312	-0.430278	-0.315207	-0.0939251	0.0323823	0.0193079	-0.0106442
SGMD_SEFL	-0.0719053	-0.659209	-0.827209	-0.701741	-0.0381205	0.0448845	-0.0433322	-0.0220265
SGMD_SEAR	-1	-0.415114	-0.0235275	2.06316	-1.36913	-0.613757	-0.0766969	-0.0191456
SGMD_THMO	-0.446423	-0.607727	-0.345184	-0.337595	-0.112474	0.129278	0.0715724	-0.00703018
SGMD_YUSC	-0.206832	-0.677442	-0.324486	-0.183858	0.205485	-0.00492687	0.0292853	0.0400044
SRSM_ADFA	0.191727	-0.598851	0.690576	0.190272	0.36437	-0.0723382	-0.0251254	-0.0196098
SRSM_ARPU	0.365076	-0.784787	-1.11203	-1.18544	0.306296	-0.0699744	0.00018071	-0.00129896
SRSM_ARCA	0.0876714	-0.606183	0.267281	0.875659	0.324116	-0.0755259	0.00278078	0.0153734
SRSM_BAPI	0.38486	-0.529465	1.31245	0.78185	0.232646	-0.153285	-0.131509	0.0532496
SRSM_BASA	-0.266448	-0.521833	-0.397882	-0.560677	-0.62924	0.413666	0.0701977	0.0252472
SRSM_CESP	0.145189	-0.651958	-0.0896688	0.389524	0.422524	0.0493205	0.0465734	-0.0144723
SRSM_CEBE	0.241914	-0.517614	1.38701	-0.0825227	0.283309	-0.0952823	-0.0110585	-0.00948809
SRSM_DIAU	0.354598	-0.533214	1.41536	0.573754	0.250901	-0.205217	-0.0698939	0.029995
SRSM_EPCA	0.208815	-0.471501	1.37544	-0.365045	0.235879	0.039319	0.0182594	0.0203085
SRSM_ERFA	-0.0779573	-0.642283	0.140567	0.137155	0.220055	-0.0889711	0.0291519	0.0250104
SRSM_ERCO	0.141392	-0.594317	0.483297	0.0101099	0.370421	0.00623808	0.0521697	-0.00267052
SRSM_FRDI	0.182276	-0.588746	0.847264	0.225625	0.389899	-0.0729301	-0.0402145	-0.054516
SRSM_HASQ	0.147516	-0.62479	0.11462	0.254578	0.374356	0.0471628	0.0406345	0.00473709
SRSM_HEAR	0.251792	-0.594578	0.795976	0.476801	0.335169	-0.10675	-0.0788033	-0.0323962
SRSM_MAFA	0.0349308	-0.62979	0.0420471	0.734074	0.339022	-0.0428355	0.0505922	-0.00416344
SRSM_MALA	-0.000362338	-0.669022	-0.36863	0.803504	0.29916	0.0121986	0.0239708	-0.016692
SRSM_PRIL	0.094246	-0.644293	0.0212937	0.127133	0.373316	0.0519457	0.0120073	-0.0156185
SRSM_QUAG	0.214335	-0.596423	0.678237	0.344409	0.355623	-0.0828128	-0.0258025	-0.00715696
SRSM_QUBE	0.208176	-0.589544	0.896404	0.110668	0.34227	-0.13015	-0.00522715	-0.0153624
SRSM_RHOV	-0.00468997	-0.61701	0.303269	0.184645	0.124122	-0.109909	0.10129	0.00579586
SRSM_RHTR	0.172097	-0.71114	-2.0147	-1.32794	0.44335	0.161423	-0.0451607	-0.0436445
SRSM_SAEX	0.146973	-0.435745	-0.773394	-0.45675	-0.0166426	0.193195	-0.246527	0.0301316
SRSM_SALE	0.148105	-0.650508	0.0515252	0.314625	0.354297	-0.0188161	0.0194181	-0.00944567
SRSM_SAME	0.128078	-0.662796	0.00471708	0.327057	0.411004	-0.00741557	-0.00522545	-0.00154869
SRSM_SANI	0.530274	-0.784508	-0.668142	-1.32244	0.451367	-0.0514919	-0.323692	0.0246454
SRSM_TRLA	0.157722	-0.614732	0.416428	0.122962	0.36902	-0.040459	0.0562278	-0.00663382
ENSE_ADFA	0.191727	-0.598851	0.690576	0.190272	0.36437	-0.0723382	-0.0251254	-0.0196098
ENSE_AEPA	-0.188134	-0.567679	-0.955578	1.52596	0.446145	0.518897	-0.0503557	-0.0300756
ENSE_ARCA	0.0876714	-0.606183	0.267281	0.875659	0.324116	-0.0755259	0.00278078	0.0153734
ENSE_BASA	-0.222149	-0.673494	-0.563735	0.45699	-0.411134	-0.141116	-0.0410691	-5.73678e-05
ENSE_BALA	-0.14501	-0.62408	-0.556513	1.27629	0.26175	0.138805	-0.0190685	-0.0285174
ENSE_CLAR	-0.243645	-0.658478	-0.346199	0.725763	0.223957	-0.0639281	-0.0986778	0.0467707
ENSE_CNDU	-0.0532104	-0.641869	-0.614899	0.901376	0.399141	0.228921	0.0253452	-0.0207688
ENSE_ENCA	-0.00201518	-0.645317	-0.509892	1.02759	0.433396	0.169342	0.00539554	-0.013095
ENSE_ERCA	0.52137	-0.447793	2.40211	0.157041	0.152365	-0.300698	0.04461	0.020322
ENSE_ERFA	-0.0779573	-0.642283	0.140567	0.137155	0.220055	-0.0889711	0.0291519	0.0250104
ENSE_FRDI	0.182276	-0.588746	0.847264	0.225625	0.389899	-0.0729301	-0.0402145	-0.054516
ENSE_HABE	-0.118257	-0.530306	-0.637507	1.65765	0.421393	0.496643	-0.0104009	-0.016865
ENSE_MAFA	0.0349308	-0.62979	0.0420471	0.734074	0.339022	-0.0428355	0.0505922	-0.00416344
ENSE_MALA	-0.000362338	-0.669022	-0.36863	0.803504	0.29916	0.0121986	0.0239708	-0.016692
ENSE_MILA	-0.201368	-0.696002	-0.459151	0.0594103	0.22131	-0.00912987	-0.0260659	0.0234785
ENSE_QUAG	0.214335	-0.596423	0.678237	0.344409	0.355623	-0.0828128	-0.0258025	-0.00715696
ENSE_RHIN	0.0359792	-0.635121	-0.343215	1.02556	0.386015	0.108779	0.0111447	-0.0127038
ENSE_ROTR	0.0391897	-0.584354	0.221439	0.655703	0.326331	0.0275434	0.0685296	-0.00378864
ENSE_SANI	0.530274	-0.784508	-0.668142	-1.32244	0.451367	-0.0514919	-0.323692	0.0246454
ENSE_SICH	-0.297781	-0.724834	-0.89876	0.560594	-0.19385	-0.0955203	-0.0868068	-0.0283192
ENSE_VEDI	-0.0248358	-0.607033	-0.651948	1.12839	0.492624	0.357511	0.0157318	-0.0157967
YFDP_ABCO	0.408603	-0.363735	-0.797414	-1.12833	-0.0904573	-0.172758	-0.177418	-0.0462825
YFDP_ARPA	0.33964	-0.209752	0.499398	-0.542887	-0.493952	-0.15557	-0.103537	-0.0393074
YFDP_CADE	0.499901	-0.249234	2.02386	-0.445541	-0.231791	-0.00686395	0.0502244	0.022625
YFDP_CECO	0.271801	-0.116224	1.22265	-0.461449	-0.764133	-0.134524	0.0202907	-0.0178103
YFDP_CEIN	0.546085	-0.426027	2.20134	-0.646263	0.28162	-0.0784882	-0.0437637	-0.0297579
YFDP_CEPA	0.437397	-0.302922	1.88984	-0.820347	-0.191899	-0.128914	0.150512	-0.024258
YFDP_CHFO	0.535249	-0.405679	2.38524	-1.02543	0.251643	-0.116735	0.130429	-0.0350581
YFDP_CHSE	0.0946223	-0.0973612	-1.23734	-0.181667	-1.66189	-0.435567	0.0533559	-0.00306745
YFDP_COCO	0.659092	-0.228123	-0.972445	0.181603	-0.0813733	0.116343	-0.0310164	-0.00126484
YFDP_LEDA	0.576259	-0.176472	0.878541	-0.707387	-0.56116	-0.160079	-0.0270136	-0.0779006
YFDP_PILA	0.432845	-0.221618	1.66504	-0.359465	-0.514428	-0.115301	0.0384883	0.0177924
YFDP_PIPO	0.280093	-0.430899	-2.3077	-1.02265	-0.0369267	0.0621322	-0.033582	-0.0113007
YFDP_PREM	0.354192	-0.175977	-0.70171	-0.383289	-0.889054	0.0433956	-0.0251404	0.0140745
YFDP_RINE	0.251218	-0.213445	0.885198	-0.390235	-0.798536	-0.283079	-0.0307877	-0.0158991
YFDP_RIRO	0.340155	-0.294541	1.20079	-0.502448	-0.437443	-0.164406	0.0108494	0.00631359
YFDP_ROBR	0.51043	-0.30525	2.11242	-0.67461	-0.300038	-0.240261	0.147744	-0.0206695
YFDP_RUPA	0.711041	-0.0915733	-0.427573	0.102983	0.0378533	0.219313	-0.0790465	0.0920706
YFDP_SASC	0.455233	-0.0868168	-1.46377	-0.327867	0.148639	-0.0461418	-0.180722	0.00467738
YFDP_SYMO	0.538249	-0.384909	1.92586	-0.428756	0.344397	0.117813	-0.0890595	0.0330492
YFDP_VAUL	0.641736	1	-2.17613	0.203498	1.97232	-1.96109	0.135317	-0.0775764
OC_ABMA	0.320161	-0.0593004	-0.893045	-0.493495	-1.47748	-0.224982	0.0861032	0.00565011
OC_ALIN	0.558137	-0.131773	-1.31755	0.220504	0.354202	-0.116923	-0.0829	0.0202689
OC_ARNE	0.489918	-0.0921749	-0.00666549	-0.452686	-1.19814	-0.00593782	0.113458	0.00642583
OC_ARPA	0.33964	-0.209752	0.499398	-0.542887	-0.493952	-0.15557	-0.103537	-0.0393074
OC_CADE	0.499901	-0.249234	2.02386	-0.445541	-0.231791	-0.00686395	0.0502244	0.022625
OC_CECO	0.271801	-0.116224	1.22265	-0.461449	-0.764133	-0.134524	0.0202907	-0.0178103
OC_CEIN	0.546085	-0.426027	2.20134	-0.646263	0.28162	-0.0784882	-0.0437637	-0.0297579
OC_CEVE	0.402421	-0.120962	-0.613113	0.0240296	-0.839463	0.214781	0.0617069	-0.0102923
OC_JUOC	-0.111004	-0.0527099	-0.697922	-0.268989	-1.00785	0.204515	0.137523	-0.000104511
OC_PIAL	0.392878	0.160953	-1.57054	-0.831094	-0.0499592	-0.248204	0.0101715	-0.00936806
OC_PICO	0.437261	-0.0997121	-1.54369	-0.535797	-0.236777	0.0688771	-0.115438	0.00209745
OC_PIJE	0.416448	-0.158026	1.82716	-0.493377	-0.443843	0.000598425	0.0563527	0.0241645
OC_POFR	-0.0880735	-0.54751	0.569227	-0.0588999	0.021492	0.0371442	-0.0285605	-0.00768545
OC_POTR	0.501963	-0.184346	-1.25206	-0.388337	0.543896	0.0568383	-0.0279673	0.0641796
OC_PREM	0.354192	-0.175977	-0.70171	-0.383289	-0.889054	0.0433956	-0.0251404	0.0140745
OC_QUVA	0.500566	-0.168641	1.12843	-0.148456	-0.660424	-0.215199	-0.076597	-0.0402982
OC_RIRO	0.340155	-0.294541	1.20079	-0.502448	-0.437443	-0.164406	0.0108494	0.00631359
OC_RUPA	0.711041	-0.0915733	-0.427573	0.102983	0.0378533	0.219313	-0.0790465	0.0920706
OC_SARAMI	0.617681	-0.1028	-0.945713	0.19881	0.0506226	-0.0661611	-0.0559666	0.0416379
ACRR_ACMA	0.63256	-0.375707	2.30331	-0.00894811	0.227302	0.0369676	-0.111605	0.0424929
ACRR_AECA	0.391822	-0.55908	1.55576	0.188396	0.291635	-0.274297	-0.0605734	-0.0140136
ACRR_ALRH	0.434375	-0.453612	1.9389	0.0046941	0.278432	-0.0954404	-0.105273	0.0379554
ACRR_ARME	0.680084	-0.359535	2.34459	0.251062	0.18987	0.0507776	-0.0391	0.0171144
ACRR_ARMA	0.581484	-0.394832	2.77046	0.234347	0.0934298	-0.293786	0.0995054	0.0243221
ACRR_CECU	0.427765	-0.493454	1.71366	0.0727967	0.304286	-0.169393	-0.0468341	-0.000911151
ACRR_CEIN	0.781485	-0.370216	2.58246	0.285003	0.0895345	-0.142324	0.0706672	-0.0031158
ACRR_CONU	0.641648	-0.315961	1.66717	-0.123968	-0.19344	-0.0788939	-0.0798272	-0.0104875
ACRR_COCO	0.659092	-0.228123	-0.972445	0.181603	-0.0813733	0.116343	-0.0310164	-0.00126484
ACRR_FRCA	0.427476	-0.478721	1.78966	-0.328152	0.220147	-0.158269	-0.0590012	0.0433917
ACRR_FRLA	0.597026	-0.434001	2.18753	0.108922	0.266286	-0.0651607	-0.172742	0.0169295
ACRR_HODI	0.447677	-0.263553	0.196713	-0.476627	-0.356371	-0.0457044	-0.232578	-0.0385881
ACRR_NODE	0.758118	-0.33209	2.73851	0.041675	0.0854036	-0.0807278	0.10254	0.00750046
ACRR_PSME	0.52261	-0.383978	-0.709962	-0.805219	0.0699209	0.0355882	-0.189082	-0.044935
ACRR_QUCH	0.434881	-0.406972	2.18553	-0.592266	0.239838	-0.088089	-0.00171466	0.0451498
ACRR_QUGA	0.64833	-0.236061	2.90728	-0.160159	0.246591	0.24047	0.0554718	0.0013194
ACRR_QUWIFR	0.27119	-0.478424	1.64017	-0.288762	0.24226	-0.0859366	0.110759	0.0181476
ACRR_RULE	0.584179	-0.301045	0.747965	-0.432165	-0.237116	0.0231652	-0.191718	-0.00504589
ACRR_SESE	0.650788	-0.484549	1.62466	0.400007	0.167874	-0.0526565	-0.0898297	0.0149788
ACRR_UMCA	0.55082	-0.484386	2.08854	0.226061	0.153337	-0.310935	-0.0596319	0.0476047
ACRR_VAOV	0.819416	-0.376745	2.00028	0.355198	0.141919	0.120381	-0.0580212	0.0306807
SCBI_CAAL	0.802233	-0.674362	-0.0988864	-0.122087	-0.0597006	0.0412911	0.0261635	-0.0147393
SCBI_CACO	0.733451	-0.503062	-0.516331	0.152779	0.114831	0.0964514	0.0344815	-0.00996685
SCBI_CAGL	0.811669	-0.68362	-0.0819766	-0.0638745	-0.0855609	0.0332206	0.0169463	-0.00866093
SCBI_CAGLOD	0.782276	-0.577938	-0.429789	0.279377	-0.172394	-0.0135647	0.0413143	-0.00609709
SCBI_FAGR	0.795889	-0.488077	-0.207408	0.299731	-0.0403095	0.0891525	0.0140851	0.000163794
SCBI_FRAM	0.761421	-0.487716	-0.358354	0.208179	0.0447334	0.100675	0.00509536	0.002329
SCBI_JUNI	0.682674	-0.596441	-0.76275	-0.0100094	0.0737421	-0.0148044	-0.0201182	0.00765974
SCBI_LITU	0.788112	-0.62879	-0.22278	0.0876516	-0.0927156	0.0219058	0.0101577	-0.0147963
SCBI_QUAL	0.761558	-0.537071	-0.452289	0.240014	-0.0340387	0.0494392	0.0285972	-0.0106808
SCBI_QUMI	0.844301	-0.752301	0.0516172	-0.189674	-0.0987732	-0.0174022	0.0166032	-0.0133546
SCBI_QURU	0.736255	-0.382712	-0.501073	0.444182	0.149841	0.0754171	-0.0232076	-0.0158032
SCBI_QUVE	0.749244	-0.563107	-0.530073	0.192562	-0.0315122	0.015211	0.035496	-0.00601329
WFDP_ABAM	0.831491	-0.00820469	0.158514	-0.0608773	-0.650061	0.309208	0.0028456	-0.0110593
WFDP_ABGR	0.407109	-0.0456147	-0.428864	0.225505	-0.674279	0.432149	0.0865653	0.00315851
WFDP_ACCI	0.840821	-0.206481	1.88127	0.238383	-0.216037	0.253628	-0.0413669	-0.0123786
WFDP_ALRU	0.873983	-0.238801	1.31752	0.31023	-0.113637	0.447263	-0.125234	-0.00691964
WFDP_AMAL	0.528783	-0.16925	-1.34508	-0.246973	0.114446	0.247772	-0.0835926	0.00285813
WFDP_CONU	0.641648	-0.315961	1.66717	-0.123968	-0.19344	-0.0788939	-0.0798272	-0.0104875
WFDP_COCOCA	0.68388	-0.267968	2.80587	-0.161215	0.192695	0.126704	0.0969428	0.00339783
WFDP_GASH	1	-0.264364	2.07873	0.186994	0.129515	0.489594	-0.00663822	0.0294988
WFDP_HODI	0.447677	-0.263553	0.196713	-0.476627	-0.356371	-0.0457044	-0.232578	-0.0385881
WFDP_PSME	0.52261	-0.383978	-0.709962	-0.805219	0.0699209	0.0355882	-0.189082	-0.044935
WFDP_RHMA	0.873296	-0.184286	1.48717	0.122246	-0.0877858	0.475585	-0.0337181	-0.0637145
WFDP_RHME	0.748589	0.0806998	-0.192163	0.288337	-0.291507	0.209133	-0.0634577	0.00266227
WFDP_RUSP	0.94953	-0.150093	1.08714	0.360929	-0.243088	0.580791	-0.0725737	-0.00886797
WFDP_TABR	0.598546	-0.18163	-0.53049	0.0761724	-0.788707	0.169296	-0.0714796	-0.00303997
WFDP_THPL	0.745883	-0.21071	-0.216525	0.0805449	-0.345565	0.505411	-0.106066	0.000120174
WFDP_TSHE	0.815957	-0.120035	-0.0672926	0.436416	-0.703297	0.421162	-0.0799587	0.00288699
WFDP_VAOV	0.895806	0.206126	0.388763	0.810195	-0.21322	0.250355	0.0228431	-0.026974
WFDP_VAPA	0.93323	-0.228023	1.65135	0.0582692	-0.219227	0.278143	-0.062195	0.00102471
SERC_ACRU	0.782517	-0.532754	-0.328078	0.29742	-0.0667086	0.0401143	-0.00245394	0.00142096
SERC_ASTR	0.75012	-0.649571	-0.639647	0.196662	-0.155036	-0.106253	0.0254542	-0.0056053
SERC_CACA	0.813846	-0.633055	0.212183	-0.297128	0.0611178	0.205045	0.0258086	-0.0188979
SERC_CAAL	0.802233	-0.674362	-0.0988864	-0.122087	-0.0597006	0.0412911	0.0261635	-0.0147393
SERC_CACO	0.733451	-0.503062	-0.516331	0.152779	0.114831	0.0964514	0.0344815	-0.00996685
SERC_CAGL	0.811669	-0.68362	-0.0819766	-0.0638745	-0.0855609	0.0332206	0.0169463	-0.00866093
SERC_COFL	0.782689	-0.66219	-0.13028	-0.153336	-0.0161564	0.0812489	0.0103542	-0.00913019
SERC_FAGR	0.795889	-0.488077	-0.207408	0.299731	-0.0403095	0.0891525	0.0140851	0.000163794
SERC_FRAM	0.761421	-0.487716	-0.358354	0.208179	0.0447334	0.100675	0.00509536	0.002329
SERC_FRPE	0.661718	-0.521169	-0.745945	-0.0842719	0.211575	0.0837696	-0.0150944	0.00564514
SERC_LIBE	0.765121	-0.568826	-0.462457	0.228567	-0.100296	0.00177608	0.0294128	0.000322355
SERC_LIST	0.857424	-0.810309	-0.0632089	-0.18778	-0.212261	-0.125617	0.0516769	0.0115014
SERC_LITU	0.788112	-0.62879	-0.22278	0.0876516	-0.0927156	0.0219058	0.0101577	-0.0147963
SERC_NYSY	0.815725	-0.631626	0.0370414	-0.086323	-0.0387778	0.107193	0.029911	-0.0112081
SERC_PLOC	0.719514	-0.68137	-0.746149	0.111767	-0.116411	-0.145805	-0.0141755	0.0119046
SERC_QUAL	0.761558	-0.537071	-0.452289	0.240014	-0.0340387	0.0494392	0.0285972	-0.0106808
SERC_QUFA	0.834305	-0.763685	-0.00522118	-0.20002	-0.0951048	-0.0248631	0.0146645	-0.0174884
SERC_QUMI	0.844301	-0.752301	0.0516172	-0.189674	-0.0987732	-0.0174022	0.0166032	-0.0133546
SERC_QUPA	0.729348	-0.555075	-0.571771	0.115413	0.0499615	0.0246825	0.0137919	-0.00598213
SERC_QURU	0.736255	-0.382712	-0.501073	0.444182	0.149841	0.0754171	-0.0232076	-0.0158032
SERC_QUVE	0.749244	-0.563107	-0.530073	0.192562	-0.0315122	0.015211	0.035496	-0.00601329
SERC_ULRU	0.731721	-0.545715	-0.566848	0.144685	0.0427128	0.0377632	0.0195895	-0.00622643
HARV_ACPE	0.779051	-0.241297	-0.528919	0.720278	-0.0237921	0.0692928	0.0959649	0.0216366
HARV_ACRU	0.782517	-0.532754	-0.328078	0.29742	-0.0667086	0.0401143	-0.00245394	0.00142096
HARV_ACSA	0.744599	-0.378769	-0.47033	0.468277	0.158146	0.0696277	-0.0308609	-0.0116472
HARV_AMLA	0.749862	-0.212758	-0.698916	0.709565	0.138879	0.140768	0.0886274	0.0103478
HARV_BEAL	0.764853	-0.185503	-0.619547	0.689604	0.164079	0.119527	0.0933457	0.0144343
HARV_BELE	0.780846	-0.403348	-0.337856	0.503735	-0.0676125	0.0362312	0.060068	-0.00746377
HARV_BEPA	0.679807	-0.0102219	-0.993541	0.832473	0.527579	0.000833084	-0.0153985	0.00566235
HARV_CADE	0.795535	-0.446725	-0.153755	0.205525	-0.0384678	0.132869	0.0737487	0.00323125
HARV_FAGR	0.795889	-0.488077	-0.207408	0.299731	-0.0403095	0.0891525	0.0140851	0.000163794
HARV_FASY	0.614605	-0.535888	-0.795691	-0.112609	0.103156	0.179977	-0.183626	0.00833259
HARV_FRAM	0.761421	-0.487716	-0.358354	0.208179	0.0447334	0.100675	0.00509536	0.002329
HARV_HAVI	0.788104	-0.51838	-0.29856	0.296664	-0.0845125	0.0693437	0.0409863	-0.00139205
HARV_ILMU	0.776366	-0.0129726	-0.710744	1.07825	0.333642	-0.0394495	0.0529753	-0.00191426
HARV_ILVE	0.767364	-0.338342	-0.364043	0.540093	0.13237	0.120415	-0.00166028	-0.0209052
HARV_KALA	0.809788	-0.520389	-0.211446	0.259657	-0.163978	0.0220362	0.0754252	0.00714095
HARV_LYLI	0.814004	-0.605281	-0.0777214	0.130306	-0.104404	0.0315479	0.0154171	0.00251888
HARV_NYSY	0.815725	-0.631626	0.0370414	-0.086323	-0.0387778	0.107193	0.029911	-0.0112081
HARV_OSVI	0.757581	-0.584348	-0.0890797	-0.0581035	0.0945739	0.0656922	-0.00077724	-0.00999424
HARV_PIAB	0.702767	-0.400942	-0.616248	0.393829	0.154771	0.112742	-0.0637356	-0.0148393
HARV_PIRE	0.715121	-0.133714	-0.879552	0.642683	0.434033	0.184694	0.0894024	0.00668659
HARV_PIST	0.777133	-0.38307	-0.180982	0.545346	0.128542	0.0511321	0.0244529	-0.0036148
HARV_PRSE	0.694203	-0.634138	-0.205563	-0.546618	0.175641	0.108236	-0.0615081	0.0236172
HARV_QURU	0.736255	-0.382712	-0.501073	0.444182	0.149841	0.0754171	-0.0232076	-0.0158032
HARV_RHPR	0.777375	-0.399769	-0.337031	0.497503	-0.0242778	0.0396004	0.0338274	-0.00296043
HARV_TSCA	0.779536	-0.305847	-0.257093	0.517614	0.135832	0.142794	0.0179172	-0.01826
HARV_VACO	0.838378	-0.625115	0.14524	-0.0309278	-0.0505682	0.0921192	-0.00515163	-0.00688728
OSBS_ASIN	0.815016	-0.952357	-0.581739	-0.100054	-0.333989	-0.249968	0.0595371	0.0223881
OSBS_CAGL	0.811669	-0.68362	-0.0819766	-0.0638745	-0.0855609	0.0332206	0.0169463	-0.00866093
OSBS_CEER	0.829238	-0.98981	-0.573228	-0.134266	-0.377747	-0.358204	0.041626	0.0255481
OSBS_DIVI	0.79358	-0.755589	-0.110743	-0.339887	-0.0380615	0.0061994	0.00848967	-0.007484
OSBS_GEOB	0.844954	-0.976128	-0.48145	-0.114735	-0.377359	-0.356993	0.0366076	0.0242475
OSBS_ILCA	0.827057	-0.989422	-0.572479	-0.159749	-0.373756	-0.364514	0.0387483	0.028586
OSBS_ILGL	0.843905	-0.865159	-0.236097	-0.11259	-0.240702	-0.17252	0.0183448	0.0129864
OSBS_LYLU	0.847972	-0.921795	-0.353845	-0.107574	-0.317959	-0.269175	0.035748	0.0167646
OSBS_PEPA	0.843484	-0.911004	-0.345263	-0.110451	-0.298187	-0.245354	0.0315449	0.015515
OSBS_PICL	0.822823	-1	-0.622648	-0.142126	-0.384803	-0.365739	0.0465334	0.0265225
OSBS_PIPA	0.843433	-0.867001	-0.234212	-0.133614	-0.240414	-0.183412	0.0272536	0.00501441
OSBS_PITA	0.832578	-0.796357	-0.0980245	-0.163424	-0.132969	-0.0621286	0.01293	-0.0111661
OSBS_PRUM	0.819956	-0.824476	-0.210904	-0.177187	-0.153163	-0.0916166	0.0160797	-0.00642999
OSBS_QUGE	0.834302	-0.976521	-0.527025	-0.13328	-0.370307	-0.344005	0.0444915	0.0247352
OSBS_QUHE	0.859772	-0.869569	-0.173013	-0.122225	-0.259469	-0.213521	0.0270225	0.00283996
OSBS_QULA	0.849336	-0.900553	-0.287587	-0.123135	-0.28705	-0.245827	0.0286482	0.010246
OSBS_QUMA	0.814931	-0.889345	-0.365429	-0.180262	-0.216524	-0.195206	0.00797732	0.00207248
OSBS_QUNI	0.833757	-0.830227	-0.152815	-0.174712	-0.164246	-0.129703	0.00262451	-0.00869103
OSBS_QUVI	0.777931	-0.939343	-0.579076	-0.288558	-0.220912	-0.26088	-0.0162646	0.020209
OSBS_SERE	0.829536	-0.990223	-0.570573	-0.124174	-0.374367	-0.357137	0.0359895	0.0236656
OSBS_VAAR	0.836404	-0.83642	-0.163763	-0.179839	-0.182056	-0.143775	0.0119344	-0.00421602
OSBS_VAMY	0.821994	-0.986085	-0.601082	-0.13164	-0.369025	-0.336273	0.0472437	0.0246644
OSBS_VAST	0.82838	-0.68817	0.117174	-0.229147	-0.0263605	0.113348	0.0320689	-0.00833854
OSBS_VIRO	0.829098	-0.867746	-0.275146	-0.160113	-0.215456	-0.173351	0.0164225	0.00199845
SJER_AECA	0.391822	-0.55908	1.55576	0.188396	0.291635	-0.274297	-0.0605734	-0.0140136
SJER_ARVIMA	0.584202	-0.471385	2.23326	-0.380977	0.220013	-0.234503	-0.0277979	-0.0260999
SJER_CECU	0.427765	-0.493454	1.71366	0.0727967	0.304286	-0.169393	-0.0468341	-0.000911151
SJER_CELE	0.132199	-0.549828	0.808393	-0.390179	0.30597	0.0318388	0.147437	0.00149207
SJER_DAWR	-0.0863922	-0.62396	0.019983	0.0703963	-0.145883	-0.0518945	-0.0421298	0.0201954
SJER_FRCA	0.427476	-0.478721	1.78966	-0.328152	0.220147	-0.158269	-0.0590012	0.0433917
SJER_LUAL	0.426478	-0.489726	1.57235	0.197283	0.323897	-0.115038	-0.0213101	-0.0122877
SJER_PISA	0.375925	-0.529833	1.79113	-0.00449098	0.297039	-0.259514	-0.0274761	-0.0321902
SJER_QUDO	0.270599	-0.506705	1.70203	0.35035	0.277091	-0.187499	0.00917034	-0.0197179
SJER_QUWI	0.341574	-0.553682	1.35384	-0.276795	0.326898	-0.192608	-0.0199375	-0.00452555
SJER_RHCRIL	0.110052	-0.630353	0.268154	0.0311435	0.331788	-0.00285901	-0.0247159	-0.0321155
SJER_SALA	0.0828355	-0.582011	0.597227	-0.151872	0.330095	0.0333723	-0.0309026	-0.0285966
SJER_SACE	0.256957	-0.410444	1.31908	-0.516641	0.362307	0.275686	-0.101529	0.00675363
SJER_SEFL	-0.0719053	-0.659209	-0.827209	-0.701741	-0.0381205	0.0448845	-0.0433322	-0.0220265
MOFL_ACSA	0.744599	-0.378769	-0.47033	0.468277	0.158146	0.0696277	-0.0308609	-0.0116472
MOFL_CACO	0.733451	-0.503062	-0.516331	0.152779	0.114831	0.0964514	0.0344815	-0.00996685
MOFL_CAOV	0.728882	-0.560115	-0.537181	0.157511	0.0286091	0.0333971	0.0110273	0.00963094
MOFL_CEOC	0.655274	-0.561811	-0.817664	-0.148304	0.202574	0.00879994	-0.00022248	0.0140092
MOFL_COFL	0.782689	-0.66219	-0.13028	-0.153336	-0.0161564	0.0812489	0.0103542	-0.00913019
MOFL_FRAM	0.761421	-0.487716	-0.358354	0.208179	0.0447334	0.100675	0.00509536	0.002329
MOFL_FRPE	0.661718	-0.521169	-0.745945	-0.0842719	0.211575	0.0837696	-0.0150944	0.00564514
MOFL_FRQU	0.734066	-0.583526	-0.61864	0.167234	-0.00593	-0.000373667	0.0221898	-0.0138535
MOFL_JUNI	0.682674	-0.596441	-0.76275	-0.0100094	0.0737421	-0.0148044	-0.0201182	0.00765974
MOFL_JUVI	0.717871	-0.667332	-0.729424	0.084841	-0.092032	-0.138427	-0.00545562	0.0079106
MOFL_OSVI	0.757581	-0.584348	-0.0890797	-0.0581035	0.0945739	0.0656922	-0.00077724	-0.00999424
MOFL_PRSE	0.694203	-0.634138	-0.205563	-0.546618	0.175641	0.108236	-0.0615081	0.0236172
MOFL_QUAL	0.761558	-0.537071	-0.452289	0.240014	-0.0340387	0.0494392	0.0285972	-0.0106808
MOFL_QUIM	0.726162	-0.544845	-0.615948	0.135364	0.08279	0.0547586	0.042717	-0.00706231
MOFL_QUMU	0.702024	-0.678606	-0.785789	0.00882935	-0.0625369	-0.164078	-0.017977	0.0159894
MOFL_QURU	0.736255	-0.382712	-0.501073	0.444182	0.149841	0.0754171	-0.0232076	-0.0158032
MOFL_QUSH	0.762035	-0.749724	-0.349509	-0.238579	-0.0629195	-0.068342	-0.00222552	-0.0121749
MOFL_QUST	0.7586	-0.75104	-0.364662	-0.253155	-0.0666025	-0.0697331	-0.00442325	-0.00359007
MOFL_QUVE	0.749244	-0.563107	-0.530073	0.192562	-0.0315122	0.015211	0.035496	-0.00601329
MOFL_ULRU	0.731721	-0.545715	-0.566848	0.144685	0.0427128	0.0377632	0.0195895	-0.00622643
RPFS_CLAL	0.823745	-0.628977	0.0473553	-0.0506534	-0.0652306	0.114255	0.0359062	-0.0057286
RPFS_COPE	0.741114	-0.230092	-0.740437	0.682744	0.137052	0.0963946	0.0926507	0.00337974
RPFS_GABA	0.785785	-0.293077	-0.229433	0.563986	0.130499	0.170196	0.00646125	-0.0126658
RPFS_ILGL	0.843905	-0.865159	-0.236097	-0.11259	-0.240702	-0.17252	0.0183448	0.0129864
RPFS_KALA	0.809788	-0.520389	-0.211446	0.259657	-0.163978	0.0220362	0.0754252	0.00714095
RPFS_PIEC	0.830756	-0.74231	0.0368481	-0.24418	-0.0697218	0.00187575	0.0189645	-0.0165706
RPFS_PIRI	0.773911	-0.425599	-0.375836	0.49805	-0.100846	0.0085568	0.0332442	-0.00575385
RPFS_PIVI	0.797048	-0.60297	-0.162427	0.0823505	-0.0951329	0.0509676	0.0432921	-0.0123356
RPFS_QUAL	0.761558	-0.537071	-0.452289	0.240014	-0.0340387	0.0494392	0.0285972	-0.0106808
RPFS_QUCO	0.776089	-0.5458	-0.389427	0.221291	-0.104469	0.0166946	0.0345287	0.00203499
RPFS_QUIL	0.768575	-0.383909	-0.381128	0.515266	-0.0114115	0.0780517	0.0478427	-0.00861696
RPFS_QUMA	0.763326	-0.749638	-0.343921	-0.258122	-0.0762348	-0.0769722	-0.0045395	-0.000551909
RPFS_QUMI	0.844301	-0.752301	0.0516172	-0.189674	-0.0987732	-0.0174022	0.0166032	-0.0133546
RPFS_QUST	0.7586	-0.75104	-0.364662	-0.253155	-0.0666025	-0.0697331	-0.00442325	-0.00359007
RPFS_QUVE	0.749244	-0.563107	-0.530073	0.192562	-0.0315122	0.015211	0.035496	-0.00601329
RPFS_SMRO	0.819052	-0.638229	0.0343576	-0.0765569	-0.0434261	0.0891061	0.0114982	-0.0134769
RPFS_VACO	0.838378	-0.625115	0.14524	-0.0309278	-0.0505682	0.0921192	-0.00515163	-0.00688728
RPFS_VAPA	0.785152	-0.486955	-0.267686	0.21733	-0.0467213	0.0881427	0.0702856	0.00159091
GRSM_ACPE	0.779051	-0.241297	-0.528919	0.720278	-0.0237921	0.0692928	0.0959649	0.0216366
GRSM_ACRU	0.782517	-0.532754	-0.328078	0.29742	-0.0667086	0.0401143	-0.00245394	0.00142096
GRSM_ACSA	0.744599	-0.378769	-0.47033	0.468277	0.158146	0.0696277	-0.0308609	-0.0116472
GRSM_BELE	0.780846	-0.403348	-0.337856	0.503735	-0.0676125	0.0362312	0.060068	-0.00746377
GRSM_CAFL	0.85568	-0.686287	0.233149	-0.226354	-0.0547989	0.0686451	0.0376281	-0.0113727
GRSM_CACA	0.813846	-0.633055	0.212183	-0.297128	0.0611178	0.205045	0.0258086	-0.0188979
GRSM_CADE	0.795535	-0.446725	-0.153755	0.205525	-0.0384678	0.132869	0.0737487	0.00323125
GRSM_COFL	0.782689	-0.66219	-0.13028	-0.153336	-0.0161564	0.0812489	0.0103542	-0.00913019
GRSM_FRAM	0.761421	-0.487716	-0.358354	0.208179	0.0447334	0.100675	0.00509536	0.002329
GRSM_HACA	0.860321	-0.701566	0.2114	-0.245598	-0.0877671	0.0304699	0.0473627	-0.000837547
GRSM_ILOP	0.827553	-0.73974	-0.00313947	-0.194817	-0.0775119	0.0369958	0.0260755	-0.00769237
GRSM_JUNI	0.682674	-0.596441	-0.76275	-0.0100094	0.0737421	-0.0148044	-0.0201182	0.00765974
GRSM_LIBE	0.765121	-0.568826	-0.462457	0.228567	-0.100296	0.00177608	0.0294128	0.000322355
GRSM_LITU	0.788112	-0.62879	-0.22278	0.0876516	-0.0927156	0.0219058	0.0101577	-0.0147963
GRSM_MATR	0.798364	-0.625789	-0.185461	0.0868864	-0.109696	0.0108081	0.0285519	-0.0116848
GRSM_OXAR	0.841858	-0.670703	0.0299677	-0.0460326	-0.141099	0.018359	0.0465152	-0.00519925
GRSM_PLOC	0.719514	-0.68137	-0.746149	0.111767	-0.116411	-0.145805	-0.0141755	0.0119046
GRSM_PRSE	0.694203	-0.634138	-0.205563	-0.546618	0.175641	0.108236	-0.0615081	0.0236172
GRSM_QURU	0.736255	-0.382712	-0.501073	0.444182	0.149841	0.0754171	-0.0232076	-0.0158032
GRSM_RHMA	0.807787	-0.401877	-0.0560574	0.218175	-0.0117981	0.188859	0.116501	0.00518004
GRSM_RHTY	0.705869	-0.331403	-0.943039	0.643291	0.0936086	0.0358332	0.0518985	0.0115607
GRSM_ROPS	0.641554	-0.610816	-0.823223	-0.206536	0.0560406	-0.0435379	-0.122443	0.0262855
GRSM_SAAL	0.769763	-0.621162	-0.516661	0.261212	-0.174151	-0.0685493	0.0254066	-0.00148974
GRSM_TIAM	0.717558	-0.484462	-0.497923	0.110684	0.143496	0.127619	0.00630247	0.00279628
GRSM_TSCA	0.779536	-0.305847	-0.257093	0.517614	0.135832	0.142794	0.0179172	-0.01826
GRSM_ULRU	0.731721	-0.545715	-0.566848	0.144685	0.0427128	0.0377632	0.0195895	-0.00622643
NIWO_ABLA	0.442044	0.152523	-1.51671	-0.572982	0.202877	-0.247803	0.0571006	0.079306
NIWO_DAFR	0.454165	0.15676	-1.7566	-0.0949016	0.788371	-0.421714	0.0426653	0.0538704
NIWO_JUCO	0.569034	0.0605997	-1.08754	-0.0879675	0.519139	-0.148703	-0.0346705	0.0242344
NIWO_LOIN	0.45736	-0.0916844	-1.41918	-0.469376	-0.0542081	0.0347946	-0.0310996	0.0225546
NIWO_PIEN	0.381917	-0.0112984	-1.4757	-0.958169	0.397829	-0.0428441	0.134761	0.0290059
NIWO_PICO	0.437261	-0.0997121	-1.54369	-0.535797	-0.236777	0.0688771	-0.115438	0.00209745
NIWO_PIFL	0.2247	-0.274033	-2.20438	-1.12257	0.43163	-0.193306	0.073363	-0.0117043
NIWO_POTR	0.501963	-0.184346	-1.25206	-0.388337	0.543896	0.0568383	-0.0279673	0.0641796
NIWO_RIMO	0.272963	0.0882118	-1.95721	-1.0911	0.385907	-0.376769	0.16163	-0.0183184
NIWO_RUID	0.570975	-0.0771524	-1.14797	0.218867	0.563249	-0.165355	-0.0641681	0.0661951
NIWO_VAMY	0.39107	0.0817832	-1.48061	-1.01201	0.567845	-0.0500111	0.209172	0.00202106

## Sheet: Table_S7
Table S7	Correlation matrix for 59 traits across 328 species-site combinations, including 246 unique woody species sampled from 16 ecosystems across the continental U.S.A and northern Mexico, against eight climate variables for the mean of species’ native ranges— mean annual precipitation (MAP), mean annual temperature (MAT), mean annual aridity index (MAAI), potential evapotranspiration (PET), growing se…
	e_avg_um2	s_avg_um2	d_sum_sto.mm.2	gmax_sum_mol.m.2.s.1	t_avg_tri.mm.2	SR_unitless	LA_cm2	LMA_g.m.2	LTH_mm	LD_g.cm.3	LDMC_g.g.1	SWC_g.g.1	SWMA_g.m.2	PLAdry_.	PLTHdry_.	PA_LA	PA.Drymass_cm2.g.1	PMA_g.cm.2	WD_g.cm.3	HuberValue_unitless	BarkThicknessStemDiameterRatio	Cmass_mg.g.1	Narea_g.m.2	Nmass_mg.g.1	Parea_g.m.2	Pmass_mg.g.1	Kmass_mg.g.1	Camass_mg.g.1	Mgmass_mg.g.1	Femass_mg.g.1	Bmass_mg.g.1	Mnmass_mg.g.1	Namass_mg.g.1	Znmass_mg.g.1	Cumass_mg.g.1	Momass_mg.g.1	Comass_mg.g.1	Almass_mg.g.1	Asmass_mg.g.1	Cdmass_mg.g.1	Rbmass_mg.g.1	Srmass_mg.g.1	Semass_mg.g.1	Nimass_mg.g.1	Chlarea_SPAD	N_P	C_N	SPAD_Narea	D13C_permil
e_avg_um2	1***; 1***; 1***	0.42***; 0.12*; 0.19**	-0.18***; -0.37***; -0.5***	-0.08ns; -0.35***; -0.43***	-0.13*; -0.26***; -0.46***	0.48***; 0.37***; 0.36***	-0.28***; -0.05ns; -0.3***	0.2***; 0.33***; 0.21***	0.34***; 0.31***; 0.36***	-0.29***; -0.24***; -0.12*	-0.16**; -0.12*; -0.21***	0.22***; 0.13*; 0.2***	0.38***; 0.43***; 0.39***	0.22***; 0.08ns; 0.07ns	0.09ns; 0ns; 0ns	0.27***; 0ns; -0.04ns	0.27***; -0.01ns; -0.05ns	0.26***; 0.16*; -0.03ns	-0.23***; -0.2***; -0.19**	0.13*; 0.14ns; 0.18ns	0.09ns; 0.34***; 0.16**	0.06ns; 0.07ns; 0.01ns	0.14*; 0.15*; 0.07ns	-0.15**; -0.24***; -0.27***	0.3***; 0.23***; 0.22***	0.16**; -0.02ns; 0.03ns	0.12*; 0.01ns; 0ns	0.07ns; -0.09ns; -0.12*	-0.12*; -0.12*; -0.12*	0.09ns; 0.06ns; 0.01ns	0.12*; -0.02ns; -0.01ns	-0.03ns; 0.01ns; 0.03ns	0.18**; 0.03ns; 0.06ns	0.18**; 0ns; 0.1ns	-0.12*; -0.24***; -0.26***	0.15**; 0.12*; 0.05ns	0.3***; 0.08ns; 0.23***	0.33***; 0.06ns; 0.3***	0.23***; 0.06ns; 0.11ns	0.27***; 0.02ns; 0.16**	-0.05ns; -0.1ns; -0.1ns	0.16**; 0.08ns; 0ns	0.22***; 0.09ns; 0.16*	0.21***; 0.03ns; 0.05ns	0.14*; 0.2***; 0.13*	-0.26***; -0.28***; -0.28***	0.2***; 0.33***; 0.25***	0.25***; 0.07ns; 0.1ns	-0.06ns; -0.11ns; -0.07ns
s_avg_um2	0.42***; 0.12*; 0.19**	1***; 1***; 1***	-0.05ns; -0.3***; -0.3***	0.29***; 0.05ns; 0.11ns	0.15**; -0.09ns; -0.03ns	0.35***; 0.19***; 0.13*	-0.11*; -0.07ns; -0.07ns	0.29***; 0.25***; 0.24***	0.33***; 0.12*; 0.22***	-0.04ns; 0ns; 0ns	0.03ns; 0.02ns; 0.01ns	0.03ns; 0ns; 0ns	0.35***; 0.3***; 0.29***	0.15**; 0.07ns; 0.03ns	0.11*; 0.01ns; 0.12ns	0.13*; -0.06ns; 0.09ns	0ns; -0.12ns; -0.1ns	0.1ns; -0.08ns; -0.01ns	0.09ns; 0.13*; 0.13*	-0.04ns; 0.16ns; 0.13ns	0.02ns; -0.04ns; -0.03ns	0.11*; 0.1ns; 0.09ns	0.3***; 0.22***; 0.21***	-0.08ns; -0.16**; -0.13*	0.3***; 0.21***; 0.2***	0.1ns; -0.05ns; -0.04ns	0.1ns; 0.08ns; 0.04ns	0.13*; -0.04ns; 0.06ns	-0.08ns; -0.1ns; -0.1ns	0.07ns; 0.04ns; 0ns	0.11*; 0.16**; 0.11ns	-0.15**; -0.06ns; -0.16**	0.21***; 0.18**; 0.16**	0.18**; 0.04ns; 0.13*	-0.07ns; -0.1ns; -0.11ns	0.11*; 0.03ns; 0.02ns	0.21***; -0.03ns; 0.12*	0.05ns; 0.02ns; -0.01ns	0.17**; 0.07ns; 0.07ns	0.23***; -0.06ns; 0.13*	-0.07ns; -0.1ns; -0.11ns	0.16**; 0.01ns; 0.05ns	0.18**; 0.08ns; 0.03ns	0.19***; -0.04ns; 0.02ns	0.09ns; -0.03ns; -0.07ns	-0.1ns; -0.08ns; -0.05ns	0.18***; 0.17**; 0.14*	0.25***; 0.06ns; 0.12*	-0.08ns; -0.11ns; -0.1ns
d_sum_sto.mm.2	-0.18***; -0.37***; -0.5***	-0.05ns; -0.3***; -0.3***	1***; 1***; 1***	0.89***; 0.91***; 0.91***	0.39***; 0.26***; 0.25***	0.11*; -0.18**; -0.16**	0.16**; 0.21***; 0.25***	0.06ns; -0.12*; -0.04ns	-0.01ns; -0.15**; -0.16**	0.18**; 0.2***; 0.1ns	0.25***; 0.25***; 0.24***	-0.19***; -0.21***; -0.23***	-0.08ns; -0.23***; -0.2***	-0.11*; -0.11ns; -0.22***	-0.05ns; -0.13*; -0.09ns	0ns; -0.02ns; 0.05ns	-0.06ns; -0.01ns; 0ns	-0.02ns; -0.05ns; -0.03ns	0.21***; 0.2***; 0.11ns	-0.1ns; -0.12ns; -0.15ns	0.06ns; -0.01ns; 0.03ns	0.09ns; 0.03ns; 0.05ns	0.12*; -0.02ns; 0.06ns	0.08ns; 0.07ns; 0.15**	-0.02ns; -0.18**; -0.14*	-0.08ns; -0.17**; -0.13*	-0.07ns; -0.16**; -0.1ns	-0.08ns; 0ns; -0.1ns	-0.02ns; 0.09ns; 0.08ns	0ns; -0.1ns; -0.08ns	-0.02ns; -0.05ns; -0.01ns	0.08ns; 0.06ns; 0.19**	-0.04ns; -0.05ns; -0.1ns	-0.09ns; -0.07ns; -0.12*	0.07ns; 0.07ns; 0.17**	-0.02ns; -0.1ns; -0.1ns	-0.11*; -0.08ns; -0.21***	-0.15**; -0.02ns; -0.2***	-0.07ns; -0.1ns; -0.15*	-0.04ns; -0.06ns; -0.12*	-0.01ns; 0.02ns; 0.07ns	-0.14*; -0.24***; -0.26***	-0.06ns; -0.01ns; -0.09ns	-0.04ns; -0.11ns; -0.04ns	-0.05ns; -0.1ns; -0.12*	0.15**; 0.28***; 0.28***	-0.01ns; -0.14*; -0.13*	-0.1ns; -0.26***; -0.25***	-0.01ns; 0.06ns; 0.06ns
gmax_sum_mol.m.2.s.1	-0.08ns; -0.35***; -0.43***	0.29***; 0.05ns; 0.11ns	0.89***; 0.91***; 0.91***	1***; 1***; 1***	0.36***; 0.27***; 0.23***	0.16**; -0.15*; -0.11*	0.14**; 0.15**; 0.24***	0.17**; -0.05ns; 0.04ns	0.1ns; -0.12*; -0.08ns	0.17**; 0.21***; 0.1ns	0.26***; 0.27***; 0.23***	-0.19***; -0.21***; -0.23***	0.05ns; -0.14*; -0.09ns	-0.12*; -0.1ns; -0.22***	-0.02ns; -0.13*; -0.04ns	0.07ns; -0.05ns; 0.11ns	-0.05ns; -0.06ns; -0.03ns	-0.01ns; -0.08ns; -0.04ns	0.24***; 0.26***; 0.16**	-0.11*; -0.07ns; -0.1ns	0.07ns; -0.01ns; 0.01ns	0.14*; 0.09ns; 0.08ns	0.23***; 0.05ns; 0.15*	0.04ns; 0.04ns; 0.12*	0.06ns; -0.13*; -0.07ns	-0.09ns; -0.19**; -0.15*	-0.06ns; -0.14*; -0.08ns	-0.06ns; -0.06ns; -0.08ns	-0.06ns; 0.05ns; 0.05ns	-0.02ns; -0.08ns; -0.08ns	0.05ns; 0ns; 0.05ns	0.04ns; 0.05ns; 0.14*	0.01ns; 0.01ns; -0.04ns	-0.01ns; -0.07ns; -0.06ns	0.02ns; 0.04ns; 0.13*	-0.02ns; -0.1ns; -0.09ns	-0.06ns; -0.1ns; -0.16**	-0.14*; -0.01ns; -0.22***	-0.04ns; -0.07ns; -0.12*	0.03ns; -0.08ns; -0.07ns	-0.02ns; 0.02ns; 0.03ns	-0.12*; -0.25***; -0.25***	0ns; 0.02ns; -0.09ns	0.02ns; -0.12ns; -0.03ns	-0.02ns; -0.14*; -0.15**	0.15**; 0.28***; 0.27***	0.04ns; -0.11ns; -0.09ns	-0.04ns; -0.24***; -0.21***	-0.05ns; 0.03ns; 0.02ns
t_avg_tri.mm.2	-0.13*; -0.26***; -0.46***	0.15**; -0.09ns; -0.03ns	0.39***; 0.26***; 0.25***	0.36***; 0.27***; 0.23***	1***; 1***; 1***	0.19***; -0.05ns; -0.06ns	-0.02ns; -0.08ns; 0.07ns	-0.02ns; -0.01ns; -0.15*	0.01ns; -0.03ns; -0.16**	0.07ns; 0.07ns; -0.03ns	0.05ns; 0.23***; 0.03ns	0.02ns; -0.08ns; 0ns	-0.04ns; -0.06ns; -0.18**	0.3***; 0.09ns; 0.22***	0.1ns; -0.05ns; 0.08ns	-0.15**; 0ns; 0.01ns	-0.18***; -0.02ns; 0.01ns	-0.03ns; -0.04ns; 0.05ns	0.21***; 0.09ns; 0.13*	-0.09ns; 0.13ns; 0.08ns	-0.03ns; 0.02ns; -0.09ns	-0.03ns; 0.04ns; -0.11ns	0.19***; 0.15**; 0.11ns	0.28***; 0.1ns; 0.4***	0.13*; 0.02ns; -0.03ns	0.23***; 0ns; 0.17**	0.24***; 0.01ns; 0.23***	0.23***; 0.01ns; 0.21***	-0.08ns; -0.09ns; -0.05ns	0.42***; 0.13*; 0.38***	0.19***; 0.03ns; 0.2***	-0.18**; -0.07ns; -0.19***	0.22***; -0.02ns; 0.1ns	0.04ns; -0.06ns; -0.04ns	0.18***; -0.04ns; 0.21***	0.29***; 0.1ns; 0.24***	0.21***; 0ns; 0.13*	0ns; -0.05ns; -0.07ns	0.26***; 0.03ns; 0.2***	0.17**; 0.03ns; 0.1ns	-0.02ns; 0ns; 0ns	0.24***; 0.1ns; 0.21***	0.2***; -0.02ns; 0.07ns	0.21***; -0.05ns; 0.08ns	-0.04ns; -0.04ns; -0.13*	0.05ns; 0.07ns; 0.15**	-0.18***; -0.15*; -0.39***	0.14*; 0.04ns; 0.09ns	-0.11ns; -0.12*; -0.1ns
SR_unitless	0.48***; 0.37***; 0.36***	0.35***; 0.19***; 0.13*	0.11*; -0.18**; -0.16**	0.16**; -0.15*; -0.11*	0.19***; -0.05ns; -0.06ns	1***; 1***; 1***	-0.5***; -0.13*; -0.56***	0.49***; 0.51***; 0.5***	0.64***; 0.44***; 0.63***	-0.21***; -0.18**; -0.16**	0ns; -0.08ns; -0.11ns	0.08ns; 0.16**; 0.12*	0.59***; 0.67***; 0.63***	0.27***; 0.13*; 0.09ns	0.12*; -0.05ns; -0.1ns	0.34***; 0.2**; 0.16*	0.21***; 0.16*; -0.03ns	0.42***; 0.04ns; 0.11ns	0.01ns; -0.01ns; -0.04ns	-0.05ns; 0.18ns; 0.14ns	0.05ns; 0.17**; 0.08ns	0.09ns; -0.02ns; -0.03ns	0.52***; 0.6***; 0.55***	-0.1ns; -0.09ns; -0.15**	0.59***; 0.5***; 0.53***	0.25***; 0.12*; 0.14*	0.19***; 0.26***; 0.13*	0.1ns; -0.06ns; -0.11ns	-0.26***; -0.24***; -0.34***	0.31***; 0.18**; 0.24***	0.15**; 0.14*; 0.11ns	-0.14**; -0.15*; -0.19***	0.42***; 0.29***; 0.43***	0.23***; -0.02ns; 0.11ns	-0.15**; -0.21***; -0.28***	0.21***; 0.18**; 0.1ns	0.43***; 0.08ns; 0.34***	0.34***; -0.03ns; 0.24***	0.37***; 0.18**; 0.25***	0.41***; 0.14*; 0.34***	-0.12*; -0.2***; -0.19***	0.22***; 0.05ns; 0.04ns	0.35***; 0.01ns; 0.12ns	0.28***; -0.1ns; -0.2**	0.31***; 0.27***; 0.2***	-0.27***; -0.34***; -0.32***	0.17**; 0.17**; 0.14*	0.43***; 0.23***; 0.34***	-0.36***; -0.42***; -0.42***
LA_cm2	-0.28***; -0.05ns; -0.3***	-0.11*; -0.07ns; -0.07ns	0.16**; 0.21***; 0.25***	0.14**; 0.15**; 0.24***	-0.02ns; -0.08ns; 0.07ns	-0.5***; -0.13*; -0.56***	1***; 1***; 1***	-0.56***; -0.17**; -0.58***	-0.59***; -0.12*; -0.6***	0.07ns; -0.01ns; -0.01ns	-0.11*; 0.04ns; -0.14*	0.16**; -0.06ns; 0.14*	-0.56***; -0.21***; -0.57***	0ns; -0.03ns; 0.03ns	0.03ns; -0.01ns; 0.18**	0.03ns; 0.04ns; 0.3***	0.2***; 0.08ns; 0.56***	-0.54***; -0.13*; -0.57***	-0.12*; 0.2***; -0.16**	0.02ns; -0.18ns; -0.01ns	-0.02ns; -0.09ns; -0.14*	-0.3***; -0.23***; -0.29***	-0.45***; -0.18**; -0.49***	0.35***; 0.06ns; 0.38***	-0.56***; -0.22***; -0.6***	-0.11ns; -0.11*; -0.12*	0.1ns; 0ns; 0.11ns	0.15**; 0.17**; 0.21***	0.49***; 0.22***; 0.56***	-0.2***; -0.13*; -0.24***	0.01ns; -0.05ns; 0.03ns	0.12*; 0.05ns; 0.15**	-0.45***; -0.04ns; -0.43***	-0.22***; -0.06ns; -0.13*	0.28***; 0.16**; 0.35***	-0.01ns; -0.08ns; -0.03ns	-0.38***; -0.04ns; -0.37***	-0.3***; 0.25***; -0.16**	-0.2***; 0.13*; -0.16**	-0.34***; -0.05ns; -0.34***	0.21***; -0.04ns; 0.26***	-0.14*; -0.01ns; -0.12*	-0.3***; 0.37***; 0.16*	-0.32***; 0.09ns; 0.12ns	-0.29***; -0.01ns; -0.14*	0.42***; 0.22***; 0.48***	-0.31***; -0.14*; -0.41***	-0.47***; -0.2***; -0.44***	0.45***; 0.21***; 0.44***
LMA_g.m.2	0.2***; 0.33***; 0.21***	0.29***; 0.25***; 0.24***	0.06ns; -0.12*; -0.04ns	0.17**; -0.05ns; 0.04ns	-0.02ns; -0.01ns; -0.15*	0.49***; 0.51***; 0.5***	-0.56***; -0.17**; -0.58***	1***; 1***; 1***	0.86***; 0.43***; 0.82***	0.28***; 0.28***; 0.2***	0.53***; 0.47***; 0.49***	-0.46***; -0.39***; -0.49***	0.83***; 0.78***; 0.82***	-0.2***; -0.15**; -0.28***	-0.03ns; -0.12*; -0.28***	0.38***; 0.18**; 0.18**	0.03ns; 0.05ns; -0.35***	0.55***; 0.1ns; 0.31***	0.25***; 0.17**; 0.26***	-0.1ns; 0.09ns; 0.02ns	0.26***; 0.41***; 0.3***	0.43***; 0.38***; 0.37***	0.81***; 0.7***; 0.81***	-0.57***; -0.6***; -0.67***	0.72***; 0.65***; 0.73***	-0.11*; -0.2***; -0.24***	-0.32***; -0.31***; -0.42***	-0.11ns; -0.18**; -0.24***	-0.49***; -0.41***; -0.6***	-0.1ns; -0.09ns; -0.13*	-0.1ns; -0.04ns; -0.15**	-0.1ns; -0.13*; -0.18**	0.3***; 0.06ns; 0.27***	0.1ns; -0.08ns; -0.02ns	-0.43***; -0.45***; -0.55***	-0.11*; -0.02ns; -0.18**	0.28***; -0.02ns; 0.22***	0.1ns; -0.08ns; 0.02ns	0.05ns; -0.04ns; -0.02ns	0.28***; -0.01ns; 0.21***	-0.33***; -0.33***; -0.43***	0.06ns; -0.04ns; -0.05ns	0.26***; -0.06ns; -0.16*	0.24***; -0.2**; -0.24***	0.57***; 0.48***; 0.45***	-0.25***; -0.35***; -0.32***	0.65***; 0.73***; 0.69***	0.54***; 0.22***; 0.43***	-0.5***; -0.47***; -0.53***
LTH_mm	0.34***; 0.31***; 0.36***	0.33***; 0.12*; 0.22***	-0.01ns; -0.15**; -0.16**	0.1ns; -0.12*; -0.08ns	0.01ns; -0.03ns; -0.16**	0.64***; 0.44***; 0.63***	-0.59***; -0.12*; -0.6***	0.86***; 0.43***; 0.82***	1***; 1***; 1***	-0.16**; -0.26***; -0.28***	0.29***; -0.01ns; 0.15**	-0.21***; 0.2***; -0.15**	0.86***; 0.57***; 0.84***	0.08ns; 0.1ns; 0.05ns	0.04ns; 0.06ns; -0.13*	0.41***; 0.04ns; 0.17**	0.13*; 0ns; -0.25***	0.57***; 0.03ns; 0.27***	0.13*; 0.03ns; 0.09ns	-0.12*; 0.29**; 0.26**	0.26***; 0.31***; 0.34***	0.31***; -0.1ns; 0.16**	0.73***; 0.3***; 0.68***	-0.45***; -0.27***; -0.53***	0.73***; 0.3***; 0.68***	0.01ns; -0.01ns; -0.08ns	-0.13*; 0.08ns; -0.2***	-0.01ns; 0.04ns; -0.13*	-0.43***; -0.13*; -0.51***	0.06ns; 0.03ns; 0.02ns	-0.09ns; 0.03ns; -0.14*	-0.15**; -0.1ns; -0.24***	0.36***; 0.3***; 0.33***	0.16**; -0.06ns; 0ns	-0.41***; -0.27***; -0.56***	0.03ns; 0.07ns; -0.03ns	0.37***; 0.02ns; 0.29***	0.23***; -0.04ns; 0.12*	0.19***; 0.04ns; 0.09ns	0.34***; -0.02ns; 0.23***	-0.32***; -0.19***; -0.41***	0.2***; 0.15**; 0.07ns	0.33***; -0.02ns; -0.05ns	0.25***; -0.2**; -0.34***	0.59***; 0.17**; 0.42***	-0.29***; -0.26***; -0.38***	0.52***; 0.31***; 0.52***	0.58***; 0.16**; 0.44***	-0.54***; -0.28***; -0.56***
LD_g.cm.3	-0.29***; -0.24***; -0.12*	-0.04ns; 0ns; 0ns	0.18**; 0.2***; 0.1ns	0.17**; 0.21***; 0.1ns	0.07ns; 0.07ns; -0.03ns	-0.21***; -0.18**; -0.16**	0.07ns; -0.01ns; -0.01ns	0.28***; 0.28***; 0.2***	-0.16**; -0.26***; -0.28***	1***; 1***; 1***	0.53***; 0.44***; 0.3***	-0.48***; -0.47***; -0.27***	-0.02ns; -0.02ns; 0.04ns	-0.5***; -0.57***; -0.61***	-0.1ns; -0.15*; -0.09ns	-0.04ns; 0.12ns; 0.08ns	-0.19***; 0.06ns; -0.05ns	-0.02ns; -0.03ns; 0.01ns	0.3***; 0.26***; 0.22***	0.05ns; -0.51***; -0.42***	-0.01ns; -0.05ns; -0.06ns	0.22***; 0.28***; 0.31***	0.22***; 0.24***; 0.18**	-0.19***; -0.25***; -0.11*	0.06ns; 0.17**; 0.12*	-0.16**; -0.21***; -0.08ns	-0.29***; -0.31***; -0.2***	-0.12*; -0.16**; -0.19***	-0.11*; -0.13*; -0.16**	-0.21***; -0.09ns; -0.18**	0ns; 0.09ns; 0.14*	0.03ns; 0.01ns; 0.14*	-0.01ns; -0.06ns; 0ns	-0.09ns; -0.01ns; 0.03ns	-0.02ns; -0.04ns; 0.18**	-0.18***; -0.08ns; -0.15**	-0.11*; -0.09ns; 0.03ns	-0.25***; 0.04ns; -0.04ns	-0.2***; -0.05ns; -0.1ns	-0.02ns; -0.01ns; 0.08ns	-0.05ns; -0.01ns; 0.18**	-0.15**; -0.16**; -0.22***	-0.07ns; -0.05ns; -0.15*	0ns; 0.05ns; 0.44***	-0.02ns; -0.01ns; -0.05ns	0.06ns; 0.02ns; -0.01ns	0.24***; 0.15**; 0.16**	-0.03ns; 0.02ns; 0.07ns	0.06ns; 0.08ns; 0.2***
LDMC_g.g.1	-0.16**; -0.12*; -0.21***	0.03ns; 0.02ns; 0.01ns	0.25***; 0.25***; 0.24***	0.26***; 0.27***; 0.23***	0.05ns; 0.23***; 0.03ns	0ns; -0.08ns; -0.11ns	-0.11*; 0.04ns; -0.14*	0.53***; 0.47***; 0.49***	0.29***; -0.01ns; 0.15**	0.53***; 0.44***; 0.3***	1***; 1***; 1***	-0.92***; -0.9***; -0.97***	0.05ns; -0.06ns; -0.06ns	-0.43***; -0.23***; -0.4***	-0.22***; -0.31***; -0.43***	0.04ns; -0.1ns; -0.16*	-0.18***; -0.16**; -0.43***	0.41***; 0.06ns; 0.32***	0.45***; 0.46***; 0.49***	-0.07ns; 0.04ns; -0.1ns	0.19***; 0.19**; 0.16**	0.39***; 0.4***; 0.4***	0.29***; 0.21***; 0.24***	-0.51***; -0.56***; -0.53***	0.14**; 0.16**; 0.14*	-0.41***; -0.41***; -0.46***	-0.55***; -0.6***; -0.61***	-0.2***; -0.18**; -0.21***	-0.26***; -0.28***; -0.29***	-0.26***; -0.15**; -0.27***	-0.25***; -0.22***; -0.26***	0.13*; 0.01ns; 0.15**	-0.14**; -0.13*; -0.18**	-0.1ns; -0.09ns; -0.12*	-0.31***; -0.3***; -0.3***	-0.34***; -0.26***; -0.4***	-0.04ns; -0.14*; -0.08ns	-0.09ns; -0.01ns; -0.07ns	-0.16**; -0.08ns; -0.15**	-0.07ns; -0.16**; -0.12*	-0.26***; -0.21***; -0.25***	-0.11ns; -0.12*; -0.15**	-0.06ns; 0.07ns; -0.14ns	-0.05ns; -0.19*; -0.15*	0.24***; 0.16**; 0.16**	0.03ns; 0.05ns; 0.06ns	0.57***; 0.5***; 0.56***	0.14*; -0.04ns; 0ns	-0.17**; -0.2***; -0.17**
SWC_g.g.1	0.22***; 0.13*; 0.2***	0.03ns; 0ns; 0ns	-0.19***; -0.21***; -0.23***	-0.19***; -0.21***; -0.23***	0.02ns; -0.08ns; 0ns	0.08ns; 0.16**; 0.12*	0.16**; -0.06ns; 0.14*	-0.46***; -0.39***; -0.49***	-0.21***; 0.2***; -0.15**	-0.48***; -0.47***; -0.27***	-0.92***; -0.9***; -0.97***	1***; 1***; 1***	0.03ns; 0.15**; 0.07ns	0.48***; 0.3***; 0.39***	0.29***; 0.34***; 0.45***	0.01ns; 0.11ns; 0.18**	0.22***; 0.15*; 0.45***	-0.39***; -0.08ns; -0.34***	-0.44***; -0.45***; -0.48***	0.04ns; 0.07ns; 0.07ns	-0.21***; -0.14*; -0.18**	-0.34***; -0.4***; -0.38***	-0.2***; -0.13*; -0.23***	0.55***; 0.56***; 0.55***	-0.06ns; -0.09ns; -0.14*	0.47***; 0.44***; 0.47***	0.61***; 0.66***; 0.62***	0.26***; 0.21***; 0.21***	0.3***; 0.27***; 0.28***	0.32***; 0.17**; 0.28***	0.31***; 0.25***; 0.28***	-0.09ns; -0.01ns; -0.16**	0.22***; 0.18**; 0.19***	0.15**; 0.08ns; 0.12*	0.35***; 0.26***; 0.31***	0.4***; 0.32***; 0.41***	0.1ns; 0.17**; 0.07ns	0.13*; -0.02ns; 0.07ns	0.19***; 0.12*; 0.16**	0.15**; 0.17**; 0.13*	0.3***; 0.17**; 0.26***	0.18**; 0.18**; 0.14*	0.09ns; -0.04ns; 0.13ns	0.09ns; 0.15*; 0.17*	-0.19***; -0.16**; -0.18**	0.01ns; -0.09ns; -0.06ns	-0.5***; -0.46***; -0.58***	-0.06ns; 0.08ns; 0.01ns	0.19***; 0.12*; 0.17**
SWMA_g.m.2	0.38***; 0.43***; 0.39***	0.35***; 0.3***; 0.29***	-0.08ns; -0.23***; -0.2***	0.05ns; -0.14*; -0.09ns	-0.04ns; -0.06ns; -0.18**	0.59***; 0.67***; 0.63***	-0.56***; -0.21***; -0.57***	0.83***; 0.78***; 0.82***	0.86***; 0.57***; 0.84***	-0.02ns; -0.02ns; 0.04ns	0.05ns; -0.06ns; -0.06ns	0.03ns; 0.15**; 0.07ns	1***; 1***; 1***	0.05ns; -0.03ns; -0.06ns	0.12*; 0ns; -0.05ns	0.43***; 0.07ns; 0.3***	0.15**; -0.07ns; -0.15*	0.39***; 0.06ns; 0.11ns	0ns; -0.03ns; -0.02ns	-0.08ns; 0.1ns; 0.07ns	0.2***; 0.33***; 0.24***	0.29***; 0.14*; 0.18***	0.78***; 0.71***; 0.76***	-0.34***; -0.32***; -0.42***	0.78***; 0.67***; 0.76***	0.13*; 0.02ns; 0.02ns	-0.02ns; 0.07ns; -0.09ns	0.01ns; -0.09ns; -0.14*	-0.42***; -0.35***; -0.52***	0.07ns; 0.03ns; 0.02ns	0.03ns; 0.15**; 0ns	-0.2***; -0.19***; -0.31***	0.45***; 0.23***; 0.44***	0.18***; -0.03ns; 0.05ns	-0.31***; -0.33***; -0.45***	0.1ns; 0.21***; 0.06ns	0.37***; 0.1ns; 0.31***	0.2***; -0.08ns; 0.07ns	0.16**; 0.07ns; 0.08ns	0.39***; 0.11*; 0.33***	-0.23***; -0.27***; -0.33***	0.17**; 0.06ns; 0.03ns	0.36***; -0.08ns; -0.11ns	0.34***; -0.16*; -0.19**	0.52***; 0.45***; 0.4***	-0.33***; -0.41***; -0.42***	0.44***; 0.44***; 0.43***	0.58***; 0.28***; 0.49***	-0.45***; -0.43***; -0.48***
PLAdry_.	0.22***; 0.08ns; 0.07ns	0.15**; 0.07ns; 0.03ns	-0.11*; -0.11ns; -0.22***	-0.12*; -0.1ns; -0.22***	0.3***; 0.09ns; 0.22***	0.27***; 0.13*; 0.09ns	0ns; -0.03ns; 0.03ns	-0.2***; -0.15**; -0.28***	0.08ns; 0.1ns; 0.05ns	-0.5***; -0.57***; -0.61***	-0.43***; -0.23***; -0.4***	0.48***; 0.3***; 0.39***	0.05ns; -0.03ns; -0.06ns	1***; 1***; 1***	0.21***; 0.05ns; 0.14*	0.02ns; -0.02ns; -0.03ns	0.11*; 0.02ns; 0.14*	-0.03ns; 0ns; 0ns	-0.21***; -0.15**; -0.2***	-0.1ns; 0.35***; 0.33***	-0.08ns; -0.03ns; -0.06ns	-0.3***; -0.22***; -0.31***	0ns; -0.07ns; -0.11ns	0.36***; 0.23***; 0.34***	0.08ns; -0.06ns; -0.07ns	0.35***; 0.13*; 0.27***	0.47***; 0.28***; 0.43***	0.35***; 0.25***; 0.34***	0.07ns; 0.13*; 0.12*	0.42***; 0.12*; 0.34***	0.17**; 0ns; 0.08ns	-0.27***; -0.12*; -0.27***	0.18**; -0.01ns; 0.05ns	0.13*; -0.03ns; 0.08ns	0.08ns; -0.06ns; 0.02ns	0.43***; 0.18**; 0.35***	0.18***; 0.03ns; 0.08ns	0.12*; -0.02ns; 0.03ns	0.31***; 0.02ns; 0.22***	0.14*; 0.01ns; 0.03ns	-0.04ns; -0.12*; -0.09ns	0.35***; 0.19***; 0.32***	0.21***; 0.09ns; 0.27***	0.08ns; -0.15*; -0.2**	0.06ns; 0.05ns; 0ns	-0.05ns; 0.03ns; -0.01ns	-0.35***; -0.17**; -0.37***	0.12*; -0.05ns; 0.04ns	-0.17**; -0.19***; -0.15*
PLTHdry_.	0.09ns; 0ns; 0ns	0.11*; 0.01ns; 0.12ns	-0.05ns; -0.13*; -0.09ns	-0.02ns; -0.13*; -0.04ns	0.1ns; -0.05ns; 0.08ns	0.12*; -0.05ns; -0.1ns	0.03ns; -0.01ns; 0.18**	-0.03ns; -0.12*; -0.28***	0.04ns; 0.06ns; -0.13*	-0.1ns; -0.15*; -0.09ns	-0.22***; -0.31***; -0.43***	0.29***; 0.34***; 0.45***	0.12*; 0ns; -0.05ns	0.21***; 0.05ns; 0.14*	1***; 1***; 1***	0.15**; 0.06ns; 0.1ns	0.13*; 0.05ns; 0.2**	0.05ns; -0.03ns; -0.16*	0.03ns; -0.04ns; -0.07ns	-0.03ns; -0.11ns; 0.04ns	-0.03ns; -0.12ns; -0.17*	-0.13*; -0.09ns; -0.14*	0.15**; -0.13*; -0.17**	0.28***; 0.28***; 0.33***	0.19***; -0.06ns; -0.12*	0.35***; 0.29***; 0.24***	0.45***; 0.32***; 0.37***	0.41***; 0.08ns; 0.23***	0.08ns; 0.02ns; 0.12ns	0.32***; 0.23***; 0.25***	0.43***; 0.18**; 0.28***	-0.1ns; -0.04ns; -0.14*	0.24***; 0.1ns; 0.12*	0.22***; 0.04ns; 0.06ns	0.23***; 0.16**; 0.14*	0.44***; 0.12*; 0.3***	0.34***; 0.07ns; 0.15*	0.11*; -0.02ns; 0.02ns	0.29***; 0.09ns; 0.17**	0.32***; 0.01ns; 0.15*	-0.05ns; 0.05ns; 0.04ns	0.28***; 0.05ns; 0.11ns	0.22***; 0.08ns; 0.1ns	0.21***; 0.07ns; 0.11ns	0.02ns; -0.1ns; -0.09ns	0ns; -0.08ns; 0.02ns	-0.24***; -0.21***; -0.33***	0.18**; 0.26***; 0.16**	-0.09ns; 0.08ns; 0.1ns
PA_LA	0.27***; 0ns; -0.04ns	0.13*; -0.06ns; 0.09ns	0ns; -0.02ns; 0.05ns	0.07ns; -0.05ns; 0.11ns	-0.15**; 0ns; 0.01ns	0.34***; 0.2**; 0.16*	0.03ns; 0.04ns; 0.3***	0.38***; 0.18**; 0.18**	0.41***; 0.04ns; 0.17**	-0.04ns; 0.12ns; 0.08ns	0.04ns; -0.1ns; -0.16*	0.01ns; 0.11ns; 0.18**	0.43***; 0.07ns; 0.3***	0.02ns; -0.02ns; -0.03ns	0.15**; 0.06ns; 0.1ns	1***; 1***; 1***	0.9***; 0.97***; 0.84***	0.23***; -0.04ns; -0.42***	-0.13*; -0.08ns; -0.14*	0ns; 0.07ns; 0.22*	0.24***; -0.02ns; -0.03ns	0.06ns; -0.05ns; -0.03ns	0.38***; 0.32***; 0.32***	-0.13*; 0.05ns; 0.12ns	0.37***; 0.21***; 0.25***	0.07ns; 0.2**; 0.15*	0.07ns; 0.25***; 0.22***	0.12*; 0.14*; 0.24***	-0.14*; -0.04ns; -0.08ns	0.05ns; 0.09ns; 0.13*	0.04ns; 0.18**; 0.21***	-0.05ns; -0.2**; -0.29***	0.09ns; 0.02ns; 0.1ns	0.14*; 0.02ns; 0.04ns	-0.11*; 0.04ns; 0ns	0.14*; 0.21***; 0.28***	0.19***; 0.11ns; 0.12*	0.06ns; 0.02ns; -0.16*	0.14*; 0.12*; 0.11ns	0.22***; 0ns; 0.22***	-0.13*; -0.19**; -0.12ns	0.12*; 0.21***; 0.17**	0.17**; 0.02ns; 0.01ns	0.09ns; -0.06ns; -0.01ns	0.31***; 0.18**; 0.19**	-0.14**; -0.2**; -0.08ns	0.17**; -0.04ns; -0.11ns	0.19***; 0.1ns; 0.19**	-0.2***; -0.18**; -0.25***
PA.Drymass_cm2.g.1	0.27***; -0.01ns; -0.05ns	0ns; -0.12ns; -0.1ns	-0.06ns; -0.01ns; 0ns	-0.05ns; -0.06ns; -0.03ns	-0.18***; -0.02ns; 0.01ns	0.21***; 0.16*; -0.03ns	0.2***; 0.08ns; 0.56***	0.03ns; 0.05ns; -0.35***	0.13*; 0ns; -0.25***	-0.19***; 0.06ns; -0.05ns	-0.18***; -0.16**; -0.43***	0.22***; 0.15*; 0.45***	0.15**; -0.07ns; -0.15*	0.11*; 0.02ns; 0.14*	0.13*; 0.05ns; 0.2**	0.9***; 0.97***; 0.84***	1***; 1***; 1***	0.09ns; -0.03ns; -0.56***	-0.27***; -0.11ns; -0.32***	0.04ns; 0.08ns; 0.29**	0.14*; -0.04ns; -0.09ns	-0.11ns; -0.1ns; -0.23***	0.09ns; 0.21***; -0.11ns	0.07ns; 0.12ns; 0.45***	0.11*; -0.11ns; -0.15*	0.09ns; 0.31***; 0.25***	0.18**; 0.31***; 0.42***	0.13*; 0.16*; 0.29***	0.06ns; 0.19**; 0.22***	0.06ns; 0.08ns; 0.19**	0.05ns; 0.08ns; 0.23***	0.04ns; -0.11ns; -0.12*	-0.04ns; -0.04ns; -0.08ns	0.11*; 0.01ns; 0.06ns	0.03ns; 0.21***; 0.26***	0.15**; 0.14*; 0.32***	0.09ns; 0.04ns; 0ns	0.08ns; 0.08ns; -0.1ns	0.11*; 0.07ns; 0.1ns	0.12*; 0.01ns; 0.1ns	0.02ns; -0.06ns; 0.12ns	0.07ns; 0.19**; 0.15*	0.03ns; 0.1ns; 0.1ns	-0.04ns; 0.01ns; 0.06ns	0.14*; 0.07ns; -0.04ns	-0.06ns; -0.09ns; 0.08ns	-0.06ns; -0.12ns; -0.46***	-0.04ns; 0.03ns; -0.06ns	-0.02ns; -0.1ns; 0.02ns
PMA_g.cm.2	0.26***; 0.16*; -0.03ns	0.1ns; -0.08ns; -0.01ns	-0.02ns; -0.05ns; -0.03ns	-0.01ns; -0.08ns; -0.04ns	-0.03ns; -0.04ns; 0.05ns	0.42***; 0.04ns; 0.11ns	-0.54***; -0.13*; -0.57***	0.55***; 0.1ns; 0.31***	0.57***; 0.03ns; 0.27***	-0.02ns; -0.03ns; 0.01ns	0.41***; 0.06ns; 0.32***	-0.39***; -0.08ns; -0.34***	0.39***; 0.06ns; 0.11ns	-0.03ns; 0ns; 0ns	0.05ns; -0.03ns; -0.16*	0.23***; -0.04ns; -0.42***	0.09ns; -0.03ns; -0.56***	1***; 1***; 1***	0.27***; -0.01ns; 0.3***	0.05ns; 0.24*; 0.04ns	0.31***; 0.18**; 0.16*	0.25***; 0.05ns; 0.19**	0.44***; 0.01ns; 0.31***	-0.35***; -0.12ns; -0.19**	0.46***; 0.1ns; 0.33***	-0.06ns; 0.05ns; 0.04ns	-0.2***; -0.05ns; -0.2**	-0.12*; -0.09ns; -0.16*	-0.35***; -0.13ns; -0.4***	0.04ns; 0.11ns; 0.09ns	-0.06ns; -0.1ns; -0.15*	0.07ns; 0.03ns; -0.01ns	0.18***; -0.03ns; 0.06ns	0.2***; -0.02ns; 0.07ns	-0.17**; -0.07ns; -0.16*	-0.1ns; -0.04ns; -0.12ns	0.34***; 0ns; 0.3***	0.28***; -0.01ns; 0.1ns	0.18**; 0.01ns; 0.06ns	0.21***; 0.01ns; 0.12ns	-0.22***; -0.11ns; -0.21**	0.05ns; 0ns; 0.07ns	0.19***; 0.03ns; -0.1ns	0.16**; -0.08ns; -0.13ns	0.27***; 0.12ns; 0.22***	-0.22***; -0.17**; -0.21**	0.36***; 0.22***; 0.22***	0.35***; 0.14*; 0.37***	-0.31***; -0.01ns; -0.24***
WD_g.cm.3	-0.23***; -0.2***; -0.19**	0.09ns; 0.13*; 0.13*	0.21***; 0.2***; 0.11ns	0.24***; 0.26***; 0.16**	0.21***; 0.09ns; 0.13*	0.01ns; -0.01ns; -0.04ns	-0.12*; 0.2***; -0.16**	0.25***; 0.17**; 0.26***	0.13*; 0.03ns; 0.09ns	0.3***; 0.26***; 0.22***	0.45***; 0.46***; 0.49***	-0.44***; -0.45***; -0.48***	0ns; -0.03ns; -0.02ns	-0.21***; -0.15**; -0.2***	0.03ns; -0.04ns; -0.07ns	-0.13*; -0.08ns; -0.14*	-0.27***; -0.11ns; -0.32***	0.27***; -0.01ns; 0.3***	1***; 1***; 1***	-0.15**; -0.05ns; -0.15ns	0.1ns; 0.03ns; 0.05ns	0.05ns; 0.04ns; 0.07ns	0.2***; 0.2***; 0.2***	-0.16**; -0.19***; -0.19***	0.12*; 0.16**; 0.13*	-0.11ns; -0.11ns; -0.16**	-0.14*; -0.18**; -0.21***	0.07ns; 0.07ns; 0.01ns	-0.07ns; -0.18**; -0.15**	0.01ns; -0.02ns; -0.06ns	0.07ns; 0.05ns; 0.04ns	-0.02ns; -0.03ns; 0.02ns	0.04ns; 0.18**; 0.07ns	0ns; -0.03ns; -0.02ns	-0.03ns; -0.07ns; -0.1ns	-0.03ns; -0.03ns; -0.12*	0.06ns; 0.04ns; 0.07ns	-0.08ns; -0.03ns; -0.05ns	0.06ns; 0.17**; 0.08ns	-0.04ns; 0.01ns; -0.04ns	-0.2***; -0.19***; -0.21***	0.02ns; -0.04ns; -0.05ns	-0.02ns; 0.22**; 0.01ns	-0.01ns; -0.05ns; -0.01ns	0.01ns; -0.05ns; -0.02ns	0.05ns; 0.03ns; 0.01ns	0.16**; 0.09ns; 0.19***	0.11ns; -0.03ns; 0.05ns	-0.14*; -0.11ns; -0.04ns
HuberValue_unitless	0.13*; 0.14ns; 0.18ns	-0.04ns; 0.16ns; 0.13ns	-0.1ns; -0.12ns; -0.15ns	-0.11*; -0.07ns; -0.1ns	-0.09ns; 0.13ns; 0.08ns	-0.05ns; 0.18ns; 0.14ns	0.02ns; -0.18ns; -0.01ns	-0.1ns; 0.09ns; 0.02ns	-0.12*; 0.29**; 0.26**	0.05ns; -0.51***; -0.42***	-0.07ns; 0.04ns; -0.1ns	0.04ns; 0.07ns; 0.07ns	-0.08ns; 0.1ns; 0.07ns	-0.1ns; 0.35***; 0.33***	-0.03ns; -0.11ns; 0.04ns	0ns; 0.07ns; 0.22*	0.04ns; 0.08ns; 0.29**	0.05ns; 0.24*; 0.04ns	-0.15**; -0.05ns; -0.15ns	1***; 1***; 1***	0.22***; 0.17ns; 0.2*	0.02ns; -0.06ns; -0.09ns	-0.08ns; 0.04ns; 0.01ns	0.06ns; -0.06ns; -0.03ns	0.07ns; 0.11ns; 0.11ns	0.2***; 0.12ns; 0.11ns	0.09ns; 0.1ns; 0.23*	-0.02ns; 0.09ns; 0.2*	-0.1ns; 0.11ns; 0.08ns	0.03ns; 0.19*; 0.28**	0.13*; -0.15ns; -0.03ns	0.04ns; -0.08ns; -0.06ns	0.02ns; -0.1ns; -0.15ns	0.07ns; 0.07ns; 0.2*	0.11*; -0.2*; -0.29**	0.04ns; 0.19*; 0.13ns	0.29***; -0.01ns; 0.3**	0.06ns; 0.33***; 0.1ns	0.06ns; 0.04ns; 0.14ns	0.14*; 0.02ns; 0.19*	0.07ns; -0.23*; -0.35***	0.13*; 0.36***; 0.31***	0.18**; 0.07ns; -0.02ns	0.28***; -0.11ns; -0.16ns	-0.17**; 0.22*; 0.25**	-0.21***; -0.22*; -0.18ns	-0.05ns; 0.12ns; 0.01ns	-0.01ns; 0.16ns; 0.16ns	0.25***; -0.46***; -0.41***
BarkThicknessStemDiameterRatio	0.09ns; 0.34***; 0.16**	0.02ns; -0.04ns; -0.03ns	0.06ns; -0.01ns; 0.03ns	0.07ns; -0.01ns; 0.01ns	-0.03ns; 0.02ns; -0.09ns	0.05ns; 0.17**; 0.08ns	-0.02ns; -0.09ns; -0.14*	0.26***; 0.41***; 0.3***	0.26***; 0.31***; 0.34***	-0.01ns; -0.05ns; -0.06ns	0.19***; 0.19**; 0.16**	-0.21***; -0.14*; -0.18**	0.2***; 0.33***; 0.24***	-0.08ns; -0.03ns; -0.06ns	-0.03ns; -0.12ns; -0.17*	0.24***; -0.02ns; -0.03ns	0.14*; -0.04ns; -0.09ns	0.31***; 0.18**; 0.16*	0.1ns; 0.03ns; 0.05ns	0.22***; 0.17ns; 0.2*	1***; 1***; 1***	0.16**; 0.16**; 0.13*	0.21***; 0.22***; 0.21***	-0.19***; -0.24***; -0.24***	0.3***; 0.35***; 0.29***	0.08ns; 0.03ns; 0.01ns	-0.06ns; -0.11ns; -0.15*	0.03ns; -0.1ns; -0.16**	-0.28***; -0.22***; -0.28***	-0.02ns; -0.06ns; -0.11ns	-0.11ns; -0.07ns; -0.15*	-0.08ns; -0.1ns; -0.04ns	0.12*; 0.09ns; 0ns	0ns; -0.06ns; -0.04ns	-0.08ns; -0.13*; -0.17**	-0.03ns; 0.03ns; -0.03ns	0.26***; 0.02ns; 0.14*	-0.01ns; 0.02ns; 0.05ns	0.12*; 0.04ns; 0.01ns	0.12*; 0.08ns; 0.08ns	-0.28***; -0.15*; -0.14*	0.13*; -0.04ns; -0.1ns	0.37***; 0.01ns; 0.15*	0.27***; -0.16*; -0.2**	0ns; 0.16*; 0.08ns	-0.23***; -0.26***; -0.22***	0.24***; 0.32***; 0.24***	0.21***; 0.14*; 0.09ns	-0.05ns; -0.18**; -0.12ns
Cmass_mg.g.1	0.06ns; 0.07ns; 0.01ns	0.11*; 0.1ns; 0.09ns	0.09ns; 0.03ns; 0.05ns	0.14*; 0.09ns; 0.08ns	-0.03ns; 0.04ns; -0.11ns	0.09ns; -0.02ns; -0.03ns	-0.3***; -0.23***; -0.29***	0.43***; 0.38***; 0.37***	0.31***; -0.1ns; 0.16**	0.22***; 0.28***; 0.31***	0.39***; 0.4***; 0.4***	-0.34***; -0.4***; -0.38***	0.29***; 0.14*; 0.18***	-0.3***; -0.22***; -0.31***	-0.13*; -0.09ns; -0.14*	0.06ns; -0.05ns; -0.03ns	-0.11ns; -0.1ns; -0.23***	0.25***; 0.05ns; 0.19**	0.05ns; 0.04ns; 0.07ns	0.02ns; -0.06ns; -0.09ns	0.16**; 0.16**; 0.13*	1***; 1***; 1***	0.36***; 0.21***; 0.27***	-0.23***; -0.25***; -0.29***	0.28***; 0.25***; 0.25***	-0.16**; -0.09ns; -0.14*	-0.36***; -0.38***; -0.4***	-0.39***; -0.53***; -0.51***	-0.44***; -0.46***; -0.51***	-0.08ns; -0.09ns; -0.11ns	-0.14**; -0.13*; -0.17**	0.14*; 0.05ns; 0.15**	0.06ns; -0.15*; -0.03ns	0.1ns; 0.04ns; 0.09ns	-0.19***; -0.18**; -0.17**	-0.26***; -0.13*; -0.3***	0.11*; -0.1ns; 0.06ns	0.03ns; -0.18**; -0.1ns	-0.15**; -0.18**; -0.22***	0.18***; -0.05ns; 0.13*	0.04ns; 0.03ns; 0.03ns	-0.22***; -0.29***; -0.29***	0.13*; -0.18*; -0.38***	0.23***; -0.11ns; 0.01ns	0.2***; 0.13*; 0.12*	-0.04ns; -0.04ns; -0.08ns	0.53***; 0.44***; 0.44***	0.23***; 0.1ns; 0.15*	-0.03ns; -0.04ns; -0.02ns
Narea_g.m.2	0.14*; 0.15*; 0.07ns	0.3***; 0.22***; 0.21***	0.12*; -0.02ns; 0.06ns	0.23***; 0.05ns; 0.15*	0.19***; 0.15**; 0.11ns	0.52***; 0.6***; 0.55***	-0.45***; -0.18**; -0.49***	0.81***; 0.7***; 0.81***	0.73***; 0.3***; 0.68***	0.22***; 0.24***; 0.18**	0.29***; 0.21***; 0.24***	-0.2***; -0.13*; -0.23***	0.78***; 0.71***; 0.76***	0ns; -0.07ns; -0.11ns	0.15**; -0.13*; -0.17**	0.38***; 0.32***; 0.32***	0.09ns; 0.21***; -0.11ns	0.44***; 0.01ns; 0.31***	0.2***; 0.2***; 0.2***	-0.08ns; 0.04ns; 0.01ns	0.21***; 0.22***; 0.21***	0.36***; 0.21***; 0.27***	1***; 1***; 1***	-0.04ns; -0.03ns; -0.1ns	0.81***; 0.7***; 0.79***	0.21***; 0.08ns; 0.09ns	0.03ns; 0.08ns; -0.06ns	0.08ns; -0.07ns; -0.1ns	-0.41***; -0.44***; -0.59***	0.23***; 0.09ns; 0.14*	0.13*; 0.2***; 0.06ns	-0.11*; -0.26***; -0.29***	0.42***; 0.14*; 0.34***	0.28***; 0.02ns; 0.13*	-0.12*; -0.19***; -0.25***	0.17**; 0.17**; 0.09ns	0.46***; 0.12*; 0.38***	0.11ns; -0.11*; -0.07ns	0.2***; 0.09ns; 0.09ns	0.47***; 0.06ns; 0.37***	-0.16**; -0.28***; -0.32***	0.2***; 0.06ns; 0.04ns	0.4***; -0.07ns; -0.14ns	0.37***; -0.22**; -0.21**	0.52***; 0.38***; 0.38***	-0.11*; -0.25***; -0.22***	0.23***; 0.12*; 0.14*	0.55***; 0.28***; 0.47***	-0.53***; -0.61***; -0.62***
Nmass_mg.g.1	-0.15**; -0.24***; -0.27***	-0.08ns; -0.16**; -0.13*	0.08ns; 0.07ns; 0.15**	0.04ns; 0.04ns; 0.12*	0.28***; 0.1ns; 0.4***	-0.1ns; -0.09ns; -0.15**	0.35***; 0.06ns; 0.38***	-0.57***; -0.6***; -0.67***	-0.45***; -0.27***; -0.53***	-0.19***; -0.25***; -0.11*	-0.51***; -0.56***; -0.53***	0.55***; 0.56***; 0.55***	-0.34***; -0.32***; -0.42***	0.36***; 0.23***; 0.34***	0.28***; 0.28***; 0.33***	-0.13*; 0.05ns; 0.12ns	0.07ns; 0.12ns; 0.45***	-0.35***; -0.12ns; -0.19**	-0.16**; -0.19***; -0.19***	0.06ns; -0.06ns; -0.03ns	-0.19***; -0.24***; -0.24***	-0.23***; -0.25***; -0.29***	-0.04ns; -0.03ns; -0.1ns	1***; 1***; 1***	-0.12*; -0.19***; -0.26***	0.51***; 0.52***; 0.51***	0.64***; 0.56***; 0.62***	0.33***; 0.16**; 0.28***	0.35***; 0.17**; 0.28***	0.5***; 0.19***; 0.39***	0.38***; 0.2***; 0.33***	0.1ns; -0.03ns; -0.06ns	0.09ns; -0.02ns; -0.03ns	0.26***; 0.18**; 0.19***	0.61***; 0.5***; 0.62***	0.44***; 0.17**; 0.4***	0.14**; 0.17**; 0.08ns	0ns; -0.01ns; -0.12*	0.21***; 0.11ns; 0.15**	0.14*; 0.09ns; 0.09ns	0.39***; 0.24***; 0.33***	0.2***; 0.07ns; 0.13*	0.06ns; 0.02ns; 0.13ns	0.05ns; 0.08ns; 0.18*	-0.17**; -0.25***; -0.29***	0.34***; 0.22***; 0.27***	-0.82***; -0.85***; -0.98***	-0.18***; -0.01ns; -0.13*	0.2***; 0.08ns; 0.12*
Parea_g.m.2	0.3***; 0.23***; 0.22***	0.3***; 0.21***; 0.2***	-0.02ns; -0.18**; -0.14*	0.06ns; -0.13*; -0.07ns	0.13*; 0.02ns; -0.03ns	0.59***; 0.5***; 0.53***	-0.56***; -0.22***; -0.6***	0.72***; 0.65***; 0.73***	0.73***; 0.3***; 0.68***	0.06ns; 0.17**; 0.12*	0.14**; 0.16**; 0.14*	-0.06ns; -0.09ns; -0.14*	0.78***; 0.67***; 0.76***	0.08ns; -0.06ns; -0.07ns	0.19***; -0.06ns; -0.12*	0.37***; 0.21***; 0.25***	0.11*; -0.11ns; -0.15*	0.46***; 0.1ns; 0.33***	0.12*; 0.16**; 0.13*	0.07ns; 0.11ns; 0.11ns	0.3***; 0.35***; 0.29***	0.28***; 0.25***; 0.25***	0.81***; 0.7***; 0.79***	-0.12*; -0.19***; -0.26***	1***; 1***; 1***	0.55***; 0.48***; 0.49***	0.25***; 0.23***; 0.16**	0.16**; -0.04ns; -0.04ns	-0.45***; -0.45***; -0.68***	0.34***; 0.15*; 0.26***	0.19***; 0.21***; 0.1ns	-0.21***; -0.28***; -0.43***	0.58***; 0.11ns; 0.44***	0.32***; 0.05ns; 0.15**	-0.04ns; -0.02ns; -0.18**	0.29***; 0.29***; 0.2***	0.61***; 0.08ns; 0.53***	0.19***; -0.1ns; -0.01ns	0.35***; 0.13*; 0.2***	0.57***; 0.2***; 0.48***	-0.18***; -0.28***; -0.38***	0.35***; 0.13*; 0.2***	0.58***; -0.08ns; -0.07ns	0.52***; -0.23**; -0.27***	0.39***; 0.2***; 0.23***	-0.51***; -0.69***; -0.77***	0.28***; 0.31***; 0.29***	0.68***; 0.49***; 0.66***	-0.48***; -0.48***; -0.54***
Pmass_mg.g.1	0.16**; -0.02ns; 0.03ns	0.1ns; -0.05ns; -0.04ns	-0.08ns; -0.17**; -0.13*	-0.09ns; -0.19**; -0.15*	0.23***; 0ns; 0.17**	0.25***; 0.12*; 0.14*	-0.11ns; -0.11*; -0.12*	-0.11*; -0.2***; -0.24***	0.01ns; -0.01ns; -0.08ns	-0.16**; -0.21***; -0.08ns	-0.41***; -0.41***; -0.46***	0.47***; 0.44***; 0.47***	0.13*; 0.02ns; 0.02ns	0.35***; 0.13*; 0.27***	0.35***; 0.29***; 0.24***	0.07ns; 0.2**; 0.15*	0.09ns; 0.31***; 0.25***	-0.06ns; 0.05ns; 0.04ns	-0.11ns; -0.11ns; -0.16**	0.2***; 0.12ns; 0.11ns	0.08ns; 0.03ns; 0.01ns	-0.16**; -0.09ns; -0.14*	0.21***; 0.08ns; 0.09ns	0.51***; 0.52***; 0.51***	0.55***; 0.48***; 0.49***	1***; 1***; 1***	0.81***; 0.64***; 0.76***	0.43***; 0.08ns; 0.25***	-0.01ns; -0.15**; -0.21***	0.63***; 0.3***; 0.53***	0.43***; 0.21***; 0.33***	-0.2***; -0.19***; -0.38***	0.51***; 0.04ns; 0.28***	0.35***; 0.16**; 0.23***	0.47***; 0.51***; 0.45***	0.6***; 0.32***; 0.52***	0.53***; 0.14*; 0.46***	0.12*; -0.08ns; -0.05ns	0.44***; 0.13*; 0.31***	0.48***; 0.24***; 0.41***	0.11ns; 0.06ns; 0.01ns	0.48***; 0.22***; 0.35***	0.48***; -0.04ns; 0.17*	0.42***; -0.06ns; 0.02ns	-0.1ns; -0.21***; -0.26***	-0.41***; -0.59***; -0.68***	-0.38***; -0.35***; -0.5***	0.3***; 0.44***; 0.38***	-0.1ns; -0.07ns; -0.1ns
Kmass_mg.g.1	0.12*; 0.01ns; 0ns	0.1ns; 0.08ns; 0.04ns	-0.07ns; -0.16**; -0.1ns	-0.06ns; -0.14*; -0.08ns	0.24***; 0.01ns; 0.23***	0.19***; 0.26***; 0.13*	0.1ns; 0ns; 0.11ns	-0.32***; -0.31***; -0.42***	-0.13*; 0.08ns; -0.2***	-0.29***; -0.31***; -0.2***	-0.55***; -0.6***; -0.61***	0.61***; 0.66***; 0.62***	-0.02ns; 0.07ns; -0.09ns	0.47***; 0.28***; 0.43***	0.45***; 0.32***; 0.37***	0.07ns; 0.25***; 0.22***	0.18**; 0.31***; 0.42***	-0.2***; -0.05ns; -0.2**	-0.14*; -0.18**; -0.21***	0.09ns; 0.1ns; 0.23*	-0.06ns; -0.11ns; -0.15*	-0.36***; -0.38***; -0.4***	0.03ns; 0.08ns; -0.06ns	0.64***; 0.56***; 0.62***	0.25***; 0.23***; 0.16**	0.81***; 0.64***; 0.76***	1***; 1***; 1***	0.57***; 0.29***; 0.47***	0.27***; 0.08ns; 0.11ns	0.61***; 0.36***; 0.53***	0.52***; 0.38***; 0.45***	-0.13*; -0.11ns; -0.32***	0.37***; 0.11*; 0.21***	0.34***; 0.12*; 0.22***	0.55***; 0.41***; 0.47***	0.67***; 0.45***; 0.61***	0.41***; 0.14*; 0.33***	0.13*; -0.04ns; -0.03ns	0.41***; 0.2***; 0.3***	0.36***; 0.19***; 0.3***	0.22***; 0.04ns; 0.09ns	0.48***; 0.26***; 0.39***	0.29***; 0.07ns; 0.25***	0.22***; 0.01ns; 0.1ns	-0.17**; -0.16**; -0.25***	-0.12*; -0.33***; -0.31***	-0.53***; -0.51***; -0.65***	0.1ns; 0.24***; 0.14*	0.01ns; -0.07ns; -0.04ns
Camass_mg.g.1	0.07ns; -0.09ns; -0.12*	0.13*; -0.04ns; 0.06ns	-0.08ns; 0ns; -0.1ns	-0.06ns; -0.06ns; -0.08ns	0.23***; 0.01ns; 0.21***	0.1ns; -0.06ns; -0.11ns	0.15**; 0.17**; 0.21***	-0.11ns; -0.18**; -0.24***	-0.01ns; 0.04ns; -0.13*	-0.12*; -0.16**; -0.19***	-0.2***; -0.18**; -0.21***	0.26***; 0.21***; 0.21***	0.01ns; -0.09ns; -0.14*	0.35***; 0.25***; 0.34***	0.41***; 0.08ns; 0.23***	0.12*; 0.14*; 0.24***	0.13*; 0.16*; 0.29***	-0.12*; -0.09ns; -0.16*	0.07ns; 0.07ns; 0.01ns	-0.02ns; 0.09ns; 0.2*	0.03ns; -0.1ns; -0.16**	-0.39***; -0.53***; -0.51***	0.08ns; -0.07ns; -0.1ns	0.33***; 0.16**; 0.28***	0.16**; -0.04ns; -0.04ns	0.43***; 0.08ns; 0.25***	0.57***; 0.29***; 0.47***	1***; 1***; 1***	0.31***; 0.43***; 0.26***	0.43***; 0.08ns; 0.28***	0.41***; 0.11*; 0.28***	-0.19***; -0.18**; -0.38***	0.21***; 0.01ns; 0.01ns	0.14*; -0.06ns; -0.03ns	0.24***; 0.09ns; 0.13*	0.62***; 0.17**; 0.49***	0.34***; 0.02ns; 0.18**	0.15**; 0.11ns; 0.04ns	0.51***; 0.15**; 0.37***	0.21***; 0ns; 0.04ns	-0.17**; -0.29***; -0.36***	0.74***; 0.48***; 0.68***	0.29***; 0.06ns; 0.28***	0.19***; 0.02ns; 0.01ns	0.04ns; -0.07ns; -0.09ns	0.07ns; -0.01ns; -0.05ns	-0.26***; -0.24***; -0.35***	0.19***; 0.03ns; 0.08ns	-0.04ns; -0.08ns; -0.08ns
Mgmass_mg.g.1	-0.12*; -0.12*; -0.12*	-0.08ns; -0.1ns; -0.1ns	-0.02ns; 0.09ns; 0.08ns	-0.06ns; 0.05ns; 0.05ns	-0.08ns; -0.09ns; -0.05ns	-0.26***; -0.24***; -0.34***	0.49***; 0.22***; 0.56***	-0.49***; -0.41***; -0.6***	-0.43***; -0.13*; -0.51***	-0.11*; -0.13*; -0.16**	-0.26***; -0.28***; -0.29***	0.3***; 0.27***; 0.28***	-0.42***; -0.35***; -0.52***	0.07ns; 0.13*; 0.12*	0.08ns; 0.02ns; 0.12ns	-0.14*; -0.04ns; -0.08ns	0.06ns; 0.19**; 0.22***	-0.35***; -0.13ns; -0.4***	-0.07ns; -0.18**; -0.15**	-0.1ns; 0.11ns; 0.08ns	-0.28***; -0.22***; -0.28***	-0.44***; -0.46***; -0.51***	-0.41***; -0.44***; -0.59***	0.35***; 0.17**; 0.28***	-0.45***; -0.45***; -0.68***	-0.01ns; -0.15**; -0.21***	0.27***; 0.08ns; 0.11ns	0.31***; 0.43***; 0.26***	1***; 1***; 1***	-0.05ns; -0.15**; -0.24***	0.21***; 0.02ns; 0.03ns	0.4***; 0.21***; 0.29***	-0.21***; -0.06ns; -0.32***	0.08ns; 0.1ns; -0.01ns	0.41***; 0.14*; 0.26***	0.15**; -0.04ns; 0ns	-0.27***; 0ns; -0.45***	0.1ns; 0.27***; 0.04ns	0.04ns; 0.05ns; -0.09ns	-0.22***; -0.06ns; -0.39***	0.41***; 0.14*; 0.3***	0.03ns; 0.02ns; -0.1ns	-0.5***; 0.09ns; 0.22**	-0.48***; 0.34***; 0.33***	-0.21***; -0.18**; -0.18**	0.56***; 0.32***; 0.48***	-0.29***; -0.28***; -0.35***	-0.48***; -0.45***; -0.69***	0.39***; 0.28***; 0.34***
Femass_mg.g.1	0.09ns; 0.06ns; 0.01ns	0.07ns; 0.04ns; 0ns	0ns; -0.1ns; -0.08ns	-0.02ns; -0.08ns; -0.08ns	0.42***; 0.13*; 0.38***	0.31***; 0.18**; 0.24***	-0.2***; -0.13*; -0.24***	-0.1ns; -0.09ns; -0.13*	0.06ns; 0.03ns; 0.02ns	-0.21***; -0.09ns; -0.18**	-0.26***; -0.15**; -0.27***	0.32***; 0.17**; 0.28***	0.07ns; 0.03ns; 0.02ns	0.42***; 0.12*; 0.34***	0.32***; 0.23***; 0.25***	0.05ns; 0.09ns; 0.13*	0.06ns; 0.08ns; 0.19**	0.04ns; 0.11ns; 0.09ns	0.01ns; -0.02ns; -0.06ns	0.03ns; 0.19*; 0.28**	-0.02ns; -0.06ns; -0.11ns	-0.08ns; -0.09ns; -0.11ns	0.23***; 0.09ns; 0.14*	0.5***; 0.19***; 0.39***	0.34***; 0.15*; 0.26***	0.63***; 0.3***; 0.53***	0.61***; 0.36***; 0.53***	0.43***; 0.08ns; 0.28***	-0.05ns; -0.15**; -0.24***	1***; 1***; 1***	0.45***; 0.15**; 0.35***	-0.12*; -0.15*; -0.31***	0.52***; 0.17**; 0.46***	0.36***; 0.07ns; 0.22***	0.32***; 0.17**; 0.2***	0.62***; 0.17**; 0.51***	0.58***; 0.17**; 0.52***	0.26***; -0.01ns; 0.16**	0.61***; 0.42***; 0.56***	0.51***; 0.18**; 0.46***	0.01ns; -0.11*; -0.16**	0.52***; 0.19***; 0.41***	0.48***; 0ns; 0.12ns	0.43***; -0.06ns; -0.03ns	0.02ns; -0.09ns; -0.11ns	-0.04ns; -0.22***; -0.26***	-0.35***; -0.16**; -0.38***	0.36***; 0.48***; 0.46***	-0.2***; -0.07ns; -0.16**
Bmass_mg.g.1	0.12*; -0.02ns; -0.01ns	0.11*; 0.16**; 0.11ns	-0.02ns; -0.05ns; -0.01ns	0.05ns; 0ns; 0.05ns	0.19***; 0.03ns; 0.2***	0.15**; 0.14*; 0.11ns	0.01ns; -0.05ns; 0.03ns	-0.1ns; -0.04ns; -0.15**	-0.09ns; 0.03ns; -0.14*	0ns; 0.09ns; 0.14*	-0.25***; -0.22***; -0.26***	0.31***; 0.25***; 0.28***	0.03ns; 0.15**; 0ns	0.17**; 0ns; 0.08ns	0.43***; 0.18**; 0.28***	0.04ns; 0.18**; 0.21***	0.05ns; 0.08ns; 0.23***	-0.06ns; -0.1ns; -0.15*	0.07ns; 0.05ns; 0.04ns	0.13*; -0.15ns; -0.03ns	-0.11ns; -0.07ns; -0.15*	-0.14**; -0.13*; -0.17**	0.13*; 0.2***; 0.06ns	0.38***; 0.2***; 0.33***	0.19***; 0.21***; 0.1ns	0.43***; 0.21***; 0.33***	0.52***; 0.38***; 0.45***	0.41***; 0.11*; 0.28***	0.21***; 0.02ns; 0.03ns	0.45***; 0.15**; 0.35***	1***; 1***; 1***	0.02ns; -0.09ns; -0.16**	0.4***; 0.26***; 0.32***	0.36***; 0.13*; 0.26***	0.37***; 0.1ns; 0.24***	0.52***; 0.29***; 0.45***	0.42***; 0.2***; 0.34***	0.23***; 0.05ns; 0.08ns	0.38***; 0.26***; 0.28***	0.45***; 0.13*; 0.39***	0.12*; -0.11ns; -0.03ns	0.28***; 0.08ns; 0.17**	0.25***; -0.02ns; 0.1ns	0.32***; 0.26***; 0.37***	-0.08ns; -0.08ns; -0.15*	0.09ns; -0.12*; -0.09ns	-0.26***; -0.22***; -0.34***	0.16**; 0.17**; 0.16**	0.06ns; -0.03ns; 0.01ns
Mnmass_mg.g.1	-0.03ns; 0.01ns; 0.03ns	-0.15**; -0.06ns; -0.16**	0.08ns; 0.06ns; 0.19**	0.04ns; 0.05ns; 0.14*	-0.18**; -0.07ns; -0.19***	-0.14**; -0.15*; -0.19***	0.12*; 0.05ns; 0.15**	-0.1ns; -0.13*; -0.18**	-0.15**; -0.1ns; -0.24***	0.03ns; 0.01ns; 0.14*	0.13*; 0.01ns; 0.15**	-0.09ns; -0.01ns; -0.16**	-0.2***; -0.19***; -0.31***	-0.27***; -0.12*; -0.27***	-0.1ns; -0.04ns; -0.14*	-0.05ns; -0.2**; -0.29***	0.04ns; -0.11ns; -0.12*	0.07ns; 0.03ns; -0.01ns	-0.02ns; -0.03ns; 0.02ns	0.04ns; -0.08ns; -0.06ns	-0.08ns; -0.1ns; -0.04ns	0.14*; 0.05ns; 0.15**	-0.11*; -0.26***; -0.29***	0.1ns; -0.03ns; -0.06ns	-0.21***; -0.28***; -0.43***	-0.2***; -0.19***; -0.38***	-0.13*; -0.11ns; -0.32***	-0.19***; -0.18**; -0.38***	0.4***; 0.21***; 0.29***	-0.12*; -0.15*; -0.31***	0.02ns; -0.09ns; -0.16**	1***; 1***; 1***	-0.21***; -0.09ns; -0.38***	0.3***; 0.17**; 0.19***	0.17**; -0.02ns; 0ns	-0.28***; -0.19***; -0.52***	-0.01ns; -0.05ns; -0.2***	0.27***; 0.08ns; 0.19***	-0.07ns; -0.05ns; -0.19***	0.03ns; -0.05ns; -0.15*	0.49***; 0.31***; 0.4***	-0.15**; -0.19***; -0.34***	-0.32***; 0.11ns; -0.1ns	-0.18***; 0.15*; 0.32***	-0.07ns; -0.12*; -0.1ns	0.48***; 0.22***; 0.37***	0.06ns; 0.02ns; 0.08ns	-0.26***; -0.3***; -0.46***	0.3***; 0.27***; 0.32***
Namass_mg.g.1	0.18**; 0.03ns; 0.06ns	0.21***; 0.18**; 0.16**	-0.04ns; -0.05ns; -0.1ns	0.01ns; 0.01ns; -0.04ns	0.22***; -0.02ns; 0.1ns	0.42***; 0.29***; 0.43***	-0.45***; -0.04ns; -0.43***	0.3***; 0.06ns; 0.27***	0.36***; 0.3***; 0.33***	-0.01ns; -0.06ns; 0ns	-0.14**; -0.13*; -0.18**	0.22***; 0.18**; 0.19***	0.45***; 0.23***; 0.44***	0.18**; -0.01ns; 0.05ns	0.24***; 0.1ns; 0.12*	0.09ns; 0.02ns; 0.1ns	-0.04ns; -0.04ns; -0.08ns	0.18***; -0.03ns; 0.06ns	0.04ns; 0.18**; 0.07ns	0.02ns; -0.1ns; -0.15ns	0.12*; 0.09ns; 0ns	0.06ns; -0.15*; -0.03ns	0.42***; 0.14*; 0.34***	0.09ns; -0.02ns; -0.03ns	0.58***; 0.11ns; 0.44***	0.51***; 0.04ns; 0.28***	0.37***; 0.11*; 0.21***	0.21***; 0.01ns; 0.01ns	-0.21***; -0.06ns; -0.32***	0.52***; 0.17**; 0.46***	0.4***; 0.26***; 0.32***	-0.21***; -0.09ns; -0.38***	1***; 1***; 1***	0.36***; 0.05ns; 0.17**	0.13*; -0.12*; -0.11ns	0.41***; 0.07ns; 0.31***	0.52***; 0.08ns; 0.4***	0.31***; -0.02ns; 0.09ns	0.49***; 0.27***; 0.41***	0.59***; 0.02ns; 0.46***	-0.11ns; -0.13*; -0.32***	0.41***; 0.03ns; 0.2***	0.55***; -0.02ns; 0.03ns	0.53***; 0.06ns; -0.03ns	0.16**; -0.04ns; 0.07ns	-0.23***; -0.08ns; -0.33***	0.06ns; -0.03ns; 0.03ns	0.54***; 0.13*; 0.53***	-0.13*; -0.07ns; -0.18**
Znmass_mg.g.1	0.18**; 0ns; 0.1ns	0.18**; 0.04ns; 0.13*	-0.09ns; -0.07ns; -0.12*	-0.01ns; -0.07ns; -0.06ns	0.04ns; -0.06ns; -0.04ns	0.23***; -0.02ns; 0.11ns	-0.22***; -0.06ns; -0.13*	0.1ns; -0.08ns; -0.02ns	0.16**; -0.06ns; 0ns	-0.09ns; -0.01ns; 0.03ns	-0.1ns; -0.09ns; -0.12*	0.15**; 0.08ns; 0.12*	0.18***; -0.03ns; 0.05ns	0.13*; -0.03ns; 0.08ns	0.22***; 0.04ns; 0.06ns	0.14*; 0.02ns; 0.04ns	0.11*; 0.01ns; 0.06ns	0.2***; -0.02ns; 0.07ns	0ns; -0.03ns; -0.02ns	0.07ns; 0.07ns; 0.2*	0ns; -0.06ns; -0.04ns	0.1ns; 0.04ns; 0.09ns	0.28***; 0.02ns; 0.13*	0.26***; 0.18**; 0.19***	0.32***; 0.05ns; 0.15**	0.35***; 0.16**; 0.23***	0.34***; 0.12*; 0.22***	0.14*; -0.06ns; -0.03ns	0.08ns; 0.1ns; -0.01ns	0.36***; 0.07ns; 0.22***	0.36***; 0.13*; 0.26***	0.3***; 0.17**; 0.19***	0.36***; 0.05ns; 0.17**	1***; 1***; 1***	0.35***; 0.15**; 0.23***	0.24***; 0.02ns; 0.11ns	0.52***; 0.27***; 0.41***	0.34***; 0.05ns; 0.17**	0.34***; 0.14*; 0.22***	0.62***; 0.15**; 0.55***	0.2***; 0.09ns; 0.11ns	0.28***; -0.05ns; 0.1ns	0.19***; 0.03ns; 0.02ns	0.27***; 0.17*; 0.24***	0.07ns; -0.04ns; -0.01ns	0.04ns; 0.01ns; -0.1ns	-0.09ns; -0.12*; -0.16**	0.23***; 0ns; 0.12*	-0.01ns; 0.04ns; 0ns
Cumass_mg.g.1	-0.12*; -0.24***; -0.26***	-0.07ns; -0.1ns; -0.11ns	0.07ns; 0.07ns; 0.17**	0.02ns; 0.04ns; 0.13*	0.18***; -0.04ns; 0.21***	-0.15**; -0.21***; -0.28***	0.28***; 0.16**; 0.35***	-0.43***; -0.45***; -0.55***	-0.41***; -0.27***; -0.56***	-0.02ns; -0.04ns; 0.18**	-0.31***; -0.3***; -0.3***	0.35***; 0.26***; 0.31***	-0.31***; -0.33***; -0.45***	0.08ns; -0.06ns; 0.02ns	0.23***; 0.16**; 0.14*	-0.11*; 0.04ns; 0ns	0.03ns; 0.21***; 0.26***	-0.17**; -0.07ns; -0.16*	-0.03ns; -0.07ns; -0.1ns	0.11*; -0.2*; -0.29**	-0.08ns; -0.13*; -0.17**	-0.19***; -0.18**; -0.17**	-0.12*; -0.19***; -0.25***	0.61***; 0.5***; 0.62***	-0.04ns; -0.02ns; -0.18**	0.47***; 0.51***; 0.45***	0.55***; 0.41***; 0.47***	0.24***; 0.09ns; 0.13*	0.41***; 0.14*; 0.26***	0.32***; 0.17**; 0.2***	0.37***; 0.1ns; 0.24***	0.17**; -0.02ns; 0ns	0.13*; -0.12*; -0.11ns	0.35***; 0.15**; 0.23***	1***; 1***; 1***	0.4***; 0.17**; 0.3***	0.15**; 0.03ns; 0.03ns	0.07ns; 0.04ns; -0.05ns	0.19***; 0.02ns; 0.05ns	0.15**; 0.07ns; 0.05ns	0.51***; 0.26***; 0.44***	0.07ns; -0.13*; -0.09ns	0ns; 0.15*; 0.14ns	0.07ns; 0.16*; 0.4***	-0.32***; -0.33***; -0.37***	0.22***; -0.04ns; 0.03ns	-0.47***; -0.49***; -0.61***	-0.12*; 0.02ns; -0.14*	0.29***; 0.22***; 0.29***
Momass_mg.g.1	0.15**; 0.12*; 0.05ns	0.11*; 0.03ns; 0.02ns	-0.02ns; -0.1ns; -0.1ns	-0.02ns; -0.1ns; -0.09ns	0.29***; 0.1ns; 0.24***	0.21***; 0.18**; 0.1ns	-0.01ns; -0.08ns; -0.03ns	-0.11*; -0.02ns; -0.18**	0.03ns; 0.07ns; -0.03ns	-0.18***; -0.08ns; -0.15**	-0.34***; -0.26***; -0.4***	0.4***; 0.32***; 0.41***	0.1ns; 0.21***; 0.06ns	0.43***; 0.18**; 0.35***	0.44***; 0.12*; 0.3***	0.14*; 0.21***; 0.28***	0.15**; 0.14*; 0.32***	-0.1ns; -0.04ns; -0.12ns	-0.03ns; -0.03ns; -0.12*	0.04ns; 0.19*; 0.13ns	-0.03ns; 0.03ns; -0.03ns	-0.26***; -0.13*; -0.3***	0.17**; 0.17**; 0.09ns	0.44***; 0.17**; 0.4***	0.29***; 0.29***; 0.2***	0.6***; 0.32***; 0.52***	0.67***; 0.45***; 0.61***	0.62***; 0.17**; 0.49***	0.15**; -0.04ns; 0ns	0.62***; 0.17**; 0.51***	0.52***; 0.29***; 0.45***	-0.28***; -0.19***; -0.52***	0.41***; 0.07ns; 0.31***	0.24***; 0.02ns; 0.11ns	0.4***; 0.17**; 0.3***	1***; 1***; 1***	0.42***; 0.07ns; 0.32***	0.15**; -0.05ns; -0.03ns	0.47***; 0.09ns; 0.32***	0.42***; 0.32***; 0.35***	-0.03ns; -0.13*; -0.17**	0.5***; 0.11ns; 0.38***	0.35***; 0.09ns; 0.25***	0.29***; 0.01ns; 0.09ns	0.01ns; 0ns; -0.07ns	-0.02ns; -0.22***; -0.23***	-0.34***; -0.16**; -0.43***	0.25***; 0.25***; 0.25***	-0.15**; -0.14*; -0.18**
Comass_mg.g.1	0.3***; 0.08ns; 0.23***	0.21***; -0.03ns; 0.12*	-0.11*; -0.08ns; -0.21***	-0.06ns; -0.1ns; -0.16**	0.21***; 0ns; 0.13*	0.43***; 0.08ns; 0.34***	-0.38***; -0.04ns; -0.37***	0.28***; -0.02ns; 0.22***	0.37***; 0.02ns; 0.29***	-0.11*; -0.09ns; 0.03ns	-0.04ns; -0.14*; -0.08ns	0.1ns; 0.17**; 0.07ns	0.37***; 0.1ns; 0.31***	0.18***; 0.03ns; 0.08ns	0.34***; 0.07ns; 0.15*	0.19***; 0.11ns; 0.12*	0.09ns; 0.04ns; 0ns	0.34***; 0ns; 0.3***	0.06ns; 0.04ns; 0.07ns	0.29***; -0.01ns; 0.3**	0.26***; 0.02ns; 0.14*	0.11*; -0.1ns; 0.06ns	0.46***; 0.12*; 0.38***	0.14**; 0.17**; 0.08ns	0.61***; 0.08ns; 0.53***	0.53***; 0.14*; 0.46***	0.41***; 0.14*; 0.33***	0.34***; 0.02ns; 0.18**	-0.27***; 0ns; -0.45***	0.58***; 0.17**; 0.52***	0.42***; 0.2***; 0.34***	-0.01ns; -0.05ns; -0.2***	0.52***; 0.08ns; 0.4***	0.52***; 0.27***; 0.41***	0.15**; 0.03ns; 0.03ns	0.42***; 0.07ns; 0.32***	1***; 1***; 1***	0.41***; 0.01ns; 0.32***	0.58***; 0.39***; 0.51***	0.76***; 0.15**; 0.71***	-0.11*; -0.05ns; -0.27***	0.56***; 0.02ns; 0.43***	0.69***; 0.06ns; 0.33***	0.71***; 0.64***; 0.4***	0.11ns; 0.05ns; -0.04ns	-0.24***; -0.04ns; -0.45***	0ns; -0.08ns; -0.06ns	0.59***; 0.12*; 0.64***	-0.22***; 0.02ns; -0.2***
Almass_mg.g.1	0.33***; 0.06ns; 0.3***	0.05ns; 0.02ns; -0.01ns	-0.15**; -0.02ns; -0.2***	-0.14*; -0.01ns; -0.22***	0ns; -0.05ns; -0.07ns	0.34***; -0.03ns; 0.24***	-0.3***; 0.25***; -0.16**	0.1ns; -0.08ns; 0.02ns	0.23***; -0.04ns; 0.12*	-0.25***; 0.04ns; -0.04ns	-0.09ns; -0.01ns; -0.07ns	0.13*; -0.02ns; 0.07ns	0.2***; -0.08ns; 0.07ns	0.12*; -0.02ns; 0.03ns	0.11*; -0.02ns; 0.02ns	0.06ns; 0.02ns; -0.16*	0.08ns; 0.08ns; -0.1ns	0.28***; -0.01ns; 0.1ns	-0.08ns; -0.03ns; -0.05ns	0.06ns; 0.33***; 0.1ns	-0.01ns; 0.02ns; 0.05ns	0.03ns; -0.18**; -0.1ns	0.11ns; -0.11*; -0.07ns	0ns; -0.01ns; -0.12*	0.19***; -0.1ns; -0.01ns	0.12*; -0.08ns; -0.05ns	0.13*; -0.04ns; -0.03ns	0.15**; 0.11ns; 0.04ns	0.1ns; 0.27***; 0.04ns	0.26***; -0.01ns; 0.16**	0.23***; 0.05ns; 0.08ns	0.27***; 0.08ns; 0.19***	0.31***; -0.02ns; 0.09ns	0.34***; 0.05ns; 0.17**	0.07ns; 0.04ns; -0.05ns	0.15**; -0.05ns; -0.03ns	0.41***; 0.01ns; 0.32***	1***; 1***; 1***	0.5***; 0.47***; 0.47***	0.32***; 0.05ns; 0.19***	0.15**; -0.04ns; 0.01ns	0.29***; 0.18**; 0.18**	0.26***; 0.22**; 0.41***	0.28***; 0.36***; 0.41***	0.11ns; -0.03ns; 0.01ns	0.05ns; 0.1ns; -0.05ns	0.09ns; -0.04ns; 0.09ns	0.26***; -0.07ns; 0.09ns	0.11*; 0.16**; 0.17**
Asmass_mg.g.1	0.23***; 0.06ns; 0.11ns	0.17**; 0.07ns; 0.07ns	-0.07ns; -0.1ns; -0.15*	-0.04ns; -0.07ns; -0.12*	0.26***; 0.03ns; 0.2***	0.37***; 0.18**; 0.25***	-0.2***; 0.13*; -0.16**	0.05ns; -0.04ns; -0.02ns	0.19***; 0.04ns; 0.09ns	-0.2***; -0.05ns; -0.1ns	-0.16**; -0.08ns; -0.15**	0.19***; 0.12*; 0.16**	0.16**; 0.07ns; 0.08ns	0.31***; 0.02ns; 0.22***	0.29***; 0.09ns; 0.17**	0.14*; 0.12*; 0.11ns	0.11*; 0.07ns; 0.1ns	0.18**; 0.01ns; 0.06ns	0.06ns; 0.17**; 0.08ns	0.06ns; 0.04ns; 0.14ns	0.12*; 0.04ns; 0.01ns	-0.15**; -0.18**; -0.22***	0.2***; 0.09ns; 0.09ns	0.21***; 0.11ns; 0.15**	0.35***; 0.13*; 0.2***	0.44***; 0.13*; 0.31***	0.41***; 0.2***; 0.3***	0.51***; 0.15**; 0.37***	0.04ns; 0.05ns; -0.09ns	0.61***; 0.42***; 0.56***	0.38***; 0.26***; 0.28***	-0.07ns; -0.05ns; -0.19***	0.49***; 0.27***; 0.41***	0.34***; 0.14*; 0.22***	0.19***; 0.02ns; 0.05ns	0.47***; 0.09ns; 0.32***	0.58***; 0.39***; 0.51***	0.5***; 0.47***; 0.47***	1***; 1***; 1***	0.46***; 0.13*; 0.38***	-0.14**; -0.19***; -0.32***	0.59***; 0.26***; 0.48***	0.51***; 0.36***; 0.6***	0.41***; 0.34***; 0.2**	0.08ns; -0.07ns; -0.05ns	-0.07ns; -0.09ns; -0.21***	-0.11*; -0.11ns; -0.17**	0.43***; 0.23***; 0.36***	-0.04ns; 0.01ns; 0ns
Cdmass_mg.g.1	0.27***; 0.02ns; 0.16**	0.23***; -0.06ns; 0.13*	-0.04ns; -0.06ns; -0.12*	0.03ns; -0.08ns; -0.07ns	0.17**; 0.03ns; 0.1ns	0.41***; 0.14*; 0.34***	-0.34***; -0.05ns; -0.34***	0.28***; -0.01ns; 0.21***	0.34***; -0.02ns; 0.23***	-0.02ns; -0.01ns; 0.08ns	-0.07ns; -0.16**; -0.12*	0.15**; 0.17**; 0.13*	0.39***; 0.11*; 0.33***	0.14*; 0.01ns; 0.03ns	0.32***; 0.01ns; 0.15*	0.22***; 0ns; 0.22***	0.12*; 0.01ns; 0.1ns	0.21***; 0.01ns; 0.12ns	-0.04ns; 0.01ns; -0.04ns	0.14*; 0.02ns; 0.19*	0.12*; 0.08ns; 0.08ns	0.18***; -0.05ns; 0.13*	0.47***; 0.06ns; 0.37***	0.14*; 0.09ns; 0.09ns	0.57***; 0.2***; 0.48***	0.48***; 0.24***; 0.41***	0.36***; 0.19***; 0.3***	0.21***; 0ns; 0.04ns	-0.22***; -0.06ns; -0.39***	0.51***; 0.18**; 0.46***	0.45***; 0.13*; 0.39***	0.03ns; -0.05ns; -0.15*	0.59***; 0.02ns; 0.46***	0.62***; 0.15**; 0.55***	0.15**; 0.07ns; 0.05ns	0.42***; 0.32***; 0.35***	0.76***; 0.15**; 0.71***	0.32***; 0.05ns; 0.19***	0.46***; 0.13*; 0.38***	1***; 1***; 1***	-0.05ns; -0.06ns; -0.2***	0.38***; -0.02ns; 0.23***	0.55***; 0.03ns; 0.08ns	0.59***; 0.21**; 0.22**	0.15**; -0.05ns; 0.03ns	-0.17**; -0.13*; -0.39***	0.04ns; -0.06ns; -0.06ns	0.54***; 0.18**; 0.55***	-0.22***; -0.01ns; -0.24***
Rbmass_mg.g.1	-0.05ns; -0.1ns; -0.1ns	-0.07ns; -0.1ns; -0.11ns	-0.01ns; 0.02ns; 0.07ns	-0.02ns; 0.02ns; 0.03ns	-0.02ns; 0ns; 0ns	-0.12*; -0.2***; -0.19***	0.21***; -0.04ns; 0.26***	-0.33***; -0.33***; -0.43***	-0.32***; -0.19***; -0.41***	-0.05ns; -0.01ns; 0.18**	-0.26***; -0.21***; -0.25***	0.3***; 0.17**; 0.26***	-0.23***; -0.27***; -0.33***	-0.04ns; -0.12*; -0.09ns	-0.05ns; 0.05ns; 0.04ns	-0.13*; -0.19**; -0.12ns	0.02ns; -0.06ns; 0.12ns	-0.22***; -0.11ns; -0.21**	-0.2***; -0.19***; -0.21***	0.07ns; -0.23*; -0.35***	-0.28***; -0.15*; -0.14*	0.04ns; 0.03ns; 0.03ns	-0.16**; -0.28***; -0.32***	0.39***; 0.24***; 0.33***	-0.18***; -0.28***; -0.38***	0.11ns; 0.06ns; 0.01ns	0.22***; 0.04ns; 0.09ns	-0.17**; -0.29***; -0.36***	0.41***; 0.14*; 0.3***	0.01ns; -0.11*; -0.16**	0.12*; -0.11ns; -0.03ns	0.49***; 0.31***; 0.4***	-0.11ns; -0.13*; -0.32***	0.2***; 0.09ns; 0.11ns	0.51***; 0.26***; 0.44***	-0.03ns; -0.13*; -0.17**	-0.11*; -0.05ns; -0.27***	0.15**; -0.04ns; 0.01ns	-0.14**; -0.19***; -0.32***	-0.05ns; -0.06ns; -0.2***	1***; 1***; 1***	-0.22***; -0.26***; -0.42***	-0.24***; -0.08ns; -0.16*	-0.1ns; 0.11ns; 0.37***	-0.21***; -0.22***; -0.25***	0.39***; 0.17**; 0.26***	-0.23***; -0.24***; -0.3***	-0.25***; -0.23***; -0.38***	0.36***; 0.28***; 0.38***
Srmass_mg.g.1	0.16**; 0.08ns; 0ns	0.16**; 0.01ns; 0.05ns	-0.14*; -0.24***; -0.26***	-0.12*; -0.25***; -0.25***	0.24***; 0.1ns; 0.21***	0.22***; 0.05ns; 0.04ns	-0.14*; -0.01ns; -0.12*	0.06ns; -0.04ns; -0.05ns	0.2***; 0.15**; 0.07ns	-0.15**; -0.16**; -0.22***	-0.11ns; -0.12*; -0.15**	0.18**; 0.18**; 0.14*	0.17**; 0.06ns; 0.03ns	0.35***; 0.19***; 0.32***	0.28***; 0.05ns; 0.11ns	0.12*; 0.21***; 0.17**	0.07ns; 0.19**; 0.15*	0.05ns; 0ns; 0.07ns	0.02ns; -0.04ns; -0.05ns	0.13*; 0.36***; 0.31***	0.13*; -0.04ns; -0.1ns	-0.22***; -0.29***; -0.29***	0.2***; 0.06ns; 0.04ns	0.2***; 0.07ns; 0.13*	0.35***; 0.13*; 0.2***	0.48***; 0.22***; 0.35***	0.48***; 0.26***; 0.39***	0.74***; 0.48***; 0.68***	0.03ns; 0.02ns; -0.1ns	0.52***; 0.19***; 0.41***	0.28***; 0.08ns; 0.17**	-0.15**; -0.19***; -0.34***	0.41***; 0.03ns; 0.2***	0.28***; -0.05ns; 0.1ns	0.07ns; -0.13*; -0.09ns	0.5***; 0.11ns; 0.38***	0.56***; 0.02ns; 0.43***	0.29***; 0.18**; 0.18**	0.59***; 0.26***; 0.48***	0.38***; -0.02ns; 0.23***	-0.22***; -0.26***; -0.42***	1***; 1***; 1***	0.48***; 0.08ns; 0.18*	0.45***; 0.16*; 0.06ns	0.14*; -0.02ns; -0.03ns	-0.11*; -0.24***; -0.27***	-0.12*; -0.1ns; -0.17**	0.42***; 0.41***; 0.4***	-0.12*; -0.09ns; -0.17**
Semass_mg.g.1	0.22***; 0.09ns; 0.16*	0.18**; 0.08ns; 0.03ns	-0.06ns; -0.01ns; -0.09ns	0ns; 0.02ns; -0.09ns	0.2***; -0.02ns; 0.07ns	0.35***; 0.01ns; 0.12ns	-0.3***; 0.37***; 0.16*	0.26***; -0.06ns; -0.16*	0.33***; -0.02ns; -0.05ns	-0.07ns; -0.05ns; -0.15*	-0.06ns; 0.07ns; -0.14ns	0.09ns; -0.04ns; 0.13ns	0.36***; -0.08ns; -0.11ns	0.21***; 0.09ns; 0.27***	0.22***; 0.08ns; 0.1ns	0.17**; 0.02ns; 0.01ns	0.03ns; 0.1ns; 0.1ns	0.19***; 0.03ns; -0.1ns	-0.02ns; 0.22**; 0.01ns	0.18**; 0.07ns; -0.02ns	0.37***; 0.01ns; 0.15*	0.13*; -0.18*; -0.38***	0.4***; -0.07ns; -0.14ns	0.06ns; 0.02ns; 0.13ns	0.58***; -0.08ns; -0.07ns	0.48***; -0.04ns; 0.17*	0.29***; 0.07ns; 0.25***	0.29***; 0.06ns; 0.28***	-0.5***; 0.09ns; 0.22**	0.48***; 0ns; 0.12ns	0.25***; -0.02ns; 0.1ns	-0.32***; 0.11ns; -0.1ns	0.55***; -0.02ns; 0.03ns	0.19***; 0.03ns; 0.02ns	0ns; 0.15*; 0.14ns	0.35***; 0.09ns; 0.25***	0.69***; 0.06ns; 0.33***	0.26***; 0.22**; 0.41***	0.51***; 0.36***; 0.6***	0.55***; 0.03ns; 0.08ns	-0.24***; -0.08ns; -0.16*	0.48***; 0.08ns; 0.18*	1***; 1***; 1***	0.83***; 0.22**; 0.17*	0.11*; -0.07ns; -0.06ns	-0.38***; 0.19**; -0.04ns	0.01ns; -0.06ns; -0.19**	0.62***; -0.06ns; -0.12ns	-0.2***; 0.11ns; 0.13ns
Nimass_mg.g.1	0.21***; 0.03ns; 0.05ns	0.19***; -0.04ns; 0.02ns	-0.04ns; -0.11ns; -0.04ns	0.02ns; -0.12ns; -0.03ns	0.21***; -0.05ns; 0.08ns	0.28***; -0.1ns; -0.2**	-0.32***; 0.09ns; 0.12ns	0.24***; -0.2**; -0.24***	0.25***; -0.2**; -0.34***	0ns; 0.05ns; 0.44***	-0.05ns; -0.19*; -0.15*	0.09ns; 0.15*; 0.17*	0.34***; -0.16*; -0.19**	0.08ns; -0.15*; -0.2**	0.21***; 0.07ns; 0.11ns	0.09ns; -0.06ns; -0.01ns	-0.04ns; 0.01ns; 0.06ns	0.16**; -0.08ns; -0.13ns	-0.01ns; -0.05ns; -0.01ns	0.28***; -0.11ns; -0.16ns	0.27***; -0.16*; -0.2**	0.23***; -0.11ns; 0.01ns	0.37***; -0.22**; -0.21**	0.05ns; 0.08ns; 0.18*	0.52***; -0.23**; -0.27***	0.42***; -0.06ns; 0.02ns	0.22***; 0.01ns; 0.1ns	0.19***; 0.02ns; 0.01ns	-0.48***; 0.34***; 0.33***	0.43***; -0.06ns; -0.03ns	0.32***; 0.26***; 0.37***	-0.18***; 0.15*; 0.32***	0.53***; 0.06ns; -0.03ns	0.27***; 0.17*; 0.24***	0.07ns; 0.16*; 0.4***	0.29***; 0.01ns; 0.09ns	0.71***; 0.64***; 0.4***	0.28***; 0.36***; 0.41***	0.41***; 0.34***; 0.2**	0.59***; 0.21**; 0.22**	-0.1ns; 0.11ns; 0.37***	0.45***; 0.16*; 0.06ns	0.83***; 0.22**; 0.17*	1***; 1***; 1***	0.06ns; -0.16*; -0.25***	-0.32***; 0.2**; 0.16*	0.04ns; -0.16*; -0.17*	0.61***; -0.18*; -0.26***	-0.1ns; 0.3***; 0.44***
Chlarea_SPAD	0.14*; 0.2***; 0.13*	0.09ns; -0.03ns; -0.07ns	-0.05ns; -0.1ns; -0.12*	-0.02ns; -0.14*; -0.15**	-0.04ns; -0.04ns; -0.13*	0.31***; 0.27***; 0.2***	-0.29***; -0.01ns; -0.14*	0.57***; 0.48***; 0.45***	0.59***; 0.17**; 0.42***	-0.02ns; -0.01ns; -0.05ns	0.24***; 0.16**; 0.16**	-0.19***; -0.16**; -0.18**	0.52***; 0.45***; 0.4***	0.06ns; 0.05ns; 0ns	0.02ns; -0.1ns; -0.09ns	0.31***; 0.18**; 0.19**	0.14*; 0.07ns; -0.04ns	0.27***; 0.12ns; 0.22***	0.01ns; -0.05ns; -0.02ns	-0.17**; 0.22*; 0.25**	0ns; 0.16*; 0.08ns	0.2***; 0.13*; 0.12*	0.52***; 0.38***; 0.38***	-0.17**; -0.25***; -0.29***	0.39***; 0.2***; 0.23***	-0.1ns; -0.21***; -0.26***	-0.17**; -0.16**; -0.25***	0.04ns; -0.07ns; -0.09ns	-0.21***; -0.18**; -0.18**	0.02ns; -0.09ns; -0.11ns	-0.08ns; -0.08ns; -0.15*	-0.07ns; -0.12*; -0.1ns	0.16**; -0.04ns; 0.07ns	0.07ns; -0.04ns; -0.01ns	-0.32***; -0.33***; -0.37***	0.01ns; 0ns; -0.07ns	0.11ns; 0.05ns; -0.04ns	0.11ns; -0.03ns; 0.01ns	0.08ns; -0.07ns; -0.05ns	0.15**; -0.05ns; 0.03ns	-0.21***; -0.22***; -0.25***	0.14*; -0.02ns; -0.03ns	0.11*; -0.07ns; -0.06ns	0.06ns; -0.16*; -0.25***	1***; 1***; 1***	-0.01ns; -0.04ns; 0.03ns	0.26***; 0.4***; 0.3***	0.41***; 0.12*; 0.24***	-0.36***; -0.3***; -0.29***
N_P	-0.26***; -0.28***; -0.28***	-0.1ns; -0.08ns; -0.05ns	0.15**; 0.28***; 0.28***	0.15**; 0.28***; 0.27***	0.05ns; 0.07ns; 0.15**	-0.27***; -0.34***; -0.32***	0.42***; 0.22***; 0.48***	-0.25***; -0.35***; -0.32***	-0.29***; -0.26***; -0.38***	0.06ns; 0.02ns; -0.01ns	0.03ns; 0.05ns; 0.06ns	0.01ns; -0.09ns; -0.06ns	-0.33***; -0.41***; -0.42***	-0.05ns; 0.03ns; -0.01ns	0ns; -0.08ns; 0.02ns	-0.14**; -0.2**; -0.08ns	-0.06ns; -0.09ns; 0.08ns	-0.22***; -0.17**; -0.21**	0.05ns; 0.03ns; 0.01ns	-0.21***; -0.22*; -0.18ns	-0.23***; -0.26***; -0.22***	-0.04ns; -0.04ns; -0.08ns	-0.11*; -0.25***; -0.22***	0.34***; 0.22***; 0.27***	-0.51***; -0.69***; -0.77***	-0.41***; -0.59***; -0.68***	-0.12*; -0.33***; -0.31***	0.07ns; -0.01ns; -0.05ns	0.56***; 0.32***; 0.48***	-0.04ns; -0.22***; -0.26***	0.09ns; -0.12*; -0.09ns	0.48***; 0.22***; 0.37***	-0.23***; -0.08ns; -0.33***	0.04ns; 0.01ns; -0.1ns	0.22***; -0.04ns; 0.03ns	-0.02ns; -0.22***; -0.23***	-0.24***; -0.04ns; -0.45***	0.05ns; 0.1ns; -0.05ns	-0.07ns; -0.09ns; -0.21***	-0.17**; -0.13*; -0.39***	0.39***; 0.17**; 0.26***	-0.11*; -0.24***; -0.27***	-0.38***; 0.19**; -0.04ns	-0.32***; 0.2**; 0.16*	-0.01ns; -0.04ns; 0.03ns	1***; 1***; 1***	-0.19***; -0.29***; -0.28***	-0.34***; -0.51***; -0.56***	0.26***; 0.26***; 0.24***
C_N	0.2***; 0.33***; 0.25***	0.18***; 0.17**; 0.14*	-0.01ns; -0.14*; -0.13*	0.04ns; -0.11ns; -0.09ns	-0.18***; -0.15*; -0.39***	0.17**; 0.17**; 0.14*	-0.31***; -0.14*; -0.41***	0.65***; 0.73***; 0.69***	0.52***; 0.31***; 0.52***	0.24***; 0.15**; 0.16**	0.57***; 0.5***; 0.56***	-0.5***; -0.46***; -0.58***	0.44***; 0.44***; 0.43***	-0.35***; -0.17**; -0.37***	-0.24***; -0.21***; -0.33***	0.17**; -0.04ns; -0.11ns	-0.06ns; -0.12ns; -0.46***	0.36***; 0.22***; 0.22***	0.16**; 0.09ns; 0.19***	-0.05ns; 0.12ns; 0.01ns	0.24***; 0.32***; 0.24***	0.53***; 0.44***; 0.44***	0.23***; 0.12*; 0.14*	-0.82***; -0.85***; -0.98***	0.28***; 0.31***; 0.29***	-0.38***; -0.35***; -0.5***	-0.53***; -0.51***; -0.65***	-0.26***; -0.24***; -0.35***	-0.29***; -0.28***; -0.35***	-0.35***; -0.16**; -0.38***	-0.26***; -0.22***; -0.34***	0.06ns; 0.02ns; 0.08ns	0.06ns; -0.03ns; 0.03ns	-0.09ns; -0.12*; -0.16**	-0.47***; -0.49***; -0.61***	-0.34***; -0.16**; -0.43***	0ns; -0.08ns; -0.06ns	0.09ns; -0.04ns; 0.09ns	-0.11*; -0.11ns; -0.17**	0.04ns; -0.06ns; -0.06ns	-0.23***; -0.24***; -0.3***	-0.12*; -0.1ns; -0.17**	0.01ns; -0.06ns; -0.19**	0.04ns; -0.16*; -0.17*	0.26***; 0.4***; 0.3***	-0.19***; -0.29***; -0.28***	1***; 1***; 1***	0.33***; 0.12*; 0.16**	-0.06ns; -0.14*; -0.11*
SPAD_Narea	0.25***; 0.07ns; 0.1ns	0.25***; 0.06ns; 0.12*	-0.1ns; -0.26***; -0.25***	-0.04ns; -0.24***; -0.21***	0.14*; 0.04ns; 0.09ns	0.43***; 0.23***; 0.34***	-0.47***; -0.2***; -0.44***	0.54***; 0.22***; 0.43***	0.58***; 0.16**; 0.44***	-0.03ns; 0.02ns; 0.07ns	0.14*; -0.04ns; 0ns	-0.06ns; 0.08ns; 0.01ns	0.58***; 0.28***; 0.49***	0.12*; -0.05ns; 0.04ns	0.18**; 0.26***; 0.16**	0.19***; 0.1ns; 0.19**	-0.04ns; 0.03ns; -0.06ns	0.35***; 0.14*; 0.37***	0.11ns; -0.03ns; 0.05ns	-0.01ns; 0.16ns; 0.16ns	0.21***; 0.14*; 0.09ns	0.23***; 0.1ns; 0.15*	0.55***; 0.28***; 0.47***	-0.18***; -0.01ns; -0.13*	0.68***; 0.49***; 0.66***	0.3***; 0.44***; 0.38***	0.1ns; 0.24***; 0.14*	0.19***; 0.03ns; 0.08ns	-0.48***; -0.45***; -0.69***	0.36***; 0.48***; 0.46***	0.16**; 0.17**; 0.16**	-0.26***; -0.3***; -0.46***	0.54***; 0.13*; 0.53***	0.23***; 0ns; 0.12*	-0.12*; 0.02ns; -0.14*	0.25***; 0.25***; 0.25***	0.59***; 0.12*; 0.64***	0.26***; -0.07ns; 0.09ns	0.43***; 0.23***; 0.36***	0.54***; 0.18**; 0.55***	-0.25***; -0.23***; -0.38***	0.42***; 0.41***; 0.4***	0.62***; -0.06ns; -0.12ns	0.61***; -0.18*; -0.26***	0.41***; 0.12*; 0.24***	-0.34***; -0.51***; -0.56***	0.33***; 0.12*; 0.16**	1***; 1***; 1***	-0.31***; -0.2***; -0.32***
D13C_permil	-0.06ns; -0.11ns; -0.07ns	-0.08ns; -0.11ns; -0.1ns	-0.01ns; 0.06ns; 0.06ns	-0.05ns; 0.03ns; 0.02ns	-0.11ns; -0.12*; -0.1ns	-0.36***; -0.42***; -0.42***	0.45***; 0.21***; 0.44***	-0.5***; -0.47***; -0.53***	-0.54***; -0.28***; -0.56***	0.06ns; 0.08ns; 0.2***	-0.17**; -0.2***; -0.17**	0.19***; 0.12*; 0.17**	-0.45***; -0.43***; -0.48***	-0.17**; -0.19***; -0.15*	-0.09ns; 0.08ns; 0.1ns	-0.2***; -0.18**; -0.25***	-0.02ns; -0.1ns; 0.02ns	-0.31***; -0.01ns; -0.24***	-0.14*; -0.11ns; -0.04ns	0.25***; -0.46***; -0.41***	-0.05ns; -0.18**; -0.12ns	-0.03ns; -0.04ns; -0.02ns	-0.53***; -0.61***; -0.62***	0.2***; 0.08ns; 0.12*	-0.48***; -0.48***; -0.54***	-0.1ns; -0.07ns; -0.1ns	0.01ns; -0.07ns; -0.04ns	-0.04ns; -0.08ns; -0.08ns	0.39***; 0.28***; 0.34***	-0.2***; -0.07ns; -0.16**	0.06ns; -0.03ns; 0.01ns	0.3***; 0.27***; 0.32***	-0.13*; -0.07ns; -0.18**	-0.01ns; 0.04ns; 0ns	0.29***; 0.22***; 0.29***	-0.15**; -0.14*; -0.18**	-0.22***; 0.02ns; -0.2***	0.11*; 0.16**; 0.17**	-0.04ns; 0.01ns; 0ns	-0.22***; -0.01ns; -0.24***	0.36***; 0.28***; 0.38***	-0.12*; -0.09ns; -0.17**	-0.2***; 0.11ns; 0.13ns	-0.1ns; 0.3***; 0.44***	-0.36***; -0.3***; -0.29***	0.26***; 0.26***; 0.24***	-0.06ns; -0.14*; -0.11*	-0.31***; -0.2***; -0.32***	1***; 1***; 1***
TLP_.MPa	-0.04ns; 0ns; -0.04ns	0.1ns; 0.08ns; 0.09ns	0.16**; 0.11ns; 0.13*	0.2***; 0.17**; 0.17**	0.09ns; 0.07ns; 0.08ns	0.19***; 0.26***; 0.24***	-0.28***; -0.07ns; -0.33***	0.55***; 0.44***; 0.52***	0.39***; 0.19***; 0.33***	0.36***; 0.29***; 0.15**	0.62***; 0.53***; 0.57***	-0.56***; -0.48***; -0.57***	0.27***; 0.21***; 0.22***	-0.28***; -0.15**; -0.26***	0.01ns; -0.1ns; -0.2**	0.06ns; -0.01ns; -0.07ns	-0.17**; -0.08ns; -0.35***	0.42***; 0.09ns; 0.35***	0.53***; 0.53***; 0.5***	-0.12*; 0.06ns; -0.01ns	0.23***; 0.11ns; 0.12*	0.17**; 0.09ns; 0.1ns	0.44***; 0.43***; 0.44***	-0.33***; -0.34***; -0.34***	0.36***; 0.33***; 0.36***	-0.1ns; -0.17**; -0.17**	-0.19***; -0.16**; -0.22***	0.04ns; 0.06ns; 0.03ns	-0.25***; -0.27***; -0.32***	0.03ns; 0.09ns; 0.07ns	0.01ns; 0.07ns; 0.02ns	-0.03ns; -0.09ns; -0.11ns	0.18**; 0.23***; 0.24***	0.06ns; -0.05ns; -0.02ns	-0.26***; -0.29***; -0.33***	-0.09ns; -0.09ns; -0.1ns	0.19***; -0.06ns; 0.16**	0.02ns; -0.11ns; -0.03ns	0.09ns; 0.08ns; 0.09ns	0.13*; -0.08ns; 0.1ns	-0.33***; -0.32***; -0.42***	0.13*; 0.09ns; 0.1ns	0.16**; 0.02ns; -0.11ns	0.11*; -0.26***; -0.26***	0.23***; 0.14*; 0.15**	-0.06ns; -0.12*; -0.11*	0.37***; 0.26***; 0.33***	0.3***; 0.16**; 0.25***	-0.34***; -0.4***; -0.39***
K0.1_mmol.m.2.s.1.MPa.1	-0.24***; -0.1ns; -0.04ns	-0.21***; -0.02ns; -0.01ns	0ns; 0.16ns; 0.12ns	-0.05ns; 0.2ns; 0.12ns	-0.13*; 0.25ns; 0.14ns	-0.41***; -0.08ns; 0.01ns	0.34***; -0.28ns; -0.25ns	-0.44***; 0.03ns; 0.19ns	-0.43***; 0.06ns; 0.23ns	-0.06ns; -0.46**; -0.45**	-0.13*; 0.47**; 0.41*	0.08ns; -0.36*; -0.41*	-0.44***; -0.08ns; 0.02ns	-0.07ns; 0.32ns; 0.1ns	-0.24***; -0.24ns; 0ns	-0.34***; -0.59*; -0.69**	-0.17**; -0.55*; -0.55*	-0.39***; 0.68**; 0.51*	-0.11*; 0.41*; 0.22ns	-0.19***; 0.42*; 0.29ns	-0.26***; 0.16ns; 0.15ns	-0.13*; -0.26ns; -0.26ns	-0.52***; 0.04ns; 0.13ns	0.05ns; -0.09ns; -0.17ns	-0.58***; 0.1ns; 0.25ns	-0.31***; -0.02ns; 0.05ns	-0.17**; -0.18ns; -0.14ns	-0.13*; -0.3ns; -0.32ns	0.35***; -0.21ns; -0.21ns	-0.27***; 0.04ns; 0.16ns	-0.21***; -0.34ns; -0.17ns	0.11*; -0.35*; -0.35*	-0.39***; 0.04ns; 0.25ns	-0.29***; -0.07ns; -0.01ns	-0.03ns; -0.2ns; -0.15ns	-0.24***; -0.17ns; -0.2ns	-0.51***; -0.18ns; -0.04ns	-0.17**; -0.16ns; -0.19ns	-0.29***; -0.17ns; -0.16ns	-0.47***; -0.31ns; -0.32ns	0.19***; -0.07ns; -0.16ns	-0.27***; -0.14ns; -0.06ns	-0.42***; -0.13ns; -0.2ns	-0.39***; -0.17ns; -0.22ns	-0.16**; 0ns; -0.05ns	0.27***; -0.05ns; -0.26ns	-0.14*; -0.01ns; 0.14ns	-0.49***; -0.03ns; 0.07ns	0.29***; -0.38*; -0.33ns
psi_K0.1_80_.Mpa	-0.24***; -0.17ns; -0.12ns	-0.21***; -0.01ns; 0.1ns	0ns; -0.06ns; -0.1ns	-0.05ns; -0.05ns; -0.07ns	-0.13*; 0.1ns; -0.08ns	-0.41***; -0.05ns; -0.05ns	0.35***; 0.01ns; 0.28ns	-0.44***; -0.11ns; -0.03ns	-0.43***; -0.06ns; -0.04ns	-0.06ns; 0.06ns; 0.02ns	-0.14*; -0.08ns; -0.13ns	0.08ns; 0.05ns; 0.11ns	-0.44***; -0.08ns; 0.02ns	-0.07ns; 0.08ns; 0.06ns	-0.24***; 0.07ns; -0.06ns	-0.34***; 0.14ns; 0.39ns	-0.17**; 0.08ns; 0.23ns	-0.39***; -0.07ns; -0.14ns	-0.12*; -0.04ns; -0.08ns	-0.2***; -0.25ns; -0.32ns	-0.26***; 0.01ns; 0.07ns	-0.13*; 0.07ns; -0.09ns	-0.52***; 0.14ns; 0.22ns	0.06ns; 0.27ns; 0.26ns	-0.58***; -0.07ns; 0.01ns	-0.31***; 0.01ns; 0.06ns	-0.17**; 0.07ns; 0.09ns	-0.13*; 0.01ns; 0.16ns	0.35***; -0.05ns; 0.06ns	-0.27***; -0.16ns; -0.21ns	-0.21***; 0.19ns; 0.1ns	0.11*; -0.06ns; 0ns	-0.39***; 0.05ns; 0.06ns	-0.29***; -0.03ns; -0.07ns	-0.03ns; 0.16ns; 0.08ns	-0.23***; 0.03ns; 0.23ns	-0.51***; -0.07ns; -0.12ns	-0.17**; -0.11ns; -0.04ns	-0.29***; -0.15ns; -0.07ns	-0.47***; 0.05ns; 0.08ns	0.19***; 0.38*; 0.13ns	-0.27***; -0.13ns; -0.03ns	-0.41***; -0.08ns; 0.06ns	-0.39***; -0.08ns; -0.02ns	-0.16**; -0.03ns; 0ns	0.28***; 0.3ns; 0.26ns	-0.14*; -0.24ns; -0.27ns	-0.49***; -0.17ns; -0.17ns	0.29***; -0.04ns; -0.06ns
Jmax_area_umol.m.2.s.1	-0.13*; -0.19ns; -0.23ns	-0.17**; 0.1ns; 0.01ns	0ns; -0.06ns; 0ns	-0.04ns; -0.05ns; 0ns	-0.12*; 0.05ns; 0.24ns	-0.31***; -0.13ns; -0.23ns	0.24***; 0.14ns; 0.33*	-0.3***; -0.17ns; -0.16ns	-0.28***; 0.08ns; 0.02ns	-0.12*; -0.37*; -0.36*	-0.08ns; 0.05ns; 0.02ns	0.03ns; -0.02ns; -0.03ns	-0.3***; -0.2ns; -0.2ns	-0.1ns; 0.48**; 0.31*	-0.17**; 0.14ns; 0.21ns	-0.14*; -0.17ns; -0.03ns	-0.01ns; -0.18ns; -0.09ns	-0.2***; 0.28ns; 0.31ns	-0.1ns; 0.08ns; 0.14ns	-0.24***; 0.34ns; 0.29ns	-0.08ns; 0.02ns; 0.01ns	-0.04ns; -0.43**; -0.47**	-0.4***; 0.06ns; 0.03ns	-0.04ns; 0.26ns; 0.3ns	-0.46***; -0.1ns; -0.14ns	-0.33***; 0.04ns; 0.07ns	-0.2***; 0.14ns; 0.17ns	-0.1ns; 0.28ns; 0.26ns	0.26***; 0.26ns; 0.26ns	-0.24***; 0.08ns; 0.15ns	-0.17**; -0.14ns; -0.08ns	0.19***; 0.1ns; -0.05ns	-0.33***; -0.02ns; -0.1ns	-0.18**; 0.06ns; -0.06ns	-0.07ns; -0.17ns; -0.09ns	-0.26***; -0.06ns; 0.14ns	-0.37***; 0.02ns; 0.04ns	-0.03ns; -0.04ns; -0.09ns	-0.22***; 0.04ns; 0.07ns	-0.37***; 0.01ns; 0.09ns	0.12*; -0.06ns; -0.18ns	-0.17**; 0.34*; 0.37*	-0.33***; -0.09ns; -0.07ns	-0.28***; -0.33*; -0.33*	-0.1ns; 0.02ns; 0.01ns	0.2***; 0.22ns; 0.26ns	-0.03ns; -0.3*; -0.34*	-0.38***; -0.23ns; -0.25ns	0.27***; -0.31*; -0.24ns
Vcmax_area_umol.m.2.s.1	-0.17**; -0.24ns; -0.32*	-0.17**; -0.02ns; -0.14ns	0.05ns; 0.15ns; 0.3*	0ns; 0.13ns; 0.26ns	-0.07ns; 0.13ns; 0.27ns	-0.34***; -0.03ns; -0.2ns	0.28***; -0.01ns; 0.36*	-0.35***; -0.15ns; -0.24ns	-0.34***; -0.06ns; -0.19ns	-0.1ns; -0.15ns; -0.15ns	-0.12*; -0.02ns; -0.08ns	0.08ns; -0.01ns; 0.08ns	-0.34***; -0.09ns; -0.23ns	-0.07ns; 0.24ns; 0.19ns	-0.12*; -0.13ns; -0.07ns	-0.19***; -0.33*; -0.42**	-0.06ns; -0.33*; -0.4*	-0.26***; 0.68***; 0.65***	-0.08ns; 0.19ns; 0.24ns	-0.21***; -0.16ns; -0.31ns	-0.11*; -0.04ns; -0.13ns	-0.09ns; -0.27ns; -0.37**	-0.42***; 0.12ns; 0ns	0.02ns; 0.18ns; 0.38**	-0.47***; 0.12ns; -0.07ns	-0.26***; 0.21ns; 0.36*	-0.13*; 0.02ns; 0.13ns	-0.04ns; -0.02ns; 0ns	0.29***; 0.01ns; 0.2ns	-0.19***; -0.08ns; -0.01ns	-0.12*; -0.13ns; -0.05ns	0.14*; -0.14ns; -0.19ns	-0.28***; 0.07ns; 0.04ns	-0.17**; 0.04ns; -0.09ns	-0.01ns; -0.06ns; 0.27ns	-0.18**; -0.1ns; 0.19ns	-0.34***; -0.01ns; -0.12ns	-0.05ns; 0.18ns; -0.01ns	-0.19***; 0.02ns; -0.05ns	-0.34***; 0.08ns; 0.09ns	0.13*; 0.16ns; 0.14ns	-0.13*; 0.02ns; -0.09ns	-0.29***; 0.14ns; 0.13ns	-0.21***; -0.2ns; -0.12ns	-0.15**; -0.04ns; -0.21ns	0.21***; 0.04ns; 0.11ns	-0.09ns; -0.27ns; -0.4**	-0.37***; -0.23ns; -0.37*	0.29***; -0.02ns; 0.06ns
gc_mod_mol.m.2.s.1	0.22***; 0.2***; 0.17**	0.29***; 0.24***; 0.23***	0ns; -0.06ns; -0.05ns	0.1ns; 0.02ns; 0.03ns	0.04ns; 0.03ns; -0.09ns	0.45***; 0.45***; 0.42***	-0.41***; -0.11*; -0.42***	0.69***; 0.67***; 0.69***	0.59***; 0.26***; 0.52***	0.23***; 0.3***; 0.35***	0.2***; 0.23***; 0.22***	-0.13*; -0.17**; -0.21***	0.69***; 0.67***; 0.68***	-0.11*; -0.19**; -0.26***	0.12*; -0.15*; -0.19**	0.34***; 0.1ns; 0.13*	0.11*; -0.18**; -0.24***	0.4***; 0.05ns; 0.21***	0.1ns; 0.16**; 0.18**	0.18**; -0.08ns; -0.17ns	0.28***; 0.28***; 0.22***	0.3***; 0.3***; 0.31***	0.74***; 0.69***; 0.7***	-0.14*; -0.26***; -0.3***	0.79***; 0.61***; 0.73***	0.29***; 0.12*; 0.15**	0.07ns; 0ns; -0.07ns	0.09ns; -0.14*; -0.16**	-0.31***; -0.38***; -0.51***	0.09ns; 0.02ns; -0.02ns	0.16**; 0.1ns; 0.05ns	-0.04ns; -0.17**; -0.19***	0.51***; 0.11ns; 0.36***	0.3***; 0.02ns; 0.12*	-0.03ns; -0.15*; -0.17**	0.09ns; 0.11ns; -0.05ns	0.44***; 0.1ns; 0.33***	0.25***; -0.06ns; 0.1ns	0.25***; 0.05ns; 0.1ns	0.43***; 0.09ns; 0.29***	-0.08ns; -0.22***; -0.2***	0.23***; 0.05ns; 0.04ns	0.42***; -0.03ns; -0.04ns	0.41***; -0.11ns; 0.02ns	0.38***; 0.3***; 0.25***	-0.27***; -0.43***; -0.43***	0.31***; 0.35***; 0.34***	0.51***; 0.29***; 0.44***	-0.04ns; -0.01ns; -0.01ns
gc_gmax	0.56***; 0.4***; 0.45***	0.33***; -0.01ns; 0.06ns	-0.33***; -0.53***; -0.74***	-0.27***; -0.57***; -0.76***	0.08ns; -0.13*; -0.23***	0.56***; 0.31***; 0.35***	-0.45***; -0.18**; -0.48***	0.41***; 0.47***; 0.41***	0.48***; 0.26***; 0.4***	-0.12*; 0.02ns; 0.15*	-0.05ns; 0ns; -0.03ns	0.12*; 0ns; 0.03ns	0.53***; 0.51***; 0.5***	0.21***; -0.06ns; -0.03ns	0.1ns; -0.08ns; -0.08ns	0.23***; 0.02ns; -0.03ns	0.13*; -0.08ns; -0.16*	0.31***; 0.11ns; 0.2**	-0.15**; -0.08ns; -0.01ns	0.21***; 0.06ns; 0.02ns	0.15**; 0.27***; 0.15*	0.19***; 0.11ns; 0.14*	0.43***; 0.28***; 0.3***	-0.09ns; -0.27***; -0.31***	0.64***; 0.39***; 0.53***	0.39***; 0.13*; 0.23***	0.22***; 0.01ns; 0.01ns	0.21***; -0.03ns; -0.04ns	-0.27***; -0.22***; -0.38***	0.26***; -0.02ns; 0.04ns	0.16**; -0.03ns; -0.02ns	-0.16**; -0.11ns; -0.24***	0.47***; 0ns; 0.26***	0.26***; -0.02ns; 0.1ns	-0.04ns; -0.16**; -0.22***	0.25***; 0.12*; 0.04ns	0.5***; 0.04ns; 0.34***	0.36***; -0.04ns; 0.22***	0.37***; -0.03ns; 0.13*	0.4***; 0.11ns; 0.22***	-0.04ns; -0.13*; -0.16**	0.41***; 0.21***; 0.22***	0.5***; -0.04ns; 0.04ns	0.47***; -0.04ns; 0.01ns	0.29***; 0.38***; 0.28***	-0.38***; -0.42***; -0.52***	0.22***; 0.38***; 0.32***	0.52***; 0.22***; 0.45***	-0.08ns; -0.01ns; -0.01ns
gmax_Narea_mol.g.1.s.1	-0.01ns; -0.33***; -0.38***	0.16**; -0.15**; -0.07ns	0.69***; 0.69***; 0.67***	0.72***; 0.68***; 0.67***	0.26***; 0.08ns; 0.09ns	-0.09ns; -0.42***; -0.51***	0.42***; 0.24***; 0.57***	-0.32***; -0.49***; -0.57***	-0.3***; -0.29***; -0.58***	-0.02ns; -0.02ns; -0.06ns	0.01ns; -0.01ns; -0.02ns	0.04ns; -0.02ns; 0.01ns	-0.35***; -0.53***; -0.64***	-0.01ns; -0.02ns; -0.08ns	-0.1ns; -0.02ns; 0.07ns	-0.11ns; -0.12ns; -0.14*	-0.03ns; -0.06ns; 0.09ns	-0.27***; -0.11ns; -0.33***	0.02ns; 0.03ns; -0.03ns	-0.04ns; -0.09ns; -0.12ns	-0.02ns; -0.19**; -0.16**	-0.03ns; -0.14*; -0.14*	-0.32***; -0.55***; -0.63***	0.12*; 0.07ns; 0.17**	-0.35***; -0.53***; -0.64***	-0.12*; -0.23***; -0.19**	0.02ns; -0.11ns; 0ns	-0.01ns; 0.03ns; 0.01ns	0.27***; 0.36***; 0.49***	-0.06ns; -0.09ns; -0.17**	0.03ns; -0.06ns; 0ns	0.18***; 0.26***; 0.34***	-0.15**; -0.1ns; -0.3***	-0.09ns; -0.07ns; -0.12*	0.15**; 0.14*; 0.3***	-0.03ns; -0.17**; -0.13*	-0.23***; -0.12*; -0.41***	-0.09ns; 0.11ns; -0.11ns	-0.05ns; -0.05ns; -0.14*	-0.16**; -0.07ns; -0.32***	0.18***; 0.16**; 0.29***	-0.12*; -0.21***; -0.22***	-0.19***; 0.08ns; 0.01ns	-0.15**; 0.02ns; 0.12ns	-0.31***; -0.37***; -0.41***	0.25***; 0.4***; 0.39***	0ns; -0.19***; -0.19**	-0.26***; -0.4***; -0.52***	0.37***; 0.42***; 0.49***
HmaxTRY_m	-0.01ns; 0.3***; 0.05ns	-0.06ns; -0.1ns; -0.08ns	0.01ns; 0.11ns; 0.15*	0.03ns; 0.09ns; 0.12*	-0.2***; -0.18**; -0.26***	-0.07ns; -0.08ns; -0.21***	0.21***; 0.14*; 0.34***	0.02ns; 0.1ns; -0.02ns	0.02ns; 0.15**; -0.07ns	0ns; -0.02ns; 0.07ns	0.17**; 0.22***; 0.29***	-0.2***; -0.3***; -0.32***	-0.07ns; -0.04ns; -0.19**	-0.12*; -0.16**; -0.23***	-0.13*; -0.17**; -0.21**	0.17**; -0.07ns; 0ns	0.19***; -0.04ns; 0.04ns	0.05ns; 0.21**; -0.16*	-0.03ns; -0.05ns; 0.02ns	0.1ns; -0.08ns; 0.04ns	0.23***; 0.37***; 0.26***	0.01ns; 0.09ns; 0.04ns	-0.04ns; -0.14*; -0.16**	-0.11*; -0.26***; -0.18**	-0.11*; -0.07ns; -0.18**	-0.24***; -0.23***; -0.3***	-0.21***; -0.34***; -0.32***	-0.03ns; 0.01ns; -0.05ns	0.06ns; 0.04ns; 0.18**	-0.24***; -0.26***; -0.41***	-0.22***; -0.24***; -0.27***	0.14**; 0.12*; 0.34***	-0.35***; -0.22***; -0.52***	-0.14*; -0.11ns; -0.18**	-0.14**; -0.11ns; -0.12*	-0.21***; -0.25***; -0.36***	-0.12*; -0.06ns; -0.23***	-0.07ns; 0.1ns; -0.01ns	-0.09ns; -0.06ns; -0.21***	-0.23***; -0.12*; -0.35***	-0.06ns; -0.08ns; 0.03ns	-0.11*; -0.1ns; -0.23***	-0.12*; 0.05ns; -0.01ns	-0.16**; 0.01ns; -0.04ns	-0.01ns; -0.02ns; 0.02ns	0.08ns; 0.03ns; 0.18**	0.08ns; 0.27***; 0.17**	-0.18**; -0.26***; -0.38***	0.06ns; 0.16**; 0.18**
SeedMassTRY_mg	-0.27***; -0.09ns; -0.23***	-0.12*; -0.05ns; -0.1ns	0.23***; 0.16*; 0.36***	0.22***; 0.17**; 0.34***	0.02ns; -0.03ns; 0.03ns	-0.26***; -0.15*; -0.27***	0.35***; 0.2***; 0.45***	-0.02ns; -0.13*; -0.06ns	-0.11*; -0.07ns; -0.14*	0.18**; -0.09ns; 0.03ns	0.24***; -0.02ns; 0.25***	-0.23***; 0.02ns; -0.28***	-0.19***; -0.14*; -0.24***	-0.14*; 0.12*; -0.13*	-0.09ns; 0.01ns; -0.11ns	0ns; 0.01ns; 0.07ns	-0.03ns; 0.02ns; 0.06ns	-0.05ns; -0.04ns; -0.04ns	0.25***; 0.06ns; 0.21***	-0.07ns; 0.15ns; -0.03ns	0.23***; 0.05ns; 0.23***	-0.1ns; -0.12*; -0.06ns	0ns; -0.11ns; -0.05ns	0.02ns; 0.05ns; 0.04ns	-0.11*; -0.11ns; -0.17**	-0.15**; -0.02ns; -0.2***	-0.15**; -0.03ns; -0.19**	-0.03ns; 0.34***; 0.07ns	0.12*; 0.17**; 0.19**	-0.23***; -0.06ns; -0.32***	-0.12*; -0.01ns; -0.1ns	0.12*; -0.01ns; 0.2***	-0.18**; -0.05ns; -0.32***	-0.15**; -0.05ns; -0.19**	-0.02ns; -0.05ns; -0.04ns	-0.16**; -0.06ns; -0.22***	-0.17**; -0.03ns; -0.21***	-0.18**; 0.11ns; -0.07ns	-0.15**; 0.02ns; -0.14*	-0.19***; -0.03ns; -0.24***	-0.04ns; -0.08ns; -0.09ns	-0.1ns; 0.32***; -0.1ns	-0.09ns; 0.06ns; 0.07ns	-0.11*; -0.05ns; -0.01ns	-0.04ns; -0.05ns; 0.01ns	0.17**; 0.08ns; 0.24***	-0.03ns; -0.11ns; -0.05ns	-0.18**; 0ns; -0.26***	0.06ns; 0.07ns; 0.05ns
GSAI	-0.13*; -0.12*; -0.16**	-0.16**; -0.09ns; -0.11ns	0.09ns; 0.07ns; 0.14*	0.02ns; 0.06ns; 0.11ns	-0.15**; 0.03ns; -0.11ns	-0.39***; -0.38***; -0.5***	0.29***; 0.03ns; 0.38***	-0.3***; -0.22***; -0.3***	-0.32***; -0.16**; -0.33***	0ns; -0.02ns; -0.02ns	0.04ns; 0.05ns; 0.11ns	-0.1ns; -0.11ns; -0.12*	-0.39***; -0.31***; -0.4***	-0.2***; -0.03ns; -0.09ns	-0.32***; -0.17**; -0.17**	-0.21***; -0.12*; -0.15*	-0.12*; -0.09ns; -0.03ns	-0.2***; -0.06ns; -0.13*	-0.09ns; -0.12*; -0.06ns	0.15**; -0.04ns; -0.21*	0.07ns; -0.06ns; 0ns	0.03ns; 0.11ns; 0.1ns	-0.45***; -0.36***; -0.46***	-0.09ns; -0.08ns; -0.06ns	-0.42***; -0.21***; -0.36***	-0.27***; -0.07ns; -0.15**	-0.28***; -0.21***; -0.21***	-0.26***; -0.09ns; -0.12*	0.09ns; 0.06ns; 0.19***	-0.31***; -0.15**; -0.28***	-0.31***; -0.25***; -0.28***	0.14**; 0.06ns; 0.22***	-0.31***; -0.16**; -0.3***	-0.19***; -0.09ns; -0.13*	0.02ns; 0.06ns; 0.16**	-0.32***; -0.15**; -0.25***	-0.33***; -0.08ns; -0.27***	-0.16**; 0ns; -0.11ns	-0.3***; -0.18**; -0.26***	-0.34***; -0.1ns; -0.31***	0.11*; 0.15**; 0.21***	-0.23***; 0.03ns; -0.13*	-0.19***; -0.04ns; -0.11ns	-0.12*; 0.04ns; 0.08ns	-0.21***; -0.12*; -0.16**	0.1ns; 0.09ns; 0.16**	0.03ns; 0.06ns; 0.08ns	-0.23***; 0.04ns; -0.17**	0.37***; 0.36***; 0.44***
GSPET	-0.18***; -0.07ns; -0.08ns	-0.13*; -0.02ns; -0.04ns	0.07ns; 0.27***; 0.17**	0.06ns; 0.27***; 0.16**	-0.22***; -0.12*; -0.2***	-0.43***; -0.36***; -0.42***	0.42***; 0.24***; 0.45***	-0.29***; -0.18***; -0.26***	-0.39***; -0.18**; -0.33***	0.07ns; 0.1ns; 0.14*	0.01ns; 0.02ns; 0.06ns	-0.08ns; -0.11*; -0.08ns	-0.35***; -0.25***; -0.31***	-0.25***; -0.18**; -0.24***	-0.21***; -0.18**; -0.14*	-0.12*; -0.19**; -0.17**	-0.01ns; -0.15*; -0.05ns	-0.22***; -0.08ns; -0.22***	-0.07ns; -0.03ns; -0.04ns	-0.21***; -0.49***; -0.57***	-0.15**; -0.07ns; -0.05ns	-0.12*; -0.05ns; -0.04ns	-0.39***; -0.38***; -0.4***	-0.06ns; -0.1ns; -0.06ns	-0.51***; -0.4***; -0.48***	-0.43***; -0.33***; -0.38***	-0.32***; -0.32***; -0.31***	-0.25***; -0.07ns; -0.18**	0.35***; 0.28***; 0.48***	-0.52***; -0.34***; -0.5***	-0.19***; -0.18**; -0.18**	0.19***; 0.12*; 0.33***	-0.44***; -0.2***; -0.4***	-0.24***; -0.09ns; -0.14*	0.05ns; 0.07ns; 0.17**	-0.33***; -0.21***; -0.28***	-0.57***; -0.11*; -0.53***	-0.16**; 0.12*; -0.03ns	-0.36***; -0.18**; -0.3***	-0.49***; -0.11*; -0.44***	0.21***; 0.21***; 0.36***	-0.47***; -0.31***; -0.45***	-0.53***; -0.01ns; -0.01ns	-0.45***; 0.19**; 0.33***	-0.2***; -0.05ns; -0.1ns	0.3***; 0.4***; 0.4***	-0.03ns; 0.01ns; 0.04ns	-0.5***; -0.49***; -0.53***	0.35***; 0.4***; 0.43***
GSppt	-0.24***; -0.18**; -0.17**	-0.15**; -0.07ns; -0.08ns	0.13*; 0.3***; 0.21***	0.09ns; 0.3***; 0.19***	-0.19***; -0.07ns; -0.18**	-0.5***; -0.47***; -0.57***	0.46***; 0.22***; 0.53***	-0.32***; -0.28***; -0.34***	-0.42***; -0.24***; -0.41***	0.11ns; 0.1ns; 0.09ns	0.03ns; 0.04ns; 0.11*	-0.1ns; -0.13*; -0.12*	-0.4***; -0.37***; -0.43***	-0.31***; -0.18**; -0.22***	-0.33***; -0.23***; -0.21***	-0.19***; -0.17**; -0.18**	-0.1ns; -0.12ns; -0.04ns	-0.29***; -0.15*; -0.26***	-0.05ns; -0.05ns; -0.04ns	-0.09ns; -0.43***; -0.53***	-0.04ns; -0.12*; -0.04ns	-0.07ns; 0ns; 0.03ns	-0.47***; -0.48***; -0.52***	-0.09ns; -0.12*; -0.07ns	-0.56***; -0.47***; -0.54***	-0.44***; -0.35***; -0.36***	-0.35***; -0.38***; -0.34***	-0.3***; -0.13*; -0.2***	0.31***; 0.29***; 0.45***	-0.53***; -0.36***; -0.51***	-0.3***; -0.26***; -0.28***	0.19***; 0.14*; 0.35***	-0.39***; -0.2***; -0.42***	-0.26***; -0.1ns; -0.16**	0.08ns; 0.1ns; 0.21***	-0.4***; -0.26***; -0.33***	-0.59***; -0.12*; -0.53***	-0.22***; 0.11ns; -0.1ns	-0.4***; -0.23***; -0.36***	-0.52***; -0.14*; -0.47***	0.22***; 0.28***; 0.36***	-0.44***; -0.25***; -0.4***	-0.47***; -0.03ns; -0.1ns	-0.36***; 0.22**; 0.31***	-0.24***; -0.1ns; -0.15**	0.29***; 0.42***; 0.38***	0.02ns; 0.02ns; 0.07ns	-0.45***; -0.43***; -0.47***	0.47***; 0.51***; 0.52***
GStavg	-0.2***; -0.13*; -0.13*	-0.08ns; 0.01ns; 0.01ns	0.15**; 0.33***; 0.25***	0.16**; 0.36***; 0.27***	-0.14**; -0.11*; -0.13*	-0.37***; -0.31***; -0.31***	0.46***; 0.28***; 0.47***	-0.24***; -0.18**; -0.21***	-0.36***; -0.17**; -0.3***	0.11*; 0.16**; 0.21***	-0.02ns; -0.02ns; -0.01ns	-0.02ns; -0.05ns; 0ns	-0.27***; -0.2***; -0.22***	-0.23***; -0.21***; -0.27***	-0.1ns; -0.09ns; -0.04ns	-0.04ns; -0.1ns; -0.01ns	0.04ns; -0.07ns; 0.05ns	-0.25***; -0.15*; -0.31***	0.03ns; 0.03ns; 0.02ns	-0.24***; -0.52***; -0.58***	-0.11*; -0.09ns; -0.07ns	-0.13*; -0.09ns; -0.09ns	-0.28***; -0.3***; -0.28***	0.01ns; -0.06ns; 0.01ns	-0.47***; -0.4***; -0.44***	-0.39***; -0.36***; -0.38***	-0.25***; -0.26***; -0.25***	-0.21***; -0.07ns; -0.18**	0.42***; 0.31***; 0.52***	-0.44***; -0.28***; -0.41***	-0.06ns; -0.04ns; -0.02ns	0.17**; 0.1ns; 0.23***	-0.37***; -0.01ns; -0.2***	-0.18**; -0.01ns; -0.09ns	0.1ns; 0.09ns; 0.17**	-0.2***; -0.18**; -0.16**	-0.54***; -0.06ns; -0.51***	-0.18***; 0.09ns; -0.09ns	-0.31***; -0.1ns; -0.23***	-0.37***; -0.05ns; -0.32***	0.19***; 0.19***; 0.28***	-0.51***; -0.36***; -0.51***	-0.58***; 0.02ns; -0.07ns	-0.48***; 0.13ns; 0.28***	-0.22***; -0.06ns; -0.08ns	0.39***; 0.44***; 0.45***	-0.04ns; -0.05ns; -0.02ns	-0.5***; -0.55***; -0.56***	0.31***; 0.33***; 0.32***
AI_mean	-0.13*; -0.05ns; -0.09ns	-0.23***; -0.21***; -0.19***	0.03ns; 0.14*; 0.14*	-0.03ns; 0.08ns; 0.07ns	-0.32***; -0.11ns; -0.28***	-0.47***; -0.46***; -0.55***	0.38***; 0.15**; 0.45***	-0.43***; -0.34***; -0.4***	-0.52***; -0.27***; -0.46***	0.05ns; 0.06ns; 0.16**	-0.04ns; -0.03ns; 0.07ns	-0.03ns; -0.07ns; -0.09ns	-0.49***; -0.43***; -0.49***	-0.33***; -0.25***; -0.24***	-0.29***; -0.1ns; -0.14*	-0.19***; -0.17**; -0.28***	-0.02ns; -0.09ns; -0.05ns	-0.25***; 0.04ns; -0.14*	-0.24***; -0.23***; -0.16**	0.19***; -0.5***; -0.39***	-0.17**; -0.14*; -0.03ns	0.04ns; 0.1ns; 0.16**	-0.6***; -0.6***; -0.6***	-0.06ns; -0.05ns; -0.08ns	-0.62***; -0.54***; -0.57***	-0.43***; -0.23***; -0.32***	-0.36***; -0.32***; -0.34***	-0.44***; -0.23***; -0.31***	0.26***; 0.31***; 0.38***	-0.51***; -0.32***; -0.5***	-0.29***; -0.3***; -0.33***	0.36***; 0.42***; 0.54***	-0.56***; -0.27***; -0.58***	-0.2***; 0ns; -0.12*	0.05ns; 0.13*; 0.19**	-0.46***; -0.32***; -0.44***	-0.51***; -0.12*; -0.47***	-0.12*; 0.07ns; 0.02ns	-0.45***; -0.28***; -0.4***	-0.48***; -0.17**; -0.5***	0.38***; 0.46***; 0.55***	-0.5***; -0.29***; -0.41***	-0.48***; -0.03ns; -0.19**	-0.36***; 0.11ns; 0.39***	-0.34***; -0.22***; -0.21***	0.21***; 0.3***; 0.32***	-0.03ns; 0.06ns; 0.1ns	-0.53***; -0.41***; -0.5***	0.51***; 0.62***; 0.61***
PET_mean	0.06ns; 0ns; -0.01ns	0.21***; 0.18**; 0.18**	0.04ns; -0.08ns; -0.04ns	0.07ns; -0.03ns; 0.02ns	0.31***; 0.1ns; 0.27***	0.43***; 0.52***; 0.47***	-0.36***; -0.15**; -0.38***	0.44***; 0.33***; 0.41***	0.52***; 0.28***; 0.47***	-0.02ns; -0.04ns; -0.19***	0.06ns; 0ns; -0.01ns	0.02ns; 0.1ns; 0.02ns	0.49***; 0.44***; 0.46***	0.27***; 0.24***; 0.21***	0.24***; 0.03ns; 0.01ns	0.12*; 0.25***; 0.24***	-0.08ns; 0.18**; -0.01ns	0.2***; -0.01ns; 0.19**	0.24***; 0.21***; 0.17**	-0.23***; 0.28**; 0ns	0.12*; 0.05ns; 0.04ns	-0.06ns; -0.17**; -0.16**	0.54***; 0.61***; 0.55***	-0.02ns; 0.02ns; 0ns	0.55***; 0.53***; 0.51***	0.34***; 0.18**; 0.22***	0.26***; 0.32***; 0.22***	0.34***; 0.18**; 0.26***	-0.24***; -0.26***; -0.37***	0.4***; 0.27***; 0.35***	0.21***; 0.24***; 0.18**	-0.36***; -0.38***; -0.54***	0.59***; 0.18**; 0.52***	0.17**; -0.07ns; 0ns	-0.06ns; -0.15**; -0.18**	0.36***; 0.26***; 0.32***	0.41***; 0.12*; 0.34***	0.09ns; -0.06ns; -0.04ns	0.36***; 0.21***; 0.29***	0.44***; 0.12*; 0.37***	-0.33***; -0.4***; -0.49***	0.44***; 0.31***; 0.36***	0.42***; 0.03ns; 0.14ns	0.34***; -0.11ns; -0.26***	0.33***; 0.24***; 0.24***	-0.16**; -0.29***; -0.28***	0.09ns; -0.05ns; -0.02ns	0.54***; 0.39***; 0.48***	-0.42***; -0.55***; -0.5***
MAT_mean	-0.07ns; -0.17**; -0.18**	0.15**; 0.17**; 0.15**	0.11*; 0.17**; 0.19***	0.15**; 0.25***; 0.25***	0.19***; 0.04ns; 0.18**	0.16**; 0.17**; 0.11ns	-0.05ns; 0.05ns; 0.07ns	0.25***; 0.12*; 0.15**	0.26***; 0.1ns; 0.13*	0.06ns; 0.06ns; -0.05ns	-0.02ns; -0.02ns; 0.01ns	0.08ns; 0.06ns; 0.01ns	0.3***; 0.21***; 0.16**	0.07ns; 0.07ns; 0ns	0.16**; -0.07ns; -0.06ns	0.06ns; 0.11ns; 0.17**	-0.07ns; 0.06ns; -0.01ns	-0.01ns; -0.13*; -0.07ns	0.24***; 0.23***; 0.17**	-0.34***; -0.18ns; -0.38***	0.05ns; -0.04ns; -0.04ns	-0.17**; -0.22***; -0.22***	0.3***; 0.26***; 0.19***	-0.01ns; -0.07ns; 0ns	0.2***; 0.14*; 0.06ns	0.07ns; -0.11*; -0.08ns	0.11ns; 0.04ns; 0ns	0.18**; 0.09ns; 0.13*	0.11ns; 0ns; 0.05ns	0.08ns; 0.03ns; -0.02ns	0.16**; 0.16**; 0.07ns	-0.2***; -0.28***; -0.31***	0.41***; 0.21***; 0.29***	0.07ns; -0.13*; -0.15**	0.05ns; -0.06ns; 0.01ns	0.21***; 0.1ns; 0.15**	0.02ns; 0.05ns; -0.08ns	0ns; 0.02ns; -0.12*	0.14*; 0.11ns; 0.06ns	0.17**; 0.06ns; 0.05ns	-0.15**; -0.19***; -0.22***	0.1ns; 0.04ns; 0ns	0ns; 0.01ns; 0.02ns	0.01ns; 0.06ns; 0ns	0.16**; 0.13*; 0.1ns	0.14*; 0.07ns; 0.07ns	0.07ns; -0.07ns; -0.03ns	0.19***; 0ns; 0.06ns	-0.14*; -0.17**; -0.12*
MAP_mean	-0.21***; -0.12*; -0.14*	-0.21***; -0.17**; -0.17**	0.09ns; 0.24***; 0.18**	0.05ns; 0.19***; 0.12*	-0.27***; -0.09ns; -0.25***	-0.46***; -0.5***; -0.54***	0.36***; 0.19***; 0.45***	-0.33***; -0.29***; -0.36***	-0.42***; -0.25***; -0.42***	0.07ns; 0.07ns; 0.15**	0ns; 0.04ns; 0.11*	-0.07ns; -0.14*; -0.13*	-0.4***; -0.42***; -0.46***	-0.35***; -0.24***; -0.25***	-0.35***; -0.19**; -0.19**	-0.22***; -0.21***; -0.28***	-0.09ns; -0.13*; -0.08ns	-0.25***; 0.01ns; -0.12ns	-0.16**; -0.16**; -0.12*	0.03ns; -0.52***; -0.53***	-0.12*; -0.11ns; -0.02ns	0ns; 0.1ns; 0.15**	-0.53***; -0.59***; -0.57***	-0.15**; -0.12*; -0.11*	-0.58***; -0.54***; -0.56***	-0.49***; -0.3***; -0.36***	-0.42***; -0.41***; -0.39***	-0.45***; -0.23***; -0.31***	0.25***; 0.29***; 0.37***	-0.59***; -0.37***; -0.54***	-0.35***; -0.36***; -0.37***	0.31***; 0.32***; 0.5***	-0.43***; -0.29***; -0.55***	-0.26***; -0.08ns; -0.17**	0.03ns; 0.1ns; 0.17**	-0.52***; -0.34***; -0.46***	-0.59***; -0.14*; -0.51***	-0.11ns; 0.1ns; 0.01ns	-0.45***; -0.31***; -0.41***	-0.52***; -0.19***; -0.53***	0.35***; 0.42***; 0.53***	-0.5***; -0.29***; -0.41***	-0.47***; -0.03ns; -0.17*	-0.36***; 0.18*; 0.37***	-0.28***; -0.16**; -0.18**	0.23***; 0.36***; 0.34***	0.05ns; 0.1ns; 0.13*	-0.49***; -0.41***; -0.49***	0.54***; 0.64***; 0.61***
[truncated: 18 more columns]

## Sheet: Table_S8
Table_S8	Correlation matrix for 59 traits across 328 species-site combinations, including 246 unique woody species sampled from 16 ecosystems across the continental U.S.A and northern Mexico, against eight climate variables for the mean of species’ native ranges— mean annual precipitation (MAP), mean annual temperature (MAT), mean annual aridity index (MAAI), potential evapotranspiration (PET), growing se…
Traits	e_avg_um2	s_avg_um2	d_sum_sto.mm.2	gmax_sum_mol.m.2.s.1	t_avg_tri.mm.2	SR_unitless	LA_cm2	LMA_g.m.2	LTH_mm	LD_g.cm.3	LDMC_g.g.1	SWC_g.g.1	SWMA_g.m.2	PLAdry_.	PLTHdry_.	PA_LA	PA.Drymass_cm2.g.1	PMA_g.cm.2	WD_g.cm.3	HuberValue_unitless	BarkThicknessStemDiameterRatio	Cmass_mg.g.1	Narea_g.m.2	Nmass_mg.g.1	Parea_g.m.2	Pmass_mg.g.1	Kmass_mg.g.1	Camass_mg.g.1	Mgmass_mg.g.1	Femass_mg.g.1	Bmass_mg.g.1	Mnmass_mg.g.1	Namass_mg.g.1	Znmass_mg.g.1	Cumass_mg.g.1	Momass_mg.g.1	Comass_mg.g.1	Almass_mg.g.1	Asmass_mg.g.1	Cdmass_mg.g.1	Rbmass_mg.g.1	Srmass_mg.g.1	Semass_mg.g.1	Nimass_mg.g.1	Chlarea_SPAD	N_P	C_N	SPAD_Narea	D13C_permil
e_avg_um2	1	0.42	0.5	0.43	0.46	0.48	0.3	0.33	0.36	0.29	0.21	0.22	0.43	0.22	0.09	0.27	0.27	0.26	0.23	0.18	0.34	0.07	0.15	0.27	0.3	0.16	0.12	0.12	0.12	0.09	0.12	0.03	0.18	0.18	0.26	0.15	0.3	0.33	0.23	0.27	0.1	0.16	0.22	0.21	0.2	0.28	0.33	0.25	0.11
s_avg_um2	0.42	1	0.3	0.29	0.15	0.35	0.11	0.29	0.33	0.04	0.03	0.03	0.35	0.15	0.12	0.13	0.12	0.1	0.13	0.16	0.04	0.11	0.3	0.16	0.3	0.1	0.1	0.13	0.1	0.07	0.16	0.16	0.21	0.18	0.11	0.11	0.21	0.05	0.17	0.23	0.11	0.16	0.18	0.19	0.09	0.1	0.18	0.25	0.11
d_sum_sto.mm.2	0.5	0.3	1	0.91	0.39	0.18	0.25	0.12	0.16	0.2	0.25	0.23	0.23	0.22	0.13	0.05	0.06	0.05	0.21	0.15	0.06	0.09	0.12	0.15	0.18	0.17	0.16	0.1	0.09	0.1	0.05	0.19	0.1	0.12	0.17	0.1	0.21	0.2	0.15	0.12	0.07	0.26	0.09	0.11	0.12	0.28	0.14	0.26	0.06
gmax_sum_mol.m.2.s.1	0.43	0.29	0.91	1	0.36	0.16	0.24	0.17	0.12	0.21	0.27	0.23	0.14	0.22	0.13	0.11	0.06	0.08	0.26	0.11	0.07	0.14	0.23	0.12	0.13	0.19	0.14	0.08	0.06	0.08	0.05	0.14	0.04	0.07	0.13	0.1	0.16	0.22	0.12	0.08	0.03	0.25	0.09	0.12	0.15	0.28	0.11	0.24	0.05
t_avg_tri.mm.2	0.46	0.15	0.39	0.36	1	0.19	0.08	0.15	0.16	0.07	0.23	0.08	0.18	0.3	0.1	0.15	0.18	0.05	0.21	0.13	0.09	0.11	0.19	0.4	0.13	0.23	0.24	0.23	0.09	0.42	0.2	0.19	0.22	0.06	0.21	0.29	0.21	0.07	0.26	0.17	0.02	0.24	0.2	0.21	0.13	0.15	0.39	0.14	0.12
SR_unitless	0.48	0.35	0.18	0.16	0.19	1	0.56	0.51	0.64	0.21	0.11	0.16	0.67	0.27	0.12	0.34	0.21	0.42	0.04	0.18	0.17	0.09	0.6	0.15	0.59	0.25	0.26	0.11	0.34	0.31	0.15	0.19	0.43	0.23	0.28	0.21	0.43	0.34	0.37	0.41	0.2	0.22	0.35	0.28	0.31	0.34	0.17	0.43	0.42
LA_cm2	0.3	0.11	0.25	0.24	0.08	0.56	1	0.58	0.6	0.07	0.14	0.16	0.57	0.03	0.18	0.3	0.56	0.57	0.2	0.18	0.14	0.3	0.49	0.38	0.6	0.12	0.11	0.21	0.56	0.24	0.05	0.15	0.45	0.22	0.35	0.08	0.38	0.3	0.2	0.34	0.26	0.14	0.37	0.32	0.29	0.48	0.41	0.47	0.45
LMA_g.m.2	0.33	0.29	0.12	0.17	0.15	0.51	0.58	1	0.86	0.28	0.53	0.49	0.83	0.28	0.28	0.38	0.35	0.55	0.26	0.1	0.41	0.43	0.81	0.67	0.73	0.24	0.42	0.24	0.6	0.13	0.15	0.18	0.3	0.1	0.55	0.18	0.28	0.1	0.05	0.28	0.43	0.06	0.26	0.24	0.57	0.35	0.73	0.54	0.53
LTH_mm	0.36	0.33	0.16	0.12	0.16	0.64	0.6	0.86	1	0.28	0.29	0.21	0.86	0.1	0.13	0.41	0.25	0.57	0.13	0.29	0.34	0.31	0.73	0.53	0.73	0.08	0.2	0.13	0.51	0.06	0.14	0.24	0.36	0.16	0.56	0.07	0.37	0.23	0.19	0.34	0.41	0.2	0.33	0.34	0.59	0.38	0.52	0.58	0.56
LD_g.cm.3	0.29	0.04	0.2	0.21	0.07	0.21	0.07	0.28	0.28	1	0.53	0.48	0.04	0.61	0.15	0.12	0.19	0.03	0.3	0.51	0.06	0.31	0.24	0.25	0.17	0.21	0.31	0.19	0.16	0.21	0.14	0.14	0.06	0.09	0.18	0.18	0.11	0.25	0.2	0.08	0.18	0.22	0.15	0.44	0.05	0.06	0.24	0.07	0.2
LDMC_g.g.1	0.21	0.03	0.25	0.27	0.23	0.11	0.14	0.53	0.29	0.53	1	0.97	0.06	0.43	0.43	0.16	0.43	0.41	0.49	0.1	0.19	0.4	0.29	0.56	0.16	0.46	0.61	0.21	0.29	0.27	0.26	0.15	0.18	0.12	0.31	0.4	0.14	0.09	0.16	0.16	0.26	0.15	0.14	0.19	0.24	0.06	0.57	0.14	0.2
SWC_g.g.1	0.22	0.03	0.23	0.23	0.08	0.16	0.16	0.49	0.21	0.48	0.97	1	0.15	0.48	0.45	0.18	0.45	0.39	0.48	0.07	0.21	0.4	0.23	0.56	0.14	0.47	0.66	0.26	0.3	0.32	0.31	0.16	0.22	0.15	0.35	0.41	0.17	0.13	0.19	0.17	0.3	0.18	0.13	0.17	0.19	0.09	0.58	0.08	0.19
SWMA_g.m.2	0.43	0.35	0.23	0.14	0.18	0.67	0.57	0.83	0.86	0.04	0.06	0.15	1	0.06	0.12	0.43	0.15	0.39	0.03	0.1	0.33	0.29	0.78	0.42	0.78	0.13	0.09	0.14	0.52	0.07	0.15	0.31	0.45	0.18	0.45	0.21	0.37	0.2	0.16	0.39	0.33	0.17	0.36	0.34	0.52	0.42	0.44	0.58	0.48
PLAdry_.	0.22	0.15	0.22	0.22	0.3	0.27	0.03	0.28	0.1	0.61	0.43	0.48	0.06	1	0.21	0.03	0.14	0.03	0.21	0.35	0.08	0.31	0.11	0.36	0.08	0.35	0.47	0.35	0.13	0.42	0.17	0.27	0.18	0.13	0.08	0.43	0.18	0.12	0.31	0.14	0.12	0.35	0.27	0.2	0.06	0.05	0.37	0.12	0.19
PLTHdry_.	0.09	0.12	0.13	0.13	0.1	0.12	0.18	0.28	0.13	0.15	0.43	0.45	0.12	0.21	1	0.15	0.2	0.16	0.07	0.11	0.17	0.14	0.17	0.33	0.19	0.35	0.45	0.41	0.12	0.32	0.43	0.14	0.24	0.22	0.23	0.44	0.34	0.11	0.29	0.32	0.05	0.28	0.22	0.21	0.1	0.08	0.33	0.26	0.1
PA_LA	0.27	0.13	0.05	0.11	0.15	0.34	0.3	0.38	0.41	0.12	0.16	0.18	0.43	0.03	0.15	1	0.97	0.42	0.14	0.22	0.24	0.06	0.38	0.13	0.37	0.2	0.25	0.24	0.14	0.13	0.21	0.29	0.1	0.14	0.11	0.28	0.19	0.16	0.14	0.22	0.19	0.21	0.17	0.09	0.31	0.2	0.17	0.19	0.25
PA.Drymass_cm2.g.1	0.27	0.12	0.06	0.06	0.18	0.21	0.56	0.35	0.25	0.19	0.43	0.45	0.15	0.14	0.2	0.97	1	0.56	0.32	0.29	0.14	0.23	0.21	0.45	0.15	0.31	0.42	0.29	0.22	0.19	0.23	0.12	0.08	0.11	0.26	0.32	0.09	0.1	0.11	0.12	0.12	0.19	0.1	0.06	0.14	0.09	0.46	0.06	0.1
PMA_g.cm.2	0.26	0.1	0.05	0.08	0.05	0.42	0.57	0.55	0.57	0.03	0.41	0.39	0.39	0.03	0.16	0.42	0.56	1	0.3	0.24	0.31	0.25	0.44	0.35	0.46	0.06	0.2	0.16	0.4	0.11	0.15	0.07	0.18	0.2	0.17	0.12	0.34	0.28	0.18	0.21	0.22	0.07	0.19	0.16	0.27	0.22	0.36	0.37	0.31
WD_g.cm.3	0.23	0.13	0.21	0.26	0.21	0.04	0.2	0.26	0.13	0.3	0.49	0.48	0.03	0.21	0.07	0.14	0.32	0.3	1	0.15	0.1	0.07	0.2	0.19	0.16	0.16	0.21	0.07	0.18	0.06	0.07	0.03	0.18	0.03	0.1	0.12	0.07	0.08	0.17	0.04	0.21	0.05	0.22	0.05	0.05	0.05	0.19	0.11	0.14
HuberValue_unitless	0.18	0.16	0.15	0.11	0.13	0.18	0.18	0.1	0.29	0.51	0.1	0.07	0.1	0.35	0.11	0.22	0.29	0.24	0.15	1	0.22	0.09	0.08	0.06	0.11	0.2	0.23	0.2	0.11	0.28	0.15	0.08	0.15	0.2	0.29	0.19	0.3	0.33	0.14	0.19	0.35	0.36	0.18	0.28	0.25	0.22	0.12	0.16	0.46
BarkThicknessStemDiameterRatio	0.34	0.04	0.06	0.07	0.09	0.17	0.14	0.41	0.34	0.06	0.19	0.21	0.33	0.08	0.17	0.24	0.14	0.31	0.1	0.22	1	0.16	0.22	0.24	0.35	0.08	0.15	0.16	0.28	0.11	0.15	0.1	0.12	0.06	0.17	0.03	0.26	0.05	0.12	0.12	0.28	0.13	0.37	0.27	0.16	0.26	0.32	0.21	0.18
Cmass_mg.g.1	0.07	0.11	0.09	0.14	0.11	0.09	0.3	0.43	0.31	0.31	0.4	0.4	0.29	0.31	0.14	0.06	0.23	0.25	0.07	0.09	0.16	1	0.36	0.29	0.28	0.16	0.4	0.53	0.51	0.11	0.17	0.15	0.15	0.1	0.19	0.3	0.11	0.18	0.22	0.18	0.04	0.29	0.38	0.23	0.2	0.08	0.53	0.23	0.04
Narea_g.m.2	0.15	0.3	0.12	0.23	0.19	0.6	0.49	0.81	0.73	0.24	0.29	0.23	0.78	0.11	0.17	0.38	0.21	0.44	0.2	0.08	0.22	0.36	1	0.1	0.81	0.21	0.08	0.1	0.59	0.23	0.2	0.29	0.42	0.28	0.25	0.17	0.46	0.11	0.2	0.47	0.32	0.2	0.4	0.37	0.52	0.25	0.23	0.55	0.62
Nmass_mg.g.1	0.27	0.16	0.15	0.12	0.4	0.15	0.38	0.67	0.53	0.25	0.56	0.56	0.42	0.36	0.33	0.13	0.45	0.35	0.19	0.06	0.24	0.29	0.1	1	0.26	0.52	0.64	0.33	0.35	0.5	0.38	0.1	0.09	0.26	0.62	0.44	0.17	0.12	0.21	0.14	0.39	0.2	0.13	0.18	0.29	0.34	0.98	0.18	0.2
Parea_g.m.2	0.3	0.3	0.18	0.13	0.13	0.59	0.6	0.73	0.73	0.17	0.16	0.14	0.78	0.08	0.19	0.37	0.15	0.46	0.16	0.11	0.35	0.28	0.81	0.26	1	0.55	0.25	0.16	0.68	0.34	0.21	0.43	0.58	0.32	0.18	0.29	0.61	0.19	0.35	0.57	0.38	0.35	0.58	0.52	0.39	0.77	0.31	0.68	0.54
Pmass_mg.g.1	0.16	0.1	0.17	0.19	0.23	0.25	0.12	0.24	0.08	0.21	0.46	0.47	0.13	0.35	0.35	0.2	0.31	0.06	0.16	0.2	0.08	0.16	0.21	0.52	0.55	1	0.81	0.43	0.21	0.63	0.43	0.38	0.51	0.35	0.51	0.6	0.53	0.12	0.44	0.48	0.11	0.48	0.48	0.42	0.26	0.68	0.5	0.44	0.1
Kmass_mg.g.1	0.12	0.1	0.16	0.14	0.24	0.26	0.11	0.42	0.2	0.31	0.61	0.66	0.09	0.47	0.45	0.25	0.42	0.2	0.21	0.23	0.15	0.4	0.08	0.64	0.25	0.81	1	0.57	0.27	0.61	0.52	0.32	0.37	0.34	0.55	0.67	0.41	0.13	0.41	0.36	0.22	0.48	0.29	0.22	0.25	0.33	0.65	0.24	0.07
Camass_mg.g.1	0.12	0.13	0.1	0.08	0.23	0.11	0.21	0.24	0.13	0.19	0.21	0.26	0.14	0.35	0.41	0.24	0.29	0.16	0.07	0.2	0.16	0.53	0.1	0.33	0.16	0.43	0.57	1	0.43	0.43	0.41	0.38	0.21	0.14	0.24	0.62	0.34	0.15	0.51	0.21	0.36	0.74	0.29	0.19	0.09	0.07	0.35	0.19	0.08
Mgmass_mg.g.1	0.12	0.1	0.09	0.06	0.09	0.34	0.56	0.6	0.51	0.16	0.29	0.3	0.52	0.13	0.12	0.14	0.22	0.4	0.18	0.11	0.28	0.51	0.59	0.35	0.68	0.21	0.27	0.43	1	0.24	0.21	0.4	0.32	0.1	0.41	0.15	0.45	0.27	0.09	0.39	0.41	0.1	0.5	0.48	0.21	0.56	0.35	0.69	0.39
Femass_mg.g.1	0.09	0.07	0.1	0.08	0.42	0.31	0.24	0.13	0.06	0.21	0.27	0.32	0.07	0.42	0.32	0.13	0.19	0.11	0.06	0.28	0.11	0.11	0.23	0.5	0.34	0.63	0.61	0.43	0.24	1	0.45	0.31	0.52	0.36	0.32	0.62	0.58	0.26	0.61	0.51	0.16	0.52	0.48	0.43	0.11	0.26	0.38	0.48	0.2
Bmass_mg.g.1	0.12	0.16	0.05	0.05	0.2	0.15	0.05	0.15	0.14	0.14	0.26	0.31	0.15	0.17	0.43	0.21	0.23	0.15	0.07	0.15	0.15	0.17	0.2	0.38	0.21	0.43	0.52	0.41	0.21	0.45	1	0.16	0.4	0.36	0.37	0.52	0.42	0.23	0.38	0.45	0.12	0.28	0.25	0.37	0.15	0.12	0.34	0.17	0.06
Mnmass_mg.g.1	0.03	0.16	0.19	0.14	0.19	0.19	0.15	0.18	0.24	0.14	0.15	0.16	0.31	0.27	0.14	0.29	0.12	0.07	0.03	0.08	0.1	0.15	0.29	0.1	0.43	0.38	0.32	0.38	0.4	0.31	0.16	1	0.38	0.3	0.17	0.52	0.2	0.27	0.19	0.15	0.49	0.34	0.32	0.32	0.12	0.48	0.08	0.46	0.32
Namass_mg.g.1	0.18	0.21	0.1	0.04	0.22	0.43	0.45	0.3	0.36	0.06	0.18	0.22	0.45	0.18	0.24	0.1	0.08	0.18	0.18	0.15	0.12	0.15	0.42	0.09	0.58	0.51	0.37	0.21	0.32	0.52	0.4	0.38	1	0.36	0.13	0.41	0.52	0.31	0.49	0.59	0.32	0.41	0.55	0.53	0.16	0.33	0.06	0.54	0.18
Znmass_mg.g.1	0.18	0.18	0.12	0.07	0.06	0.23	0.22	0.1	0.16	0.09	0.12	0.15	0.18	0.13	0.22	0.14	0.11	0.2	0.03	0.2	0.06	0.1	0.28	0.26	0.32	0.35	0.34	0.14	0.1	0.36	0.36	0.3	0.36	1	0.35	0.24	0.52	0.34	0.34	0.62	0.2	0.28	0.19	0.27	0.07	0.1	0.16	0.23	0.04
Cumass_mg.g.1	0.26	0.11	0.17	0.13	0.21	0.28	0.35	0.55	0.56	0.18	0.31	0.35	0.45	0.08	0.23	0.11	0.26	0.17	0.1	0.29	0.17	0.19	0.25	0.62	0.18	0.51	0.55	0.24	0.41	0.32	0.37	0.17	0.13	0.35	1	0.4	0.15	0.07	0.19	0.15	0.51	0.13	0.15	0.4	0.37	0.22	0.61	0.14	0.29
Momass_mg.g.1	0.15	0.11	0.1	0.1	0.29	0.21	0.08	0.18	0.07	0.18	0.4	0.41	0.21	0.43	0.44	0.28	0.32	0.12	0.12	0.19	0.03	0.3	0.17	0.44	0.29	0.6	0.67	0.62	0.15	0.62	0.52	0.52	0.41	0.24	0.4	1	0.42	0.15	0.47	0.42	0.17	0.5	0.35	0.29	0.07	0.23	0.43	0.25	0.18
Comass_mg.g.1	0.3	0.21	0.21	0.16	0.21	0.43	0.38	0.28	0.37	0.11	0.14	0.17	0.37	0.18	0.34	0.19	0.09	0.34	0.07	0.3	0.26	0.11	0.46	0.17	0.61	0.53	0.41	0.34	0.45	0.58	0.42	0.2	0.52	0.52	0.15	0.42	1	0.41	0.58	0.76	0.27	0.56	0.69	0.71	0.11	0.45	0.08	0.64	0.22
Almass_mg.g.1	0.33	0.05	0.2	0.22	0.07	0.34	0.3	0.1	0.23	0.25	0.09	0.13	0.2	0.12	0.11	0.16	0.1	0.28	0.08	0.33	0.05	0.18	0.11	0.12	0.19	0.12	0.13	0.15	0.27	0.26	0.23	0.27	0.31	0.34	0.07	0.15	0.41	1	0.5	0.32	0.15	0.29	0.41	0.41	0.11	0.1	0.09	0.26	0.17
Asmass_mg.g.1	0.23	0.17	0.15	0.12	0.26	0.37	0.2	0.05	0.19	0.2	0.16	0.19	0.16	0.31	0.29	0.14	0.11	0.18	0.17	0.14	0.12	0.22	0.2	0.21	0.35	0.44	0.41	0.51	0.09	0.61	0.38	0.19	0.49	0.34	0.19	0.47	0.58	0.5	1	0.46	0.32	0.59	0.6	0.41	0.08	0.21	0.17	0.43	0.04
Cdmass_mg.g.1	0.27	0.23	0.12	0.08	0.17	0.41	0.34	0.28	0.34	0.08	0.16	0.17	0.39	0.14	0.32	0.22	0.12	0.21	0.04	0.19	0.12	0.18	0.47	0.14	0.57	0.48	0.36	0.21	0.39	0.51	0.45	0.15	0.59	0.62	0.15	0.42	0.76	0.32	0.46	1	0.2	0.38	0.55	0.59	0.15	0.39	0.06	0.55	0.24
Rbmass_mg.g.1	0.1	0.11	0.07	0.03	0.02	0.2	0.26	0.43	0.41	0.18	0.26	0.3	0.33	0.12	0.05	0.19	0.12	0.22	0.21	0.35	0.28	0.04	0.32	0.39	0.38	0.11	0.22	0.36	0.41	0.16	0.12	0.49	0.32	0.2	0.51	0.17	0.27	0.15	0.32	0.2	1	0.42	0.24	0.37	0.25	0.39	0.3	0.38	0.38
Srmass_mg.g.1	0.16	0.16	0.26	0.25	0.24	0.22	0.14	0.06	0.2	0.22	0.15	0.18	0.17	0.35	0.28	0.21	0.19	0.07	0.05	0.36	0.13	0.29	0.2	0.2	0.35	0.48	0.48	0.74	0.1	0.52	0.28	0.34	0.41	0.28	0.13	0.5	0.56	0.29	0.59	0.38	0.42	1	0.48	0.45	0.14	0.27	0.17	0.42	0.17
Semass_mg.g.1	0.22	0.18	0.09	0.09	0.2	0.35	0.37	0.26	0.33	0.15	0.14	0.13	0.36	0.27	0.22	0.17	0.1	0.19	0.22	0.18	0.37	0.38	0.4	0.13	0.58	0.48	0.29	0.29	0.5	0.48	0.25	0.32	0.55	0.19	0.15	0.35	0.69	0.41	0.6	0.55	0.24	0.48	1	0.83	0.11	0.38	0.19	0.62	0.2
Nimass_mg.g.1	0.21	0.19	0.11	0.12	0.21	0.28	0.32	0.24	0.34	0.44	0.19	0.17	0.34	0.2	0.21	0.09	0.06	0.16	0.05	0.28	0.27	0.23	0.37	0.18	0.52	0.42	0.22	0.19	0.48	0.43	0.37	0.32	0.53	0.27	0.4	0.29	0.71	0.41	0.41	0.59	0.37	0.45	0.83	1	0.25	0.32	0.17	0.61	0.44
Chlarea_SPAD	0.2	0.09	0.12	0.15	0.13	0.31	0.29	0.57	0.59	0.05	0.24	0.19	0.52	0.06	0.1	0.31	0.14	0.27	0.05	0.25	0.16	0.2	0.52	0.29	0.39	0.26	0.25	0.09	0.21	0.11	0.15	0.12	0.16	0.07	0.37	0.07	0.11	0.11	0.08	0.15	0.25	0.14	0.11	0.25	1	0.04	0.4	0.41	0.36
N_P	0.28	0.1	0.28	0.28	0.15	0.34	0.48	0.35	0.38	0.06	0.06	0.09	0.42	0.05	0.08	0.2	0.09	0.22	0.05	0.22	0.26	0.08	0.25	0.34	0.77	0.68	0.33	0.07	0.56	0.26	0.12	0.48	0.33	0.1	0.22	0.23	0.45	0.1	0.21	0.39	0.39	0.27	0.38	0.32	0.04	1	0.29	0.56	0.26
C_N	0.33	0.18	0.14	0.11	0.39	0.17	0.41	0.73	0.52	0.24	0.57	0.58	0.44	0.37	0.33	0.17	0.46	0.36	0.19	0.12	0.32	0.53	0.23	0.98	0.31	0.5	0.65	0.35	0.35	0.38	0.34	0.08	0.06	0.16	0.61	0.43	0.08	0.09	0.17	0.06	0.3	0.17	0.19	0.17	0.4	0.29	1	0.33	0.14
SPAD_Narea	0.25	0.25	0.26	0.24	0.14	0.43	0.47	0.54	0.58	0.07	0.14	0.08	0.58	0.12	0.26	0.19	0.06	0.37	0.11	0.16	0.21	0.23	0.55	0.18	0.68	0.44	0.24	0.19	0.69	0.48	0.17	0.46	0.54	0.23	0.14	0.25	0.64	0.26	0.43	0.55	0.38	0.42	0.62	0.61	0.41	0.56	0.33	1	0.32
D13C_permil	0.11	0.11	0.06	0.05	0.12	0.42	0.45	0.53	0.56	0.2	0.2	0.19	0.48	0.19	0.1	0.25	0.1	0.31	0.14	0.46	0.18	0.04	0.62	0.2	0.54	0.1	0.07	0.08	0.39	0.2	0.06	0.32	0.18	0.04	0.29	0.18	0.22	0.17	0.04	0.24	0.38	0.17	0.2	0.44	0.36	0.26	0.14	0.32	1
TLP_.MPa	0.04	0.1	0.16	0.2	0.09	0.26	0.33	0.55	0.39	0.36	0.62	0.57	0.27	0.28	0.2	0.07	0.35	0.42	0.53	0.12	0.23	0.17	0.44	0.34	0.36	0.17	0.22	0.06	0.32	0.09	0.07	0.11	0.24	0.06	0.33	0.1	0.19	0.11	0.09	0.13	0.42	0.13	0.16	0.26	0.23	0.12	0.37	0.3	0.4
K0.1_mmol.m.2.s.1.MPa.1	0.24	0.21	0.16	0.2	0.25	0.41	0.34	0.44	0.43	0.46	0.47	0.41	0.44	0.32	0.24	0.69	0.55	0.68	0.41	0.42	0.26	0.26	0.52	0.17	0.58	0.31	0.18	0.32	0.35	0.27	0.34	0.35	0.39	0.29	0.2	0.24	0.51	0.19	0.29	0.47	0.19	0.27	0.42	0.39	0.16	0.27	0.14	0.49	0.38
psi_K0.1_80_.Mpa	0.24	0.21	0.1	0.07	0.13	0.41	0.35	0.44	0.43	0.06	0.14	0.11	0.44	0.08	0.24	0.39	0.23	0.39	0.12	0.32	0.26	0.13	0.52	0.27	0.58	0.31	0.17	0.16	0.35	0.27	0.21	0.11	0.39	0.29	0.16	0.23	0.51	0.17	0.29	0.47	0.38	0.27	0.41	0.39	0.16	0.3	0.27	0.49	0.29
Jmax_area_umol.m.2.s.1	0.23	0.17	0.06	0.05	0.24	0.31	0.33	0.3	0.28	0.37	0.08	0.03	0.3	0.48	0.21	0.17	0.18	0.31	0.14	0.34	0.08	0.47	0.4	0.3	0.46	0.33	0.2	0.28	0.26	0.24	0.17	0.19	0.33	0.18	0.17	0.26	0.37	0.09	0.22	0.37	0.18	0.37	0.33	0.33	0.1	0.26	0.34	0.38	0.31
Vcmax_area_umol.m.2.s.1	0.32	0.17	0.3	0.26	0.27	0.34	0.36	0.35	0.34	0.15	0.12	0.08	0.34	0.24	0.13	0.42	0.4	0.68	0.24	0.31	0.13	0.37	0.42	0.38	0.47	0.36	0.13	0.04	0.29	0.19	0.13	0.19	0.28	0.17	0.27	0.19	0.34	0.18	0.19	0.34	0.16	0.13	0.29	0.21	0.21	0.21	0.4	0.37	0.29
gc_mod_mol.m.2.s.1	0.22	0.29	0.06	0.1	0.09	0.45	0.42	0.69	0.59	0.35	0.23	0.21	0.69	0.26	0.19	0.34	0.24	0.4	0.18	0.18	0.28	0.31	0.74	0.3	0.79	0.29	0.07	0.16	0.51	0.09	0.16	0.19	0.51	0.3	0.17	0.11	0.44	0.25	0.25	0.43	0.22	0.23	0.42	0.41	0.38	0.43	0.35	0.51	0.04
gc_gmax	0.56	0.33	0.74	0.76	0.23	0.56	0.48	0.47	0.48	0.15	0.05	0.12	0.53	0.21	0.1	0.23	0.16	0.31	0.15	0.21	0.27	0.19	0.43	0.31	0.64	0.39	0.22	0.21	0.38	0.26	0.16	0.24	0.47	0.26	0.22	0.25	0.5	0.36	0.37	0.4	0.16	0.41	0.5	0.47	0.38	0.52	0.38	0.52	0.08
gmax_Narea_mol.g.1.s.1	0.38	0.16	0.69	0.72	0.26	0.51	0.57	0.57	0.58	0.06	0.02	0.04	0.64	0.08	0.1	0.14	0.09	0.33	0.03	0.12	0.19	0.14	0.63	0.17	0.64	0.23	0.11	0.03	0.49	0.17	0.06	0.34	0.3	0.12	0.3	0.17	0.41	0.11	0.14	0.32	0.29	0.22	0.19	0.15	0.41	0.4	0.19	0.52	0.49
HmaxTRY_m	0.3	0.1	0.15	0.12	0.26	0.21	0.34	0.1	0.15	0.07	0.29	0.32	0.19	0.23	0.21	0.17	0.19	0.21	0.05	0.1	0.37	0.09	0.16	0.26	0.18	0.3	0.34	0.05	0.18	0.41	0.27	0.34	0.52	0.18	0.14	0.36	0.23	0.1	0.21	0.35	0.08	0.23	0.12	0.16	0.02	0.18	0.27	0.38	0.18
SeedMassTRY_mg	0.27	0.12	0.36	0.34	0.03	0.27	0.45	0.13	0.14	0.18	0.25	0.28	0.24	0.14	0.11	0.07	0.06	0.05	0.25	0.15	0.23	0.12	0.11	0.05	0.17	0.2	0.19	0.34	0.19	0.32	0.12	0.2	0.32	0.19	0.05	0.22	0.21	0.18	0.15	0.24	0.09	0.32	0.09	0.11	0.05	0.24	0.11	0.26	0.07
GSAI	0.16	0.16	0.14	0.11	0.15	0.5	0.38	0.3	0.33	0.02	0.11	0.12	0.4	0.2	0.32	0.21	0.12	0.2	0.12	0.21	0.07	0.11	0.46	0.09	0.42	0.27	0.28	0.26	0.19	0.31	0.31	0.22	0.31	0.19	0.16	0.32	0.33	0.16	0.3	0.34	0.21	0.23	0.19	0.12	0.21	0.16	0.08	0.23	0.44
GSPET	0.18	0.13	0.27	0.27	0.22	0.43	0.45	0.29	0.39	0.14	0.06	0.11	0.35	0.25	0.21	0.19	0.15	0.22	0.07	0.57	0.15	0.12	0.4	0.1	0.51	0.43	0.32	0.25	0.48	0.52	0.19	0.33	0.44	0.24	0.17	0.33	0.57	0.16	0.36	0.49	0.36	0.47	0.53	0.45	0.2	0.4	0.04	0.53	0.43
GSppt	0.24	0.15	0.3	0.3	0.19	0.57	0.53	0.34	0.42	0.11	0.11	0.13	0.43	0.31	0.33	0.19	0.12	0.29	0.05	0.53	0.12	0.07	0.52	0.12	0.56	0.44	0.38	0.3	0.45	0.53	0.3	0.35	0.42	0.26	0.21	0.4	0.59	0.22	0.4	0.52	0.36	0.44	0.47	0.36	0.24	0.42	0.07	0.47	0.52
GStavg	0.2	0.08	0.33	0.36	0.14	0.37	0.47	0.24	0.36	0.21	0.02	0.05	0.27	0.27	0.1	0.1	0.07	0.31	0.03	0.58	0.11	0.13	0.3	0.06	0.47	0.39	0.26	0.21	0.52	0.44	0.06	0.23	0.37	0.18	0.17	0.2	0.54	0.18	0.31	0.37	0.28	0.51	0.58	0.48	0.22	0.45	0.05	0.56	0.33
AI_mean	0.13	0.23	0.14	0.08	0.32	0.55	0.45	0.43	0.52	0.16	0.07	0.09	0.49	0.33	0.29	0.28	0.09	0.25	0.24	0.5	0.17	0.16	0.6	0.08	0.62	0.43	0.36	0.44	0.38	0.51	0.33	0.54	0.58	0.2	0.19	0.46	0.51	0.12	0.45	0.5	0.55	0.5	0.48	0.39	0.34	0.32	0.1	0.53	0.62
PET_mean	0.06	0.21	0.08	0.07	0.31	0.52	0.38	0.44	0.52	0.19	0.06	0.1	0.49	0.27	0.24	0.25	0.18	0.2	0.24	0.28	0.12	0.17	0.61	0.02	0.55	0.34	0.32	0.34	0.37	0.4	0.24	0.54	0.59	0.17	0.18	0.36	0.41	0.09	0.36	0.44	0.49	0.44	0.42	0.34	0.33	0.29	0.09	0.54	0.55
MAT_mean	0.18	0.17	0.19	0.25	0.19	0.17	0.07	0.25	0.26	0.06	0.02	0.08	0.3	0.07	0.16	0.17	0.07	0.13	0.24	0.38	0.05	0.22	0.3	0.07	0.2	0.11	0.11	0.18	0.11	0.08	0.16	0.31	0.41	0.15	0.06	0.21	0.08	0.12	0.14	0.17	0.22	0.1	0.02	0.06	0.16	0.14	0.07	0.19	0.17
MAP_mean	0.21	0.21	0.24	0.19	0.27	0.54	0.45	0.36	0.42	0.15	0.11	0.14	0.46	0.35	0.35	0.28	0.13	0.25	0.16	0.53	0.12	0.15	0.59	0.15	0.58	0.49	0.42	0.45	0.37	0.59	0.37	0.5	0.55	0.26	0.17	0.52	0.59	0.11	0.45	0.53	0.53	0.5	0.47	0.37	0.28	0.36	0.13	0.49	0.64
[truncated: 18 more columns]

## Sheet: Table_S9
Table S9	Correlation matrix for 59 traits across 328 species-site combinations, including 246 unique woody species sampled from 16 ecosystems across the continental U.S.A and northern Mexico, against eight climate variables for the sampled sites— mean annual precipitation (MAP), mean annual temperature (MAT), mean annual aridity index (MAAI), potential evapotranspiration (PET), growing season aridity inde…
	e_avg_um2	s_avg_um2	d_sum_sto.mm.2	gmax_sum_mol.m.2.s.1	t_avg_tri.mm.2	SR_unitless	LA_cm2	LMA_g.m.2	LTH_mm	LD_g.cm.3	LDMC_g.g.1	SWC_g.g.1	SWMA_g.m.2	PLAdry_.	PLTHdry_.	PA_LA	PA.Drymass_cm2.g.1	PMA_g.cm.2	WD_g.cm.3	HuberValue_unitless	BarkThicknessStemDiameterRatio	Cmass_mg.g.1	Narea_g.m.2	Nmass_mg.g.1	Parea_g.m.2	Pmass_mg.g.1	Kmass_mg.g.1	Camass_mg.g.1	Mgmass_mg.g.1	Femass_mg.g.1	Bmass_mg.g.1	Mnmass_mg.g.1	Namass_mg.g.1	Znmass_mg.g.1	Cumass_mg.g.1	Momass_mg.g.1	Comass_mg.g.1	Almass_mg.g.1	Asmass_mg.g.1	Cdmass_mg.g.1	Rbmass_mg.g.1	Srmass_mg.g.1	Semass_mg.g.1	Nimass_mg.g.1	Chlarea_SPAD	N_P	C_N	SPAD_Narea	D13C_permil
e_avg_um2	1***; 1***; 1***	0.42***; 0.12*; 0.19**	-0.18***; -0.37***; -0.5***	-0.08ns; -0.35***; -0.43***	-0.13*; -0.26***; -0.46***	0.48***; 0.37***; 0.36***	-0.28***; -0.05ns; -0.3***	0.2***; 0.33***; 0.21***	0.34***; 0.31***; 0.36***	-0.29***; -0.24***; -0.12*	-0.16**; -0.12*; -0.21***	0.22***; 0.13*; 0.2***	0.38***; 0.43***; 0.39***	0.22***; 0.08ns; 0.07ns	0.09ns; 0ns; 0ns	0.27***; 0ns; -0.04ns	0.27***; -0.01ns; -0.05ns	0.26***; 0.16*; -0.03ns	-0.23***; -0.2***; -0.19**	0.13*; 0.14ns; 0.18ns	0.09ns; 0.34***; 0.16**	0.06ns; 0.07ns; 0.01ns	0.14*; 0.15*; 0.07ns	-0.15**; -0.24***; -0.27***	0.3***; 0.23***; 0.22***	0.16**; -0.02ns; 0.03ns	0.12*; 0.01ns; 0ns	0.07ns; -0.09ns; -0.12*	-0.12*; -0.12*; -0.12*	0.09ns; 0.06ns; 0.01ns	0.12*; -0.02ns; -0.01ns	-0.03ns; 0.01ns; 0.03ns	0.18**; 0.03ns; 0.06ns	0.18**; 0ns; 0.1ns	-0.12*; -0.24***; -0.26***	0.15**; 0.12*; 0.05ns	0.3***; 0.08ns; 0.23***	0.33***; 0.06ns; 0.3***	0.23***; 0.06ns; 0.11ns	0.27***; 0.02ns; 0.16**	-0.05ns; -0.1ns; -0.1ns	0.16**; 0.08ns; 0ns	0.22***; 0.09ns; 0.16*	0.21***; 0.03ns; 0.05ns	0.14*; 0.2***; 0.13*	-0.26***; -0.28***; -0.28***	0.2***; 0.33***; 0.25***	0.25***; 0.07ns; 0.1ns	-0.06ns; -0.11ns; -0.07ns
s_avg_um2	0.42***; 0.12*; 0.19**	1***; 1***; 1***	-0.05ns; -0.3***; -0.3***	0.29***; 0.05ns; 0.11ns	0.15**; -0.09ns; -0.03ns	0.35***; 0.19***; 0.13*	-0.11*; -0.07ns; -0.07ns	0.29***; 0.25***; 0.24***	0.33***; 0.12*; 0.22***	-0.04ns; 0ns; 0ns	0.03ns; 0.02ns; 0.01ns	0.03ns; 0ns; 0ns	0.35***; 0.3***; 0.29***	0.15**; 0.07ns; 0.03ns	0.11*; 0.01ns; 0.12ns	0.13*; -0.06ns; 0.09ns	0ns; -0.12ns; -0.1ns	0.1ns; -0.08ns; -0.01ns	0.09ns; 0.13*; 0.13*	-0.04ns; 0.16ns; 0.13ns	0.02ns; -0.04ns; -0.03ns	0.11*; 0.1ns; 0.09ns	0.3***; 0.22***; 0.21***	-0.08ns; -0.16**; -0.13*	0.3***; 0.21***; 0.2***	0.1ns; -0.05ns; -0.04ns	0.1ns; 0.08ns; 0.04ns	0.13*; -0.04ns; 0.06ns	-0.08ns; -0.1ns; -0.1ns	0.07ns; 0.04ns; 0ns	0.11*; 0.16**; 0.11ns	-0.15**; -0.06ns; -0.16**	0.21***; 0.18**; 0.16**	0.18**; 0.04ns; 0.13*	-0.07ns; -0.1ns; -0.11ns	0.11*; 0.03ns; 0.02ns	0.21***; -0.03ns; 0.12*	0.05ns; 0.02ns; -0.01ns	0.17**; 0.07ns; 0.07ns	0.23***; -0.06ns; 0.13*	-0.07ns; -0.1ns; -0.11ns	0.16**; 0.01ns; 0.05ns	0.18**; 0.08ns; 0.03ns	0.19***; -0.04ns; 0.02ns	0.09ns; -0.03ns; -0.07ns	-0.1ns; -0.08ns; -0.05ns	0.18***; 0.17**; 0.14*	0.25***; 0.06ns; 0.12*	-0.08ns; -0.11ns; -0.1ns
d_sum_sto.mm.2	-0.18***; -0.37***; -0.5***	-0.05ns; -0.3***; -0.3***	1***; 1***; 1***	0.89***; 0.91***; 0.91***	0.39***; 0.26***; 0.25***	0.11*; -0.18**; -0.16**	0.16**; 0.21***; 0.25***	0.06ns; -0.12*; -0.04ns	-0.01ns; -0.15**; -0.16**	0.18**; 0.2***; 0.1ns	0.25***; 0.25***; 0.24***	-0.19***; -0.21***; -0.23***	-0.08ns; -0.23***; -0.2***	-0.11*; -0.11ns; -0.22***	-0.05ns; -0.13*; -0.09ns	0ns; -0.02ns; 0.05ns	-0.06ns; -0.01ns; 0ns	-0.02ns; -0.05ns; -0.03ns	0.21***; 0.2***; 0.11ns	-0.1ns; -0.12ns; -0.15ns	0.06ns; -0.01ns; 0.03ns	0.09ns; 0.03ns; 0.05ns	0.12*; -0.02ns; 0.06ns	0.08ns; 0.07ns; 0.15**	-0.02ns; -0.18**; -0.14*	-0.08ns; -0.17**; -0.13*	-0.07ns; -0.16**; -0.1ns	-0.08ns; 0ns; -0.1ns	-0.02ns; 0.09ns; 0.08ns	0ns; -0.1ns; -0.08ns	-0.02ns; -0.05ns; -0.01ns	0.08ns; 0.06ns; 0.19**	-0.04ns; -0.05ns; -0.1ns	-0.09ns; -0.07ns; -0.12*	0.07ns; 0.07ns; 0.17**	-0.02ns; -0.1ns; -0.1ns	-0.11*; -0.08ns; -0.21***	-0.15**; -0.02ns; -0.2***	-0.07ns; -0.1ns; -0.15*	-0.04ns; -0.06ns; -0.12*	-0.01ns; 0.02ns; 0.07ns	-0.14*; -0.24***; -0.26***	-0.06ns; -0.01ns; -0.09ns	-0.04ns; -0.11ns; -0.04ns	-0.05ns; -0.1ns; -0.12*	0.15**; 0.28***; 0.28***	-0.01ns; -0.14*; -0.13*	-0.1ns; -0.26***; -0.25***	-0.01ns; 0.06ns; 0.06ns
gmax_sum_mol.m.2.s.1	-0.08ns; -0.35***; -0.43***	0.29***; 0.05ns; 0.11ns	0.89***; 0.91***; 0.91***	1***; 1***; 1***	0.36***; 0.27***; 0.23***	0.16**; -0.15*; -0.11*	0.14**; 0.15**; 0.24***	0.17**; -0.05ns; 0.04ns	0.1ns; -0.12*; -0.08ns	0.17**; 0.21***; 0.1ns	0.26***; 0.27***; 0.23***	-0.19***; -0.21***; -0.23***	0.05ns; -0.14*; -0.09ns	-0.12*; -0.1ns; -0.22***	-0.02ns; -0.13*; -0.04ns	0.07ns; -0.05ns; 0.11ns	-0.05ns; -0.06ns; -0.03ns	-0.01ns; -0.08ns; -0.04ns	0.24***; 0.26***; 0.16**	-0.11*; -0.07ns; -0.1ns	0.07ns; -0.01ns; 0.01ns	0.14*; 0.09ns; 0.08ns	0.23***; 0.05ns; 0.15*	0.04ns; 0.04ns; 0.12*	0.06ns; -0.13*; -0.07ns	-0.09ns; -0.19**; -0.15*	-0.06ns; -0.14*; -0.08ns	-0.06ns; -0.06ns; -0.08ns	-0.06ns; 0.05ns; 0.05ns	-0.02ns; -0.08ns; -0.08ns	0.05ns; 0ns; 0.05ns	0.04ns; 0.05ns; 0.14*	0.01ns; 0.01ns; -0.04ns	-0.01ns; -0.07ns; -0.06ns	0.02ns; 0.04ns; 0.13*	-0.02ns; -0.1ns; -0.09ns	-0.06ns; -0.1ns; -0.16**	-0.14*; -0.01ns; -0.22***	-0.04ns; -0.07ns; -0.12*	0.03ns; -0.08ns; -0.07ns	-0.02ns; 0.02ns; 0.03ns	-0.12*; -0.25***; -0.25***	0ns; 0.02ns; -0.09ns	0.02ns; -0.12ns; -0.03ns	-0.02ns; -0.14*; -0.15**	0.15**; 0.28***; 0.27***	0.04ns; -0.11ns; -0.09ns	-0.04ns; -0.24***; -0.21***	-0.05ns; 0.03ns; 0.02ns
t_avg_tri.mm.2	-0.13*; -0.26***; -0.46***	0.15**; -0.09ns; -0.03ns	0.39***; 0.26***; 0.25***	0.36***; 0.27***; 0.23***	1***; 1***; 1***	0.19***; -0.05ns; -0.06ns	-0.02ns; -0.08ns; 0.07ns	-0.02ns; -0.01ns; -0.15*	0.01ns; -0.03ns; -0.16**	0.07ns; 0.07ns; -0.03ns	0.05ns; 0.23***; 0.03ns	0.02ns; -0.08ns; 0ns	-0.04ns; -0.06ns; -0.18**	0.3***; 0.09ns; 0.22***	0.1ns; -0.05ns; 0.08ns	-0.15**; 0ns; 0.01ns	-0.18***; -0.02ns; 0.01ns	-0.03ns; -0.04ns; 0.05ns	0.21***; 0.09ns; 0.13*	-0.09ns; 0.13ns; 0.08ns	-0.03ns; 0.02ns; -0.09ns	-0.03ns; 0.04ns; -0.11ns	0.19***; 0.15**; 0.11ns	0.28***; 0.1ns; 0.4***	0.13*; 0.02ns; -0.03ns	0.23***; 0ns; 0.17**	0.24***; 0.01ns; 0.23***	0.23***; 0.01ns; 0.21***	-0.08ns; -0.09ns; -0.05ns	0.42***; 0.13*; 0.38***	0.19***; 0.03ns; 0.2***	-0.18**; -0.07ns; -0.19***	0.22***; -0.02ns; 0.1ns	0.04ns; -0.06ns; -0.04ns	0.18***; -0.04ns; 0.21***	0.29***; 0.1ns; 0.24***	0.21***; 0ns; 0.13*	0ns; -0.05ns; -0.07ns	0.26***; 0.03ns; 0.2***	0.17**; 0.03ns; 0.1ns	-0.02ns; 0ns; 0ns	0.24***; 0.1ns; 0.21***	0.2***; -0.02ns; 0.07ns	0.21***; -0.05ns; 0.08ns	-0.04ns; -0.04ns; -0.13*	0.05ns; 0.07ns; 0.15**	-0.18***; -0.15*; -0.39***	0.14*; 0.04ns; 0.09ns	-0.11ns; -0.12*; -0.1ns
SR_unitless	0.48***; 0.37***; 0.36***	0.35***; 0.19***; 0.13*	0.11*; -0.18**; -0.16**	0.16**; -0.15*; -0.11*	0.19***; -0.05ns; -0.06ns	1***; 1***; 1***	-0.5***; -0.13*; -0.56***	0.49***; 0.51***; 0.5***	0.64***; 0.44***; 0.63***	-0.21***; -0.18**; -0.16**	0ns; -0.08ns; -0.11ns	0.08ns; 0.16**; 0.12*	0.59***; 0.67***; 0.63***	0.27***; 0.13*; 0.09ns	0.12*; -0.05ns; -0.1ns	0.34***; 0.2**; 0.16*	0.21***; 0.16*; -0.03ns	0.42***; 0.04ns; 0.11ns	0.01ns; -0.01ns; -0.04ns	-0.05ns; 0.18ns; 0.14ns	0.05ns; 0.17**; 0.08ns	0.09ns; -0.02ns; -0.03ns	0.52***; 0.6***; 0.55***	-0.1ns; -0.09ns; -0.15**	0.59***; 0.5***; 0.53***	0.25***; 0.12*; 0.14*	0.19***; 0.26***; 0.13*	0.1ns; -0.06ns; -0.11ns	-0.26***; -0.24***; -0.34***	0.31***; 0.18**; 0.24***	0.15**; 0.14*; 0.11ns	-0.14**; -0.15*; -0.19***	0.42***; 0.29***; 0.43***	0.23***; -0.02ns; 0.11ns	-0.15**; -0.21***; -0.28***	0.21***; 0.18**; 0.1ns	0.43***; 0.08ns; 0.34***	0.34***; -0.03ns; 0.24***	0.37***; 0.18**; 0.25***	0.41***; 0.14*; 0.34***	-0.12*; -0.2***; -0.19***	0.22***; 0.05ns; 0.04ns	0.35***; 0.01ns; 0.12ns	0.28***; -0.1ns; -0.2**	0.31***; 0.27***; 0.2***	-0.27***; -0.34***; -0.32***	0.17**; 0.17**; 0.14*	0.43***; 0.23***; 0.34***	-0.36***; -0.42***; -0.42***
LA_cm2	-0.28***; -0.05ns; -0.3***	-0.11*; -0.07ns; -0.07ns	0.16**; 0.21***; 0.25***	0.14**; 0.15**; 0.24***	-0.02ns; -0.08ns; 0.07ns	-0.5***; -0.13*; -0.56***	1***; 1***; 1***	-0.56***; -0.17**; -0.58***	-0.59***; -0.12*; -0.6***	0.07ns; -0.01ns; -0.01ns	-0.11*; 0.04ns; -0.14*	0.16**; -0.06ns; 0.14*	-0.56***; -0.21***; -0.57***	0ns; -0.03ns; 0.03ns	0.03ns; -0.01ns; 0.18**	0.03ns; 0.04ns; 0.3***	0.2***; 0.08ns; 0.56***	-0.54***; -0.13*; -0.57***	-0.12*; 0.2***; -0.16**	0.02ns; -0.18ns; -0.01ns	-0.02ns; -0.09ns; -0.14*	-0.3***; -0.23***; -0.29***	-0.45***; -0.18**; -0.49***	0.35***; 0.06ns; 0.38***	-0.56***; -0.22***; -0.6***	-0.11ns; -0.11*; -0.12*	0.1ns; 0ns; 0.11ns	0.15**; 0.17**; 0.21***	0.49***; 0.22***; 0.56***	-0.2***; -0.13*; -0.24***	0.01ns; -0.05ns; 0.03ns	0.12*; 0.05ns; 0.15**	-0.45***; -0.04ns; -0.43***	-0.22***; -0.06ns; -0.13*	0.28***; 0.16**; 0.35***	-0.01ns; -0.08ns; -0.03ns	-0.38***; -0.04ns; -0.37***	-0.3***; 0.25***; -0.16**	-0.2***; 0.13*; -0.16**	-0.34***; -0.05ns; -0.34***	0.21***; -0.04ns; 0.26***	-0.14*; -0.01ns; -0.12*	-0.3***; 0.37***; 0.16*	-0.32***; 0.09ns; 0.12ns	-0.29***; -0.01ns; -0.14*	0.42***; 0.22***; 0.48***	-0.31***; -0.14*; -0.41***	-0.47***; -0.2***; -0.44***	0.45***; 0.21***; 0.44***
LMA_g.m.2	0.2***; 0.33***; 0.21***	0.29***; 0.25***; 0.24***	0.06ns; -0.12*; -0.04ns	0.17**; -0.05ns; 0.04ns	-0.02ns; -0.01ns; -0.15*	0.49***; 0.51***; 0.5***	-0.56***; -0.17**; -0.58***	1***; 1***; 1***	0.86***; 0.43***; 0.82***	0.28***; 0.28***; 0.2***	0.53***; 0.47***; 0.49***	-0.46***; -0.39***; -0.49***	0.83***; 0.78***; 0.82***	-0.2***; -0.15**; -0.28***	-0.03ns; -0.12*; -0.28***	0.38***; 0.18**; 0.18**	0.03ns; 0.05ns; -0.35***	0.55***; 0.1ns; 0.31***	0.25***; 0.17**; 0.26***	-0.1ns; 0.09ns; 0.02ns	0.26***; 0.41***; 0.3***	0.43***; 0.38***; 0.37***	0.81***; 0.7***; 0.81***	-0.57***; -0.6***; -0.67***	0.72***; 0.65***; 0.73***	-0.11*; -0.2***; -0.24***	-0.32***; -0.31***; -0.42***	-0.11ns; -0.18**; -0.24***	-0.49***; -0.41***; -0.6***	-0.1ns; -0.09ns; -0.13*	-0.1ns; -0.04ns; -0.15**	-0.1ns; -0.13*; -0.18**	0.3***; 0.06ns; 0.27***	0.1ns; -0.08ns; -0.02ns	-0.43***; -0.45***; -0.55***	-0.11*; -0.02ns; -0.18**	0.28***; -0.02ns; 0.22***	0.1ns; -0.08ns; 0.02ns	0.05ns; -0.04ns; -0.02ns	0.28***; -0.01ns; 0.21***	-0.33***; -0.33***; -0.43***	0.06ns; -0.04ns; -0.05ns	0.26***; -0.06ns; -0.16*	0.24***; -0.2**; -0.24***	0.57***; 0.48***; 0.45***	-0.25***; -0.35***; -0.32***	0.65***; 0.73***; 0.69***	0.54***; 0.22***; 0.43***	-0.5***; -0.47***; -0.53***
LTH_mm	0.34***; 0.31***; 0.36***	0.33***; 0.12*; 0.22***	-0.01ns; -0.15**; -0.16**	0.1ns; -0.12*; -0.08ns	0.01ns; -0.03ns; -0.16**	0.64***; 0.44***; 0.63***	-0.59***; -0.12*; -0.6***	0.86***; 0.43***; 0.82***	1***; 1***; 1***	-0.16**; -0.26***; -0.28***	0.29***; -0.01ns; 0.15**	-0.21***; 0.2***; -0.15**	0.86***; 0.57***; 0.84***	0.08ns; 0.1ns; 0.05ns	0.04ns; 0.06ns; -0.13*	0.41***; 0.04ns; 0.17**	0.13*; 0ns; -0.25***	0.57***; 0.03ns; 0.27***	0.13*; 0.03ns; 0.09ns	-0.12*; 0.29**; 0.26**	0.26***; 0.31***; 0.34***	0.31***; -0.1ns; 0.16**	0.73***; 0.3***; 0.68***	-0.45***; -0.27***; -0.53***	0.73***; 0.3***; 0.68***	0.01ns; -0.01ns; -0.08ns	-0.13*; 0.08ns; -0.2***	-0.01ns; 0.04ns; -0.13*	-0.43***; -0.13*; -0.51***	0.06ns; 0.03ns; 0.02ns	-0.09ns; 0.03ns; -0.14*	-0.15**; -0.1ns; -0.24***	0.36***; 0.3***; 0.33***	0.16**; -0.06ns; 0ns	-0.41***; -0.27***; -0.56***	0.03ns; 0.07ns; -0.03ns	0.37***; 0.02ns; 0.29***	0.23***; -0.04ns; 0.12*	0.19***; 0.04ns; 0.09ns	0.34***; -0.02ns; 0.23***	-0.32***; -0.19***; -0.41***	0.2***; 0.15**; 0.07ns	0.33***; -0.02ns; -0.05ns	0.25***; -0.2**; -0.34***	0.59***; 0.17**; 0.42***	-0.29***; -0.26***; -0.38***	0.52***; 0.31***; 0.52***	0.58***; 0.16**; 0.44***	-0.54***; -0.28***; -0.56***
LD_g.cm.3	-0.29***; -0.24***; -0.12*	-0.04ns; 0ns; 0ns	0.18**; 0.2***; 0.1ns	0.17**; 0.21***; 0.1ns	0.07ns; 0.07ns; -0.03ns	-0.21***; -0.18**; -0.16**	0.07ns; -0.01ns; -0.01ns	0.28***; 0.28***; 0.2***	-0.16**; -0.26***; -0.28***	1***; 1***; 1***	0.53***; 0.44***; 0.3***	-0.48***; -0.47***; -0.27***	-0.02ns; -0.02ns; 0.04ns	-0.5***; -0.57***; -0.61***	-0.1ns; -0.15*; -0.09ns	-0.04ns; 0.12ns; 0.08ns	-0.19***; 0.06ns; -0.05ns	-0.02ns; -0.03ns; 0.01ns	0.3***; 0.26***; 0.22***	0.05ns; -0.51***; -0.42***	-0.01ns; -0.05ns; -0.06ns	0.22***; 0.28***; 0.31***	0.22***; 0.24***; 0.18**	-0.19***; -0.25***; -0.11*	0.06ns; 0.17**; 0.12*	-0.16**; -0.21***; -0.08ns	-0.29***; -0.31***; -0.2***	-0.12*; -0.16**; -0.19***	-0.11*; -0.13*; -0.16**	-0.21***; -0.09ns; -0.18**	0ns; 0.09ns; 0.14*	0.03ns; 0.01ns; 0.14*	-0.01ns; -0.06ns; 0ns	-0.09ns; -0.01ns; 0.03ns	-0.02ns; -0.04ns; 0.18**	-0.18***; -0.08ns; -0.15**	-0.11*; -0.09ns; 0.03ns	-0.25***; 0.04ns; -0.04ns	-0.2***; -0.05ns; -0.1ns	-0.02ns; -0.01ns; 0.08ns	-0.05ns; -0.01ns; 0.18**	-0.15**; -0.16**; -0.22***	-0.07ns; -0.05ns; -0.15*	0ns; 0.05ns; 0.44***	-0.02ns; -0.01ns; -0.05ns	0.06ns; 0.02ns; -0.01ns	0.24***; 0.15**; 0.16**	-0.03ns; 0.02ns; 0.07ns	0.06ns; 0.08ns; 0.2***
LDMC_g.g.1	-0.16**; -0.12*; -0.21***	0.03ns; 0.02ns; 0.01ns	0.25***; 0.25***; 0.24***	0.26***; 0.27***; 0.23***	0.05ns; 0.23***; 0.03ns	0ns; -0.08ns; -0.11ns	-0.11*; 0.04ns; -0.14*	0.53***; 0.47***; 0.49***	0.29***; -0.01ns; 0.15**	0.53***; 0.44***; 0.3***	1***; 1***; 1***	-0.92***; -0.9***; -0.97***	0.05ns; -0.06ns; -0.06ns	-0.43***; -0.23***; -0.4***	-0.22***; -0.31***; -0.43***	0.04ns; -0.1ns; -0.16*	-0.18***; -0.16**; -0.43***	0.41***; 0.06ns; 0.32***	0.45***; 0.46***; 0.49***	-0.07ns; 0.04ns; -0.1ns	0.19***; 0.19**; 0.16**	0.39***; 0.4***; 0.4***	0.29***; 0.21***; 0.24***	-0.51***; -0.56***; -0.53***	0.14**; 0.16**; 0.14*	-0.41***; -0.41***; -0.46***	-0.55***; -0.6***; -0.61***	-0.2***; -0.18**; -0.21***	-0.26***; -0.28***; -0.29***	-0.26***; -0.15**; -0.27***	-0.25***; -0.22***; -0.26***	0.13*; 0.01ns; 0.15**	-0.14**; -0.13*; -0.18**	-0.1ns; -0.09ns; -0.12*	-0.31***; -0.3***; -0.3***	-0.34***; -0.26***; -0.4***	-0.04ns; -0.14*; -0.08ns	-0.09ns; -0.01ns; -0.07ns	-0.16**; -0.08ns; -0.15**	-0.07ns; -0.16**; -0.12*	-0.26***; -0.21***; -0.25***	-0.11ns; -0.12*; -0.15**	-0.06ns; 0.07ns; -0.14ns	-0.05ns; -0.19*; -0.15*	0.24***; 0.16**; 0.16**	0.03ns; 0.05ns; 0.06ns	0.57***; 0.5***; 0.56***	0.14*; -0.04ns; 0ns	-0.17**; -0.2***; -0.17**
SWC_g.g.1	0.22***; 0.13*; 0.2***	0.03ns; 0ns; 0ns	-0.19***; -0.21***; -0.23***	-0.19***; -0.21***; -0.23***	0.02ns; -0.08ns; 0ns	0.08ns; 0.16**; 0.12*	0.16**; -0.06ns; 0.14*	-0.46***; -0.39***; -0.49***	-0.21***; 0.2***; -0.15**	-0.48***; -0.47***; -0.27***	-0.92***; -0.9***; -0.97***	1***; 1***; 1***	0.03ns; 0.15**; 0.07ns	0.48***; 0.3***; 0.39***	0.29***; 0.34***; 0.45***	0.01ns; 0.11ns; 0.18**	0.22***; 0.15*; 0.45***	-0.39***; -0.08ns; -0.34***	-0.44***; -0.45***; -0.48***	0.04ns; 0.07ns; 0.07ns	-0.21***; -0.14*; -0.18**	-0.34***; -0.4***; -0.38***	-0.2***; -0.13*; -0.23***	0.55***; 0.56***; 0.55***	-0.06ns; -0.09ns; -0.14*	0.47***; 0.44***; 0.47***	0.61***; 0.66***; 0.62***	0.26***; 0.21***; 0.21***	0.3***; 0.27***; 0.28***	0.32***; 0.17**; 0.28***	0.31***; 0.25***; 0.28***	-0.09ns; -0.01ns; -0.16**	0.22***; 0.18**; 0.19***	0.15**; 0.08ns; 0.12*	0.35***; 0.26***; 0.31***	0.4***; 0.32***; 0.41***	0.1ns; 0.17**; 0.07ns	0.13*; -0.02ns; 0.07ns	0.19***; 0.12*; 0.16**	0.15**; 0.17**; 0.13*	0.3***; 0.17**; 0.26***	0.18**; 0.18**; 0.14*	0.09ns; -0.04ns; 0.13ns	0.09ns; 0.15*; 0.17*	-0.19***; -0.16**; -0.18**	0.01ns; -0.09ns; -0.06ns	-0.5***; -0.46***; -0.58***	-0.06ns; 0.08ns; 0.01ns	0.19***; 0.12*; 0.17**
SWMA_g.m.2	0.38***; 0.43***; 0.39***	0.35***; 0.3***; 0.29***	-0.08ns; -0.23***; -0.2***	0.05ns; -0.14*; -0.09ns	-0.04ns; -0.06ns; -0.18**	0.59***; 0.67***; 0.63***	-0.56***; -0.21***; -0.57***	0.83***; 0.78***; 0.82***	0.86***; 0.57***; 0.84***	-0.02ns; -0.02ns; 0.04ns	0.05ns; -0.06ns; -0.06ns	0.03ns; 0.15**; 0.07ns	1***; 1***; 1***	0.05ns; -0.03ns; -0.06ns	0.12*; 0ns; -0.05ns	0.43***; 0.07ns; 0.3***	0.15**; -0.07ns; -0.15*	0.39***; 0.06ns; 0.11ns	0ns; -0.03ns; -0.02ns	-0.08ns; 0.1ns; 0.07ns	0.2***; 0.33***; 0.24***	0.29***; 0.14*; 0.18***	0.78***; 0.71***; 0.76***	-0.34***; -0.32***; -0.42***	0.78***; 0.67***; 0.76***	0.13*; 0.02ns; 0.02ns	-0.02ns; 0.07ns; -0.09ns	0.01ns; -0.09ns; -0.14*	-0.42***; -0.35***; -0.52***	0.07ns; 0.03ns; 0.02ns	0.03ns; 0.15**; 0ns	-0.2***; -0.19***; -0.31***	0.45***; 0.23***; 0.44***	0.18***; -0.03ns; 0.05ns	-0.31***; -0.33***; -0.45***	0.1ns; 0.21***; 0.06ns	0.37***; 0.1ns; 0.31***	0.2***; -0.08ns; 0.07ns	0.16**; 0.07ns; 0.08ns	0.39***; 0.11*; 0.33***	-0.23***; -0.27***; -0.33***	0.17**; 0.06ns; 0.03ns	0.36***; -0.08ns; -0.11ns	0.34***; -0.16*; -0.19**	0.52***; 0.45***; 0.4***	-0.33***; -0.41***; -0.42***	0.44***; 0.44***; 0.43***	0.58***; 0.28***; 0.49***	-0.45***; -0.43***; -0.48***
PLAdry_.	0.22***; 0.08ns; 0.07ns	0.15**; 0.07ns; 0.03ns	-0.11*; -0.11ns; -0.22***	-0.12*; -0.1ns; -0.22***	0.3***; 0.09ns; 0.22***	0.27***; 0.13*; 0.09ns	0ns; -0.03ns; 0.03ns	-0.2***; -0.15**; -0.28***	0.08ns; 0.1ns; 0.05ns	-0.5***; -0.57***; -0.61***	-0.43***; -0.23***; -0.4***	0.48***; 0.3***; 0.39***	0.05ns; -0.03ns; -0.06ns	1***; 1***; 1***	0.21***; 0.05ns; 0.14*	0.02ns; -0.02ns; -0.03ns	0.11*; 0.02ns; 0.14*	-0.03ns; 0ns; 0ns	-0.21***; -0.15**; -0.2***	-0.1ns; 0.35***; 0.33***	-0.08ns; -0.03ns; -0.06ns	-0.3***; -0.22***; -0.31***	0ns; -0.07ns; -0.11ns	0.36***; 0.23***; 0.34***	0.08ns; -0.06ns; -0.07ns	0.35***; 0.13*; 0.27***	0.47***; 0.28***; 0.43***	0.35***; 0.25***; 0.34***	0.07ns; 0.13*; 0.12*	0.42***; 0.12*; 0.34***	0.17**; 0ns; 0.08ns	-0.27***; -0.12*; -0.27***	0.18**; -0.01ns; 0.05ns	0.13*; -0.03ns; 0.08ns	0.08ns; -0.06ns; 0.02ns	0.43***; 0.18**; 0.35***	0.18***; 0.03ns; 0.08ns	0.12*; -0.02ns; 0.03ns	0.31***; 0.02ns; 0.22***	0.14*; 0.01ns; 0.03ns	-0.04ns; -0.12*; -0.09ns	0.35***; 0.19***; 0.32***	0.21***; 0.09ns; 0.27***	0.08ns; -0.15*; -0.2**	0.06ns; 0.05ns; 0ns	-0.05ns; 0.03ns; -0.01ns	-0.35***; -0.17**; -0.37***	0.12*; -0.05ns; 0.04ns	-0.17**; -0.19***; -0.15*
PLTHdry_.	0.09ns; 0ns; 0ns	0.11*; 0.01ns; 0.12ns	-0.05ns; -0.13*; -0.09ns	-0.02ns; -0.13*; -0.04ns	0.1ns; -0.05ns; 0.08ns	0.12*; -0.05ns; -0.1ns	0.03ns; -0.01ns; 0.18**	-0.03ns; -0.12*; -0.28***	0.04ns; 0.06ns; -0.13*	-0.1ns; -0.15*; -0.09ns	-0.22***; -0.31***; -0.43***	0.29***; 0.34***; 0.45***	0.12*; 0ns; -0.05ns	0.21***; 0.05ns; 0.14*	1***; 1***; 1***	0.15**; 0.06ns; 0.1ns	0.13*; 0.05ns; 0.2**	0.05ns; -0.03ns; -0.16*	0.03ns; -0.04ns; -0.07ns	-0.03ns; -0.11ns; 0.04ns	-0.03ns; -0.12ns; -0.17*	-0.13*; -0.09ns; -0.14*	0.15**; -0.13*; -0.17**	0.28***; 0.28***; 0.33***	0.19***; -0.06ns; -0.12*	0.35***; 0.29***; 0.24***	0.45***; 0.32***; 0.37***	0.41***; 0.08ns; 0.23***	0.08ns; 0.02ns; 0.12ns	0.32***; 0.23***; 0.25***	0.43***; 0.18**; 0.28***	-0.1ns; -0.04ns; -0.14*	0.24***; 0.1ns; 0.12*	0.22***; 0.04ns; 0.06ns	0.23***; 0.16**; 0.14*	0.44***; 0.12*; 0.3***	0.34***; 0.07ns; 0.15*	0.11*; -0.02ns; 0.02ns	0.29***; 0.09ns; 0.17**	0.32***; 0.01ns; 0.15*	-0.05ns; 0.05ns; 0.04ns	0.28***; 0.05ns; 0.11ns	0.22***; 0.08ns; 0.1ns	0.21***; 0.07ns; 0.11ns	0.02ns; -0.1ns; -0.09ns	0ns; -0.08ns; 0.02ns	-0.24***; -0.21***; -0.33***	0.18**; 0.26***; 0.16**	-0.09ns; 0.08ns; 0.1ns
PA_LA	0.27***; 0ns; -0.04ns	0.13*; -0.06ns; 0.09ns	0ns; -0.02ns; 0.05ns	0.07ns; -0.05ns; 0.11ns	-0.15**; 0ns; 0.01ns	0.34***; 0.2**; 0.16*	0.03ns; 0.04ns; 0.3***	0.38***; 0.18**; 0.18**	0.41***; 0.04ns; 0.17**	-0.04ns; 0.12ns; 0.08ns	0.04ns; -0.1ns; -0.16*	0.01ns; 0.11ns; 0.18**	0.43***; 0.07ns; 0.3***	0.02ns; -0.02ns; -0.03ns	0.15**; 0.06ns; 0.1ns	1***; 1***; 1***	0.9***; 0.97***; 0.84***	0.23***; -0.04ns; -0.42***	-0.13*; -0.08ns; -0.14*	0ns; 0.07ns; 0.22*	0.24***; -0.02ns; -0.03ns	0.06ns; -0.05ns; -0.03ns	0.38***; 0.32***; 0.32***	-0.13*; 0.05ns; 0.12ns	0.37***; 0.21***; 0.25***	0.07ns; 0.2**; 0.15*	0.07ns; 0.25***; 0.22***	0.12*; 0.14*; 0.24***	-0.14*; -0.04ns; -0.08ns	0.05ns; 0.09ns; 0.13*	0.04ns; 0.18**; 0.21***	-0.05ns; -0.2**; -0.29***	0.09ns; 0.02ns; 0.1ns	0.14*; 0.02ns; 0.04ns	-0.11*; 0.04ns; 0ns	0.14*; 0.21***; 0.28***	0.19***; 0.11ns; 0.12*	0.06ns; 0.02ns; -0.16*	0.14*; 0.12*; 0.11ns	0.22***; 0ns; 0.22***	-0.13*; -0.19**; -0.12ns	0.12*; 0.21***; 0.17**	0.17**; 0.02ns; 0.01ns	0.09ns; -0.06ns; -0.01ns	0.31***; 0.18**; 0.19**	-0.14**; -0.2**; -0.08ns	0.17**; -0.04ns; -0.11ns	0.19***; 0.1ns; 0.19**	-0.2***; -0.18**; -0.25***
PA.Drymass_cm2.g.1	0.27***; -0.01ns; -0.05ns	0ns; -0.12ns; -0.1ns	-0.06ns; -0.01ns; 0ns	-0.05ns; -0.06ns; -0.03ns	-0.18***; -0.02ns; 0.01ns	0.21***; 0.16*; -0.03ns	0.2***; 0.08ns; 0.56***	0.03ns; 0.05ns; -0.35***	0.13*; 0ns; -0.25***	-0.19***; 0.06ns; -0.05ns	-0.18***; -0.16**; -0.43***	0.22***; 0.15*; 0.45***	0.15**; -0.07ns; -0.15*	0.11*; 0.02ns; 0.14*	0.13*; 0.05ns; 0.2**	0.9***; 0.97***; 0.84***	1***; 1***; 1***	0.09ns; -0.03ns; -0.56***	-0.27***; -0.11ns; -0.32***	0.04ns; 0.08ns; 0.29**	0.14*; -0.04ns; -0.09ns	-0.11ns; -0.1ns; -0.23***	0.09ns; 0.21***; -0.11ns	0.07ns; 0.12ns; 0.45***	0.11*; -0.11ns; -0.15*	0.09ns; 0.31***; 0.25***	0.18**; 0.31***; 0.42***	0.13*; 0.16*; 0.29***	0.06ns; 0.19**; 0.22***	0.06ns; 0.08ns; 0.19**	0.05ns; 0.08ns; 0.23***	0.04ns; -0.11ns; -0.12*	-0.04ns; -0.04ns; -0.08ns	0.11*; 0.01ns; 0.06ns	0.03ns; 0.21***; 0.26***	0.15**; 0.14*; 0.32***	0.09ns; 0.04ns; 0ns	0.08ns; 0.08ns; -0.1ns	0.11*; 0.07ns; 0.1ns	0.12*; 0.01ns; 0.1ns	0.02ns; -0.06ns; 0.12ns	0.07ns; 0.19**; 0.15*	0.03ns; 0.1ns; 0.1ns	-0.04ns; 0.01ns; 0.06ns	0.14*; 0.07ns; -0.04ns	-0.06ns; -0.09ns; 0.08ns	-0.06ns; -0.12ns; -0.46***	-0.04ns; 0.03ns; -0.06ns	-0.02ns; -0.1ns; 0.02ns
PMA_g.cm.2	0.26***; 0.16*; -0.03ns	0.1ns; -0.08ns; -0.01ns	-0.02ns; -0.05ns; -0.03ns	-0.01ns; -0.08ns; -0.04ns	-0.03ns; -0.04ns; 0.05ns	0.42***; 0.04ns; 0.11ns	-0.54***; -0.13*; -0.57***	0.55***; 0.1ns; 0.31***	0.57***; 0.03ns; 0.27***	-0.02ns; -0.03ns; 0.01ns	0.41***; 0.06ns; 0.32***	-0.39***; -0.08ns; -0.34***	0.39***; 0.06ns; 0.11ns	-0.03ns; 0ns; 0ns	0.05ns; -0.03ns; -0.16*	0.23***; -0.04ns; -0.42***	0.09ns; -0.03ns; -0.56***	1***; 1***; 1***	0.27***; -0.01ns; 0.3***	0.05ns; 0.24*; 0.04ns	0.31***; 0.18**; 0.16*	0.25***; 0.05ns; 0.19**	0.44***; 0.01ns; 0.31***	-0.35***; -0.12ns; -0.19**	0.46***; 0.1ns; 0.33***	-0.06ns; 0.05ns; 0.04ns	-0.2***; -0.05ns; -0.2**	-0.12*; -0.09ns; -0.16*	-0.35***; -0.13ns; -0.4***	0.04ns; 0.11ns; 0.09ns	-0.06ns; -0.1ns; -0.15*	0.07ns; 0.03ns; -0.01ns	0.18***; -0.03ns; 0.06ns	0.2***; -0.02ns; 0.07ns	-0.17**; -0.07ns; -0.16*	-0.1ns; -0.04ns; -0.12ns	0.34***; 0ns; 0.3***	0.28***; -0.01ns; 0.1ns	0.18**; 0.01ns; 0.06ns	0.21***; 0.01ns; 0.12ns	-0.22***; -0.11ns; -0.21**	0.05ns; 0ns; 0.07ns	0.19***; 0.03ns; -0.1ns	0.16**; -0.08ns; -0.13ns	0.27***; 0.12ns; 0.22***	-0.22***; -0.17**; -0.21**	0.36***; 0.22***; 0.22***	0.35***; 0.14*; 0.37***	-0.31***; -0.01ns; -0.24***
WD_g.cm.3	-0.23***; -0.2***; -0.19**	0.09ns; 0.13*; 0.13*	0.21***; 0.2***; 0.11ns	0.24***; 0.26***; 0.16**	0.21***; 0.09ns; 0.13*	0.01ns; -0.01ns; -0.04ns	-0.12*; 0.2***; -0.16**	0.25***; 0.17**; 0.26***	0.13*; 0.03ns; 0.09ns	0.3***; 0.26***; 0.22***	0.45***; 0.46***; 0.49***	-0.44***; -0.45***; -0.48***	0ns; -0.03ns; -0.02ns	-0.21***; -0.15**; -0.2***	0.03ns; -0.04ns; -0.07ns	-0.13*; -0.08ns; -0.14*	-0.27***; -0.11ns; -0.32***	0.27***; -0.01ns; 0.3***	1***; 1***; 1***	-0.15**; -0.05ns; -0.15ns	0.1ns; 0.03ns; 0.05ns	0.05ns; 0.04ns; 0.07ns	0.2***; 0.2***; 0.2***	-0.16**; -0.19***; -0.19***	0.12*; 0.16**; 0.13*	-0.11ns; -0.11ns; -0.16**	-0.14*; -0.18**; -0.21***	0.07ns; 0.07ns; 0.01ns	-0.07ns; -0.18**; -0.15**	0.01ns; -0.02ns; -0.06ns	0.07ns; 0.05ns; 0.04ns	-0.02ns; -0.03ns; 0.02ns	0.04ns; 0.18**; 0.07ns	0ns; -0.03ns; -0.02ns	-0.03ns; -0.07ns; -0.1ns	-0.03ns; -0.03ns; -0.12*	0.06ns; 0.04ns; 0.07ns	-0.08ns; -0.03ns; -0.05ns	0.06ns; 0.17**; 0.08ns	-0.04ns; 0.01ns; -0.04ns	-0.2***; -0.19***; -0.21***	0.02ns; -0.04ns; -0.05ns	-0.02ns; 0.22**; 0.01ns	-0.01ns; -0.05ns; -0.01ns	0.01ns; -0.05ns; -0.02ns	0.05ns; 0.03ns; 0.01ns	0.16**; 0.09ns; 0.19***	0.11ns; -0.03ns; 0.05ns	-0.14*; -0.11ns; -0.04ns
HuberValue_unitless	0.13*; 0.14ns; 0.18ns	-0.04ns; 0.16ns; 0.13ns	-0.1ns; -0.12ns; -0.15ns	-0.11*; -0.07ns; -0.1ns	-0.09ns; 0.13ns; 0.08ns	-0.05ns; 0.18ns; 0.14ns	0.02ns; -0.18ns; -0.01ns	-0.1ns; 0.09ns; 0.02ns	-0.12*; 0.29**; 0.26**	0.05ns; -0.51***; -0.42***	-0.07ns; 0.04ns; -0.1ns	0.04ns; 0.07ns; 0.07ns	-0.08ns; 0.1ns; 0.07ns	-0.1ns; 0.35***; 0.33***	-0.03ns; -0.11ns; 0.04ns	0ns; 0.07ns; 0.22*	0.04ns; 0.08ns; 0.29**	0.05ns; 0.24*; 0.04ns	-0.15**; -0.05ns; -0.15ns	1***; 1***; 1***	0.22***; 0.17ns; 0.2*	0.02ns; -0.06ns; -0.09ns	-0.08ns; 0.04ns; 0.01ns	0.06ns; -0.06ns; -0.03ns	0.07ns; 0.11ns; 0.11ns	0.2***; 0.12ns; 0.11ns	0.09ns; 0.1ns; 0.23*	-0.02ns; 0.09ns; 0.2*	-0.1ns; 0.11ns; 0.08ns	0.03ns; 0.19*; 0.28**	0.13*; -0.15ns; -0.03ns	0.04ns; -0.08ns; -0.06ns	0.02ns; -0.1ns; -0.15ns	0.07ns; 0.07ns; 0.2*	0.11*; -0.2*; -0.29**	0.04ns; 0.19*; 0.13ns	0.29***; -0.01ns; 0.3**	0.06ns; 0.33***; 0.1ns	0.06ns; 0.04ns; 0.14ns	0.14*; 0.02ns; 0.19*	0.07ns; -0.23*; -0.35***	0.13*; 0.36***; 0.31***	0.18**; 0.07ns; -0.02ns	0.28***; -0.11ns; -0.16ns	-0.17**; 0.22*; 0.25**	-0.21***; -0.22*; -0.18ns	-0.05ns; 0.12ns; 0.01ns	-0.01ns; 0.16ns; 0.16ns	0.25***; -0.46***; -0.41***
BarkThicknessStemDiameterRatio	0.09ns; 0.34***; 0.16**	0.02ns; -0.04ns; -0.03ns	0.06ns; -0.01ns; 0.03ns	0.07ns; -0.01ns; 0.01ns	-0.03ns; 0.02ns; -0.09ns	0.05ns; 0.17**; 0.08ns	-0.02ns; -0.09ns; -0.14*	0.26***; 0.41***; 0.3***	0.26***; 0.31***; 0.34***	-0.01ns; -0.05ns; -0.06ns	0.19***; 0.19**; 0.16**	-0.21***; -0.14*; -0.18**	0.2***; 0.33***; 0.24***	-0.08ns; -0.03ns; -0.06ns	-0.03ns; -0.12ns; -0.17*	0.24***; -0.02ns; -0.03ns	0.14*; -0.04ns; -0.09ns	0.31***; 0.18**; 0.16*	0.1ns; 0.03ns; 0.05ns	0.22***; 0.17ns; 0.2*	1***; 1***; 1***	0.16**; 0.16**; 0.13*	0.21***; 0.22***; 0.21***	-0.19***; -0.24***; -0.24***	0.3***; 0.35***; 0.29***	0.08ns; 0.03ns; 0.01ns	-0.06ns; -0.11ns; -0.15*	0.03ns; -0.1ns; -0.16**	-0.28***; -0.22***; -0.28***	-0.02ns; -0.06ns; -0.11ns	-0.11ns; -0.07ns; -0.15*	-0.08ns; -0.1ns; -0.04ns	0.12*; 0.09ns; 0ns	0ns; -0.06ns; -0.04ns	-0.08ns; -0.13*; -0.17**	-0.03ns; 0.03ns; -0.03ns	0.26***; 0.02ns; 0.14*	-0.01ns; 0.02ns; 0.05ns	0.12*; 0.04ns; 0.01ns	0.12*; 0.08ns; 0.08ns	-0.28***; -0.15*; -0.14*	0.13*; -0.04ns; -0.1ns	0.37***; 0.01ns; 0.15*	0.27***; -0.16*; -0.2**	0ns; 0.16*; 0.08ns	-0.23***; -0.26***; -0.22***	0.24***; 0.32***; 0.24***	0.21***; 0.14*; 0.09ns	-0.05ns; -0.18**; -0.12ns
Cmass_mg.g.1	0.06ns; 0.07ns; 0.01ns	0.11*; 0.1ns; 0.09ns	0.09ns; 0.03ns; 0.05ns	0.14*; 0.09ns; 0.08ns	-0.03ns; 0.04ns; -0.11ns	0.09ns; -0.02ns; -0.03ns	-0.3***; -0.23***; -0.29***	0.43***; 0.38***; 0.37***	0.31***; -0.1ns; 0.16**	0.22***; 0.28***; 0.31***	0.39***; 0.4***; 0.4***	-0.34***; -0.4***; -0.38***	0.29***; 0.14*; 0.18***	-0.3***; -0.22***; -0.31***	-0.13*; -0.09ns; -0.14*	0.06ns; -0.05ns; -0.03ns	-0.11ns; -0.1ns; -0.23***	0.25***; 0.05ns; 0.19**	0.05ns; 0.04ns; 0.07ns	0.02ns; -0.06ns; -0.09ns	0.16**; 0.16**; 0.13*	1***; 1***; 1***	0.36***; 0.21***; 0.27***	-0.23***; -0.25***; -0.29***	0.28***; 0.25***; 0.25***	-0.16**; -0.09ns; -0.14*	-0.36***; -0.38***; -0.4***	-0.39***; -0.53***; -0.51***	-0.44***; -0.46***; -0.51***	-0.08ns; -0.09ns; -0.11ns	-0.14**; -0.13*; -0.17**	0.14*; 0.05ns; 0.15**	0.06ns; -0.15*; -0.03ns	0.1ns; 0.04ns; 0.09ns	-0.19***; -0.18**; -0.17**	-0.26***; -0.13*; -0.3***	0.11*; -0.1ns; 0.06ns	0.03ns; -0.18**; -0.1ns	-0.15**; -0.18**; -0.22***	0.18***; -0.05ns; 0.13*	0.04ns; 0.03ns; 0.03ns	-0.22***; -0.29***; -0.29***	0.13*; -0.18*; -0.38***	0.23***; -0.11ns; 0.01ns	0.2***; 0.13*; 0.12*	-0.04ns; -0.04ns; -0.08ns	0.53***; 0.44***; 0.44***	0.23***; 0.1ns; 0.15*	-0.03ns; -0.04ns; -0.02ns
Narea_g.m.2	0.14*; 0.15*; 0.07ns	0.3***; 0.22***; 0.21***	0.12*; -0.02ns; 0.06ns	0.23***; 0.05ns; 0.15*	0.19***; 0.15**; 0.11ns	0.52***; 0.6***; 0.55***	-0.45***; -0.18**; -0.49***	0.81***; 0.7***; 0.81***	0.73***; 0.3***; 0.68***	0.22***; 0.24***; 0.18**	0.29***; 0.21***; 0.24***	-0.2***; -0.13*; -0.23***	0.78***; 0.71***; 0.76***	0ns; -0.07ns; -0.11ns	0.15**; -0.13*; -0.17**	0.38***; 0.32***; 0.32***	0.09ns; 0.21***; -0.11ns	0.44***; 0.01ns; 0.31***	0.2***; 0.2***; 0.2***	-0.08ns; 0.04ns; 0.01ns	0.21***; 0.22***; 0.21***	0.36***; 0.21***; 0.27***	1***; 1***; 1***	-0.04ns; -0.03ns; -0.1ns	0.81***; 0.7***; 0.79***	0.21***; 0.08ns; 0.09ns	0.03ns; 0.08ns; -0.06ns	0.08ns; -0.07ns; -0.1ns	-0.41***; -0.44***; -0.59***	0.23***; 0.09ns; 0.14*	0.13*; 0.2***; 0.06ns	-0.11*; -0.26***; -0.29***	0.42***; 0.14*; 0.34***	0.28***; 0.02ns; 0.13*	-0.12*; -0.19***; -0.25***	0.17**; 0.17**; 0.09ns	0.46***; 0.12*; 0.38***	0.11ns; -0.11*; -0.07ns	0.2***; 0.09ns; 0.09ns	0.47***; 0.06ns; 0.37***	-0.16**; -0.28***; -0.32***	0.2***; 0.06ns; 0.04ns	0.4***; -0.07ns; -0.14ns	0.37***; -0.22**; -0.21**	0.52***; 0.38***; 0.38***	-0.11*; -0.25***; -0.22***	0.23***; 0.12*; 0.14*	0.55***; 0.28***; 0.47***	-0.53***; -0.61***; -0.62***
Nmass_mg.g.1	-0.15**; -0.24***; -0.27***	-0.08ns; -0.16**; -0.13*	0.08ns; 0.07ns; 0.15**	0.04ns; 0.04ns; 0.12*	0.28***; 0.1ns; 0.4***	-0.1ns; -0.09ns; -0.15**	0.35***; 0.06ns; 0.38***	-0.57***; -0.6***; -0.67***	-0.45***; -0.27***; -0.53***	-0.19***; -0.25***; -0.11*	-0.51***; -0.56***; -0.53***	0.55***; 0.56***; 0.55***	-0.34***; -0.32***; -0.42***	0.36***; 0.23***; 0.34***	0.28***; 0.28***; 0.33***	-0.13*; 0.05ns; 0.12ns	0.07ns; 0.12ns; 0.45***	-0.35***; -0.12ns; -0.19**	-0.16**; -0.19***; -0.19***	0.06ns; -0.06ns; -0.03ns	-0.19***; -0.24***; -0.24***	-0.23***; -0.25***; -0.29***	-0.04ns; -0.03ns; -0.1ns	1***; 1***; 1***	-0.12*; -0.19***; -0.26***	0.51***; 0.52***; 0.51***	0.64***; 0.56***; 0.62***	0.33***; 0.16**; 0.28***	0.35***; 0.17**; 0.28***	0.5***; 0.19***; 0.39***	0.38***; 0.2***; 0.33***	0.1ns; -0.03ns; -0.06ns	0.09ns; -0.02ns; -0.03ns	0.26***; 0.18**; 0.19***	0.61***; 0.5***; 0.62***	0.44***; 0.17**; 0.4***	0.14**; 0.17**; 0.08ns	0ns; -0.01ns; -0.12*	0.21***; 0.11ns; 0.15**	0.14*; 0.09ns; 0.09ns	0.39***; 0.24***; 0.33***	0.2***; 0.07ns; 0.13*	0.06ns; 0.02ns; 0.13ns	0.05ns; 0.08ns; 0.18*	-0.17**; -0.25***; -0.29***	0.34***; 0.22***; 0.27***	-0.82***; -0.85***; -0.98***	-0.18***; -0.01ns; -0.13*	0.2***; 0.08ns; 0.12*
Parea_g.m.2	0.3***; 0.23***; 0.22***	0.3***; 0.21***; 0.2***	-0.02ns; -0.18**; -0.14*	0.06ns; -0.13*; -0.07ns	0.13*; 0.02ns; -0.03ns	0.59***; 0.5***; 0.53***	-0.56***; -0.22***; -0.6***	0.72***; 0.65***; 0.73***	0.73***; 0.3***; 0.68***	0.06ns; 0.17**; 0.12*	0.14**; 0.16**; 0.14*	-0.06ns; -0.09ns; -0.14*	0.78***; 0.67***; 0.76***	0.08ns; -0.06ns; -0.07ns	0.19***; -0.06ns; -0.12*	0.37***; 0.21***; 0.25***	0.11*; -0.11ns; -0.15*	0.46***; 0.1ns; 0.33***	0.12*; 0.16**; 0.13*	0.07ns; 0.11ns; 0.11ns	0.3***; 0.35***; 0.29***	0.28***; 0.25***; 0.25***	0.81***; 0.7***; 0.79***	-0.12*; -0.19***; -0.26***	1***; 1***; 1***	0.55***; 0.48***; 0.49***	0.25***; 0.23***; 0.16**	0.16**; -0.04ns; -0.04ns	-0.45***; -0.45***; -0.68***	0.34***; 0.15*; 0.26***	0.19***; 0.21***; 0.1ns	-0.21***; -0.28***; -0.43***	0.58***; 0.11ns; 0.44***	0.32***; 0.05ns; 0.15**	-0.04ns; -0.02ns; -0.18**	0.29***; 0.29***; 0.2***	0.61***; 0.08ns; 0.53***	0.19***; -0.1ns; -0.01ns	0.35***; 0.13*; 0.2***	0.57***; 0.2***; 0.48***	-0.18***; -0.28***; -0.38***	0.35***; 0.13*; 0.2***	0.58***; -0.08ns; -0.07ns	0.52***; -0.23**; -0.27***	0.39***; 0.2***; 0.23***	-0.51***; -0.69***; -0.77***	0.28***; 0.31***; 0.29***	0.68***; 0.49***; 0.66***	-0.48***; -0.48***; -0.54***
Pmass_mg.g.1	0.16**; -0.02ns; 0.03ns	0.1ns; -0.05ns; -0.04ns	-0.08ns; -0.17**; -0.13*	-0.09ns; -0.19**; -0.15*	0.23***; 0ns; 0.17**	0.25***; 0.12*; 0.14*	-0.11ns; -0.11*; -0.12*	-0.11*; -0.2***; -0.24***	0.01ns; -0.01ns; -0.08ns	-0.16**; -0.21***; -0.08ns	-0.41***; -0.41***; -0.46***	0.47***; 0.44***; 0.47***	0.13*; 0.02ns; 0.02ns	0.35***; 0.13*; 0.27***	0.35***; 0.29***; 0.24***	0.07ns; 0.2**; 0.15*	0.09ns; 0.31***; 0.25***	-0.06ns; 0.05ns; 0.04ns	-0.11ns; -0.11ns; -0.16**	0.2***; 0.12ns; 0.11ns	0.08ns; 0.03ns; 0.01ns	-0.16**; -0.09ns; -0.14*	0.21***; 0.08ns; 0.09ns	0.51***; 0.52***; 0.51***	0.55***; 0.48***; 0.49***	1***; 1***; 1***	0.81***; 0.64***; 0.76***	0.43***; 0.08ns; 0.25***	-0.01ns; -0.15**; -0.21***	0.63***; 0.3***; 0.53***	0.43***; 0.21***; 0.33***	-0.2***; -0.19***; -0.38***	0.51***; 0.04ns; 0.28***	0.35***; 0.16**; 0.23***	0.47***; 0.51***; 0.45***	0.6***; 0.32***; 0.52***	0.53***; 0.14*; 0.46***	0.12*; -0.08ns; -0.05ns	0.44***; 0.13*; 0.31***	0.48***; 0.24***; 0.41***	0.11ns; 0.06ns; 0.01ns	0.48***; 0.22***; 0.35***	0.48***; -0.04ns; 0.17*	0.42***; -0.06ns; 0.02ns	-0.1ns; -0.21***; -0.26***	-0.41***; -0.59***; -0.68***	-0.38***; -0.35***; -0.5***	0.3***; 0.44***; 0.38***	-0.1ns; -0.07ns; -0.1ns
Kmass_mg.g.1	0.12*; 0.01ns; 0ns	0.1ns; 0.08ns; 0.04ns	-0.07ns; -0.16**; -0.1ns	-0.06ns; -0.14*; -0.08ns	0.24***; 0.01ns; 0.23***	0.19***; 0.26***; 0.13*	0.1ns; 0ns; 0.11ns	-0.32***; -0.31***; -0.42***	-0.13*; 0.08ns; -0.2***	-0.29***; -0.31***; -0.2***	-0.55***; -0.6***; -0.61***	0.61***; 0.66***; 0.62***	-0.02ns; 0.07ns; -0.09ns	0.47***; 0.28***; 0.43***	0.45***; 0.32***; 0.37***	0.07ns; 0.25***; 0.22***	0.18**; 0.31***; 0.42***	-0.2***; -0.05ns; -0.2**	-0.14*; -0.18**; -0.21***	0.09ns; 0.1ns; 0.23*	-0.06ns; -0.11ns; -0.15*	-0.36***; -0.38***; -0.4***	0.03ns; 0.08ns; -0.06ns	0.64***; 0.56***; 0.62***	0.25***; 0.23***; 0.16**	0.81***; 0.64***; 0.76***	1***; 1***; 1***	0.57***; 0.29***; 0.47***	0.27***; 0.08ns; 0.11ns	0.61***; 0.36***; 0.53***	0.52***; 0.38***; 0.45***	-0.13*; -0.11ns; -0.32***	0.37***; 0.11*; 0.21***	0.34***; 0.12*; 0.22***	0.55***; 0.41***; 0.47***	0.67***; 0.45***; 0.61***	0.41***; 0.14*; 0.33***	0.13*; -0.04ns; -0.03ns	0.41***; 0.2***; 0.3***	0.36***; 0.19***; 0.3***	0.22***; 0.04ns; 0.09ns	0.48***; 0.26***; 0.39***	0.29***; 0.07ns; 0.25***	0.22***; 0.01ns; 0.1ns	-0.17**; -0.16**; -0.25***	-0.12*; -0.33***; -0.31***	-0.53***; -0.51***; -0.65***	0.1ns; 0.24***; 0.14*	0.01ns; -0.07ns; -0.04ns
Camass_mg.g.1	0.07ns; -0.09ns; -0.12*	0.13*; -0.04ns; 0.06ns	-0.08ns; 0ns; -0.1ns	-0.06ns; -0.06ns; -0.08ns	0.23***; 0.01ns; 0.21***	0.1ns; -0.06ns; -0.11ns	0.15**; 0.17**; 0.21***	-0.11ns; -0.18**; -0.24***	-0.01ns; 0.04ns; -0.13*	-0.12*; -0.16**; -0.19***	-0.2***; -0.18**; -0.21***	0.26***; 0.21***; 0.21***	0.01ns; -0.09ns; -0.14*	0.35***; 0.25***; 0.34***	0.41***; 0.08ns; 0.23***	0.12*; 0.14*; 0.24***	0.13*; 0.16*; 0.29***	-0.12*; -0.09ns; -0.16*	0.07ns; 0.07ns; 0.01ns	-0.02ns; 0.09ns; 0.2*	0.03ns; -0.1ns; -0.16**	-0.39***; -0.53***; -0.51***	0.08ns; -0.07ns; -0.1ns	0.33***; 0.16**; 0.28***	0.16**; -0.04ns; -0.04ns	0.43***; 0.08ns; 0.25***	0.57***; 0.29***; 0.47***	1***; 1***; 1***	0.31***; 0.43***; 0.26***	0.43***; 0.08ns; 0.28***	0.41***; 0.11*; 0.28***	-0.19***; -0.18**; -0.38***	0.21***; 0.01ns; 0.01ns	0.14*; -0.06ns; -0.03ns	0.24***; 0.09ns; 0.13*	0.62***; 0.17**; 0.49***	0.34***; 0.02ns; 0.18**	0.15**; 0.11ns; 0.04ns	0.51***; 0.15**; 0.37***	0.21***; 0ns; 0.04ns	-0.17**; -0.29***; -0.36***	0.74***; 0.48***; 0.68***	0.29***; 0.06ns; 0.28***	0.19***; 0.02ns; 0.01ns	0.04ns; -0.07ns; -0.09ns	0.07ns; -0.01ns; -0.05ns	-0.26***; -0.24***; -0.35***	0.19***; 0.03ns; 0.08ns	-0.04ns; -0.08ns; -0.08ns
Mgmass_mg.g.1	-0.12*; -0.12*; -0.12*	-0.08ns; -0.1ns; -0.1ns	-0.02ns; 0.09ns; 0.08ns	-0.06ns; 0.05ns; 0.05ns	-0.08ns; -0.09ns; -0.05ns	-0.26***; -0.24***; -0.34***	0.49***; 0.22***; 0.56***	-0.49***; -0.41***; -0.6***	-0.43***; -0.13*; -0.51***	-0.11*; -0.13*; -0.16**	-0.26***; -0.28***; -0.29***	0.3***; 0.27***; 0.28***	-0.42***; -0.35***; -0.52***	0.07ns; 0.13*; 0.12*	0.08ns; 0.02ns; 0.12ns	-0.14*; -0.04ns; -0.08ns	0.06ns; 0.19**; 0.22***	-0.35***; -0.13ns; -0.4***	-0.07ns; -0.18**; -0.15**	-0.1ns; 0.11ns; 0.08ns	-0.28***; -0.22***; -0.28***	-0.44***; -0.46***; -0.51***	-0.41***; -0.44***; -0.59***	0.35***; 0.17**; 0.28***	-0.45***; -0.45***; -0.68***	-0.01ns; -0.15**; -0.21***	0.27***; 0.08ns; 0.11ns	0.31***; 0.43***; 0.26***	1***; 1***; 1***	-0.05ns; -0.15**; -0.24***	0.21***; 0.02ns; 0.03ns	0.4***; 0.21***; 0.29***	-0.21***; -0.06ns; -0.32***	0.08ns; 0.1ns; -0.01ns	0.41***; 0.14*; 0.26***	0.15**; -0.04ns; 0ns	-0.27***; 0ns; -0.45***	0.1ns; 0.27***; 0.04ns	0.04ns; 0.05ns; -0.09ns	-0.22***; -0.06ns; -0.39***	0.41***; 0.14*; 0.3***	0.03ns; 0.02ns; -0.1ns	-0.5***; 0.09ns; 0.22**	-0.48***; 0.34***; 0.33***	-0.21***; -0.18**; -0.18**	0.56***; 0.32***; 0.48***	-0.29***; -0.28***; -0.35***	-0.48***; -0.45***; -0.69***	0.39***; 0.28***; 0.34***
Femass_mg.g.1	0.09ns; 0.06ns; 0.01ns	0.07ns; 0.04ns; 0ns	0ns; -0.1ns; -0.08ns	-0.02ns; -0.08ns; -0.08ns	0.42***; 0.13*; 0.38***	0.31***; 0.18**; 0.24***	-0.2***; -0.13*; -0.24***	-0.1ns; -0.09ns; -0.13*	0.06ns; 0.03ns; 0.02ns	-0.21***; -0.09ns; -0.18**	-0.26***; -0.15**; -0.27***	0.32***; 0.17**; 0.28***	0.07ns; 0.03ns; 0.02ns	0.42***; 0.12*; 0.34***	0.32***; 0.23***; 0.25***	0.05ns; 0.09ns; 0.13*	0.06ns; 0.08ns; 0.19**	0.04ns; 0.11ns; 0.09ns	0.01ns; -0.02ns; -0.06ns	0.03ns; 0.19*; 0.28**	-0.02ns; -0.06ns; -0.11ns	-0.08ns; -0.09ns; -0.11ns	0.23***; 0.09ns; 0.14*	0.5***; 0.19***; 0.39***	0.34***; 0.15*; 0.26***	0.63***; 0.3***; 0.53***	0.61***; 0.36***; 0.53***	0.43***; 0.08ns; 0.28***	-0.05ns; -0.15**; -0.24***	1***; 1***; 1***	0.45***; 0.15**; 0.35***	-0.12*; -0.15*; -0.31***	0.52***; 0.17**; 0.46***	0.36***; 0.07ns; 0.22***	0.32***; 0.17**; 0.2***	0.62***; 0.17**; 0.51***	0.58***; 0.17**; 0.52***	0.26***; -0.01ns; 0.16**	0.61***; 0.42***; 0.56***	0.51***; 0.18**; 0.46***	0.01ns; -0.11*; -0.16**	0.52***; 0.19***; 0.41***	0.48***; 0ns; 0.12ns	0.43***; -0.06ns; -0.03ns	0.02ns; -0.09ns; -0.11ns	-0.04ns; -0.22***; -0.26***	-0.35***; -0.16**; -0.38***	0.36***; 0.48***; 0.46***	-0.2***; -0.07ns; -0.16**
Bmass_mg.g.1	0.12*; -0.02ns; -0.01ns	0.11*; 0.16**; 0.11ns	-0.02ns; -0.05ns; -0.01ns	0.05ns; 0ns; 0.05ns	0.19***; 0.03ns; 0.2***	0.15**; 0.14*; 0.11ns	0.01ns; -0.05ns; 0.03ns	-0.1ns; -0.04ns; -0.15**	-0.09ns; 0.03ns; -0.14*	0ns; 0.09ns; 0.14*	-0.25***; -0.22***; -0.26***	0.31***; 0.25***; 0.28***	0.03ns; 0.15**; 0ns	0.17**; 0ns; 0.08ns	0.43***; 0.18**; 0.28***	0.04ns; 0.18**; 0.21***	0.05ns; 0.08ns; 0.23***	-0.06ns; -0.1ns; -0.15*	0.07ns; 0.05ns; 0.04ns	0.13*; -0.15ns; -0.03ns	-0.11ns; -0.07ns; -0.15*	-0.14**; -0.13*; -0.17**	0.13*; 0.2***; 0.06ns	0.38***; 0.2***; 0.33***	0.19***; 0.21***; 0.1ns	0.43***; 0.21***; 0.33***	0.52***; 0.38***; 0.45***	0.41***; 0.11*; 0.28***	0.21***; 0.02ns; 0.03ns	0.45***; 0.15**; 0.35***	1***; 1***; 1***	0.02ns; -0.09ns; -0.16**	0.4***; 0.26***; 0.32***	0.36***; 0.13*; 0.26***	0.37***; 0.1ns; 0.24***	0.52***; 0.29***; 0.45***	0.42***; 0.2***; 0.34***	0.23***; 0.05ns; 0.08ns	0.38***; 0.26***; 0.28***	0.45***; 0.13*; 0.39***	0.12*; -0.11ns; -0.03ns	0.28***; 0.08ns; 0.17**	0.25***; -0.02ns; 0.1ns	0.32***; 0.26***; 0.37***	-0.08ns; -0.08ns; -0.15*	0.09ns; -0.12*; -0.09ns	-0.26***; -0.22***; -0.34***	0.16**; 0.17**; 0.16**	0.06ns; -0.03ns; 0.01ns
Mnmass_mg.g.1	-0.03ns; 0.01ns; 0.03ns	-0.15**; -0.06ns; -0.16**	0.08ns; 0.06ns; 0.19**	0.04ns; 0.05ns; 0.14*	-0.18**; -0.07ns; -0.19***	-0.14**; -0.15*; -0.19***	0.12*; 0.05ns; 0.15**	-0.1ns; -0.13*; -0.18**	-0.15**; -0.1ns; -0.24***	0.03ns; 0.01ns; 0.14*	0.13*; 0.01ns; 0.15**	-0.09ns; -0.01ns; -0.16**	-0.2***; -0.19***; -0.31***	-0.27***; -0.12*; -0.27***	-0.1ns; -0.04ns; -0.14*	-0.05ns; -0.2**; -0.29***	0.04ns; -0.11ns; -0.12*	0.07ns; 0.03ns; -0.01ns	-0.02ns; -0.03ns; 0.02ns	0.04ns; -0.08ns; -0.06ns	-0.08ns; -0.1ns; -0.04ns	0.14*; 0.05ns; 0.15**	-0.11*; -0.26***; -0.29***	0.1ns; -0.03ns; -0.06ns	-0.21***; -0.28***; -0.43***	-0.2***; -0.19***; -0.38***	-0.13*; -0.11ns; -0.32***	-0.19***; -0.18**; -0.38***	0.4***; 0.21***; 0.29***	-0.12*; -0.15*; -0.31***	0.02ns; -0.09ns; -0.16**	1***; 1***; 1***	-0.21***; -0.09ns; -0.38***	0.3***; 0.17**; 0.19***	0.17**; -0.02ns; 0ns	-0.28***; -0.19***; -0.52***	-0.01ns; -0.05ns; -0.2***	0.27***; 0.08ns; 0.19***	-0.07ns; -0.05ns; -0.19***	0.03ns; -0.05ns; -0.15*	0.49***; 0.31***; 0.4***	-0.15**; -0.19***; -0.34***	-0.32***; 0.11ns; -0.1ns	-0.18***; 0.15*; 0.32***	-0.07ns; -0.12*; -0.1ns	0.48***; 0.22***; 0.37***	0.06ns; 0.02ns; 0.08ns	-0.26***; -0.3***; -0.46***	0.3***; 0.27***; 0.32***
Namass_mg.g.1	0.18**; 0.03ns; 0.06ns	0.21***; 0.18**; 0.16**	-0.04ns; -0.05ns; -0.1ns	0.01ns; 0.01ns; -0.04ns	0.22***; -0.02ns; 0.1ns	0.42***; 0.29***; 0.43***	-0.45***; -0.04ns; -0.43***	0.3***; 0.06ns; 0.27***	0.36***; 0.3***; 0.33***	-0.01ns; -0.06ns; 0ns	-0.14**; -0.13*; -0.18**	0.22***; 0.18**; 0.19***	0.45***; 0.23***; 0.44***	0.18**; -0.01ns; 0.05ns	0.24***; 0.1ns; 0.12*	0.09ns; 0.02ns; 0.1ns	-0.04ns; -0.04ns; -0.08ns	0.18***; -0.03ns; 0.06ns	0.04ns; 0.18**; 0.07ns	0.02ns; -0.1ns; -0.15ns	0.12*; 0.09ns; 0ns	0.06ns; -0.15*; -0.03ns	0.42***; 0.14*; 0.34***	0.09ns; -0.02ns; -0.03ns	0.58***; 0.11ns; 0.44***	0.51***; 0.04ns; 0.28***	0.37***; 0.11*; 0.21***	0.21***; 0.01ns; 0.01ns	-0.21***; -0.06ns; -0.32***	0.52***; 0.17**; 0.46***	0.4***; 0.26***; 0.32***	-0.21***; -0.09ns; -0.38***	1***; 1***; 1***	0.36***; 0.05ns; 0.17**	0.13*; -0.12*; -0.11ns	0.41***; 0.07ns; 0.31***	0.52***; 0.08ns; 0.4***	0.31***; -0.02ns; 0.09ns	0.49***; 0.27***; 0.41***	0.59***; 0.02ns; 0.46***	-0.11ns; -0.13*; -0.32***	0.41***; 0.03ns; 0.2***	0.55***; -0.02ns; 0.03ns	0.53***; 0.06ns; -0.03ns	0.16**; -0.04ns; 0.07ns	-0.23***; -0.08ns; -0.33***	0.06ns; -0.03ns; 0.03ns	0.54***; 0.13*; 0.53***	-0.13*; -0.07ns; -0.18**
Znmass_mg.g.1	0.18**; 0ns; 0.1ns	0.18**; 0.04ns; 0.13*	-0.09ns; -0.07ns; -0.12*	-0.01ns; -0.07ns; -0.06ns	0.04ns; -0.06ns; -0.04ns	0.23***; -0.02ns; 0.11ns	-0.22***; -0.06ns; -0.13*	0.1ns; -0.08ns; -0.02ns	0.16**; -0.06ns; 0ns	-0.09ns; -0.01ns; 0.03ns	-0.1ns; -0.09ns; -0.12*	0.15**; 0.08ns; 0.12*	0.18***; -0.03ns; 0.05ns	0.13*; -0.03ns; 0.08ns	0.22***; 0.04ns; 0.06ns	0.14*; 0.02ns; 0.04ns	0.11*; 0.01ns; 0.06ns	0.2***; -0.02ns; 0.07ns	0ns; -0.03ns; -0.02ns	0.07ns; 0.07ns; 0.2*	0ns; -0.06ns; -0.04ns	0.1ns; 0.04ns; 0.09ns	0.28***; 0.02ns; 0.13*	0.26***; 0.18**; 0.19***	0.32***; 0.05ns; 0.15**	0.35***; 0.16**; 0.23***	0.34***; 0.12*; 0.22***	0.14*; -0.06ns; -0.03ns	0.08ns; 0.1ns; -0.01ns	0.36***; 0.07ns; 0.22***	0.36***; 0.13*; 0.26***	0.3***; 0.17**; 0.19***	0.36***; 0.05ns; 0.17**	1***; 1***; 1***	0.35***; 0.15**; 0.23***	0.24***; 0.02ns; 0.11ns	0.52***; 0.27***; 0.41***	0.34***; 0.05ns; 0.17**	0.34***; 0.14*; 0.22***	0.62***; 0.15**; 0.55***	0.2***; 0.09ns; 0.11ns	0.28***; -0.05ns; 0.1ns	0.19***; 0.03ns; 0.02ns	0.27***; 0.17*; 0.24***	0.07ns; -0.04ns; -0.01ns	0.04ns; 0.01ns; -0.1ns	-0.09ns; -0.12*; -0.16**	0.23***; 0ns; 0.12*	-0.01ns; 0.04ns; 0ns
Cumass_mg.g.1	-0.12*; -0.24***; -0.26***	-0.07ns; -0.1ns; -0.11ns	0.07ns; 0.07ns; 0.17**	0.02ns; 0.04ns; 0.13*	0.18***; -0.04ns; 0.21***	-0.15**; -0.21***; -0.28***	0.28***; 0.16**; 0.35***	-0.43***; -0.45***; -0.55***	-0.41***; -0.27***; -0.56***	-0.02ns; -0.04ns; 0.18**	-0.31***; -0.3***; -0.3***	0.35***; 0.26***; 0.31***	-0.31***; -0.33***; -0.45***	0.08ns; -0.06ns; 0.02ns	0.23***; 0.16**; 0.14*	-0.11*; 0.04ns; 0ns	0.03ns; 0.21***; 0.26***	-0.17**; -0.07ns; -0.16*	-0.03ns; -0.07ns; -0.1ns	0.11*; -0.2*; -0.29**	-0.08ns; -0.13*; -0.17**	-0.19***; -0.18**; -0.17**	-0.12*; -0.19***; -0.25***	0.61***; 0.5***; 0.62***	-0.04ns; -0.02ns; -0.18**	0.47***; 0.51***; 0.45***	0.55***; 0.41***; 0.47***	0.24***; 0.09ns; 0.13*	0.41***; 0.14*; 0.26***	0.32***; 0.17**; 0.2***	0.37***; 0.1ns; 0.24***	0.17**; -0.02ns; 0ns	0.13*; -0.12*; -0.11ns	0.35***; 0.15**; 0.23***	1***; 1***; 1***	0.4***; 0.17**; 0.3***	0.15**; 0.03ns; 0.03ns	0.07ns; 0.04ns; -0.05ns	0.19***; 0.02ns; 0.05ns	0.15**; 0.07ns; 0.05ns	0.51***; 0.26***; 0.44***	0.07ns; -0.13*; -0.09ns	0ns; 0.15*; 0.14ns	0.07ns; 0.16*; 0.4***	-0.32***; -0.33***; -0.37***	0.22***; -0.04ns; 0.03ns	-0.47***; -0.49***; -0.61***	-0.12*; 0.02ns; -0.14*	0.29***; 0.22***; 0.29***
Momass_mg.g.1	0.15**; 0.12*; 0.05ns	0.11*; 0.03ns; 0.02ns	-0.02ns; -0.1ns; -0.1ns	-0.02ns; -0.1ns; -0.09ns	0.29***; 0.1ns; 0.24***	0.21***; 0.18**; 0.1ns	-0.01ns; -0.08ns; -0.03ns	-0.11*; -0.02ns; -0.18**	0.03ns; 0.07ns; -0.03ns	-0.18***; -0.08ns; -0.15**	-0.34***; -0.26***; -0.4***	0.4***; 0.32***; 0.41***	0.1ns; 0.21***; 0.06ns	0.43***; 0.18**; 0.35***	0.44***; 0.12*; 0.3***	0.14*; 0.21***; 0.28***	0.15**; 0.14*; 0.32***	-0.1ns; -0.04ns; -0.12ns	-0.03ns; -0.03ns; -0.12*	0.04ns; 0.19*; 0.13ns	-0.03ns; 0.03ns; -0.03ns	-0.26***; -0.13*; -0.3***	0.17**; 0.17**; 0.09ns	0.44***; 0.17**; 0.4***	0.29***; 0.29***; 0.2***	0.6***; 0.32***; 0.52***	0.67***; 0.45***; 0.61***	0.62***; 0.17**; 0.49***	0.15**; -0.04ns; 0ns	0.62***; 0.17**; 0.51***	0.52***; 0.29***; 0.45***	-0.28***; -0.19***; -0.52***	0.41***; 0.07ns; 0.31***	0.24***; 0.02ns; 0.11ns	0.4***; 0.17**; 0.3***	1***; 1***; 1***	0.42***; 0.07ns; 0.32***	0.15**; -0.05ns; -0.03ns	0.47***; 0.09ns; 0.32***	0.42***; 0.32***; 0.35***	-0.03ns; -0.13*; -0.17**	0.5***; 0.11ns; 0.38***	0.35***; 0.09ns; 0.25***	0.29***; 0.01ns; 0.09ns	0.01ns; 0ns; -0.07ns	-0.02ns; -0.22***; -0.23***	-0.34***; -0.16**; -0.43***	0.25***; 0.25***; 0.25***	-0.15**; -0.14*; -0.18**
Comass_mg.g.1	0.3***; 0.08ns; 0.23***	0.21***; -0.03ns; 0.12*	-0.11*; -0.08ns; -0.21***	-0.06ns; -0.1ns; -0.16**	0.21***; 0ns; 0.13*	0.43***; 0.08ns; 0.34***	-0.38***; -0.04ns; -0.37***	0.28***; -0.02ns; 0.22***	0.37***; 0.02ns; 0.29***	-0.11*; -0.09ns; 0.03ns	-0.04ns; -0.14*; -0.08ns	0.1ns; 0.17**; 0.07ns	0.37***; 0.1ns; 0.31***	0.18***; 0.03ns; 0.08ns	0.34***; 0.07ns; 0.15*	0.19***; 0.11ns; 0.12*	0.09ns; 0.04ns; 0ns	0.34***; 0ns; 0.3***	0.06ns; 0.04ns; 0.07ns	0.29***; -0.01ns; 0.3**	0.26***; 0.02ns; 0.14*	0.11*; -0.1ns; 0.06ns	0.46***; 0.12*; 0.38***	0.14**; 0.17**; 0.08ns	0.61***; 0.08ns; 0.53***	0.53***; 0.14*; 0.46***	0.41***; 0.14*; 0.33***	0.34***; 0.02ns; 0.18**	-0.27***; 0ns; -0.45***	0.58***; 0.17**; 0.52***	0.42***; 0.2***; 0.34***	-0.01ns; -0.05ns; -0.2***	0.52***; 0.08ns; 0.4***	0.52***; 0.27***; 0.41***	0.15**; 0.03ns; 0.03ns	0.42***; 0.07ns; 0.32***	1***; 1***; 1***	0.41***; 0.01ns; 0.32***	0.58***; 0.39***; 0.51***	0.76***; 0.15**; 0.71***	-0.11*; -0.05ns; -0.27***	0.56***; 0.02ns; 0.43***	0.69***; 0.06ns; 0.33***	0.71***; 0.64***; 0.4***	0.11ns; 0.05ns; -0.04ns	-0.24***; -0.04ns; -0.45***	0ns; -0.08ns; -0.06ns	0.59***; 0.12*; 0.64***	-0.22***; 0.02ns; -0.2***
Almass_mg.g.1	0.33***; 0.06ns; 0.3***	0.05ns; 0.02ns; -0.01ns	-0.15**; -0.02ns; -0.2***	-0.14*; -0.01ns; -0.22***	0ns; -0.05ns; -0.07ns	0.34***; -0.03ns; 0.24***	-0.3***; 0.25***; -0.16**	0.1ns; -0.08ns; 0.02ns	0.23***; -0.04ns; 0.12*	-0.25***; 0.04ns; -0.04ns	-0.09ns; -0.01ns; -0.07ns	0.13*; -0.02ns; 0.07ns	0.2***; -0.08ns; 0.07ns	0.12*; -0.02ns; 0.03ns	0.11*; -0.02ns; 0.02ns	0.06ns; 0.02ns; -0.16*	0.08ns; 0.08ns; -0.1ns	0.28***; -0.01ns; 0.1ns	-0.08ns; -0.03ns; -0.05ns	0.06ns; 0.33***; 0.1ns	-0.01ns; 0.02ns; 0.05ns	0.03ns; -0.18**; -0.1ns	0.11ns; -0.11*; -0.07ns	0ns; -0.01ns; -0.12*	0.19***; -0.1ns; -0.01ns	0.12*; -0.08ns; -0.05ns	0.13*; -0.04ns; -0.03ns	0.15**; 0.11ns; 0.04ns	0.1ns; 0.27***; 0.04ns	0.26***; -0.01ns; 0.16**	0.23***; 0.05ns; 0.08ns	0.27***; 0.08ns; 0.19***	0.31***; -0.02ns; 0.09ns	0.34***; 0.05ns; 0.17**	0.07ns; 0.04ns; -0.05ns	0.15**; -0.05ns; -0.03ns	0.41***; 0.01ns; 0.32***	1***; 1***; 1***	0.5***; 0.47***; 0.47***	0.32***; 0.05ns; 0.19***	0.15**; -0.04ns; 0.01ns	0.29***; 0.18**; 0.18**	0.26***; 0.22**; 0.41***	0.28***; 0.36***; 0.41***	0.11ns; -0.03ns; 0.01ns	0.05ns; 0.1ns; -0.05ns	0.09ns; -0.04ns; 0.09ns	0.26***; -0.07ns; 0.09ns	0.11*; 0.16**; 0.17**
Asmass_mg.g.1	0.23***; 0.06ns; 0.11ns	0.17**; 0.07ns; 0.07ns	-0.07ns; -0.1ns; -0.15*	-0.04ns; -0.07ns; -0.12*	0.26***; 0.03ns; 0.2***	0.37***; 0.18**; 0.25***	-0.2***; 0.13*; -0.16**	0.05ns; -0.04ns; -0.02ns	0.19***; 0.04ns; 0.09ns	-0.2***; -0.05ns; -0.1ns	-0.16**; -0.08ns; -0.15**	0.19***; 0.12*; 0.16**	0.16**; 0.07ns; 0.08ns	0.31***; 0.02ns; 0.22***	0.29***; 0.09ns; 0.17**	0.14*; 0.12*; 0.11ns	0.11*; 0.07ns; 0.1ns	0.18**; 0.01ns; 0.06ns	0.06ns; 0.17**; 0.08ns	0.06ns; 0.04ns; 0.14ns	0.12*; 0.04ns; 0.01ns	-0.15**; -0.18**; -0.22***	0.2***; 0.09ns; 0.09ns	0.21***; 0.11ns; 0.15**	0.35***; 0.13*; 0.2***	0.44***; 0.13*; 0.31***	0.41***; 0.2***; 0.3***	0.51***; 0.15**; 0.37***	0.04ns; 0.05ns; -0.09ns	0.61***; 0.42***; 0.56***	0.38***; 0.26***; 0.28***	-0.07ns; -0.05ns; -0.19***	0.49***; 0.27***; 0.41***	0.34***; 0.14*; 0.22***	0.19***; 0.02ns; 0.05ns	0.47***; 0.09ns; 0.32***	0.58***; 0.39***; 0.51***	0.5***; 0.47***; 0.47***	1***; 1***; 1***	0.46***; 0.13*; 0.38***	-0.14**; -0.19***; -0.32***	0.59***; 0.26***; 0.48***	0.51***; 0.36***; 0.6***	0.41***; 0.34***; 0.2**	0.08ns; -0.07ns; -0.05ns	-0.07ns; -0.09ns; -0.21***	-0.11*; -0.11ns; -0.17**	0.43***; 0.23***; 0.36***	-0.04ns; 0.01ns; 0ns
Cdmass_mg.g.1	0.27***; 0.02ns; 0.16**	0.23***; -0.06ns; 0.13*	-0.04ns; -0.06ns; -0.12*	0.03ns; -0.08ns; -0.07ns	0.17**; 0.03ns; 0.1ns	0.41***; 0.14*; 0.34***	-0.34***; -0.05ns; -0.34***	0.28***; -0.01ns; 0.21***	0.34***; -0.02ns; 0.23***	-0.02ns; -0.01ns; 0.08ns	-0.07ns; -0.16**; -0.12*	0.15**; 0.17**; 0.13*	0.39***; 0.11*; 0.33***	0.14*; 0.01ns; 0.03ns	0.32***; 0.01ns; 0.15*	0.22***; 0ns; 0.22***	0.12*; 0.01ns; 0.1ns	0.21***; 0.01ns; 0.12ns	-0.04ns; 0.01ns; -0.04ns	0.14*; 0.02ns; 0.19*	0.12*; 0.08ns; 0.08ns	0.18***; -0.05ns; 0.13*	0.47***; 0.06ns; 0.37***	0.14*; 0.09ns; 0.09ns	0.57***; 0.2***; 0.48***	0.48***; 0.24***; 0.41***	0.36***; 0.19***; 0.3***	0.21***; 0ns; 0.04ns	-0.22***; -0.06ns; -0.39***	0.51***; 0.18**; 0.46***	0.45***; 0.13*; 0.39***	0.03ns; -0.05ns; -0.15*	0.59***; 0.02ns; 0.46***	0.62***; 0.15**; 0.55***	0.15**; 0.07ns; 0.05ns	0.42***; 0.32***; 0.35***	0.76***; 0.15**; 0.71***	0.32***; 0.05ns; 0.19***	0.46***; 0.13*; 0.38***	1***; 1***; 1***	-0.05ns; -0.06ns; -0.2***	0.38***; -0.02ns; 0.23***	0.55***; 0.03ns; 0.08ns	0.59***; 0.21**; 0.22**	0.15**; -0.05ns; 0.03ns	-0.17**; -0.13*; -0.39***	0.04ns; -0.06ns; -0.06ns	0.54***; 0.18**; 0.55***	-0.22***; -0.01ns; -0.24***
Rbmass_mg.g.1	-0.05ns; -0.1ns; -0.1ns	-0.07ns; -0.1ns; -0.11ns	-0.01ns; 0.02ns; 0.07ns	-0.02ns; 0.02ns; 0.03ns	-0.02ns; 0ns; 0ns	-0.12*; -0.2***; -0.19***	0.21***; -0.04ns; 0.26***	-0.33***; -0.33***; -0.43***	-0.32***; -0.19***; -0.41***	-0.05ns; -0.01ns; 0.18**	-0.26***; -0.21***; -0.25***	0.3***; 0.17**; 0.26***	-0.23***; -0.27***; -0.33***	-0.04ns; -0.12*; -0.09ns	-0.05ns; 0.05ns; 0.04ns	-0.13*; -0.19**; -0.12ns	0.02ns; -0.06ns; 0.12ns	-0.22***; -0.11ns; -0.21**	-0.2***; -0.19***; -0.21***	0.07ns; -0.23*; -0.35***	-0.28***; -0.15*; -0.14*	0.04ns; 0.03ns; 0.03ns	-0.16**; -0.28***; -0.32***	0.39***; 0.24***; 0.33***	-0.18***; -0.28***; -0.38***	0.11ns; 0.06ns; 0.01ns	0.22***; 0.04ns; 0.09ns	-0.17**; -0.29***; -0.36***	0.41***; 0.14*; 0.3***	0.01ns; -0.11*; -0.16**	0.12*; -0.11ns; -0.03ns	0.49***; 0.31***; 0.4***	-0.11ns; -0.13*; -0.32***	0.2***; 0.09ns; 0.11ns	0.51***; 0.26***; 0.44***	-0.03ns; -0.13*; -0.17**	-0.11*; -0.05ns; -0.27***	0.15**; -0.04ns; 0.01ns	-0.14**; -0.19***; -0.32***	-0.05ns; -0.06ns; -0.2***	1***; 1***; 1***	-0.22***; -0.26***; -0.42***	-0.24***; -0.08ns; -0.16*	-0.1ns; 0.11ns; 0.37***	-0.21***; -0.22***; -0.25***	0.39***; 0.17**; 0.26***	-0.23***; -0.24***; -0.3***	-0.25***; -0.23***; -0.38***	0.36***; 0.28***; 0.38***
Srmass_mg.g.1	0.16**; 0.08ns; 0ns	0.16**; 0.01ns; 0.05ns	-0.14*; -0.24***; -0.26***	-0.12*; -0.25***; -0.25***	0.24***; 0.1ns; 0.21***	0.22***; 0.05ns; 0.04ns	-0.14*; -0.01ns; -0.12*	0.06ns; -0.04ns; -0.05ns	0.2***; 0.15**; 0.07ns	-0.15**; -0.16**; -0.22***	-0.11ns; -0.12*; -0.15**	0.18**; 0.18**; 0.14*	0.17**; 0.06ns; 0.03ns	0.35***; 0.19***; 0.32***	0.28***; 0.05ns; 0.11ns	0.12*; 0.21***; 0.17**	0.07ns; 0.19**; 0.15*	0.05ns; 0ns; 0.07ns	0.02ns; -0.04ns; -0.05ns	0.13*; 0.36***; 0.31***	0.13*; -0.04ns; -0.1ns	-0.22***; -0.29***; -0.29***	0.2***; 0.06ns; 0.04ns	0.2***; 0.07ns; 0.13*	0.35***; 0.13*; 0.2***	0.48***; 0.22***; 0.35***	0.48***; 0.26***; 0.39***	0.74***; 0.48***; 0.68***	0.03ns; 0.02ns; -0.1ns	0.52***; 0.19***; 0.41***	0.28***; 0.08ns; 0.17**	-0.15**; -0.19***; -0.34***	0.41***; 0.03ns; 0.2***	0.28***; -0.05ns; 0.1ns	0.07ns; -0.13*; -0.09ns	0.5***; 0.11ns; 0.38***	0.56***; 0.02ns; 0.43***	0.29***; 0.18**; 0.18**	0.59***; 0.26***; 0.48***	0.38***; -0.02ns; 0.23***	-0.22***; -0.26***; -0.42***	1***; 1***; 1***	0.48***; 0.08ns; 0.18*	0.45***; 0.16*; 0.06ns	0.14*; -0.02ns; -0.03ns	-0.11*; -0.24***; -0.27***	-0.12*; -0.1ns; -0.17**	0.42***; 0.41***; 0.4***	-0.12*; -0.09ns; -0.17**
Semass_mg.g.1	0.22***; 0.09ns; 0.16*	0.18**; 0.08ns; 0.03ns	-0.06ns; -0.01ns; -0.09ns	0ns; 0.02ns; -0.09ns	0.2***; -0.02ns; 0.07ns	0.35***; 0.01ns; 0.12ns	-0.3***; 0.37***; 0.16*	0.26***; -0.06ns; -0.16*	0.33***; -0.02ns; -0.05ns	-0.07ns; -0.05ns; -0.15*	-0.06ns; 0.07ns; -0.14ns	0.09ns; -0.04ns; 0.13ns	0.36***; -0.08ns; -0.11ns	0.21***; 0.09ns; 0.27***	0.22***; 0.08ns; 0.1ns	0.17**; 0.02ns; 0.01ns	0.03ns; 0.1ns; 0.1ns	0.19***; 0.03ns; -0.1ns	-0.02ns; 0.22**; 0.01ns	0.18**; 0.07ns; -0.02ns	0.37***; 0.01ns; 0.15*	0.13*; -0.18*; -0.38***	0.4***; -0.07ns; -0.14ns	0.06ns; 0.02ns; 0.13ns	0.58***; -0.08ns; -0.07ns	0.48***; -0.04ns; 0.17*	0.29***; 0.07ns; 0.25***	0.29***; 0.06ns; 0.28***	-0.5***; 0.09ns; 0.22**	0.48***; 0ns; 0.12ns	0.25***; -0.02ns; 0.1ns	-0.32***; 0.11ns; -0.1ns	0.55***; -0.02ns; 0.03ns	0.19***; 0.03ns; 0.02ns	0ns; 0.15*; 0.14ns	0.35***; 0.09ns; 0.25***	0.69***; 0.06ns; 0.33***	0.26***; 0.22**; 0.41***	0.51***; 0.36***; 0.6***	0.55***; 0.03ns; 0.08ns	-0.24***; -0.08ns; -0.16*	0.48***; 0.08ns; 0.18*	1***; 1***; 1***	0.83***; 0.22**; 0.17*	0.11*; -0.07ns; -0.06ns	-0.38***; 0.19**; -0.04ns	0.01ns; -0.06ns; -0.19**	0.62***; -0.06ns; -0.12ns	-0.2***; 0.11ns; 0.13ns
Nimass_mg.g.1	0.21***; 0.03ns; 0.05ns	0.19***; -0.04ns; 0.02ns	-0.04ns; -0.11ns; -0.04ns	0.02ns; -0.12ns; -0.03ns	0.21***; -0.05ns; 0.08ns	0.28***; -0.1ns; -0.2**	-0.32***; 0.09ns; 0.12ns	0.24***; -0.2**; -0.24***	0.25***; -0.2**; -0.34***	0ns; 0.05ns; 0.44***	-0.05ns; -0.19*; -0.15*	0.09ns; 0.15*; 0.17*	0.34***; -0.16*; -0.19**	0.08ns; -0.15*; -0.2**	0.21***; 0.07ns; 0.11ns	0.09ns; -0.06ns; -0.01ns	-0.04ns; 0.01ns; 0.06ns	0.16**; -0.08ns; -0.13ns	-0.01ns; -0.05ns; -0.01ns	0.28***; -0.11ns; -0.16ns	0.27***; -0.16*; -0.2**	0.23***; -0.11ns; 0.01ns	0.37***; -0.22**; -0.21**	0.05ns; 0.08ns; 0.18*	0.52***; -0.23**; -0.27***	0.42***; -0.06ns; 0.02ns	0.22***; 0.01ns; 0.1ns	0.19***; 0.02ns; 0.01ns	-0.48***; 0.34***; 0.33***	0.43***; -0.06ns; -0.03ns	0.32***; 0.26***; 0.37***	-0.18***; 0.15*; 0.32***	0.53***; 0.06ns; -0.03ns	0.27***; 0.17*; 0.24***	0.07ns; 0.16*; 0.4***	0.29***; 0.01ns; 0.09ns	0.71***; 0.64***; 0.4***	0.28***; 0.36***; 0.41***	0.41***; 0.34***; 0.2**	0.59***; 0.21**; 0.22**	-0.1ns; 0.11ns; 0.37***	0.45***; 0.16*; 0.06ns	0.83***; 0.22**; 0.17*	1***; 1***; 1***	0.06ns; -0.16*; -0.25***	-0.32***; 0.2**; 0.16*	0.04ns; -0.16*; -0.17*	0.61***; -0.18*; -0.26***	-0.1ns; 0.3***; 0.44***
Chlarea_SPAD	0.14*; 0.2***; 0.13*	0.09ns; -0.03ns; -0.07ns	-0.05ns; -0.1ns; -0.12*	-0.02ns; -0.14*; -0.15**	-0.04ns; -0.04ns; -0.13*	0.31***; 0.27***; 0.2***	-0.29***; -0.01ns; -0.14*	0.57***; 0.48***; 0.45***	0.59***; 0.17**; 0.42***	-0.02ns; -0.01ns; -0.05ns	0.24***; 0.16**; 0.16**	-0.19***; -0.16**; -0.18**	0.52***; 0.45***; 0.4***	0.06ns; 0.05ns; 0ns	0.02ns; -0.1ns; -0.09ns	0.31***; 0.18**; 0.19**	0.14*; 0.07ns; -0.04ns	0.27***; 0.12ns; 0.22***	0.01ns; -0.05ns; -0.02ns	-0.17**; 0.22*; 0.25**	0ns; 0.16*; 0.08ns	0.2***; 0.13*; 0.12*	0.52***; 0.38***; 0.38***	-0.17**; -0.25***; -0.29***	0.39***; 0.2***; 0.23***	-0.1ns; -0.21***; -0.26***	-0.17**; -0.16**; -0.25***	0.04ns; -0.07ns; -0.09ns	-0.21***; -0.18**; -0.18**	0.02ns; -0.09ns; -0.11ns	-0.08ns; -0.08ns; -0.15*	-0.07ns; -0.12*; -0.1ns	0.16**; -0.04ns; 0.07ns	0.07ns; -0.04ns; -0.01ns	-0.32***; -0.33***; -0.37***	0.01ns; 0ns; -0.07ns	0.11ns; 0.05ns; -0.04ns	0.11ns; -0.03ns; 0.01ns	0.08ns; -0.07ns; -0.05ns	0.15**; -0.05ns; 0.03ns	-0.21***; -0.22***; -0.25***	0.14*; -0.02ns; -0.03ns	0.11*; -0.07ns; -0.06ns	0.06ns; -0.16*; -0.25***	1***; 1***; 1***	-0.01ns; -0.04ns; 0.03ns	0.26***; 0.4***; 0.3***	0.41***; 0.12*; 0.24***	-0.36***; -0.3***; -0.29***
N_P	-0.26***; -0.28***; -0.28***	-0.1ns; -0.08ns; -0.05ns	0.15**; 0.28***; 0.28***	0.15**; 0.28***; 0.27***	0.05ns; 0.07ns; 0.15**	-0.27***; -0.34***; -0.32***	0.42***; 0.22***; 0.48***	-0.25***; -0.35***; -0.32***	-0.29***; -0.26***; -0.38***	0.06ns; 0.02ns; -0.01ns	0.03ns; 0.05ns; 0.06ns	0.01ns; -0.09ns; -0.06ns	-0.33***; -0.41***; -0.42***	-0.05ns; 0.03ns; -0.01ns	0ns; -0.08ns; 0.02ns	-0.14**; -0.2**; -0.08ns	-0.06ns; -0.09ns; 0.08ns	-0.22***; -0.17**; -0.21**	0.05ns; 0.03ns; 0.01ns	-0.21***; -0.22*; -0.18ns	-0.23***; -0.26***; -0.22***	-0.04ns; -0.04ns; -0.08ns	-0.11*; -0.25***; -0.22***	0.34***; 0.22***; 0.27***	-0.51***; -0.69***; -0.77***	-0.41***; -0.59***; -0.68***	-0.12*; -0.33***; -0.31***	0.07ns; -0.01ns; -0.05ns	0.56***; 0.32***; 0.48***	-0.04ns; -0.22***; -0.26***	0.09ns; -0.12*; -0.09ns	0.48***; 0.22***; 0.37***	-0.23***; -0.08ns; -0.33***	0.04ns; 0.01ns; -0.1ns	0.22***; -0.04ns; 0.03ns	-0.02ns; -0.22***; -0.23***	-0.24***; -0.04ns; -0.45***	0.05ns; 0.1ns; -0.05ns	-0.07ns; -0.09ns; -0.21***	-0.17**; -0.13*; -0.39***	0.39***; 0.17**; 0.26***	-0.11*; -0.24***; -0.27***	-0.38***; 0.19**; -0.04ns	-0.32***; 0.2**; 0.16*	-0.01ns; -0.04ns; 0.03ns	1***; 1***; 1***	-0.19***; -0.29***; -0.28***	-0.34***; -0.51***; -0.56***	0.26***; 0.26***; 0.24***
C_N	0.2***; 0.33***; 0.25***	0.18***; 0.17**; 0.14*	-0.01ns; -0.14*; -0.13*	0.04ns; -0.11ns; -0.09ns	-0.18***; -0.15*; -0.39***	0.17**; 0.17**; 0.14*	-0.31***; -0.14*; -0.41***	0.65***; 0.73***; 0.69***	0.52***; 0.31***; 0.52***	0.24***; 0.15**; 0.16**	0.57***; 0.5***; 0.56***	-0.5***; -0.46***; -0.58***	0.44***; 0.44***; 0.43***	-0.35***; -0.17**; -0.37***	-0.24***; -0.21***; -0.33***	0.17**; -0.04ns; -0.11ns	-0.06ns; -0.12ns; -0.46***	0.36***; 0.22***; 0.22***	0.16**; 0.09ns; 0.19***	-0.05ns; 0.12ns; 0.01ns	0.24***; 0.32***; 0.24***	0.53***; 0.44***; 0.44***	0.23***; 0.12*; 0.14*	-0.82***; -0.85***; -0.98***	0.28***; 0.31***; 0.29***	-0.38***; -0.35***; -0.5***	-0.53***; -0.51***; -0.65***	-0.26***; -0.24***; -0.35***	-0.29***; -0.28***; -0.35***	-0.35***; -0.16**; -0.38***	-0.26***; -0.22***; -0.34***	0.06ns; 0.02ns; 0.08ns	0.06ns; -0.03ns; 0.03ns	-0.09ns; -0.12*; -0.16**	-0.47***; -0.49***; -0.61***	-0.34***; -0.16**; -0.43***	0ns; -0.08ns; -0.06ns	0.09ns; -0.04ns; 0.09ns	-0.11*; -0.11ns; -0.17**	0.04ns; -0.06ns; -0.06ns	-0.23***; -0.24***; -0.3***	-0.12*; -0.1ns; -0.17**	0.01ns; -0.06ns; -0.19**	0.04ns; -0.16*; -0.17*	0.26***; 0.4***; 0.3***	-0.19***; -0.29***; -0.28***	1***; 1***; 1***	0.33***; 0.12*; 0.16**	-0.06ns; -0.14*; -0.11*
SPAD_Narea	0.25***; 0.07ns; 0.1ns	0.25***; 0.06ns; 0.12*	-0.1ns; -0.26***; -0.25***	-0.04ns; -0.24***; -0.21***	0.14*; 0.04ns; 0.09ns	0.43***; 0.23***; 0.34***	-0.47***; -0.2***; -0.44***	0.54***; 0.22***; 0.43***	0.58***; 0.16**; 0.44***	-0.03ns; 0.02ns; 0.07ns	0.14*; -0.04ns; 0ns	-0.06ns; 0.08ns; 0.01ns	0.58***; 0.28***; 0.49***	0.12*; -0.05ns; 0.04ns	0.18**; 0.26***; 0.16**	0.19***; 0.1ns; 0.19**	-0.04ns; 0.03ns; -0.06ns	0.35***; 0.14*; 0.37***	0.11ns; -0.03ns; 0.05ns	-0.01ns; 0.16ns; 0.16ns	0.21***; 0.14*; 0.09ns	0.23***; 0.1ns; 0.15*	0.55***; 0.28***; 0.47***	-0.18***; -0.01ns; -0.13*	0.68***; 0.49***; 0.66***	0.3***; 0.44***; 0.38***	0.1ns; 0.24***; 0.14*	0.19***; 0.03ns; 0.08ns	-0.48***; -0.45***; -0.69***	0.36***; 0.48***; 0.46***	0.16**; 0.17**; 0.16**	-0.26***; -0.3***; -0.46***	0.54***; 0.13*; 0.53***	0.23***; 0ns; 0.12*	-0.12*; 0.02ns; -0.14*	0.25***; 0.25***; 0.25***	0.59***; 0.12*; 0.64***	0.26***; -0.07ns; 0.09ns	0.43***; 0.23***; 0.36***	0.54***; 0.18**; 0.55***	-0.25***; -0.23***; -0.38***	0.42***; 0.41***; 0.4***	0.62***; -0.06ns; -0.12ns	0.61***; -0.18*; -0.26***	0.41***; 0.12*; 0.24***	-0.34***; -0.51***; -0.56***	0.33***; 0.12*; 0.16**	1***; 1***; 1***	-0.31***; -0.2***; -0.32***
D13C_permil	-0.06ns; -0.11ns; -0.07ns	-0.08ns; -0.11ns; -0.1ns	-0.01ns; 0.06ns; 0.06ns	-0.05ns; 0.03ns; 0.02ns	-0.11ns; -0.12*; -0.1ns	-0.36***; -0.42***; -0.42***	0.45***; 0.21***; 0.44***	-0.5***; -0.47***; -0.53***	-0.54***; -0.28***; -0.56***	0.06ns; 0.08ns; 0.2***	-0.17**; -0.2***; -0.17**	0.19***; 0.12*; 0.17**	-0.45***; -0.43***; -0.48***	-0.17**; -0.19***; -0.15*	-0.09ns; 0.08ns; 0.1ns	-0.2***; -0.18**; -0.25***	-0.02ns; -0.1ns; 0.02ns	-0.31***; -0.01ns; -0.24***	-0.14*; -0.11ns; -0.04ns	0.25***; -0.46***; -0.41***	-0.05ns; -0.18**; -0.12ns	-0.03ns; -0.04ns; -0.02ns	-0.53***; -0.61***; -0.62***	0.2***; 0.08ns; 0.12*	-0.48***; -0.48***; -0.54***	-0.1ns; -0.07ns; -0.1ns	0.01ns; -0.07ns; -0.04ns	-0.04ns; -0.08ns; -0.08ns	0.39***; 0.28***; 0.34***	-0.2***; -0.07ns; -0.16**	0.06ns; -0.03ns; 0.01ns	0.3***; 0.27***; 0.32***	-0.13*; -0.07ns; -0.18**	-0.01ns; 0.04ns; 0ns	0.29***; 0.22***; 0.29***	-0.15**; -0.14*; -0.18**	-0.22***; 0.02ns; -0.2***	0.11*; 0.16**; 0.17**	-0.04ns; 0.01ns; 0ns	-0.22***; -0.01ns; -0.24***	0.36***; 0.28***; 0.38***	-0.12*; -0.09ns; -0.17**	-0.2***; 0.11ns; 0.13ns	-0.1ns; 0.3***; 0.44***	-0.36***; -0.3***; -0.29***	0.26***; 0.26***; 0.24***	-0.06ns; -0.14*; -0.11*	-0.31***; -0.2***; -0.32***	1***; 1***; 1***
TLP_.MPa	-0.04ns; 0ns; -0.04ns	0.1ns; 0.08ns; 0.09ns	0.16**; 0.11ns; 0.13*	0.2***; 0.17**; 0.17**	0.09ns; 0.07ns; 0.08ns	0.19***; 0.26***; 0.24***	-0.28***; -0.07ns; -0.33***	0.55***; 0.44***; 0.52***	0.39***; 0.19***; 0.33***	0.36***; 0.29***; 0.15**	0.62***; 0.53***; 0.57***	-0.56***; -0.48***; -0.57***	0.27***; 0.21***; 0.22***	-0.28***; -0.15**; -0.26***	0.01ns; -0.1ns; -0.2**	0.06ns; -0.01ns; -0.07ns	-0.17**; -0.08ns; -0.35***	0.42***; 0.09ns; 0.35***	0.53***; 0.53***; 0.5***	-0.12*; 0.06ns; -0.01ns	0.23***; 0.11ns; 0.12*	0.17**; 0.09ns; 0.1ns	0.44***; 0.43***; 0.44***	-0.33***; -0.34***; -0.34***	0.36***; 0.33***; 0.36***	-0.1ns; -0.17**; -0.17**	-0.19***; -0.16**; -0.22***	0.04ns; 0.06ns; 0.03ns	-0.25***; -0.27***; -0.32***	0.03ns; 0.09ns; 0.07ns	0.01ns; 0.07ns; 0.02ns	-0.03ns; -0.09ns; -0.11ns	0.18**; 0.23***; 0.24***	0.06ns; -0.05ns; -0.02ns	-0.26***; -0.29***; -0.33***	-0.09ns; -0.09ns; -0.1ns	0.19***; -0.06ns; 0.16**	0.02ns; -0.11ns; -0.03ns	0.09ns; 0.08ns; 0.09ns	0.13*; -0.08ns; 0.1ns	-0.33***; -0.32***; -0.42***	0.13*; 0.09ns; 0.1ns	0.16**; 0.02ns; -0.11ns	0.11*; -0.26***; -0.26***	0.23***; 0.14*; 0.15**	-0.06ns; -0.12*; -0.11*	0.37***; 0.26***; 0.33***	0.3***; 0.16**; 0.25***	-0.34***; -0.4***; -0.39***
K0.1_mmol.m.2.s.1.MPa.1	-0.24***; -0.1ns; -0.04ns	-0.21***; -0.02ns; -0.01ns	0ns; 0.16ns; 0.12ns	-0.05ns; 0.2ns; 0.12ns	-0.13*; 0.25ns; 0.14ns	-0.41***; -0.08ns; 0.01ns	0.34***; -0.28ns; -0.25ns	-0.44***; 0.03ns; 0.19ns	-0.43***; 0.06ns; 0.23ns	-0.06ns; -0.46**; -0.45**	-0.13*; 0.47**; 0.41*	0.08ns; -0.36*; -0.41*	-0.44***; -0.08ns; 0.02ns	-0.07ns; 0.32ns; 0.1ns	-0.24***; -0.24ns; 0ns	-0.34***; -0.59*; -0.69**	-0.17**; -0.55*; -0.55*	-0.39***; 0.68**; 0.51*	-0.11*; 0.41*; 0.22ns	-0.19***; 0.42*; 0.29ns	-0.26***; 0.16ns; 0.15ns	-0.13*; -0.26ns; -0.26ns	-0.52***; 0.04ns; 0.13ns	0.05ns; -0.09ns; -0.17ns	-0.58***; 0.1ns; 0.25ns	-0.31***; -0.02ns; 0.05ns	-0.17**; -0.18ns; -0.14ns	-0.13*; -0.3ns; -0.32ns	0.35***; -0.21ns; -0.21ns	-0.27***; 0.04ns; 0.16ns	-0.21***; -0.34ns; -0.17ns	0.11*; -0.35*; -0.35*	-0.39***; 0.04ns; 0.25ns	-0.29***; -0.07ns; -0.01ns	-0.03ns; -0.2ns; -0.15ns	-0.24***; -0.17ns; -0.2ns	-0.51***; -0.18ns; -0.04ns	-0.17**; -0.16ns; -0.19ns	-0.29***; -0.17ns; -0.16ns	-0.47***; -0.31ns; -0.32ns	0.19***; -0.07ns; -0.16ns	-0.27***; -0.14ns; -0.06ns	-0.42***; -0.13ns; -0.2ns	-0.39***; -0.17ns; -0.22ns	-0.16**; 0ns; -0.05ns	0.27***; -0.05ns; -0.26ns	-0.14*; -0.01ns; 0.14ns	-0.49***; -0.03ns; 0.07ns	0.29***; -0.38*; -0.33ns
psi_K0.1_80_.Mpa	-0.24***; -0.17ns; -0.12ns	-0.21***; -0.01ns; 0.1ns	0ns; -0.06ns; -0.1ns	-0.05ns; -0.05ns; -0.07ns	-0.13*; 0.1ns; -0.08ns	-0.41***; -0.05ns; -0.05ns	0.35***; 0.01ns; 0.28ns	-0.44***; -0.11ns; -0.03ns	-0.43***; -0.06ns; -0.04ns	-0.06ns; 0.06ns; 0.02ns	-0.14*; -0.08ns; -0.13ns	0.08ns; 0.05ns; 0.11ns	-0.44***; -0.08ns; 0.02ns	-0.07ns; 0.08ns; 0.06ns	-0.24***; 0.07ns; -0.06ns	-0.34***; 0.14ns; 0.39ns	-0.17**; 0.08ns; 0.23ns	-0.39***; -0.07ns; -0.14ns	-0.12*; -0.04ns; -0.08ns	-0.2***; -0.25ns; -0.32ns	-0.26***; 0.01ns; 0.07ns	-0.13*; 0.07ns; -0.09ns	-0.52***; 0.14ns; 0.22ns	0.06ns; 0.27ns; 0.26ns	-0.58***; -0.07ns; 0.01ns	-0.31***; 0.01ns; 0.06ns	-0.17**; 0.07ns; 0.09ns	-0.13*; 0.01ns; 0.16ns	0.35***; -0.05ns; 0.06ns	-0.27***; -0.16ns; -0.21ns	-0.21***; 0.19ns; 0.1ns	0.11*; -0.06ns; 0ns	-0.39***; 0.05ns; 0.06ns	-0.29***; -0.03ns; -0.07ns	-0.03ns; 0.16ns; 0.08ns	-0.23***; 0.03ns; 0.23ns	-0.51***; -0.07ns; -0.12ns	-0.17**; -0.11ns; -0.04ns	-0.29***; -0.15ns; -0.07ns	-0.47***; 0.05ns; 0.08ns	0.19***; 0.38*; 0.13ns	-0.27***; -0.13ns; -0.03ns	-0.41***; -0.08ns; 0.06ns	-0.39***; -0.08ns; -0.02ns	-0.16**; -0.03ns; 0ns	0.28***; 0.3ns; 0.26ns	-0.14*; -0.24ns; -0.27ns	-0.49***; -0.17ns; -0.17ns	0.29***; -0.04ns; -0.06ns
Jmax_area_umol.m.2.s.1	-0.13*; -0.19ns; -0.23ns	-0.17**; 0.1ns; 0.01ns	0ns; -0.06ns; 0ns	-0.04ns; -0.05ns; 0ns	-0.12*; 0.05ns; 0.24ns	-0.31***; -0.13ns; -0.23ns	0.24***; 0.14ns; 0.33*	-0.3***; -0.17ns; -0.16ns	-0.28***; 0.08ns; 0.02ns	-0.12*; -0.37*; -0.36*	-0.08ns; 0.05ns; 0.02ns	0.03ns; -0.02ns; -0.03ns	-0.3***; -0.2ns; -0.2ns	-0.1ns; 0.48**; 0.31*	-0.17**; 0.14ns; 0.21ns	-0.14*; -0.17ns; -0.03ns	-0.01ns; -0.18ns; -0.09ns	-0.2***; 0.28ns; 0.31ns	-0.1ns; 0.08ns; 0.14ns	-0.24***; 0.34ns; 0.29ns	-0.08ns; 0.02ns; 0.01ns	-0.04ns; -0.43**; -0.47**	-0.4***; 0.06ns; 0.03ns	-0.04ns; 0.26ns; 0.3ns	-0.46***; -0.1ns; -0.14ns	-0.33***; 0.04ns; 0.07ns	-0.2***; 0.14ns; 0.17ns	-0.1ns; 0.28ns; 0.26ns	0.26***; 0.26ns; 0.26ns	-0.24***; 0.08ns; 0.15ns	-0.17**; -0.14ns; -0.08ns	0.19***; 0.1ns; -0.05ns	-0.33***; -0.02ns; -0.1ns	-0.18**; 0.06ns; -0.06ns	-0.07ns; -0.17ns; -0.09ns	-0.26***; -0.06ns; 0.14ns	-0.37***; 0.02ns; 0.04ns	-0.03ns; -0.04ns; -0.09ns	-0.22***; 0.04ns; 0.07ns	-0.37***; 0.01ns; 0.09ns	0.12*; -0.06ns; -0.18ns	-0.17**; 0.34*; 0.37*	-0.33***; -0.09ns; -0.07ns	-0.28***; -0.33*; -0.33*	-0.1ns; 0.02ns; 0.01ns	0.2***; 0.22ns; 0.26ns	-0.03ns; -0.3*; -0.34*	-0.38***; -0.23ns; -0.25ns	0.27***; -0.31*; -0.24ns
Vcmax_area_umol.m.2.s.1	-0.17**; -0.24ns; -0.32*	-0.17**; -0.02ns; -0.14ns	0.05ns; 0.15ns; 0.3*	0ns; 0.13ns; 0.26ns	-0.07ns; 0.13ns; 0.27ns	-0.34***; -0.03ns; -0.2ns	0.28***; -0.01ns; 0.36*	-0.35***; -0.15ns; -0.24ns	-0.34***; -0.06ns; -0.19ns	-0.1ns; -0.15ns; -0.15ns	-0.12*; -0.02ns; -0.08ns	0.08ns; -0.01ns; 0.08ns	-0.34***; -0.09ns; -0.23ns	-0.07ns; 0.24ns; 0.19ns	-0.12*; -0.13ns; -0.07ns	-0.19***; -0.33*; -0.42**	-0.06ns; -0.33*; -0.4*	-0.26***; 0.68***; 0.65***	-0.08ns; 0.19ns; 0.24ns	-0.21***; -0.16ns; -0.31ns	-0.11*; -0.04ns; -0.13ns	-0.09ns; -0.27ns; -0.37**	-0.42***; 0.12ns; 0ns	0.02ns; 0.18ns; 0.38**	-0.47***; 0.12ns; -0.07ns	-0.26***; 0.21ns; 0.36*	-0.13*; 0.02ns; 0.13ns	-0.04ns; -0.02ns; 0ns	0.29***; 0.01ns; 0.2ns	-0.19***; -0.08ns; -0.01ns	-0.12*; -0.13ns; -0.05ns	0.14*; -0.14ns; -0.19ns	-0.28***; 0.07ns; 0.04ns	-0.17**; 0.04ns; -0.09ns	-0.01ns; -0.06ns; 0.27ns	-0.18**; -0.1ns; 0.19ns	-0.34***; -0.01ns; -0.12ns	-0.05ns; 0.18ns; -0.01ns	-0.19***; 0.02ns; -0.05ns	-0.34***; 0.08ns; 0.09ns	0.13*; 0.16ns; 0.14ns	-0.13*; 0.02ns; -0.09ns	-0.29***; 0.14ns; 0.13ns	-0.21***; -0.2ns; -0.12ns	-0.15**; -0.04ns; -0.21ns	0.21***; 0.04ns; 0.11ns	-0.09ns; -0.27ns; -0.4**	-0.37***; -0.23ns; -0.37*	0.29***; -0.02ns; 0.06ns
gc_mod_mol.m.2.s.1	0.22***; 0.2***; 0.17**	0.29***; 0.24***; 0.23***	0ns; -0.06ns; -0.05ns	0.1ns; 0.02ns; 0.03ns	0.04ns; 0.03ns; -0.09ns	0.45***; 0.45***; 0.42***	-0.41***; -0.11*; -0.42***	0.69***; 0.67***; 0.69***	0.59***; 0.26***; 0.52***	0.23***; 0.3***; 0.35***	0.2***; 0.23***; 0.22***	-0.13*; -0.17**; -0.21***	0.69***; 0.67***; 0.68***	-0.11*; -0.19**; -0.26***	0.12*; -0.15*; -0.19**	0.34***; 0.1ns; 0.13*	0.11*; -0.18**; -0.24***	0.4***; 0.05ns; 0.21***	0.1ns; 0.16**; 0.18**	0.18**; -0.08ns; -0.17ns	0.28***; 0.28***; 0.22***	0.3***; 0.3***; 0.31***	0.74***; 0.69***; 0.7***	-0.14*; -0.26***; -0.3***	0.79***; 0.61***; 0.73***	0.29***; 0.12*; 0.15**	0.07ns; 0ns; -0.07ns	0.09ns; -0.14*; -0.16**	-0.31***; -0.38***; -0.51***	0.09ns; 0.02ns; -0.02ns	0.16**; 0.1ns; 0.05ns	-0.04ns; -0.17**; -0.19***	0.51***; 0.11ns; 0.36***	0.3***; 0.02ns; 0.12*	-0.03ns; -0.15*; -0.17**	0.09ns; 0.11ns; -0.05ns	0.44***; 0.1ns; 0.33***	0.25***; -0.06ns; 0.1ns	0.25***; 0.05ns; 0.1ns	0.43***; 0.09ns; 0.29***	-0.08ns; -0.22***; -0.2***	0.23***; 0.05ns; 0.04ns	0.42***; -0.03ns; -0.04ns	0.41***; -0.11ns; 0.02ns	0.38***; 0.3***; 0.25***	-0.27***; -0.43***; -0.43***	0.31***; 0.35***; 0.34***	0.51***; 0.29***; 0.44***	-0.04ns; -0.01ns; -0.01ns
gc_gmax	0.56***; 0.4***; 0.45***	0.33***; -0.01ns; 0.06ns	-0.33***; -0.53***; -0.74***	-0.27***; -0.57***; -0.76***	0.08ns; -0.13*; -0.23***	0.56***; 0.31***; 0.35***	-0.45***; -0.18**; -0.48***	0.41***; 0.47***; 0.41***	0.48***; 0.26***; 0.4***	-0.12*; 0.02ns; 0.15*	-0.05ns; 0ns; -0.03ns	0.12*; 0ns; 0.03ns	0.53***; 0.51***; 0.5***	0.21***; -0.06ns; -0.03ns	0.1ns; -0.08ns; -0.08ns	0.23***; 0.02ns; -0.03ns	0.13*; -0.08ns; -0.16*	0.31***; 0.11ns; 0.2**	-0.15**; -0.08ns; -0.01ns	0.21***; 0.06ns; 0.02ns	0.15**; 0.27***; 0.15*	0.19***; 0.11ns; 0.14*	0.43***; 0.28***; 0.3***	-0.09ns; -0.27***; -0.31***	0.64***; 0.39***; 0.53***	0.39***; 0.13*; 0.23***	0.22***; 0.01ns; 0.01ns	0.21***; -0.03ns; -0.04ns	-0.27***; -0.22***; -0.38***	0.26***; -0.02ns; 0.04ns	0.16**; -0.03ns; -0.02ns	-0.16**; -0.11ns; -0.24***	0.47***; 0ns; 0.26***	0.26***; -0.02ns; 0.1ns	-0.04ns; -0.16**; -0.22***	0.25***; 0.12*; 0.04ns	0.5***; 0.04ns; 0.34***	0.36***; -0.04ns; 0.22***	0.37***; -0.03ns; 0.13*	0.4***; 0.11ns; 0.22***	-0.04ns; -0.13*; -0.16**	0.41***; 0.21***; 0.22***	0.5***; -0.04ns; 0.04ns	0.47***; -0.04ns; 0.01ns	0.29***; 0.38***; 0.28***	-0.38***; -0.42***; -0.52***	0.22***; 0.38***; 0.32***	0.52***; 0.22***; 0.45***	-0.08ns; -0.01ns; -0.01ns
gmax_Narea_mol.g.1.s.1	-0.01ns; -0.33***; -0.38***	0.16**; -0.15**; -0.07ns	0.69***; 0.69***; 0.67***	0.72***; 0.68***; 0.67***	0.26***; 0.08ns; 0.09ns	-0.09ns; -0.42***; -0.51***	0.42***; 0.24***; 0.57***	-0.32***; -0.49***; -0.57***	-0.3***; -0.29***; -0.58***	-0.02ns; -0.02ns; -0.06ns	0.01ns; -0.01ns; -0.02ns	0.04ns; -0.02ns; 0.01ns	-0.35***; -0.53***; -0.64***	-0.01ns; -0.02ns; -0.08ns	-0.1ns; -0.02ns; 0.07ns	-0.11ns; -0.12ns; -0.14*	-0.03ns; -0.06ns; 0.09ns	-0.27***; -0.11ns; -0.33***	0.02ns; 0.03ns; -0.03ns	-0.04ns; -0.09ns; -0.12ns	-0.02ns; -0.19**; -0.16**	-0.03ns; -0.14*; -0.14*	-0.32***; -0.55***; -0.63***	0.12*; 0.07ns; 0.17**	-0.35***; -0.53***; -0.64***	-0.12*; -0.23***; -0.19**	0.02ns; -0.11ns; 0ns	-0.01ns; 0.03ns; 0.01ns	0.27***; 0.36***; 0.49***	-0.06ns; -0.09ns; -0.17**	0.03ns; -0.06ns; 0ns	0.18***; 0.26***; 0.34***	-0.15**; -0.1ns; -0.3***	-0.09ns; -0.07ns; -0.12*	0.15**; 0.14*; 0.3***	-0.03ns; -0.17**; -0.13*	-0.23***; -0.12*; -0.41***	-0.09ns; 0.11ns; -0.11ns	-0.05ns; -0.05ns; -0.14*	-0.16**; -0.07ns; -0.32***	0.18***; 0.16**; 0.29***	-0.12*; -0.21***; -0.22***	-0.19***; 0.08ns; 0.01ns	-0.15**; 0.02ns; 0.12ns	-0.31***; -0.37***; -0.41***	0.25***; 0.4***; 0.39***	0ns; -0.19***; -0.19**	-0.26***; -0.4***; -0.52***	0.37***; 0.42***; 0.49***
HmaxTRY_m	-0.01ns; 0.3***; 0.05ns	-0.06ns; -0.1ns; -0.08ns	0.01ns; 0.11ns; 0.15*	0.03ns; 0.09ns; 0.12*	-0.2***; -0.18**; -0.26***	-0.07ns; -0.08ns; -0.21***	0.21***; 0.14*; 0.34***	0.02ns; 0.1ns; -0.02ns	0.02ns; 0.15**; -0.07ns	0ns; -0.02ns; 0.07ns	0.17**; 0.22***; 0.29***	-0.2***; -0.3***; -0.32***	-0.07ns; -0.04ns; -0.19**	-0.12*; -0.16**; -0.23***	-0.13*; -0.17**; -0.21**	0.17**; -0.07ns; 0ns	0.19***; -0.04ns; 0.04ns	0.05ns; 0.21**; -0.16*	-0.03ns; -0.05ns; 0.02ns	0.1ns; -0.08ns; 0.04ns	0.23***; 0.37***; 0.26***	0.01ns; 0.09ns; 0.04ns	-0.04ns; -0.14*; -0.16**	-0.11*; -0.26***; -0.18**	-0.11*; -0.07ns; -0.18**	-0.24***; -0.23***; -0.3***	-0.21***; -0.34***; -0.32***	-0.03ns; 0.01ns; -0.05ns	0.06ns; 0.04ns; 0.18**	-0.24***; -0.26***; -0.41***	-0.22***; -0.24***; -0.27***	0.14**; 0.12*; 0.34***	-0.35***; -0.22***; -0.52***	-0.14*; -0.11ns; -0.18**	-0.14**; -0.11ns; -0.12*	-0.21***; -0.25***; -0.36***	-0.12*; -0.06ns; -0.23***	-0.07ns; 0.1ns; -0.01ns	-0.09ns; -0.06ns; -0.21***	-0.23***; -0.12*; -0.35***	-0.06ns; -0.08ns; 0.03ns	-0.11*; -0.1ns; -0.23***	-0.12*; 0.05ns; -0.01ns	-0.16**; 0.01ns; -0.04ns	-0.01ns; -0.02ns; 0.02ns	0.08ns; 0.03ns; 0.18**	0.08ns; 0.27***; 0.17**	-0.18**; -0.26***; -0.38***	0.06ns; 0.16**; 0.18**
SeedMassTRY_mg	-0.27***; -0.09ns; -0.23***	-0.12*; -0.05ns; -0.1ns	0.23***; 0.16*; 0.36***	0.22***; 0.17**; 0.34***	0.02ns; -0.03ns; 0.03ns	-0.26***; -0.15*; -0.27***	0.35***; 0.2***; 0.45***	-0.02ns; -0.13*; -0.06ns	-0.11*; -0.07ns; -0.14*	0.18**; -0.09ns; 0.03ns	0.24***; -0.02ns; 0.25***	-0.23***; 0.02ns; -0.28***	-0.19***; -0.14*; -0.24***	-0.14*; 0.12*; -0.13*	-0.09ns; 0.01ns; -0.11ns	0ns; 0.01ns; 0.07ns	-0.03ns; 0.02ns; 0.06ns	-0.05ns; -0.04ns; -0.04ns	0.25***; 0.06ns; 0.21***	-0.07ns; 0.15ns; -0.03ns	0.23***; 0.05ns; 0.23***	-0.1ns; -0.12*; -0.06ns	0ns; -0.11ns; -0.05ns	0.02ns; 0.05ns; 0.04ns	-0.11*; -0.11ns; -0.17**	-0.15**; -0.02ns; -0.2***	-0.15**; -0.03ns; -0.19**	-0.03ns; 0.34***; 0.07ns	0.12*; 0.17**; 0.19**	-0.23***; -0.06ns; -0.32***	-0.12*; -0.01ns; -0.1ns	0.12*; -0.01ns; 0.2***	-0.18**; -0.05ns; -0.32***	-0.15**; -0.05ns; -0.19**	-0.02ns; -0.05ns; -0.04ns	-0.16**; -0.06ns; -0.22***	-0.17**; -0.03ns; -0.21***	-0.18**; 0.11ns; -0.07ns	-0.15**; 0.02ns; -0.14*	-0.19***; -0.03ns; -0.24***	-0.04ns; -0.08ns; -0.09ns	-0.1ns; 0.32***; -0.1ns	-0.09ns; 0.06ns; 0.07ns	-0.11*; -0.05ns; -0.01ns	-0.04ns; -0.05ns; 0.01ns	0.17**; 0.08ns; 0.24***	-0.03ns; -0.11ns; -0.05ns	-0.18**; 0ns; -0.26***	0.06ns; 0.07ns; 0.05ns
GSAI	-0.13*; -0.02ns; -0.1ns	-0.21***; -0.07ns; -0.12*	-0.05ns; -0.03ns; 0.07ns	-0.14*; -0.05ns; 0.02ns	-0.23***; -0.03ns; -0.17**	-0.38***; -0.3***; -0.45***	0.25***; -0.01ns; 0.32***	-0.36***; -0.14**; -0.31***	-0.33***; -0.13*; -0.33***	-0.07ns; 0.04ns; -0.04ns	-0.02ns; 0.01ns; 0.04ns	-0.06ns; -0.06ns; -0.07ns	-0.41***; -0.21***; -0.38***	-0.15**; -0.02ns; -0.08ns	-0.28***; -0.07ns; -0.09ns	-0.29***; -0.09ns; -0.28***	-0.16**; -0.05ns; -0.13*	-0.15**; 0.2**; 0.04ns	-0.12*; -0.14*; -0.11ns	0.13*; -0.09ns; -0.18ns	0.09ns; -0.01ns; 0.04ns	0.04ns; 0.07ns; 0.07ns	-0.49***; -0.29***; -0.47***	-0.06ns; -0.1ns; -0.07ns	-0.4***; -0.07ns; -0.29***	-0.21***; 0.07ns; -0.05ns	-0.26***; -0.12*; -0.17**	-0.25***; 0ns; -0.06ns	0.03ns; -0.03ns; 0.16**	-0.35***; -0.06ns; -0.31***	-0.46***; -0.25***; -0.36***	0.11*; 0.06ns; 0.2***	-0.39***; -0.14*; -0.31***	-0.27***; -0.11*; -0.19***	-0.08ns; -0.04ns; 0.06ns	-0.47***; -0.18**; -0.35***	-0.31***; -0.05ns; -0.2***	-0.22***; -0.04ns; -0.12*	-0.36***; -0.13*; -0.27***	-0.39***; -0.07ns; -0.3***	0.06ns; -0.04ns; 0.08ns	-0.21***; 0.29***; -0.04ns	-0.17**; -0.03ns; -0.02ns	-0.19***; -0.12ns; -0.14ns	-0.26***; -0.13*; -0.17**	-0.02ns; -0.1ns; 0.02ns	-0.03ns; 0.12*; 0.08ns	-0.24***; 0.26***; -0.1ns	0.42***; 0.37***; 0.49***
GSPET	-0.3***; -0.22***; -0.23***	-0.2***; -0.07ns; -0.11ns	0.13*; 0.37***; 0.29***	0.07ns; 0.37***; 0.26***	-0.2***; -0.11*; -0.13*	-0.48***; -0.38***; -0.42***	0.45***; 0.26***; 0.45***	-0.33***; -0.21***; -0.29***	-0.48***; -0.24***; -0.42***	0.19***; 0.21***; 0.25***	0.01ns; 0.03ns; 0.07ns	-0.08ns; -0.13*; -0.09ns	-0.42***; -0.3***; -0.38***	-0.29***; -0.21***; -0.26***	-0.22***; -0.16**; -0.13*	-0.19***; -0.12ns; -0.15*	-0.06ns; -0.07ns; -0.01ns	-0.28***; -0.1ns; -0.17**	0.02ns; 0.04ns; 0.05ns	-0.23***; -0.51***; -0.61***	-0.18**; -0.1ns; -0.06ns	-0.15**; -0.07ns; -0.05ns	-0.47***; -0.37***; -0.4***	-0.08ns; -0.08ns; -0.01ns	-0.57***; -0.41***; -0.49***	-0.43***; -0.31***; -0.35***	-0.29***; -0.29***; -0.27***	-0.22***; -0.04ns; -0.13*	0.41***; 0.34***; 0.54***	-0.59***; -0.35***; -0.55***	-0.25***; -0.2***; -0.21***	0.17**; 0.12*; 0.3***	-0.49***; -0.19***; -0.4***	-0.3***; -0.09ns; -0.17**	0.15**; 0.16**; 0.28***	-0.31***; -0.19***; -0.25***	-0.66***; -0.12*; -0.59***	-0.27***; 0.1ns; -0.12*	-0.45***; -0.24***; -0.38***	-0.54***; -0.08ns; -0.46***	0.19***; 0.16**; 0.34***	-0.55***; -0.35***; -0.5***	-0.63***; -0.01ns; -0.03ns	-0.56***; 0.07ns; 0.25***	-0.27***; -0.08ns; -0.1ns	0.27***; 0.41***; 0.4***	-0.05ns; -0.03ns; 0ns	-0.58***; -0.54***; -0.59***	0.41***; 0.41***; 0.43***
GSppt	-0.23***; -0.15**; -0.19**	-0.17**; -0.08ns; -0.12*	0.06ns; 0.21***; 0.2***	0.01ns; 0.2***; 0.16**	-0.23***; -0.11ns; -0.18**	-0.49***; -0.46***; -0.53***	0.39***; 0.17**; 0.47***	-0.31***; -0.25***; -0.36***	-0.43***; -0.24***; -0.44***	0.15**; 0.16**; 0.1ns	-0.01ns; 0.02ns; 0.06ns	-0.07ns; -0.11ns; -0.09ns	-0.38***; -0.34***; -0.45***	-0.31***; -0.16**; -0.21***	-0.33***; -0.14*; -0.12ns	-0.26***; -0.14*; -0.26***	-0.15**; -0.09ns; -0.09ns	-0.31***; 0.07ns; -0.1ns	-0.09ns; -0.09ns; -0.03ns	-0.1ns; -0.5***; -0.54***	0.06ns; -0.1ns; -0.01ns	-0.04ns; 0.01ns; 0.02ns	-0.5***; -0.47***; -0.52***	-0.14**; -0.12*; -0.06ns	-0.5***; -0.34***; -0.46***	-0.36***; -0.18**; -0.24***	-0.34***; -0.29***; -0.27***	-0.27***; -0.06ns; -0.12*	0.21***; 0.19***; 0.41***	-0.55***; -0.26***; -0.49***	-0.41***; -0.32***; -0.34***	0.12*; 0.12*; 0.29***	-0.35***; -0.2***; -0.38***	-0.36***; -0.15**; -0.22***	-0.02ns; 0.04ns; 0.18**	-0.49***; -0.28***; -0.37***	-0.56***; -0.11ns; -0.45***	-0.29***; 0.03ns; -0.15**	-0.41***; -0.24***; -0.37***	-0.51***; -0.12*; -0.45***	0.08ns; 0.1ns; 0.21***	-0.39***; -0.03ns; -0.3***	-0.35***; -0.04ns; -0.06ns	-0.32***; -0.01ns; 0.1ns	-0.28***; -0.14*; -0.17**	0.12*; 0.21***; 0.24***	0.05ns; 0.07ns; 0.06ns	-0.38***; -0.17**; -0.38***	0.51***; 0.55***; 0.56***
GStavg	-0.25***; -0.2***; -0.2***	-0.05ns; 0.03ns; 0.04ns	0.2***; 0.36***; 0.3***	0.2***; 0.4***; 0.33***	-0.13*; -0.09ns; -0.07ns	-0.38***; -0.29***; -0.3***	0.47***; 0.24***; 0.43***	-0.24***; -0.15**; -0.17**	-0.37***; -0.14**; -0.28***	0.17**; 0.21***; 0.2***	0.01ns; 0.03ns; 0.05ns	-0.05ns; -0.09ns; -0.04ns	-0.3***; -0.18**; -0.21***	-0.28***; -0.2***; -0.26***	-0.2***; -0.14*; -0.11ns	-0.11ns; -0.11ns; -0.04ns	-0.03ns; -0.09ns; 0ns	-0.31***; -0.18**; -0.36***	0.09ns; 0.11*; 0.12*	-0.19***; -0.46***; -0.58***	-0.09ns; -0.08ns; -0.03ns	-0.16**; -0.11*; -0.12*	-0.33***; -0.28***; -0.27***	-0.06ns; -0.13*; -0.05ns	-0.5***; -0.36***; -0.43***	-0.42***; -0.39***; -0.41***	-0.26***; -0.26***; -0.24***	-0.15**; -0.02ns; -0.11ns	0.47***; 0.34***; 0.53***	-0.47***; -0.25***; -0.4***	-0.08ns; -0.03ns; -0.02ns	0.13*; 0.07ns; 0.17**	-0.32***; 0.02ns; -0.12*	-0.24***; -0.05ns; -0.14*	0.13*; 0.11ns; 0.18**	-0.16**; -0.08ns; -0.07ns	-0.61***; -0.06ns; -0.56***	-0.18***; 0.11*; -0.09ns	-0.29***; -0.08ns; -0.22***	-0.43***; -0.04ns; -0.35***	0.18**; 0.15**; 0.25***	-0.51***; -0.38***; -0.51***	-0.58***; -0.01ns; -0.06ns	-0.5***; 0.12ns; 0.22**	-0.22***; -0.07ns; -0.07ns	0.4***; 0.41***; 0.44***	0.01ns; -0.04ns; 0.02ns	-0.53***; -0.55***; -0.57***	0.37***; 0.32***; 0.32***
AI_mean	-0.1ns; -0.04ns; -0.1ns	-0.21***; -0.19***; -0.21***	-0.05ns; 0.04ns; 0.11ns	-0.11*; -0.02ns; 0.03ns	-0.32***; -0.13*; -0.28***	-0.49***; -0.46***; -0.56***	0.37***; 0.11*; 0.42***	-0.39***; -0.29***; -0.38***	-0.5***; -0.25***; -0.47***	0.12*; 0.13*; 0.21***	-0.03ns; -0.03ns; 0.07ns	-0.05ns; -0.08ns; -0.09ns	-0.45***; -0.38***; -0.48***	-0.34***; -0.27***; -0.26***	-0.34***; -0.15*; -0.17**	-0.23***; -0.16*; -0.26***	-0.07ns; -0.08ns; -0.04ns	-0.28***; 0.18**; -0.13*	-0.25***; -0.22***; -0.16**	0.32***; -0.55***; -0.44***	0.03ns; -0.07ns; 0.04ns	0.01ns; 0.07ns; 0.14*	-0.57***; -0.54***; -0.58***	-0.11ns; -0.11ns; -0.09ns	-0.53***; -0.44***; -0.52***	-0.33***; -0.21***; -0.29***	-0.32***; -0.27***; -0.31***	-0.35***; -0.17**; -0.26***	0.17**; 0.22***; 0.35***	-0.52***; -0.3***; -0.51***	-0.38***; -0.33***; -0.36***	0.27***; 0.35***; 0.51***	-0.5***; -0.25***; -0.57***	-0.31***; -0.06ns; -0.15**	-0.03ns; 0.01ns; 0.13*	-0.51***; -0.33***; -0.46***	-0.47***; -0.12*; -0.45***	-0.23***; 0.02ns; -0.03ns	-0.45***; -0.27***; -0.4***	-0.49***; -0.16**; -0.49***	0.27***; 0.41***; 0.51***	-0.36***; -0.1ns; -0.32***	-0.35***; -0.05ns; -0.14ns	-0.26***; 0.03ns; 0.34***	-0.31***; -0.19***; -0.19***	0.08ns; 0.18**; 0.27***	0ns; 0.09ns; 0.11ns	-0.48***; -0.31***; -0.47***	0.54***; 0.62***; 0.62***
PET_mean	0.04ns; 0.01ns; -0.01ns	0.22***; 0.14*; 0.15**	0.1ns; -0.08ns; -0.02ns	0.16**; -0.04ns; 0.03ns	0.33***; 0.13*; 0.29***	0.45***; 0.53***; 0.5***	-0.37***; -0.17**; -0.42***	0.4***; 0.29***; 0.36***	0.51***; 0.19***; 0.44***	-0.06ns; -0.11*; -0.26***	0.05ns; -0.01ns; -0.04ns	0.02ns; 0.1ns; 0.04ns	0.46***; 0.37***; 0.42***	0.34***; 0.32***; 0.29***	0.24***; 0.09ns; 0.1ns	0.11ns; 0.21***; 0.21***	-0.07ns; 0.15*; 0ns	0.23***; 0ns; 0.27***	0.19***; 0.12*; 0.09ns	-0.35***; 0.39***; 0.08ns	0.01ns; -0.03ns; -0.04ns	-0.04ns; -0.13*; -0.11*	0.53***; 0.57***; 0.53***	0.01ns; 0.1ns; 0.07ns	0.54***; 0.51***; 0.51***	0.32***; 0.28***; 0.3***	0.24***; 0.34***; 0.25***	0.32***; 0.16**; 0.24***	-0.31***; -0.26***; -0.41***	0.41***; 0.25***; 0.38***	0.18**; 0.18**; 0.17**	-0.42***; -0.36***; -0.54***	0.57***; 0.06ns; 0.43***	0.18***; -0.04ns; 0.06ns	-0.02ns; -0.03ns; -0.09ns	0.4***; 0.26***; 0.36***	0.4***; 0.06ns; 0.37***	0.13*; -0.06ns; 0.01ns	0.37***; 0.13*; 0.29***	0.44***; 0.14*; 0.41***	-0.33***; -0.39***; -0.47***	0.38***; 0.25***; 0.34***	0.46***; 0.02ns; 0.14ns	0.33***; -0.21**; -0.41***	0.3***; 0.2***; 0.19***	-0.19***; -0.29***; -0.3***	0.04ns; -0.08ns; -0.08ns	0.59***; 0.4***; 0.52***	-0.49***; -0.6***; -0.57***
MAT_mean	-0.07ns; -0.16**; -0.16**	0.2***; 0.19***; 0.11*	0.14*; 0.17**; 0.22***	0.18**; 0.26***; 0.27***	0.21***; 0.05ns; 0.13*	0.23***; 0.21***; 0.08ns	-0.07ns; 0.01ns; 0.09ns	0.22***; 0.12*; 0.01ns	0.24***; 0.08ns; 0.01ns	0.07ns; 0.03ns; -0.06ns	0ns; -0.01ns; -0.03ns	0.07ns; 0.07ns; 0.04ns	0.26***; 0.2***; 0.03ns	0.17**; 0.16**; 0ns	0.2***; 0ns; -0.01ns	0.03ns; 0.06ns; -0.01ns	-0.08ns; 0.02ns; -0.1ns	0.01ns; -0.06ns; 0.07ns	0.24***; 0.22***; 0.13*	-0.48***; -0.13ns; -0.33***	-0.1ns; -0.06ns; -0.09ns	-0.22***; -0.2***; -0.15**	0.28***; 0.25***; 0.07ns	0.02ns; -0.03ns; 0.08ns	0.2***; 0.2***; 0.04ns	0.11*; 0.01ns; 0.06ns	0.14**; 0.09ns; 0.04ns	0.25***; 0.12*; 0.12*	0.15**; -0.02ns; -0.04ns	0.13*; 0.08ns; -0.02ns	0.14**; 0.11ns; 0.03ns	-0.25***; -0.31***; -0.27***	0.42***; 0.18**; 0.17**	0.05ns; -0.12*; -0.13*	0.07ns; 0.03ns; 0.14*	0.25***; 0.16**; 0.13*	-0.03ns; 0.04ns; 0ns	0.02ns; 0.01ns; -0.04ns	0.2***; 0.1ns; 0.06ns	0.13*; 0.09ns; 0.06ns	-0.22***; -0.29***; -0.08ns	0.11ns; 0.02ns; -0.02ns	-0.05ns; 0.01ns; -0.01ns	-0.13*; -0.09ns; -0.05ns	0.18***; 0.07ns; -0.1ns	0.12*; -0.01ns; -0.01ns	0.04ns; -0.07ns; -0.1ns	0.2***; 0.07ns; 0.11ns	-0.18**; -0.18**; 0.03ns
MAP_mean	-0.12*; -0.07ns; -0.13*	-0.18***; -0.19**; -0.21***	0ns; 0.1ns; 0.14*	-0.04ns; 0.05ns; 0.06ns	-0.28***; -0.11ns; -0.26***	-0.43***; -0.48***; -0.54***	0.27***; 0.11*; 0.39***	-0.28***; -0.26***; -0.36***	-0.4***; -0.24***; -0.44***	0.13*; 0.12*; 0.17**	-0.02ns; -0.01ns; 0.07ns	-0.05ns; -0.09ns; -0.09ns	-0.33***; -0.37***; -0.45***	-0.31***; -0.24***; -0.23***	-0.36***; -0.14*; -0.17**	-0.22***; -0.16*; -0.26***	-0.1ns; -0.08ns; -0.05ns	-0.29***; 0.17**; -0.09ns	-0.26***; -0.23***; -0.17**	0.07ns; -0.56***; -0.55***	-0.02ns; -0.04ns; 0.04ns	0.04ns; 0.09ns; 0.13*	-0.49***; -0.53***; -0.56***	-0.17**; -0.1ns; -0.09ns	-0.47***; -0.42***; -0.48***	-0.36***; -0.17**; -0.26***	-0.36***; -0.3***; -0.31***	-0.38***; -0.16**; -0.24***	0.07ns; 0.18**; 0.29***	-0.54***; -0.3***; -0.51***	-0.45***; -0.37***; -0.39***	0.19***; 0.27***; 0.45***	-0.38***; -0.27***; -0.54***	-0.34***; -0.1ns; -0.18**	-0.1ns; 0.01ns; 0.12*	-0.55***; -0.33***; -0.46***	-0.52***; -0.12*; -0.44***	-0.21***; 0.03ns; -0.03ns	-0.45***; -0.27***; -0.39***	-0.49***; -0.16**; -0.48***	0.27***; 0.34***; 0.48***	-0.36***; -0.06ns; -0.28***	-0.27***; -0.06ns; -0.11ns	-0.22***; -0.01ns; 0.23**	-0.22***; -0.18**; -0.19**	0.05ns; 0.17**; 0.24***	0.06ns; 0.11*; 0.11ns	-0.39***; -0.21***; -0.41***	0.46***; 0.63***; 0.61***
[truncated: 18 more columns]

[truncated: 8 more sheets: Table_S10, Table_S11, Table_S12, Table_S13, Table_S14, Table_S15, Table_S16, Table_S17]
