# Supplementary material
Source: Research Square preprint supplement (doi:10.21203/rs.3.rs-9188810/v1)
Supplement: Supplementary file 1 [file f6d6ae14f7e6c29e6f3aec51.docx]

**Supporting Information:**

**Priorities of woody species trait-climate associations at continental scale**

**Authors:** Nidhi Vinod1, Camila D. Medeiros1,2, Marvin Browne1,3, Anna Ongjoco1, Hannes P. T. De Deurwaerder4, Joseph Zailaa5, Christian Henry1, Santiago Trueba6, Norbert Kunert7, KC Cushman8, Jennifer A. Franklin9, N. Michele Holbrook10, David Orwig10, Sean M. McMahon11, Jess Shue11,Grace P. John12, Daniel J. Johnson13, Nathan J. B. Kraft1, James A. Lutz14, Rodrigo Méndez Alonzo15, Anna T. Trugman16, Jeffrey D. Wood17, Kristina Anderson-Teixeira18,19, Matteo Detto20, Lawren Sack1

**Table of Contents**

| **Figure S1.** | Relationship between species scores on principal component axes representing climate variables, i.e., Climate PC1 (a) and Climate PC2 (b) and latitude | 1 |
| --- | --- | --- |
| **Figure S2.** | Mean correlation coefficients (*r* values) ± standard error) for significant associations of traits with site climates, for 328 species’ site combinations sampled from 16 ecosystems of the continental USA and northern Mexico | 2 |
| **Methods S1.** | Methods for trait measurement | 4 |


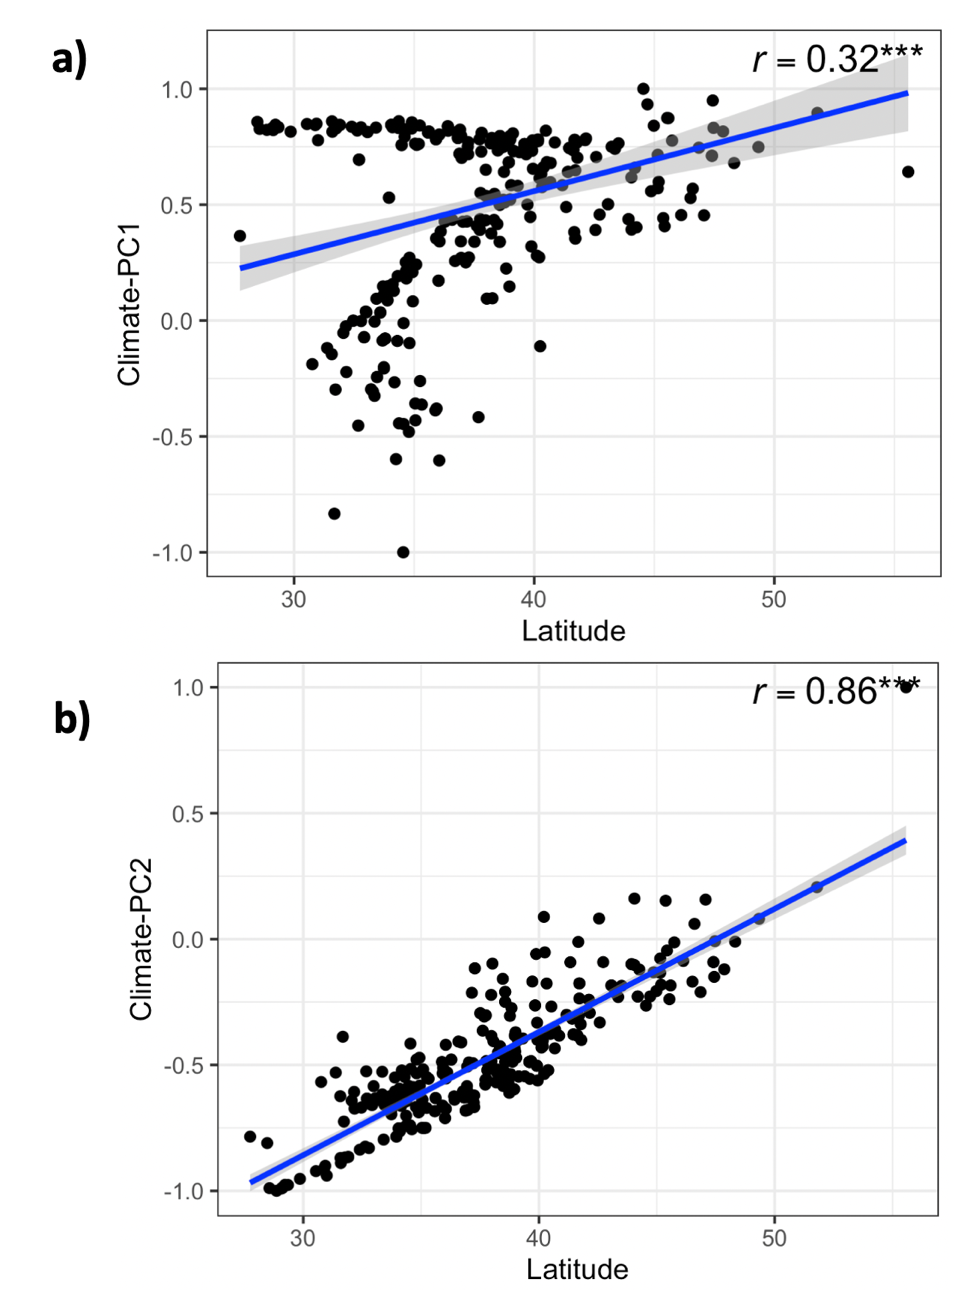


**Figure S1.** a) Relationship between species scores on principal component axes representing climate variables, i.e., Climate PC1 (a) and Climate PC2 (b) and latitude for 328 species-site combinations representing 246 unique species across the continental USA and northern Mexico. The blue lines represent fitted linear regressions with 95% confidence interval (gray band).


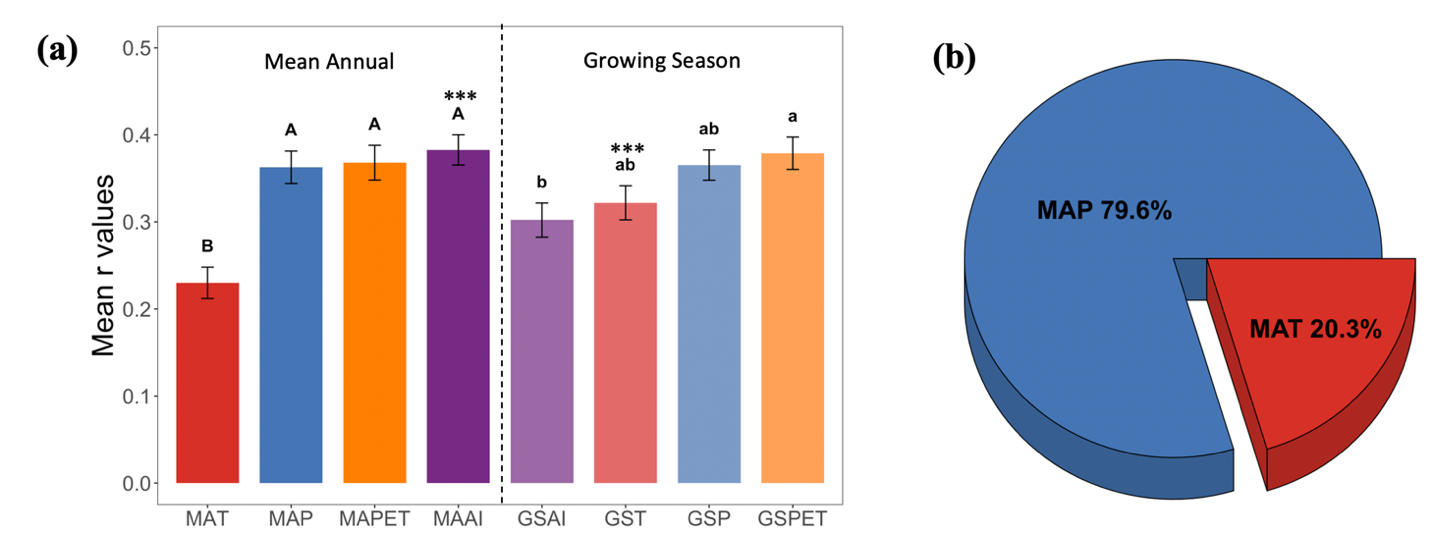


**Figure S2.** Mean correlation coefficients (*r* values) ± standard error) for significant associations of traits with site climates, for 328 species’ site combinations sampled from 16 ecosystems of the continental USA and northern Mexico. Mean annual and growing season climate variables for: temperature (MAT and GST, respectively), precipitation (MAP and GSP), potential evapotranspiration (MAPET and GSPET), and aridity (MAAI and GSAI). Letters above each bar indicate significant differences among mean annual or growing season mean variables based on Tukey comparisons, such that; bars with different letters within mean annual or growing season mean variables are significantly different at *P* < 0.05 (Table S11). Asterisks above the bars indicate significant differences between growing season and mean annual values (ANOVAs; p<0.05; Table S11).

**Methods S1: Methods for trait measurements**

***Leaf epidermal morphology traits***

For epidermal morphology traits, up to 10 leaves (depending on the leaf size; not all were needed, but the number allowed us to repeat the procedure for hard to work with leaves) were sampled per individual and fixed in FAA 37% (48% ethanol: 10% formalin: 5% glacial acetic acid) for at least two days.

We quantified six epidermal morphology traits on micrographs taken of clear nail varnish impressions of the middle-third section of the abaxial and adaxial surfaces (Medeiros et al. 2019) of one representative leaf per individual, using the software ImageJ (Schneider et al. 2012). From each micrograph, we manually measured: the stomatal and trichome densities (*d* and *t*, respectively), stomatal area (*s*), and epidermal pavement cell area (*e*), and calculated the stomatal index (*i*, the number of stomata divided by the sum of epidermal pavement cells and stomata) and the maximum theoretical stomatal conductance (*g*max) (Sack et al. 2006; Franks and Farquhar 2007; Sack and Buckley 2016; Medeiros et al. 2019; Baird et al. 2024). To determine whole leaf-level trait values, for cell dimensions, we calculated the arithmetic mean of the abaxial and adaxial values, and for cell densities and *g*max, we calculated the sum of abaxial and adaxial values. The stomatal ratio (SRpropAd) was calculated as the abaxial *d* divided by the sum of the abaxial and adaxial *d* for each leaf and used to classify the individuals according to their stomatal distribution into hypostomatous (SRpropAd = 0), hyperstomatous (SRpropAd = 1) or amphistomatous (0 < SRpropAd < 1 ) (Muir 2015, 2018).

***Leaf structure traits***

For the 12 leaf economics and structure traits, we measured three leaves of small, medium and large sizes per individual. First, we separated the leaf lamina from the petiole using sharp razor blades. The saturated mass of the leaf lamina was measured using an analytical balance (0.01 mg) and the leaf thickness (LT), which represents the average of three measurements taken at the base, middle and top thirds of each saturated leaf, was measured using digital calipers (0.01 mm). The leaf area (LA) was measured using a flatbed scanner and analyzed with the software ImageJ (Schneider et al. 2012). After scanning, leaves were oven-dried at 70º for 72 h before measurement of dry mass. The leaf mass per area (LMA) was calculated as lamina dry mass divided by LA (Pérez-Harguindeguy et al. 2013). The leaf density (LD) was calculated as LMA divided by LT; saturated water content (SWC) as saturated mass minus dry mass divided by dry mass; saturated water mass per area (SWMA) as the saturated mass minus dry mass divided by saturated area; leaf dry matter content (LDMC) as dry mass divided by saturated mass; and percentage loss in area and thickness after drying (PLAdry and PLTHdry, respectively) as the percent decline in area from saturated to dry leaves (Witkowski and Lamont 1991; Ogburn and Edwards 2012; Pérez-Harguindeguy et al. 2013; Medeiros et al. 2019).

The saturated mass of the petiole was measured using an analytical balance and the length and diameter of its vertical and horizontal axes at the base, middle and top, were measured using digital calipers. The petiole area (PA) was calculated as: , and the petiole mass per area (PMA) was calculated as the as petiole dry mass divided by the PA. We calculated the ratio of petiole area to leaf area (PA:LA), petiole area to leaf dry mass (PA:dry mass).

***Stem structure and allocation traits***

We quantified two wood economics and structure traits. The wood density (WD) was measured from 5-cm branch segments after bark removal using the water displacement method (Pérez-Harguindeguy et al. 2013). Branch segments were immersed in water and the mass of the displaced water was recorded; branch segments were then oven-dried at 70º for 120 h and their dry mass was measured. WD was calculated as the segment dry mass divided by the mass of displaced water. From one saturated terminal branchlet per individual, the Huber value (HV), was calculated as the sapwood to leaf area ratio. The sapwood area (SA; m2) was calculated as the area of a circle, , where *r* = the radius of the stem cross-section after the bark was removed, and the leaf area as the sum of the areas of the leaves attached to the branchlet (SL; cm2) (Zuleta et al. 2022). We calculated the bark thickness (BT) as the difference in stem cross-sectional diameter before (Dwb) and after (Dwob) bark removal divided by 2.

***Leaf*** ***elemental and isotopic composition***

We quantified 26 leaf composition traits from a mixture of 10-20 ground oven-dried leaves per individual. The concentrations of elemental leaf nitrogen and carbon per mass (Nmass and Cmass, respectively) and carbon isotope discrimination (Δ13C) were determined by continuous flow dual isotope analysis (Center for Stable Isotope Biogeochemistry, University of California, Berkeley; CHNOS Elemental Analyzer interfaced to an IsoPrime100 mass spectrometer) (Fry et al. 1996; Kaklamanos et al. 2020).  The concentration of N was converted from mass to area basis (Narea) by multiplying by LMA. The carbon isotope discrimination (Δ13C; in parts per thousand, ‰) was calculated following Farquhar and Richards (Farquhar and Richards 1984), assuming Δ13Cair of -8 ‰ (NOAA Global Monitoring Laboratory 2018) for the samples collected before 2019 and -8.5 ‰ for those collected between 2021 and 2023 (Fiorella et al. 2021). The concentrations of four macronutrients (potassium, calcium, phosphorus and magnesium) and 15 micronutrients (iron, boron, manganese, sodium, zinc, copper, molybdenum, cobalt, aluminum, arsenic, cadmium, rubidium, strontium, selenium and nickel) per leaf mass were determined using high throughput elemental profiling [ionomics (Salt et al. 2008)] by the USDA-ARS/Danforth Center Ionomics facility at the Donald Danforth Plant Science Center. The total chlorophyll concentration per leaf area was measured using a SPAD meter (Chl) [SPAD-502, Konica Minolta, Japan; SPAD units; (Monje and Bugbee 1992)]. We also calculated the ratios between leaf N and P concentrations (N:P) and C and N concentrations (C:N).

***Plant hydraulic traits***

We quantified three hydraulic traits. The turgor loss point (πtlp) was measured from two leaves per studied individual. We used vapor-pressure osmometers (Vapro 5520 and 5600, Wescor, US) to obtain the osmotic concentration of the leaves and used calibration equations to estimate πtlp (Bartlett et al. 2012).

For three to seven of the most abundant species at eight sites (34 in total), we measured the leaf hydraulic conductance at leaf water potential of -0.1 MPa (K0.1) and the water potential at 80% decline in K0.1 (YK0.1_80). We used the pressure-drop hydraulics flowmeter, a low-cost and portable alternative to the evaporative flux method, for the determination of leaf hydraulic conductance (Scoffoni et al. 2008, 2011; Melcher et al. 2012). For angiosperms we measured individual leaves, and for gymnosperms we measured shoot tips with many needles. The excised leaves were connected to calibrated resistance tubing and, under high light conditions, the pressure difference across a manifold connecting a source of water and the leaf sample was determined. We calculated the leaf hydraulic conductance as the light-acclimated steady-state transpiration flow rate of excised leaves divided by the leaf water potential (Scoffoni et al. 2008). The leaf water potentials were determined using a Scholander pressure chamber (0.001 MPa resolution; Plant Moisture Stress model 1000; PMS Instruments Co). We present K0.1 in terms of LA (mmol.m-2.s-1.MPa-1). For Angiosperms, the LA was determined following the same procedure described in the “Leaf economics and structure traits”section; for Gymnosperms, it was estimated as the dry mass of the needles/ LMA. We built vulnerability curves from the paired hydraulic conductance and water potential measurements made on increasingly dehydrated leaves from which we estimated the K0.1 and the water potential of 80% decline of K0.1 (YK0.1_80). We estimated the linear, logistic, sigmoidal and exponential fits for the vulnerability curve of each species using the *anneal* function of the ‘likelihood*’* package [version 1.8 (Murphy 2022)]. The model with the lowest AICc (Akaike Information Criterion corrected for small sample sizes) score for each species was chosen as the best-fit to estimate hydraulic parameters. If the AICc of the best-fit model was ≥ 2 below the other models, we visually chose the model which fit more points across water potentials (Burnham and Anderson 2004).

***Photosynthesis traits***

We quantified six photosynthesis traits. For 1-12 of the most abundant species at six sites, we also estimated the Vcmax area and Jmax area using portable photosynthesis systems (LI-6400XT, LI-COR, Lincoln, NE, USA) to generate photosynthetic CO2-response curves (A-Ci curves) by measuring the net photosynthetic rate of a leaf at a series of concentrations of reference CO2 (400, 300, 200, 100, 75, 400, 400, 600, 900, 1200, 1500, and 1700 ppm) under a constant temperature (fixed at ambient conditions), photosynthetic flux density (1600 µmol m-2 s-1), and cuvette air flow rate (500 µmol s-1). We used the *fitaci* function of the ‘Plantecophys’ package [version 1.4 (Duursma 2015)] to fit A-Ci curves and estimate the corresponding values. For two additional sites, WFDP and RPFS, we compiled data for three species from published papers (49 species in total) (Pallardy et al. 2020; Gu et al. 2010). See Zhao et al 2026 for a detailed description (Zhao et al. 2024).

Based on nutrient composition, isotope ratio and stomatal data, we derived additional modelled trait values time-integrated photosynthetic assimilation per area (Aarea) and stomatal conductance (Gcleaf) (Franks et al. 2009; Domingues *et al.* 2010; Medeiros *et al.* 2019) and calculated the Gcleaf to Gmax ratio (Gcleaf:Gmax) (McElwain et al. 2016) and the Gmax to Narea ratio (Gmax:Narea) (Wright et al. 2001).

***Plant size***

The maximum height (Hmax) and seed mass (SM) were extracted from the TRY database (Kattge et al. 2020).

TRY Refs to add for Hmax and SM:
The following references should be cited, if all received data are used in resulting publications.

| Dataset | In text Citation | Reference |
| --- | --- | --- |
| Jasper Ridge Californian Woody Plants Database | (Ackerly and Cornwell 2007) | Ackerly, D. D. and W. K. Cornwell. 2007. A trait-based approach to community assembly: partitioning of species trait values into within- and among-community components. Ecology Letters 10:135-145. |
| Functional traits explaining variation in plant life history strategies | (Adler et al. 2014) | Adler PB, R Salguero-Gómez, A Compagnoni, JS Hsu, J Ray-Mukherjee, C Mbeau-Ache, M Franco (2014) Functional traits explain variation in plant life history strategies. PNAS 111 (2) 740-745. doi: 10.1073/pnas.1315179111 |
| Tundra Trait Team | (Bjorkman et al. 2018) | Bjorkman, AD, IH Myers-Smith, SC Elmendorf, S Normand, HJD Thomas, and 86 others (2018) Tundra Trait Team: a database of plant traits spanning the tundra biome. Global Ecology and Biogeography 27(12): 1402-1411. |
| Mt Baldy whole plant traits | (Blonder et al. 2018) | Blonder, B, Kapas, RE, Dalton, RM, Graae, BJ, Heiling, JM, Opedal, ØH. Microenvironment and functional‐trait context dependence predict alpine plant community dynamics. J Ecol. 2018; 106: 1323– 1337. https://doi.org/10.1111/1365-2745.12973 |
| BiolFlor Database | (Klotz, Kuhn & Durka 2002) | Briemle, G., Nitsche, S. & Nitsche, L. (2002): Nutzungswertzahlen für Gefäßpflanzen des Grünlandes. In: Klotz, S., Kühn, I. & Durka, W. [eds.]: BIOLFLOR - Eine Datenbank zu biologisch-ökologischen Merkmalen der Gefäßpflanzen in Deutschland. -Schriftenreihe für Vegetationskunde 38. Bundesamt für Naturschutz, Bonn. |
| Dataset on reproductive traits of Scandinavian alpine plants | (Bruun 2019) | Bruun, H. H. (2019) Dataset on reproductive traits of Scandinavian alpine plants. Data in Brief (accepted, DIB-D-19-01007R2) |
| Traits of US Desert Woody Plant Species | (Butterfield and Briggs 2011) | Butterfield, B.J. and J.M. Briggs. 2011. Regeneration niche differentiates functional strategies of desert woody plant species. Oecologia, 165:477-487. |
| Sheffield & Spain Woody Database | (Castro-Díez et al. 2000) | Castro-Diez, P., J. P. Puyravaud, and J. H. C. Cornelissen. 2000. Leaf structure and anatomy as related to leaf mass per area variation in seedlings of a wide range of woody plant species and types. Oecologia 124:476-486. |
| Sheffield & Spain Woody Database | (Castro-Díez et al. 1998) | Castro-Diez, P., J. P. Puyravaud, J. H. C. Cornelissen, and P. Villar-Salvador. 1998. Stem anatomy and relative growth rate in seedlings of a wide range of woody plant species and types. Oecologia 116:57-66. |
| Leaf and Whole-Plant Traits Database: Hydraulic and Gas Exchange Physiology, Anatomy, Venation Struc | (Cavender-Bares et al. 2007) | Cavender-Bares, J., L. Sack, and J. Savage. 2007. Atmospheric and soil drought reduce nocturnal conductance in live oaks. Tree Physiology 27:611-620. |
| Leaf and Whole-Plant Traits Database: Hydraulic and Gas Exchange Physiology, Anatomy, Venation Struc | (Choat et al. 2007) | Choat, B., L. Sack, and N. M. Holbrook. 2007. Diversity of hydraulic traits in nine Cordia species growing in tropical forests with contrasting precipitation. New Phytologist 175:686-698. |
| Leaf and Whole-Plant Traits Database: Hydraulic and Gas Exchange Physiology, Anatomy, Venation Struc | (Coomes et al. 2008) | Coomes, D. A., S. Heathcote, E. R. Godfrey, J. J. Shepherd, and L. Sack. 2008. Scaling of xylem vessels and veins within the leaves of oak species. Biology Letters 4:302-306. |
| Sheffield Database | (Cornelissen 1996) | Cornelissen(Cornelissen 1996), J. H. C. 1996. An experimental comparison of leaf decomposition rates in a wide range of temperate plant species and types. Journal of Ecology 84:573-582. |
| Sheffield Database | (Cornelissen et al. 2003) | Cornelissen, J. H. C., B. Cerabolini, P. Castro-Diez, P. Villar-Salvador, G. Montserrat-Marti, J. P. Puyravaud, M. Maestro, M. J. A. Werger, and R. Aerts. 2003. Functional traits of woody plants: correspondence of species rankings between field adults and laboratory-grown seedlings? Journal of Vegetation Science 14:311-322. |
| Sheffield & Spain Woody Database | (Cornelissen et al. 2003) | Cornelissen, J. H. C., B. Cerabolini, P. Castro-Diez, P. Villar-Salvador, G. Montserrat-Marti, J. P. Puyravaud, M. Maestro, M. J. A. Werger, and R. Aerts. 2003. Functional traits of woody plants: correspondence of species rankings between field adults and laboratory-grown seedlings? Journal of Vegetation Science 14:311-322. |
| Sheffield Database | (Cornelissen et al. 1999) | Cornelissen, J. H. C., N. Perez-Harguindeguy, S. Diaz, J. P. Grime, B. Marzano, M. Cabido, F. Vendramini, and B. Cerabolini. 1999. Leaf structure and defence control litter decomposition rate across species and life forms in regional floras on two continents. New Phytologist 143:191-200. |
| Sheffield Database | (Cornelissen et al. 1996) | Cornelissen, J. H. C., P. C. Diez, and R. Hunt. 1996. Seedling growth, allocation and leaf attributes in a wide range of woody plant species and types. Journal of Ecology 84:755-765. |
| Sheffield Database | (Cornelissen et al. 2001) | Cornelissen, J. H. C., R. Aerts, B. Cerabolini, M. J. A. Werger, and M. G. A. van der Heijden. 2001. Carbon cycling traits of plant species are linked with mycorrhizal strategy. Oecologia 129:611-619. |
| Sheffield & Spain Woody Database | (Cornelissen 1999) | Cornelissen, J.H.C. 1999. A triangular relationship between leaf size and seed size among woody species: allometry, ontogeny, ecology and taxonomy. Oecologia 118: 248-255. |
| Jasper Ridge Californian Woody Plants Database | (Cornwell and Ackerly 2009) | Cornwell, W. K. and D. D. Ackerly. 2009. Community assembly and shifts in plant trait distributions across an environmental gradient in coastal California. Ecological Monographs 79:109-126. |
| Jasper Ridge Californian Woody Plants Database | (Cornwell et al. 2006) | Cornwell, W. K., D. W. Schwilk, and D. D. Ackerly. 2006. A trait-based test for habitat filtering: Convex hull volume. Ecology 87:1465-1471. |
| Leaf and Whole-Plant Traits Database: Hydraulic and Gas Exchange Physiology, Anatomy, Venation Struc | (Cornwell et al. 2007) | Cornwell, W. K., R. Bhaskar, L. Sack, S. Cordell, and C. K. Lunch. 2007. Adjustment of structure and function of Hawaiian Metrosideros polymorpha at high vs. low precipitation. Functional Ecology 21:1063-1071. |
| Sheffield Database | (Diaz et al. 2004) | Díaz, S., J. G. Hodgson, K. Thompson, M. Cabido, J. H. C. Cornelissen, A. Jalili, G. Montserrat-Martí, J. P. Grime, F. Zarrinkamar, Y. Asri, S. R. Band, S. Basconcelo, P. Castro-Díez, G. Funes, B. Hamzehee, M. Khoshnevi, N. Pérez-Harguindeguy, M. C. Pérez-Rontomé, F. A. Shirvany, F. Vendramini, S. Yazdani, R. Abbas-Azimi, A. Bogaard, S. Boustani, M. Charles, M. Dehghan, L. de Torres-Espuny, V. Falczuk, J. Guerrero-Campo, A. Hynd, G. Jones, E. Kowsary, F. Kazemi-Saeed, M. Maestro-Martínez, A. Romo-Díez, S. Shaw, B. Siavash, P. Villar-Salvador, and M. R. Zak. 2004. The plant traits that drive ecosystems: Evidence from three continents. Journal of Vegetation Science 15:295-304. |
| Sheffield-Iran-Spain Database | (Diaz et al. 2004) | Díaz, S., J. G. Hodgson, K. Thompson, M. Cabido, J. H. C. Cornelissen, A. Jalili, G. Montserrat-Martí, J. P. Grime, F. Zarrinkamar, Y. Asri, S. R. Band, S. Basconcelo, P. Castro-Díez, G. Funes, B. Hamzehee, M. Khoshnevi, N. Pérez-Harguindeguy, M. C. Pérez-Rontomé, F. A. Shirvany, F. Vendramini, S. Yazdani, R. Abbas-Azimi, A. Bogaard, S. Boustani, M. Charles, M. Dehghan, L. de Torres-Espuny, V. Falczuk, J. Guerrero-Campo, A. Hynd, G. Jones, E. Kowsary, F. Kazemi-Saeed, M. Maestro-Martínez, A. Romo-Díez, S. Shaw, B. Siavash, P. Villar-Salvador, and M. R. Zak. 2004. The plant traits that drive ecosystems: Evidence from three continents. Journal of Vegetation Science 15:295-304. |
| Leaf and Whole-Plant Traits Database: Hydraulic and Gas Exchange Physiology, Anatomy, Venation Struc | (Dunbar-Co, Stephanie et al. 2009) | Dunbar-Co, S., M. J. Sporck, and L. Sack. 2009. Leaf Trait Diversification and Design in Seven Rare Taxa of the Hawaiian Plantago Radiation. International Journal of Plant Sciences 170:61-75. |
| BiolFlor Database | (Durka 2002) | Durka, W. (2002) Phylogenie der Farn- und Blütenpflanzen Deutschlands. - In: Klotz, S., Kühn, I. & Durka, W. [Hrsg.]: BIOLFLOR - Eine Datenbank zu biologisch-ökologischen Merkmalen der Gefäßpflanzen in Deutschland. - Schriftenreihe für Vegetationskunde 38: 75-91. Bundesamt für Naturschutz, Bonn. |
| BiolFlor Database | (Durka 2002) | Durka, W. (2002): Blüten- und Reproduktionsbiologie. In: Klotz, S., Kühn, I. & Durka, W. [eds.]: BIOLFLOR - Eine Datenbank zu biologisch-ökologischen Merkmalen der Gefäßpflanzen in Deutschland. - Schriftenreihe für Vegetationskunde 38: 133-175. Bundesamt für Naturschutz, Bonn. |
| BiolFlor Database | (Durka 2002) | Durka, W. (2002): Chromosomenzahlen, Ploidiestufen und DNA-Gehalte. In: Klotz, S., Kühn, I. & Durka, W. [eds.]: BIOLFLOR - Eine Datenbank zu biologisch-ökologischen Merkmalen der Gefäßpflanzen in Deutschland. - Schriftenreihe für Vegetationskunde 38. Bundesamt für Naturschutz, Bonn. |
| Ecological Flora of the British Isles | (Fitter and Peat 1994) | Fitter, A. H. and H. J. Peat 1994. The Ecological Flora Database. Journal of Ecology 82:415-425. |
| The VISTA Plant Trait Database | (Fortunel et al. 2009) | Fortunel, C., E. Garnier, R. Joffre, E. Kazakou, H. Quested, K. Grigulis, S. Lavorel, P. Ansquer, H. Castro, P. Cruz, J. Dolezal, O. Eriksson, H. Freitas, C. Golodets, C. Jouany, J. Kigel, M. Kleyer, V. Lehsten, J. Leps, T. Meier, R. Pakeman, M. Papadimitriou, V. P. Papanastasis, F. Quetier, M. Robson, M. Sternberg, J. P. Theau, A. Thebault, and M. Zarovali. 2009. Leaf traits capture the effects of land use changes and climate on litter decomposability of grasslands across Europe. Ecology 90:598-611. |
| The VISTA Plant Trait Database | (Garnier et al. 2007) | Garnier, E., S. Lavorel, P. Ansquer, H. Castro, P. Cruz, J. Dolezal, O. Eriksson, C. Fortunel, H. Freitas, C. Golodets, K. Grigulis, C. Jouany, E. Kazakou, J. Kigel, M. Kleyer, V. Lehsten, J. Leps, T. Meier, R. Pakeman, M. Papadimitriou, V. P. Papanastasis, H. Quested, F. Quetier, M. Robson, C. Roumet, G. Rusch, C. Skarpe, M. Sternberg, J.-P. Theau, A. Thebault, D. Vile, and M. P. Zarovali. 2007. Assessing the effects of land-use change on plant traits, communities and ecosystem functioning in grasslands: A standardized methodology and lessons from an application to 11 European sites. Annals of Botany 99:967-985. |
| PLANTSdata USDA | (Green, W 2009) | Green, W. 2009. USDA PLANTS Compilation, version 1, 09-02-02. (http://bricol.net/downloads/data/PLANTSdatabase/) NRCS: The PLANTS Database (http://plants.usda.gov, 1 Feb 2009). National Plant Data Center: Baton Rouge, LA 70874-74490 USA. |
| Leaf and Whole-Plant Traits Database: Hydraulic and Gas Exchange Physiology, Anatomy, Venation Struc | (Hao et al. 2010) | Hao, G. Y., L. Sack, A. Y. Wang, K. F. Cao, and G. Goldstein. 2010. Differentiation of leaf water flux and drought tolerance traits in hemiepiphytic and non-hemiepiphytic Ficus tree species. Functional Ecology 24:731-740. |
| Leaf and Whole-Plant Traits Database: Hydraulic and Gas Exchange Physiology, Anatomy, Venation Struc | (Hoof et al. 2008) | Hoof, J., L. Sack, D. T. Webb, and E. T. Nilsen. 2008. Contrasting structure and function of pubescent and glabrous varieties of Hawaiian Metrosideros polymorpha (Myrtaceae) at high elevation. Biotropica 40:113-118. |
| Pladias: Life forms and heights of the Czech flora | (Kaplan et al. 2019) | Kaplan Z., Danihelka J., Chrtek J. jun., Kirschner J., Kubát K., Štech M. & Štěpánek J. (eds) (2019): Klíč ke květeně České republiky [Key to the flora of the Czech Republic]. Ed. 2. Academia, Praha. |
| The LEDA Traitbase | (Kleyer et al. 2008) | Kleyer, M., R. M. Bekker, I. C. Knevel, J. P. Bakker, K. Thompson, M. Sonnenschein, P. Poschlod, J. M. van Groenendael, L. Klimes, J. Klimesova, S. Klotz, G. M. Rusch, Hermy, M. , D. Adriaens, G. Boedeltje, B. Bossuyt, A. Dannemann, P. Endels, L. Götzenberger, J. G. Hodgson, A.-K. Jackel, I. Kühn, D. Kunzmann, W. A. Ozinga, C. Römermann, M. Stadler, J. Schlegelmilch, H. J. Steendam, O. Tackenberg, B. Wilmann, J. H. C. Cornelissen, O. Eriksson, E. Garnier, and B. Peco. 2008. The LEDA Traitbase: a database of life-history traits of the Northwest European flora. Journal of Ecology 96:1266-1274. |
| BiolFlor Database | (Klotz, Kuhn & Durka 2002) | Klotz, S. & Kühn, I. (2002): Blattmerkmale. - In: Klotz, S., Kühn, I. & Durka, W. [Hrsg.]: BIOLFLOR - Eine Datenbank zu biologisch-ökologischen Merkmalen der Gefäßpflanzen in Deutschland. - Schriftenreihe für Vegetationskunde 38: 119-126. Bundesamt für Naturschutz, Bonn. |
| BiolFlor Database | (Klotz, Kuhn & Durka 2002) | Klotz, S. & Kühn, I. (2002): Indikatoren zum anthropogenen Einfluss auf die Vegetation. In: Klotz, S., Kühn, I. & Durka, W. [eds.]: BIOLFLOR - Eine Datenbank zu biologisch-ökologischen Merkmalen der Gefäßpflanzen in Deutschland. - Schriftenreihe für Vegetationskunde 38: 241-246. Bundesamt für Naturschutz, Bonn. |
| BiolFlor Database | (Klotz, Kuhn & Durka 2002) | Klotz, S. & Kühn, I. (2002): Soziologische Bindung der Arten. In: Klotz, S., Kühn, I. & Durka, W. [eds.]: BIOLFLOR - Eine Datenbank zu biologisch-ökologischen Merkmalen der Gefäßpflanzen in Deutschland. - Schriftenreihe für Vegetationskunde 38: 273-281. Bundesamt für Naturschutz, Bonn. |
| BiolFlor Database | (Klotz, Kuhn & Durka 2002) | Klotz, S. & Kühn, I. (2002): Ökologische Strategietypen. - In: Klotz, S., Kühn, I. & Durka, W. [Hrsg.]: BIOLFLOR - Eine Datenbank zu biologisch-ökologischen Merkmalen der Gefäßpflanzen in Deutschland. - Schriftenreihe für Vegetationskunde 38: 197-201. Bundesamt für Naturschutz, Bonn. |
| BiolFlor Database | (Klotz, Kuhn & Durka 2002) | Klotz, S., Kühn, I. & Durka, W. [eds.]: BIOLFLOR - Eine Datenbank zu biologisch-ökologischen Merkmalen der Gefäßpflanzen in Deutschland. - Schriftenreihe für Vegetationskunde 38. Bundesamt für Naturschutz, Bonn. |
| BiolFlor Database | (Klotz, Kuhn & Durka 2002) | Krumbiegel, A. (2002): Morphologie der vegetativen Organe (außer Blätter). In: Klotz, S., Kühn, I. & Durka, W. [eds.]: BIOLFLOR - Eine Datenbank zu biologisch-ökologischen Merkmalen der Gefäßpflanzen in Deutschland. - Schriftenreihe für Vegetationskunde 38: 93-118. Bundesamt für Naturschutz, Bonn. |
| BiolFlor Database | (Klotz, Kuhn & Durka 2002) | Kühn, I. Klotz, S. (2002): Angaben zu den Arealen. In: Klotz, S., Kühn, I. & Durka, W. [eds.]: BIOLFLOR - Eine Datenbank zu biologisch-ökologischen Merkmalen der Gefäßpflanzen in Deutschland. - Schriftenreihe für Vegetationskunde 38: 227-239. Bundesamt für Naturschutz, Bonn. |
| BiolFlor Database | (Kuhn nd Klotz 2002) | Kühn, I., Klotz, S. (2002): Floristischer Status und gebietsfremde Arten. In: Klotz, S., Kühn, I. & Durka, W. [eds.]: BIOLFLOR - Eine Datenbank zu biologisch-ökologischen Merkmalen der Gefäßpflanzen in Deutschland. - Schriftenreihe für Vegetationskunde 38: 47-56. Bundesamt für Naturschutz, Bonn. |
| BiolFlor Database | (Klotz, Kuhn & Durka 2002) | Kühn, I., W. Durka, and S. Klotz. 2004. BiolFlor - a new plant-trait database as a tool for plant invasion ecology. Diversity and Distribution 10 363-365. |
| Plant Traits for Pinus and Juniperus Forests in Arizona | (Laughlin et al. 2010) | Laughlin, D. C., J. J. Leppert, M. M. Moore, and C. H. Sieg. 2010. A multi-trait test of the leaf-height-seed plant strategy scheme with 133 species from a pine forest flora. Functional Ecology 24:493-501. |
| Plant Traits for Pinus and Juniperus Forests in Arizona | (Laughlin et al. 2011) | Laughlin, D.C., P.Z. Fulé, D.W. Huffman, J. Crouse, and E. Laliberte. 2011. Climatic constraints on trait-based forest assembly. Journal of Ecology 99:1489-1499. |
| Functional Resilience of Temperate Forests Dataset | (Liebergesell et al. 2016) | Liebergesell M, Reu B, Stahl U, Freiberg M, Welk E, Kattge J, Cornelissen JHC, Penuelas J, Wirth C (2016) Functional Resilience against Climate-Driven Extinctions - Comparing the Functional Diversity of European and North American Tree Floras. PLoS ONE 11(2): e0148607. doi:10.1371/journal.pone.0148607 |
| Traits from the Wildfire Project | (Moretti and Legg 2009) | Marco Moretti and Colin Legg (2009) Combining plant and animal traits to assess community functional responses to disturbance. Ecography 32: 299 309. doi: 10.1111/j.1600-0587.2008.05524.x |
| Leaf and Whole-Plant Traits Database: Hydraulic and Gas Exchange Physiology, Anatomy, Venation Struc | (Markesteijn et al. 2011) | Markesteijn, L., L. Poorter, H. Paz, L. Sack, and F. Bongers. 2011. Ecological differentiation in xylem cavitation resistance is associated with stem and leaf structural traits. Plant, Cell and Environment 34:137-148. |
| Leaf and Whole-Plant Traits Database: Hydraulic and Gas Exchange Physiology, Anatomy, Venation Struc | (Martin et al. 2007) | Martin, R. E., G. P. Asner, and L. Sack. 2007. Genetic variation in leaf pigment, optical and photosynthetic function among diverse phenotypes of Metrosideros polymorpha grown in a common garden. Oecologia 151:387-400. |
| Global Seed Mass, Plant Height Database | (Moles et al. 2005) | Moles, A. T., D. D. Ackerly, C. O. Webb, J. C. Tweddle, J. B. Dickie, A. J. Pitman, and M. Westoby. 2005. Factors that shape seed mass evolution. Proceedings of the National Academy of Sciences of the United States of America 102:10540-10544. |
| Global Seed Mass, Plant Height Database | (Moles et al. 2004) | Moles, A. T., D. S. Falster, M. R. Leishman, and M. Westoby. 2004. Small-seeded species produce more seeds per square metre of canopy per year, but not per individual per lifetime. Journal of Ecology 92:384-396. |
| Global Seed Mass, Plant Height Database | (Moles et al. 2009) | Moles, A.T., Warton, D.I., Warman, L., Swenson, N.G., Laffan, S.W., Zanne, A.E., Pitman, A., Hemmings, F.A. & Leishman, M.R. 2009 Global patterns in plant height. J Ecol 97, 923-932. |
| Leaf and Whole-Plant Traits Database: Hydraulic and Gas Exchange Physiology, Anatomy, Venation Struc | (Nakahashi et al. 2005) | Nakahashi, C. D., K. Frole, and L. Sack. 2005. Bacterial leaf nodule symbiosis in Ardisia (Myrsinaceae): Does it contribute to seedling growth capacity? Plant Biology 7:495-500. |
| Seed trait data from Neuschulz et al. 2016 Sci REp. | (Neuschulz et al. 2016) | Neuschulz, E. L., T. Mueller, M. Schleuning & K. Böhning-Gaese (2016) Pollination and seed dispersal are the most threatened processes of plant regeneration. Scientific Reports 6, Article number: 29839 |
| BiolFlor Database | (Otto, 2002) | Otto, B. (2002): Merkmale von Samen, Früchten, generativen Germinulen und generativen Diasporen. In: Klotz, S., Kühn, I. & Durka, W. [eds.]: BIOLFLOR - Eine Datenbank zu biologisch-ökologischen Merkmalen der Gefäßpflanzen in Deutschland. - Schriftenreihe für Vegetationskunde 38. Bundesamt für Naturschutz, Bonn. |
| Functional Traits of Trees | (Paine et al. 2015) | Paine CET, Amissah L, Auge H, Baraloto C, Baruffol M, … Hector A (2015) Globally, functional traits are weak predictors of juvenile tree growth, and we do not know why. Journal of Ecology, 103, 978–989. DOI: 10.1111/1365-2745.12401 |
| The VISTA Plant Trait Database | (Pakeman et al. 2008) | Pakeman, R. J., E. Garnier, S. Lavorel, P. Ansquer, H. Castro, P. Cruz, J. Dolezal, O. Eriksson, H. Freitas, C. Golodets, J. Kigel, M. Kleyer, J. Leps, T. Meier, M. Papadimitriou, V. P. Papanastasis, H. Quested, F. Quetier, G. Rusch, M. Sternberg, J. P. Theau, A. Thebault, and D. Vile. 2008. Impact of abundance weighting on the response of seed traits to climate and land use. Journal of Ecology 96:355-366. |
| The VISTA Plant Trait Database | (Pakeman et al. 2009) | Pakeman, R. J., J. Leps, M. Kleyer, S. Lavorel, E. Garnier, and V. Consortium. 2009. Relative climatic, edaphic and management controls of plant functional trait signatures. Journal of Vegetation Science 20:148-159. |
| Jasper Ridge Californian Woody Plants Database | (Preston et al. 2006) | Preston, K. A., W. K. Cornwell, and J. L. DeNoyer. 2006. Wood density and vessel traits as distinct correlates of ecological strategy in 51 California coast range angiosperms. New Phytologist 170:807-818. |
| Leaf and Whole-Plant Traits Database: Hydraulic and Gas Exchange Physiology, Anatomy, Venation Struc | (Quero et al. 2008) | Quero, J. L., R. Villar, T. Maranon, R. Zamora, D. Vega, and L. Sack. 2008. Relating leaf photosynthetic rate to whole-plant growth: drought and shade effects on seedlings of four Quercus species. Functional Plant Biology 35:725-737. |
| Seed Information Database, Royal Botanic Gardens, Kew | (Liu et al. 2019) | Royal Botanic Gardens Kew. (2019) Seed Information Database (SID). Version 7.1. Available from: http://data.kew.org/sid/ (06 2019) |
| KEW Seed Information Database (SID) | (Liu et al. 2019) | Royal Botanical Gardens KEW. 2008. Seed Information Database (SID). Version 7.1. Available from: http://data.kew.org/sid/ (May 2008). |
| KEW Seed Information Database (SID) | (Liu et al. 2019) | Royal Botanical Gardens KEW. 2008. Seed Information Database (SID). Version 7.1. Available from: http://data.kew.org/sid/ (May 2011). |
| Seed Information Database (SID) Seed Mass 2010 | (Liu et al. 2019) | Royal Botanical Gardens KEW. Seed Information Database (SID), http://data.kew.org/sid/ accessed May 2014 |
| Leaf and Whole-Plant Traits Database: Hydraulic and Gas Exchange Physiology, Anatomy, Venation Struc | (Sack 2004) | Sack, L. 2004. Responses of temperate woody seedlings to shade and drought: do trade-offs limit potential niche differentiation? Oikos 107:110-127. |
| Leaf and Whole-Plant Traits Database: Hydraulic and Gas Exchange Physiology, Anatomy, Venation Struc | (Sack and Frole 2006) | Sack, L. and K. Frole. 2006. Leaf structural diversity is related to hydraulic capacity in tropical rain forest trees. Ecology 87:483-491. |
| Leaf and Whole-Plant Traits Database: Hydraulic and Gas Exchange Physiology, Anatomy, Venation Struc | (Sack, Tyree & Holbrook, 2005) | Sack, L., M. T. Tyree, and N. M. Holbrook. 2005. Leaf hydraulic architecture correlates with regeneration irradiance in tropical rainforest trees. New Phytologist 167:403-413. |
| Leaf and Whole-Plant Traits Database: Hydraulic and Gas Exchange Physiology, Anatomy, Venation Struc | (Sack et al. 2003) | Sack, L., P. D. Cowan, N. Jaikumar, and N. M. Holbrook. 2003. The 'hydrology' of leaves: co-ordination of structure and function in temperate woody species. Plant Cell and Environment 26:1343-1356. |
| Leaf and Whole-Plant Traits Database: Hydraulic and Gas Exchange Physiology, Anatomy, Venation Struc | (Sack et al. 2006) | Sack, L., P. J. Melcher, W. H. Liu, E. Middleton, and T. Pardee. 2006. How strong is intracanopy leaf plasticity in temperate deciduous trees? American Journal of Botany 93:829-839. |
| Leaf and Whole-Plant Traits Database: Hydraulic and Gas Exchange Physiology, Anatomy, Venation Struc | (Scoffoni et al. 2008) | Scoffoni, C., A. Pou, K. Aasamaa, and L. Sack. 2008. The rapid light response of leaf hydraulic conductance: new evidence from two experimental methods. Plant Cell and Environment 31:1803-1812. |
| BROT 2.0 | (Tavşanoğlu and Pausas 2018) | Tavsanoglu C. & Pausas J.G. 2018. A functional trait database for Mediterranean Basin plants. Scientific Data 5:180135. http://dx.doi.org/10.1038/sdata.2018.135 |
| BiolFlor Database | (Trefflich, A., Klotz, S. & Kühn, I. 2002) | Trefflich, A., Klotz, S. & Kühn, I. (2002): Blühphänologie. In: Klotz, S., Kühn, I. & Durka, W. [eds.]: BIOLFLOR - Eine Datenbank zu biologisch-ökologischen Merkmalen der Gefäßpflanzen in Deutschland. - Schriftenreihe für Vegetationskunde 38: 127-131. Bundesamt für Naturschutz, Bonn. |
| Sheffield Database |  | unpub. |
| Leaf and Whole-Plant Traits Database: Hydraulic and Gas Exchange Physiology, Anatomy, Venation Struc |  | unpub. |
| Cold Tolerance, Seed Size and Height of North American Forest Tree Species |  | unpub. |
| Baccara - Plant Traits of European Forests |  | unpub. |
| Seed Mass from Literature |  | unpub. |
| Thom 2019 |  | unpub. |
| Leaf and Whole-Plant Traits Database: Hydraulic and Gas Exchange Physiology, Anatomy, Venation Struc | (Waite and Sack 2010) | Waite, M. and L. Sack. 2010. How does moss photosynthesis relate to leaf and canopy structure? Trait relationships for 10 Hawaiian species of contrasting light habitats. New Phytologist 185:156-172. |
| The Functional Ecology of Trees (FET) Database - Jena | (Wirth and Lichstein 2009) | Wirth, C. and J. W. Lichstein. 2009. The Imprint of Species Turnover on Old-Growth Forest Carbon Balances - Insights From a Trait-Based Model of Forest Dynamics. Pages 81-113 in C. Wirth, G. Gleixner, and M. Heimann, editors. Old-Growth Forests: Function, Fate and Value. Springer, New York, Berlin, Heidelberg. |

**References**

Ackerly, D. D., and W. K. Cornwell. 2007. A trait-based approach to community assembly: partitioning of species trait values into within- and among-community components. Ecology Letters 10:135–145.

Adler, P. B., R. Salguero-Gómez, A. Compagnoni, J. S. Hsu, J. Ray-Mukherjee, C. Mbeau-Ache, and M. Franco. 2014. Functional traits explain variation in plant life history strategies. Proceedings of the National Academy of Sciences of the United States of America 111:740–745.

Baird, A. S., C. D. Medeiros, M. A. Caringella, J. Bowers, M. Hii, J. Liang, J. Matsuda, et al. 2024. How and why do species break a developmental trade‐off? Elucidating the association of trichomes and stomata across species. American Journal of Botany 111:e16328.

Bartlett, M. K., C. Scoffoni, R. Ardy, Y. Zhang, S. Sun, K. Cao, and L. Sack. 2012. Rapid determination of comparative drought tolerance traits: using an osmometer to predict turgor loss point. Methods in Ecology and Evolution 3:880–888.

Bjorkman et al. 2018. Tundra Trait Team: A database of plant traits spanning the tundra biome - Bjorkman - 2018 - Global Ecology and Biogeography - Wiley Online Library.

Blonder, B., R. E. Kapas, R. M. Dalton, B. J. Graae, J. M. Heiling, and Ø. H. Opedal. 2018. Microenvironment and functional-trait context dependence predict alpine plant community dynamics. Journal of Ecology 106:1323–1337.

Bruun, H. H. 2019. Dataset on reproductive traits of Scandinavian alpine plants. Data in Brief 25:104149.

Burnham, K. P., and D. Anderson. 2004. Model Selection and Multi-Model Inference (2nd ed.). Springer-­Verlag, New York, NY.

Butterfield, B. J., and J. M. Briggs. 2011. Regeneration niche differentiates functional strategies of desert woody plant species. Oecologia 165:477–487.

Castro-Díez, P., J. P. Puyravaud, and J. H. C. Cornelissen. 2000. Leaf structure and anatomy as related to leaf mass per area variation in seedlings of a wide range of woody plant species and types. Oecologia 124:476–486.

Castro-Díez, P., J. P. Puyravaud, J. H. C. Cornelissen, and P. Villar-Salvador. 1998. Stem anatomy and relative growth rate in seedlings of a wide range of woody plant species and types. Oecologia 116:57–66.

Cavender-Bares, J., L. Sack, and J. Savage. 2007. Atmospheric and soil drought reduce nocturnal conductance in live oaks. Tree Physiology 27:611–620.

Choat, B., L. Sack, and N. M. Holbrook. n.d. Diversity of hydraulic traits in nine Cordia species growing in tropical forests with contrasting precipitation.

Coomes, D. A., S. Heathcote, E. R. Godfrey, J. J. Shepherd, and L. Sack. 2008. Scaling of xylem vessels and veins within the leaves of oak species. Biology Letters 4:302–306.

Cornelissen, J., R. Aerts, B. Cerabolini, M. Werger, and M. van der Heijden. 2001. Carbon cycling traits of plant species are linked with mycorrhizal strategy. Oecologia 129:611–619.

Cornelissen, J. H. C. 1996. An Experimental Comparison of Leaf Decomposition Rates in a Wide Range of Temperate Plant Species and Types. Journal of Ecology 84:573–582.

———. 1999. A triangular relationship between leaf size and seed size among woody species: allometry, ontogeny, ecology and taxonomy. Oecologia 118:248–255.

Cornelissen, J. H. C., P. Castro Diez, and R. Hunt. 1996. Seedling growth, allocation and leaf attributes in a wide range of woody plant species and types. Journal of Ecology 84:755–765.

Cornelissen, J. h. c., B. Cerabolini, P. Castro-Díez, P. Villar-Salvador, G. Montserrat-Martí, J. p. Puyravaud, M. Maestro, et al. 2003. Functional traits of woody plants: correspondence of species rankings between field adults and laboratory-grown seedlings? Journal of Vegetation Science 14:311–322.

Cornelissen, J. H. C., N. Pérez-Harguindeguy, S. Díaz, J. P. Grime, B. Marzano, M. Cabido, F. Vendramini, et al. 1999. Leaf structure and defence control litter decomposition rate across species and life forms in regional floras on two continents. New Phytologist 143:191–200.

Cornwell, W. K., and D. D. Ackerly. 2009. Community assembly and shifts in plant trait distributions across an environmental gradient in coastal California. Ecological Monographs 79:109–126.

Cornwell, W. K., R. Bhaskar, L. Sack, S. Cordell, and C. K. Lunch. 2007. Adjustment of structure and function of Hawaiian Metrosideros polymorpha at high vs. low precipitation. Functional Ecology 21:1063–1071.

Cornwell, W. K., L. D. W. Schwilk, and D. D. Ackerly. 2006. A trait-based test for habitat filtering: convex hull volume. Ecology 87:1465–1471.

Diaz, S., J. g. Hodgson, K. Thompson, M. Cabido, J. h. c. Cornelissen, A. Jalili, G. Montserrat-Martí, et al. 2004. The plant traits that drive ecosystems: Evidence from three continents. Journal of Vegetation Science 15:295–304.

Dunbar-Co,Stephanie, Sporck-Koehler, J Margaret, and Sack, Lawren. 2009. (PDF) Leaf Trait Diversification and Design in Seven Rare Taxa of the Hawaiian Plantago Radiation. ResearchGate.

Durka, W. 2002. Phylogenie der Farn- und Blütenpflanzen Deutschlands.

Duursma, R. A. 2015. Plantecophys - An R Package for Analysing and Modelling Leaf Gas Exchange Data. (P. C. Struik, ed.)PLOS ONE 10:e0143346.

Farquhar, G. D., and R. A. Richards. 1984. Isotopic composition of plant carbon correlates with water-use efficiency of Wheat genotypes. Australian Journal of Plant Physiology 11:539–552.

Fiorella, R. P., S. P. Good, S. T. Allen, J. S. Guo, C. J. Still, D. C. Noone, W. R. L. Anderegg, et al. 2021. Calibration Strategies for Detecting Macroscale Patterns in NEON Atmospheric Carbon Isotope Observations. Journal of Geophysical Research: Biogeosciences 126:e2020JG005862.

Fitter, A. H., and H. J. Peat. 1994. The Ecological Flora Database. Journal of Ecology 82:415–425.

Fortunel, C., E. Garnier, R. Joffre, E. Kazakou, H. Quested, K. Grigulis, S. Lavorel, et al. 2009. Leaf traits capture the effects of land use changes and climate on litter decomposability of grasslands across Europe. Ecology 90:598–611.

Franks, P. J., and G. D. Farquhar. 2007. The mechanical diversity of stomata and its significance in gas-exchange control. Plant Physiology 143:78–87.

Fry, B., R. Ganitt, K. Tholke, C. Neill, R. H. Michener, F. J. Mersch, and W. Brand. 1996. Cryoflow: Cryofocusing Nanomole Amounts of CO2, N2, and SO2 from an Elemental Analyzer for Stable Isotopic Analysis. Rapid communications in mass spectrometry.

Garnier, E., S. Lavorel, P. Ansquer, H. Castro, P. Cruz, J. Dolezal, O. Eriksson, et al. 2007. Assessing the effects of land-use change on plant traits, communities and ecosystem functioning in grasslands: a standardized methodology and lessons from an application to 11 European sites. Annals of Botany 99:967–985.

Green, W. 2009. Index of /downloads/data/PLANTSdatabase. USDA PLANTS Compilation. version 1, 09-02-02.

Hao, G., L. Sack, A. Wang, K. Cao, and G. Goldstein. 2010. Differentiation of leaf water flux and drought tolerance traits in hemiepiphytic and non‐hemiepiphytic *Ficus* tree species. Functional Ecology 24:731–740.

Hoof, J., L. Sack, D. T. Webb, and E. T. Nilsen. 2008. Contrasting Structure and Function of Pubescent and Glabrous Varieties of Hawaiian *Metrosideros polymorpha* (Myrtaceae) at High Elevation. Biotropica 40:113–118.

Kaklamanos, G., E. Aprea, and G. Theodoridis. 2020. Mass spectrometry: principles and instrumentation. Pages 525–552 *in* Y. Pico, ed. Chemical Analysis of Food (Second Edition). Academic Press.

Kaplan, Z., J. Danihelka, J. Chrtek, J. Zázvorka, P. Koutecký, L. Ekrt, R. Řepka, et al. 2019. Distributions of vascular plants in the Czech Republic. Preslia 91:257–368.

Kattge, J., G. Bönisch, S. Díaz, S. Lavorel, I. C. Prentice, P. Leadley, S. Tautenhahn, et al. 2020. TRY plant trait database – enhanced coverage and open access. Global Change Biology 26:119–188.

Kleyer, M., R. m. Bekker, I. c. Knevel, J. p. Bakker, K. Thompson, M. Sonnenschein, P. Poschlod, et al. 2008. The LEDA Traitbase: a database of life-history traits of the Northwest European flora. Journal of Ecology 96:1266–1274.

Klotz, Kuhn & Durka. 2002. BIOLFLOR – Eine Datenbank zu Biologisch-Ökologischen Merkmalen der Gefäßpflanzen in Deutschland | Request PDF. ResearchGate.

Laughlin, D. C., J. J. Leppert, M. M. Moore, and C. H. Sieg. 2010. A multi-trait test of the leaf-height-seed plant strategy scheme with 133 species from a pine forest flora. Functional Ecology. 24: 493-501. 493–501.

Laughlin et al. 2011. Climatic constraints on trait-based forest assembly.

Liebergesell, M., B. Reu, U. Stahl, M. Freiberg, E. Welk, J. Kattge, J. H. C. Cornelissen, et al. 2016. Functional Resilience against Climate-Driven Extinctions – Comparing the Functional Diversity of European and North American Tree Floras. PLOS ONE 11:e0148607.

Liu, U., T. A. Cossu, and J. Dickie. 2019. Royal Botanic Gardens, Kew’s Seed Information Database (SID): A compilation of taxon-based biological seed characteristics or traits. Biodiversity Information Science and Standards 3:e37030.

Markesteijn, L., L. Poorter, H. Paz, L. Sack, and F. Bongers. 2011. Ecological differentiation in xylem cavitation resistance is associated with stem and leaf structural traits. Plant, Cell & Environment 34:137–148.

Martin, R. E., G. P. Asner, and L. Sack. 2007. Genetic variation in leaf pigment, optical and photosynthetic function among diverse phenotypes of Metrosideros polymorpha grown in a common garden. Oecologia 151:387–400.

Medeiros, C. D., C. Scoffoni, G. P. John, M. K. Bartlett, F. Inman‐Narahari, R. Ostertag, S. Cordell, et al. 2019. An extensive suite of functional traits distinguishes Hawaiian wet and dry forests and enables prediction of species vital rates. (C. Violle, ed.)Functional Ecology 33:712–734.

Melcher, P. J., N. Michele Holbrook, M. J. Burns, M. A. Zwieniecki, A. R. Cobb, T. J. Brodribb, B. Choat, et al. 2012. Measurements of stem xylem hydraulic conductivity in the laboratory and field. Methods in Ecology and Evolution 3:685–694.

Moles, A. T., D. D. Ackerly, C. O. Webb, J. C. Tweddle, J. B. Dickie, A. J. Pitman, and M. Westoby. 2005. Factors that shape seed mass evolution. Proceedings of the National Academy of Sciences of the United States of America 102:10540–10544.

Moles, A. T., D. S. Falster, M. R. Leishman, and M. Westoby. 2004. Small-seeded species produce more seeds per square metre of canopy per year, but not per individual per lifetime. Journal of Ecology 92:384–396.

Moles et al. 2009. Global patterns in plant height - Moles - 2009 - Journal of Ecology - Wiley Online Library.

Monje, O. A., and B. Bugbee. 1992. Inherent Limitations of Nondestructive Chlorophyll Meters: A Comparison of Two Types of Meters. HortScience.

Moretti, M., and C. Legg. 2009. Combining plant and animal traits to assess community functional responses to disturbance. Ecography 32:299–309.

Muir, C. D. 2015. Making pore choices: repeated regime shifts in stomatal ratio. Proceedings of the Royal Society B: Biological Sciences 282:20151498.

———. 2018. Light and growth form interact to shape stomatal ratio among British angiosperms. New Phytologist 218:242–252.

Murphy, L. 2022. Likelihood: Methods for Maximum Likelihood Estimation. R.

Nakahashi, C. D., K. Frole, and L. Sack. 2005. Bacterial leaf nodule symbiosis in Ardisia (Myrsinaceae): does it contribute to seedling growth capacity? Plant Biology 7:495–500.

Neuschulz, E. L., T. Mueller, M. Schleuning, and K. Böhning-Gaese. 2016. Pollination and seed dispersal are the most threatened processes of plant regeneration. Scientific Reports 6:29839.

NOAA Global Monitoring Laboratory. 2018. NOAA Global Greenhouse Gas Reference Network. Earth System Research Laboratories.

Ogburn, R. M., and E. J. Edwards. 2012. Quantifying succulence: a rapid, physiologically meaningful metric of plant water storage. Plant, Cell & Environment.

Paine, C. E. T., L. Amissah, H. Auge, C. Baraloto, M. Baruffol, N. Bourland, H. Bruelheide, et al. 2015. Globally, functional traits are weak predictors of juvenile tree growth, and we do not know why.

Pakeman, R. J., E. Garnier, S. Lavorel, P. Ansquer, H. Castro, P. Cruz, J. Doležal, et al. 2008. Impact of abundance weighting on the response of seed traits to climate and land use. Journal of Ecology 96:355–366.

Pakeman, R. J., J. Lepš, M. Kleyer, S. Lavorel, E. Garnier, and the V. Consortium. 2009. Relative climatic, edaphic and management controls of plant functional trait signatures. Journal of Vegetation Science 20:148–159.

Pérez-Harguindeguy, N., S. Díaz, E. Garnier, S. Lavorel, H. Poorter, P. Jaureguiberry, M. S. Bret-Harte, et al. 2013. New handbook for standardised measurement of plant functional traits worldwide. Australian Journal of Botany 61.

Preston, K. A., W. K. Cornwell, and J. L. Denoyer. 2006. Wood density and vessel traits as distinct correlates of ecological strategy in 51 California coast range angiosperms. The New Phytologist 170:807–818.

Quero, J. L., R. Villar, T. Marañón, R. Zamora, D. Vega, and L. Sack. 2008. Relating leaf photosynthetic rate to whole-plant growth: drought and shade effects on seedlings of four Quercus species. Functional plant biology: FPB 35:725–737.

Sack, L. 2004. Responses of temperate woody seedlings to shade and drought: do trade-offs limit potential niche differentiation? Oikos 107:110–127.

Sack, L., and T. N. Buckley. 2016. The developmental basis of stomatal density and flux. Plant Physiology.

Sack, L., P. D. Cowan, N. Jaikumar, and N. M. Holbrook. 2003. The ‘hydrology’ of leaves: co-ordination of structure and function in temperate woody species. Plant, Cell & Environment 26:1343–1356.

Sack, L., and K. Frole. 2006. Leaf structural diversity is related to hydraulic capacity in tropical rain forest trees. Ecology 87:483–491.

Sack, L., P. J. Melcher, W. H. Liu, E. Middleton, and T. Pardee. 2006. How strong is intracanopy leaf plasticity in temperate deciduous trees? Journal of Botany.

Sack, Tyree & Holbrook,. 2005. Leaf hydraulic architecture correlates with regeneration irradiance in tropical rainforest trees - Sack - 2005 - New Phytologist - Wiley Online Library.

Salt, D. E., I. Baxter, and B. Lahner. 2008. Ionomics and the study of the plant ionome. Annual Review of Plant Biology 59:709–733.

Schneider, C. A., W. S. Rasband, and K. W. Eliceiri. 2012. NIH Image to ImageJ: 25 years of image analysis. Nature Methods 9:671–675.

Scoffoni, C., A. Pou, K. Aasamaa, and L. Sack. 2008. The rapid light response of leaf hydraulic conductance: new evidence from two experimental methods. Plant, Cell & Environment 31:1803–1812.

Scoffoni, C., M. Rawls, A. McKown, H. Cochard, and L. Sack. 2011. Decline of leaf hydraulic conductance with dehydration: Relationship to leaf size and venation architecture. Plant Physiology.

Tavşanoğlu, Ç., and J. G. Pausas. 2018. A functional trait database for Mediterranean Basin plants. Scientific Data 5:180135.

Waite, M., and L. Sack. 2010. How does moss photosynthesis relate to leaf and canopy structure? Trait relationships for 10 Hawaiian species of contrasting light habitats. New Phytologist 185:156–172.

Wirth, C., and J. W. Lichstein. 2009. The Imprint of Species Turnover on Old-Growth Forest Carbon Balances - Insights From a Trait-Based Model of Forest Dynamics. Pages 81–113 *in* C. Wirth, G. Gleixner, and M. Heimann, eds. Old-Growth Forests, Ecological Studies (Vol. 207). Springer Berlin Heidelberg, Berlin, Heidelberg.

Witkowski, E. T. F., and B. B. Lamont. 1991. Leaf specific mass confounds leaf density and thickness. Oecologia.

Zhao, B., E. Shevliakova, S. Malyshev, C. Medeiros, B. Medeiros, M. Browne, N. Vinod, et al. 2024. The control of plant traits on ecosystem functions across the US forests.

Zuleta, D., H. C. Muller‐Landau, A. Duque, N. Caro, D. Cardenas, N. Castaño, J. D. León‐Peláez, et al. 2022. Interspecific and intraspecific variation of tree branch, leaf and stomatal traits in relation to topography in an aseasonal Amazon forest. Functional Ecology 36:2955–2968.
